# Supplementary material for: How covalence breaks adsorption-energy scaling relations and solvation restores them
Source: Royal Society of Chemistry journal article supplement (doi:10.1039/c6sc02123a), 2016-08-05
Supplement: c6sc02123a1.pdf [file c6sc02123a1.pdf]

**Electronic Supplementary Information for:**

**How covalence breaks adsorption-energy scaling relations and solvation restores them**

Federico Calle-Vallejo,<sup>1,\*</sup> Alexander Krabbe,<sup>2</sup> Juan María García-Lastra<sup>2,\*</sup>

<sup>1</sup> Leiden Institute of Chemistry, Leiden University, P. O. Box 9502, 2300 RA Leiden, The Netherlands.

<sup>2</sup> Department of Energy Conversion & Storage, Technical University of Denmark, DK-4000 Roskilde, Denmark.

\*Emails: f.calle.vallejo@chem.leidenuniv.nl, jmgla@dtu.dk

**Table of contents**

|                                                            |    |
|------------------------------------------------------------|----|
| S1. Assessment of adsorption energies                      | 2  |
| S2. Modelling the oxygen evolution and reduction reactions | 6  |
| S3. Details of the calculations in ADF                     | 7  |
| S4. Spin states                                            | 9  |
| S.5. References                                            | 11 |
| S.6. Cartesian coordinates of the systems under study      | 12 |

## S1. Assessment of adsorption energies

The free energies in vacuum were estimated from DFT energies in the following way:  $G^{vac} = E_{DFT} + ZPE - TS$ . The zero-point energies (ZPE) of the molecules appear in Table S1 and were taken from previous studies.<sup>1-4</sup> Entropic corrections (TS) for molecules were also taken from those studies and correspond to  $T = 298.15$  K. The free energies in solution contain an additional solvation term:  $G^{solv} = E_{DFT} + ZPE - TS + E_{solv}$ .  $E_{solv}$  is calculated using the COSMO approach.<sup>5</sup>

Moreover, Table S2 contains the ZPE corrections for the porphyrins under study, Table S3 contains their solvation energies (see details of those calculations in section S4), and Table S4 contains the DFT adsorption energies without any corrections.

**Table S1.** ZPE and entropic corrections at 298.15 K in eV for the molecules in this study, from<sup>1-4</sup>.

| correction / species | H <sub>2</sub> O | H <sub>2</sub> |
|----------------------|------------------|----------------|
| TS                   | 0.67             | 0.41           |
| ZPE                  | 0.56             | 0.27           |

**Table S2.** ZPE in eV for the porphyrins (with and without adsorbates) in this study.

| transition metal | ligand          | clean  | *O     | *OH    | *OOH   |
|------------------|-----------------|--------|--------|--------|--------|
| Cr               | H               | 7.193  | 7.297  | 7.530  | 7.631  |
|                  | F               | 4.588  | 4.692  | 4.921  | 5.025  |
|                  | OH              | 8.536  | 8.643  | 8.870  | 8.969  |
|                  | CH <sub>3</sub> | 15.996 | 16.086 | 16.327 | 16.413 |
|                  | BH <sub>2</sub> | 10.947 | 11.058 | 11.284 | 11.378 |
|                  | NH <sub>2</sub> | 12.604 | 12.702 | 12.934 | 13.032 |
| Mn               | H               | 7.185  | 7.278  | 7.494  | 7.606  |
|                  | F               | 4.585  | 4.665  | 4.872  | 4.998  |
|                  | OH              | 8.531  | 8.617  | 8.831  | 8.945  |
|                  | CH <sub>3</sub> | 15.975 | 16.073 | 16.300 | 16.393 |
|                  | BH <sub>2</sub> | 10.904 | 11.032 | 11.255 | 11.358 |
|                  | NH <sub>2</sub> | 12.552 | 12.674 | 12.896 | 12.997 |
| Fe               | H               | 7.211  | 7.297  | 7.504  | 7.599  |
|                  | F               | 4.606  | 4.686  | 4.868  | 5.001  |
|                  | OH              | 8.560  | 8.638  | 8.848  | 8.948  |
|                  | CH <sub>3</sub> | 15.993 | 16.088 | 16.308 | 16.418 |
|                  | BH <sub>2</sub> | 10.938 | 11.054 | 11.273 | 11.381 |
|                  | NH <sub>2</sub> | 12.584 | 12.693 | 12.872 | 12.982 |
| Co               | H               | 7.223  | 7.249  | 7.552  | 7.624  |
|                  | F               | 4.616  | 4.638  | 4.952  | 5.060  |
|                  | OH              | 8.568  | 8.583  | 8.897  | 9.005  |
|                  | CH <sub>3</sub> | 16.015 | 16.056 | 16.357 | 16.455 |
|                  | BH <sub>2</sub> | 10.954 | 11.015 | 11.323 | 11.429 |
|                  | NH <sub>2</sub> | 12.613 | 12.627 | 12.950 | 13.052 |
| Ni               | H               | 7.225  | 7.234  | 7.518  | 7.626  |
|                  | F               | 4.613  | 4.621  | 4.888  | 4.990  |
|                  | OH              | 8.559  | 8.554  | 8.848  | 8.952  |
|                  | CH <sub>3</sub> | 16.021 | 16.024 | 16.327 | 16.309 |
|                  | BH <sub>2</sub> | 10.989 | 10.987 | 11.285 | 11.305 |
|                  | NH <sub>2</sub> | 12.605 | 12.596 | 12.883 | 12.981 |
| Cu               | H               | 7.180  | 7.198  | 7.470  | 7.582  |
|                  | F               | 4.561  | 4.573  | 4.844  | 4.949  |
|                  | OH              | 8.515  | 8.509  | 8.792  | 8.922  |
|                  | CH <sub>3</sub> | 15.978 | 15.982 | 16.256 | 16.364 |
|                  | BH <sub>2</sub> | 10.904 | 10.937 | 11.217 | 11.340 |
|                  | NH <sub>2</sub> | 12.566 | 12.542 | 12.812 | 12.946 |

**Table S3.** Solvation energies in eV for the porphyrins (with and without adsorbates) in this study.

| transition metal | ligand          | clean  | *O     | *OH    | *OOH   |
|------------------|-----------------|--------|--------|--------|--------|
| Cr               | H               | -0.603 | -0.887 | -0.967 | -0.982 |
|                  | F               | -0.271 | -0.432 | -0.554 | -0.564 |
|                  | OH              | -1.398 | -1.665 | -1.756 | -1.730 |
|                  | CH <sub>3</sub> | -0.757 | -1.039 | -1.055 | -1.142 |
|                  | BH <sub>2</sub> | -0.263 | -0.432 | -0.540 | -0.574 |
|                  | NH <sub>2</sub> | -1.626 | -1.971 | -2.039 | -2.063 |
| Mn               | H               | -0.597 | -1.179 | -1.120 | -1.145 |
|                  | F               | -0.279 | -0.674 | -0.567 | -0.623 |
|                  | OH              | -1.377 | -1.977 | -1.746 | -1.790 |
|                  | CH <sub>3</sub> | -0.752 | -1.333 | -1.214 | -1.282 |
|                  | BH <sub>2</sub> | -0.277 | -0.718 | -0.588 | -0.650 |
|                  | NH <sub>2</sub> | -1.624 | -2.401 | -2.229 | -2.284 |
| Fe               | H               | -0.613 | -1.027 | -0.951 | -0.931 |
|                  | F               | -0.270 | -0.546 | -0.467 | -0.504 |
|                  | OH              | -1.380 | -1.817 | -1.753 | -1.802 |
|                  | CH <sub>3</sub> | -0.806 | -1.176 | -1.110 | -1.118 |
|                  | BH <sub>2</sub> | -0.253 | -0.579 | -0.543 | -0.544 |
|                  | NH <sub>2</sub> | -1.654 | -2.213 | -2.075 | -2.094 |
| Co               | H               | -0.608 | -1.012 | -0.944 | -0.935 |
|                  | F               | -0.255 | -0.536 | -0.552 | -0.489 |
|                  | OH              | -1.371 | -1.813 | -1.757 | -1.705 |
|                  | CH <sub>3</sub> | -0.777 | -1.176 | -1.057 | -1.024 |
|                  | BH <sub>2</sub> | -0.250 | -0.512 | -0.556 | -0.492 |
|                  | NH <sub>2</sub> | -1.683 | -2.390 | -2.128 | -2.076 |
| Ni               | H               | -0.659 | -0.824 | -1.152 | -0.980 |
|                  | F               | -0.239 | -0.404 | -0.613 | -0.422 |
|                  | OH              | -1.426 | -1.757 | -1.914 | -1.717 |
|                  | CH <sub>3</sub> | -0.820 | -1.009 | -1.164 | -1.195 |
|                  | BH <sub>2</sub> | -0.248 | -0.389 | -0.663 | -0.560 |
|                  | NH <sub>2</sub> | -1.736 | -2.297 | -2.361 | -2.260 |
| Cu               | H               | -0.627 | -1.057 | -1.109 | -0.732 |
|                  | F               | -0.246 | -0.610 | -0.676 | -0.454 |
|                  | OH              | -1.385 | -1.878 | -1.824 | -1.559 |
|                  | CH <sub>3</sub> | -0.792 | -1.558 | -1.474 | -0.966 |
|                  | BH <sub>2</sub> | -0.244 | -0.558 | -0.631 | -0.518 |
|                  | NH <sub>2</sub> | -1.684 | -2.804 | -2.704 | -2.126 |

**Table S4.** DFT energies of adsorption ( $\Delta E$ ) in eV for the porphyrins (with and without adsorbates) in this study.

| transition metal | ligand          | *O   | *OH  | *OOH |
|------------------|-----------------|------|------|------|
| Cr               | H               | 1.05 | 0.25 | 3.45 |
|                  | F               | 1.09 | 0.29 | 3.47 |
|                  | OH              | 0.95 | 0.20 | 3.38 |
|                  | CH <sub>3</sub> | 0.83 | 0.11 | 3.29 |
|                  | BH <sub>2</sub> | 1.02 | 0.25 | 3.45 |
|                  | NH <sub>2</sub> | 0.88 | 0.14 | 3.32 |
| Mn               | H               | 1.45 | 0.44 | 3.64 |
|                  | F               | 1.47 | 0.42 | 3.62 |
|                  | OH              | 1.28 | 0.25 | 3.50 |
|                  | CH <sub>3</sub> | 1.25 | 0.28 | 3.49 |
|                  | BH <sub>2</sub> | 1.75 | 0.67 | 3.85 |
|                  | NH <sub>2</sub> | 1.14 | 0.17 | 3.38 |
| Fe               | H               | 1.54 | 0.63 | 3.69 |
|                  | F               | 1.59 | 0.57 | 3.68 |
|                  | OH              | 1.46 | 0.52 | 3.64 |
|                  | CH <sub>3</sub> | 1.40 | 0.52 | 3.60 |
|                  | BH <sub>2</sub> | 1.75 | 0.79 | 3.92 |
|                  | NH <sub>2</sub> | 1.38 | 0.43 | 3.47 |
| Co               | H               | 2.71 | 1.18 | 4.00 |
|                  | F               | 2.25 | 0.96 | 3.86 |
|                  | OH              | 2.11 | 0.90 | 3.84 |
|                  | CH <sub>3</sub> | 2.53 | 0.90 | 3.86 |
|                  | BH <sub>2</sub> | 2.70 | 1.13 | 4.04 |
|                  | NH <sub>2</sub> | 1.98 | 0.84 | 3.80 |
| Ni               | H               | 3.84 | 1.98 | 4.75 |
|                  | F               | 3.61 | 1.91 | 4.72 |
|                  | OH              | 3.58 | 1.74 | 4.67 |
|                  | CH <sub>3</sub> | 4.03 | 1.84 | 4.67 |
|                  | BH <sub>2</sub> | 4.02 | 2.01 | 4.77 |
|                  | NH <sub>2</sub> | 3.70 | 1.62 | 4.59 |
| Cu               | H               | 4.56 | 2.22 | 4.76 |
|                  | F               | 4.53 | 2.15 | 4.82 |
|                  | OH              | 4.22 | 1.96 | 4.69 |
|                  | CH <sub>3</sub> | 4.55 | 2.20 | 4.66 |
|                  | BH <sub>2</sub> | 4.95 | 2.39 | 4.81 |
|                  | NH <sub>2</sub> | 3.87 | 1.65 | 4.53 |

The effects of -F, -OH, CH<sub>3</sub> and -NH<sub>2</sub> and -BH<sub>2</sub> on the binding energies of \*OH on centers with metals from Cr to Cu are presented in Table S5, with respect to conventional porphyrin rings with -H ligands. The table contains differences in the adsorption energies, so that the value of -0.27 eV for Co rings with -CH<sub>3</sub> ligands means that, compared to a ring with -H ligands, the \*OH adsorption energies are strengthened by 0.27 eV.

**Table S5.** Ligand effects on the adsorption energies of \*OH on porphyrins with metal centers from Cr to Cu. All values are in eV and represent the adsorption energies with respect to those of the corresponding rings with -H ligands.

| metal/ligand | -F    | -OH   | -CH <sub>3</sub> | -BH <sub>2</sub> | -NH <sub>2</sub> |
|--------------|-------|-------|------------------|------------------|------------------|
| Cr           | 0.04  | -0.05 | -0.14            | 0.01             | -0.11            |
| Mn           | -0.02 | -0.19 | -0.16            | 0.22             | -0.27            |
| Fe           | -0.06 | -0.11 | -0.11            | 0.16             | -0.20            |
| Co           | -0.22 | -0.28 | -0.27            | -0.04            | -0.34            |
| Ni           | -0.07 | -0.24 | -0.14            | 0.03             | -0.36            |
| Cu           | -0.08 | -0.26 | -0.02            | 0.16             | -0.58            |

## S2. Modelling the oxygen evolution and reduction reactions

We used the computational hydrogen (CHE) approach<sup>6</sup> to model concerted proton-electron transfers. In it, the energetics of H<sub>2</sub>(g) is used instead of that of (H<sup>+</sup>+e<sup>-</sup>) as an electrochemical reference due to the following relationship in equilibrium:  $\mu(H^+ + e^-) = \frac{1}{2}\mu(H_2)$ . In previous studies we used the following OER mechanism<sup>3,4</sup>:

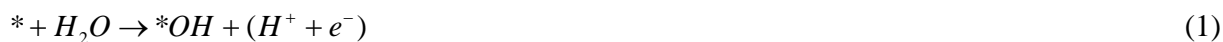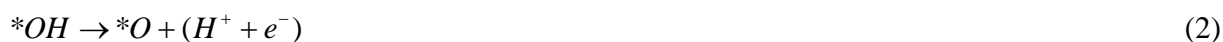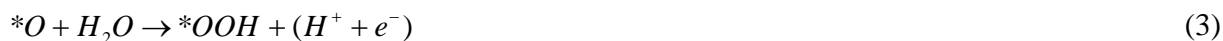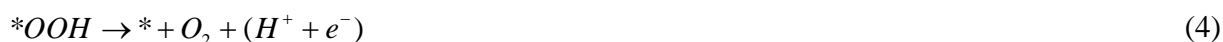

Here \* denotes a free adsorption site at the metal center of a porphyrin ring. The adsorption energies of \*O, \*OH and \*OOH are calculated using the following reactions:

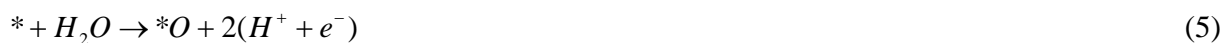

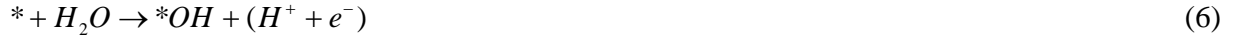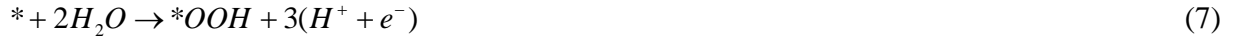

Note that the free energies of reactions (5-7) are  $\Delta G_O$ ,  $\Delta G_{OH}$ ,  $\Delta G_{OOH}$ , respectively and can be assessed in vacuum and in solution. It can be shown that the free energies of reactions (1-4) can be represented in terms of those of reactions (5-7) as follows,<sup>7</sup> with  $\Delta G_{O_2} = 1.23 \text{ V} \times 4e^- = 4.92 \text{ eV}$  :

$$\Delta G_1 = \Delta G_{OH} \quad (8)$$

$$\Delta G_2 = \Delta G_O - \Delta G_{OH} \quad (9)$$

$$\Delta G_3 = \Delta G_{OOH} - \Delta G_O \quad (10)$$

$$\Delta G_4 = \Delta G_{O_2} - \Delta G_{OOH} \quad (11)$$

Finally, the OER overpotential is estimated as the maximal free energy among those in the reaction pathway (1-4) and the corresponding reaction is known as the potential determining step (PDS). Typically, reactions (2) and (3) are potential-limiting for the OER.

$$\eta_{OER} = \max(\Delta G_1, \Delta G_2, \Delta G_3, \Delta G_4) - 1.23 \quad (12)$$

The mechanism of the ORR is the inverse of reactions (1-4), and the typical PDSs are reactions (1) and (4). The overpotential is in this case defined as follows:

$$\eta_{ORR} = 1.23 - \min(\Delta G_1, \Delta G_2, \Delta G_3, \Delta G_4) \quad (13)$$

### S3. Details of the calculations in ADF

Solvation energies, Bader charges, and zero-phonon energies were computed using the Amsterdam Density Functional (ADF) package, v. 2013.<sup>8</sup> In all these calculations the geometry was kept frozen to the relaxed geometry found in the VASP calculations. For the sake of consistency with the VASP calculations the RPBE exchange-correlation functional was employed. All atoms were described through basis sets of TZP quality (triple- $\zeta$  STO plus one polarization function) given in the program database, including all the core electrons in the calculation (i.e. with no frozen core approximation).

Solvation energies were calculated using the Conductor like Screening Model (COSMO)<sup>5</sup> as implemented in ADF. The solvation energy was computed as the difference in total energy between a calculation without any solvent (gas phase) and a calculation in which water was modelled as the solvent (we took 78.39 as the relative dielectric constant and 1.93 as the radius of the rigid sphere solvent molecules). The Bader analysis was carried out using the default parameters of the code.<sup>9</sup> The zero-phonon energies were calculated employing the analytical second derivatives.

Finally, it is important to verify that the presence of explicit water will not change the main conclusions of this study. Thus, we added 3 explicit water molecules around \*OH and \*OOH as shown below in Fig. S1. The solvation energies of \*OH and \*OOH with 3 explicit water molecules were calculated on the rings with -H and -F ligands and all metal centers and the comparison with respect to the case in which water is only implicit is given in Fig. S2. Ideally, if the implicit method describes well the adsorbate-solvent interactions, all points should fall on the red dashed line. According to Fig. S2, there is a good agreement between the solvation energy differences calculated with implicit and explicit water.

In practical terms, such good agreement between explicit and implicit solvation shows that the use of an implicit method to account for solvent-adsorbate interactions is suitable in the particular case of porphyrin rings. This is a useful conclusion, as implicit solvation methods are substantially more affordable in computational terms compared to the explicit ones.

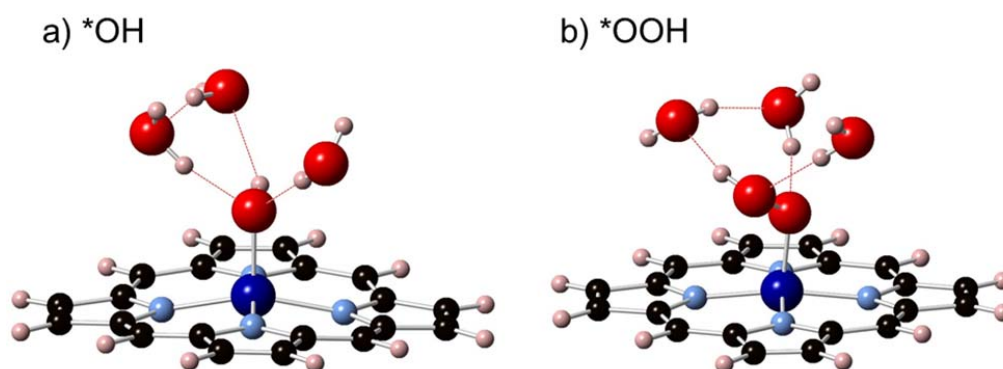

**Fig. S1** Three explicit water molecules in the first solvation shell of a) \*OH and b) \*OOH.



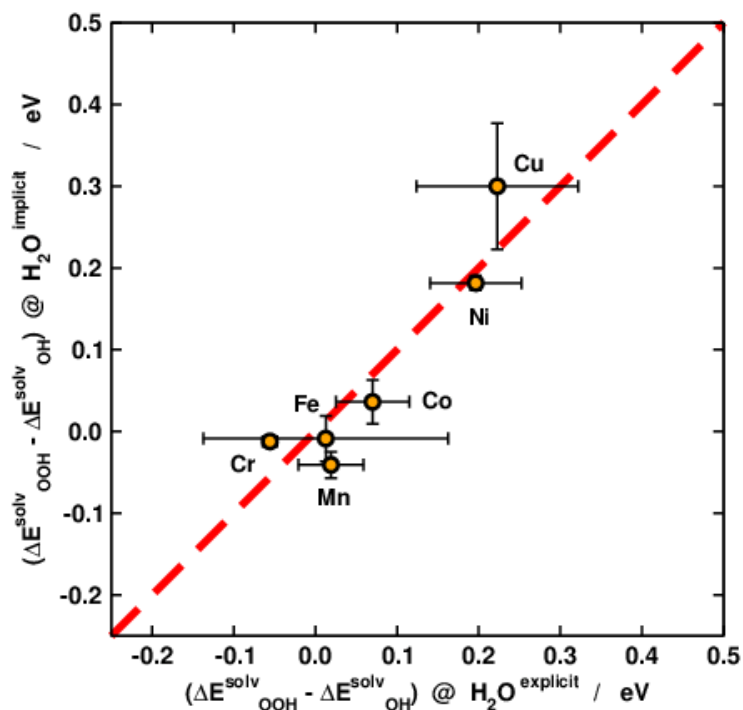

**Fig. S2** Comparison between the differences in \*OOH and \*OH solvation with “explicit” and “implicit” water. “Implicit” water is modelled with COSMO, while “explicit” water is a combination of a first shell of 3 explicit water molecules plus COSMO in the surroundings.

#### S4. Spin states

In Table S6 we provide the ground-state spin configuration, namely the difference between the number of electrons with spin up minus the number of electrons with spin down, for all the systems considered in this study. In each case, several spin values were considered, so that Table S6 contains only the most stable ones. The values are commensurate with those of previous studies.<sup>3, 4, 10</sup>

**Table S6.** Ground-state spin configuration (i.e. number of electrons with spin up minus number of electrons with spin down) for all the systems considered in this study.

| Transition Metal | ligand          | clean | *O | *OH | *OOH |
|------------------|-----------------|-------|----|-----|------|
| Cr               | H               | 4     | 0  | 3   | 3    |
|                  | F               | 4     | 0  | 3   | 3    |
|                  | OH              | 4     | 0  | 3   | 3    |
|                  | CH <sub>3</sub> | 4     | 0  | 3   | 3    |
|                  | BH <sub>2</sub> | 4     | 0  | 3   | 3    |
|                  | NH <sub>2</sub> | 4     | 0  | 3   | 3    |
| Mn               | H               | 3     | 3  | 4   | 4    |
|                  | F               | 3     | 3  | 4   | 4    |
|                  | OH              | 3     | 3  | 4   | 4    |
|                  | CH <sub>3</sub> | 3     | 3  | 4   | 4    |
|                  | BH <sub>2</sub> | 3     | 3  | 4   | 4    |
|                  | NH <sub>2</sub> | 3     | 3  | 4   | 4    |
| Fe               | H               | 2     | 2  | 3   | 1    |
|                  | F               | 2     | 2  | 5   | 3    |
|                  | OH              | 2     | 2  | 5   | 1    |
|                  | CH <sub>3</sub> | 2     | 2  | 3   | 1    |
|                  | BH <sub>2</sub> | 2     | 2  | 3   | 3    |
|                  | NH <sub>2</sub> | 2     | 2  | 3   | 1    |
| Co               | H               | 1     | 3  | 2   | 0    |
|                  | F               | 1     | 3  | 0   | 0    |
|                  | OH              | 1     | 3  | 0   | 0    |
|                  | CH <sub>3</sub> | 1     | 3  | 0   | 0    |
|                  | BH <sub>2</sub> | 1     | 3  | 0   | 0    |
|                  | NH <sub>2</sub> | 1     | 3  | 0   | 0    |
| Ni               | H               | 0     | 4  | 1   | 1    |
|                  | F               | 0     | 4  | 1   | 3    |
|                  | OH              | 0     | 4  | 1   | 1    |
|                  | CH <sub>3</sub> | 0     | 4  | 1   | 1    |
|                  | BH <sub>2</sub> | 0     | 4  | 1   | 1    |
|                  | NH <sub>2</sub> | 0     | 4  | 1   | 1    |
| Cu               | H               | 1     | 3  | 2   | 2    |
|                  | F               | 1     | 3  | 2   | 2    |
|                  | OH              | 1     | 3  | 2   | 2    |
|                  | CH <sub>3</sub> | 1     | 3  | 2   | 2    |
|                  | BH <sub>2</sub> | 1     | 3  | 2   | 2    |
|                  | NH <sub>2</sub> | 1     | 1  | 0   | 2    |

## S.5. References

1. I. C. Man, H.-Y. Su, F. Calle-Vallejo, H. A. Hansen, J. I. Martínez, N. G. Inoglu, J. Kitchin, T. F. Jaramillo, J. K. Nørskov and J. Rossmeisl, *ChemCatChem*, 2011, **3**, 1159-1165.
2. J. K. Nørskov, J. Rossmeisl, A. Logadottir, L. Lindqvist, J. R. Kitchin, T. Bligaard and H. Jónsson, *The Journal of Physical Chemistry B*, 2004, **108**, 17886-17892.
3. F. Calle-Vallejo, J. Ignacio Martinez and J. Rossmeisl, *Physical Chemistry Chemical Physics*, 2011, **13**, 15639-15643.
4. F. Calle-Vallejo, J. I. Martinez, J. M. Garcia-Lastra, E. Abad and M. T. M. Koper, *Surface Science*, 2013, **607**, 47-53.
5. A. Klamt and G. Schuurmann, *Journal of the Chemical Society, Perkin Transactions 2*, 1993, 799-805.
6. J. K. Nørskov, J. Rossmeisl, A. Logadottir, L. Lindqvist, J. R. Kitchin, T. Bligaard and H. Jónsson, *Journal of Physical Chemistry B*, 2004, **108**, 17886-17892.
7. F. Calle-Vallejo and M. T. M. Koper, *Electrochimica Acta*, 2012, **84**, 3-11.
8. G. te Velde, F. M. Bickelhaupt, E. J. Baerends, C. Fonseca Guerra, S. J. A. van Gisbergen, J. G. Snijders and T. Ziegler, *Journal of Computational Chemistry*, 2001, **22**, 931-967.
9. J. I. Rodríguez, R. F. W. Bader, P. W. Ayers, C. Michel, A. W. Götz and C. Bo, *Chemical Physics Letters*, 2009, **472**, 149-152.
10. M. T. de Groot and M. T. M. Koper, *Physical Chemistry Chemical Physics*, 2008, **10**, 1023-1031.

## **S.6. Cartesian coordinates of the systems under study**

In the following pages the cartesian coordinates of all the systems included in this study are listed. Firstly we list all the systems used in the calculations where the first solvation shell was not explicitly included. Secondly we list the cartesian coordinates of the systems which include the first solvation shell detailed in Fig. S1.

**Systems with no explicit solvation**

Transition Metal: Co; Functional Group: BH2; Adsorbate: Clean

|    |                    |                    |                   |
|----|--------------------|--------------------|-------------------|
| H  | 8.335170000000000  | 16.543959999999998 | 6.071920000000000 |
| H  | 10.000249999999999 | 17.597760000000001 | 6.701530000000000 |
| H  | 6.251020000000000  | 13.820700000000000 | 8.417420000000000 |
| H  | 6.803050000000000  | 15.420260000000001 | 7.353760000000000 |
| H  | 11.712899999999999 | 4.398790000000000  | 6.785060000000000 |
| H  | 13.341360000000000 | 5.434300000000000  | 6.040480000000000 |
| H  | 14.856790000000000 | 6.586960000000000  | 7.289320000000000 |
| H  | 15.620930000000000 | 8.255160000000000  | 6.448620000000000 |
| H  | 9.005060000000000  | 4.890110000000000  | 8.173260000000001 |
| H  | 8.664990000000000  | 5.238420000000000  | 6.169350000000000 |
| H  | 13.711620000000000 | 15.574490000000001 | 6.178350000000000 |
| H  | 12.912080000000000 | 17.285480000000000 | 6.926110000000000 |
| H  | 6.241170000000000  | 7.695710000000000  | 7.687740000000000 |
| H  | 7.689950000000000  | 6.267910000000000  | 7.650840000000000 |
| H  | 16.385320000000000 | 13.469860000000001 | 8.629970000000000 |
| H  | 17.450250000000000 | 11.894510000000000 | 7.813680000000000 |
| H  | 15.451230000000001 | 8.165550000000000  | 8.365970000000001 |
| H  | 17.141749999999998 | 8.974690000000001  | 7.584700000000000 |
| H  | 13.639060000000001 | 15.788110000000000 | 8.091049999999999 |
| H  | 15.289009999999999 | 14.986170000000000 | 7.258220000000000 |
| H  | 4.558410000000000  | 12.995080000000000 | 7.642680000000000 |
| H  | 6.070110000000000  | 13.745870000000000 | 6.500420000000000 |
| H  | 4.886040000000000  | 8.916190000000000  | 6.704730000000000 |
| H  | 5.022670000000000  | 8.977169999999999  | 8.764279999999999 |
| C  | 10.154230000000000 | 15.262670000000000 | 7.011730000000000 |
| C  | 9.685240000000000  | 13.871740000000001 | 7.158060000000000 |
| C  | 8.351070000000000  | 13.426420000000000 | 7.274070000000000 |
| C  | 11.578390000000001 | 6.732250000000000  | 7.068460000000000 |
| C  | 12.035510000000000 | 8.133860000000000  | 7.157970000000000 |
| C  | 13.345879999999999 | 8.600770000000001  | 7.238740000000000 |
| C  | 10.189970000000001 | 6.777080000000000  | 7.236120000000000 |
| C  | 9.844500000000000  | 8.178500000000000  | 7.342320000000000 |
| C  | 11.550150000000000 | 15.180920000000000 | 7.101620000000000 |
| C  | 8.492830000000000  | 8.557079999999999  | 7.480330000000000 |
| C  | 15.104300000000000 | 11.714359999999999 | 7.581180000000000 |
| C  | 11.887130000000001 | 13.795740000000000 | 7.240210000000000 |
| C  | 13.708500000000001 | 12.179550000000001 | 7.465260000000000 |
| C  | 15.026770000000001 | 10.323480000000000 | 7.469960000000000 |
| C  | 13.633170000000000 | 9.979730000000000  | 7.356510000000000 |
| C  | 13.257199999999999 | 13.497610000000000 | 7.353220000000000 |
| C  | 6.686720000000000  | 11.670859999999999 | 7.517230000000000 |
| C  | 8.077700000000000  | 12.066670000000000 | 7.394840000000000 |
| C  | 6.672320000000000  | 10.284440000000000 | 7.578170000000000 |
| C  | 8.085330000000001  | 9.899670000000000  | 7.492250000000000 |
| B  | 9.420560000000000  | 16.548249999999999 | 6.584490000000000 |
| B  | 6.969070000000000  | 14.238020000000001 | 7.363750000000000 |
| B  | 12.288910000000000 | 5.445640000000000  | 6.617570000000000 |
| B  | 14.712280000000000 | 7.771150000000000  | 7.312490000000000 |
| B  | 9.097670000000001  | 5.635720000000000  | 7.226240000000000 |
| B  | 12.829110000000000 | 16.098800000000001 | 7.053080000000000 |
| B  | 7.456850000000000  | 7.486270000000000  | 7.593990000000000 |
| B  | 16.394580000000001 | 12.436340000000000 | 8.018969999999999 |
| B  | 15.951990000000000 | 9.050870000000000  | 7.486440000000000 |
| B  | 14.101739999999999 | 14.856790000000000 | 7.244030000000000 |
| B  | 5.749330000000000  | 12.927659999999999 | 7.535190000000000 |
| B  | 5.517620000000000  | 9.220560000000001  | 7.689040000000000 |
| Co | 10.866970000000000 | 11.019560000000000 | 7.329580000000000 |
| N  | 10.765359999999999 | 12.989520000000001 | 7.262910000000000 |
| N  | 10.938490000000000 | 9.005810000000000  | 7.282540000000000 |
| N  | 12.825630000000000 | 11.092129999999999 | 7.364000000000000 |
| N  | 8.930280000000000  | 10.975199999999999 | 7.390650000000000 |

Transition Metal: Co; Functional Group: BH2; Adsorbate: O

|    |                    |                    |                   |
|----|--------------------|--------------------|-------------------|
| C  | 10.153540000000000 | 15.293860000000000 | 6.646900000000000 |
| C  | 9.679779999999999  | 13.900869999999999 | 6.806140000000000 |
| C  | 8.349330000000000  | 13.437130000000000 | 6.932910000000000 |
| C  | 11.574930000000000 | 6.696610000000000  | 6.713740000000000 |
| C  | 12.032140000000000 | 8.102169999999999  | 6.822270000000000 |
| C  | 13.336280000000000 | 8.593810000000000  | 6.903970000000000 |
| C  | 10.186909999999999 | 6.740240000000000  | 6.897430000000000 |
| C  | 9.845549999999999  | 8.147449999999999  | 7.032390000000000 |
| C  | 11.549239999999999 | 15.209050000000000 | 6.744730000000000 |
| C  | 8.499450000000000  | 8.548970000000001  | 7.193350000000000 |
| C  | 15.099890000000000 | 11.718959999999999 | 7.210160000000000 |
| C  | 11.880440000000000 | 13.820910000000000 | 6.901100000000000 |
| C  | 13.701580000000000 | 12.189740000000000 | 7.158420000000000 |
| C  | 15.014670000000001 | 10.328279999999999 | 7.092600000000000 |
| C  | 13.617509999999999 | 9.978920000000000  | 7.038250000000000 |
| C  | 13.247529999999999 | 13.510320000000000 | 7.038210000000000 |
| C  | 6.697380000000000  | 11.668609999999999 | 7.167660000000000 |
| C  | 8.086940000000000  | 12.076350000000000 | 7.091890000000000 |
| C  | 6.688580000000000  | 10.280200000000001 | 7.231930000000000 |
| C  | 8.105510000000001  | 9.899910000000000  | 7.207520000000000 |
| B  | 9.422630000000000  | 16.583850000000002 | 6.222660000000000 |
| B  | 6.954730000000000  | 14.233879999999999 | 6.959450000000000 |
| B  | 12.283740000000000 | 5.407720000000000  | 6.264100000000000 |
| B  | 14.713260000000000 | 7.777040000000000  | 6.916420000000000 |
| B  | 9.094709999999999  | 5.601620000000000  | 6.890920000000000 |
| B  | 12.836020000000000 | 16.117960000000000 | 6.712410000000000 |
| B  | 7.442950000000000  | 7.499150000000000  | 7.291000000000000 |
| B  | 16.418859999999999 | 12.431870000000000 | 7.578620000000000 |
| B  | 15.947960000000000 | 9.060620000000000  | 7.052490000000000 |
| B  | 14.097849999999999 | 14.870160000000000 | 6.932720000000000 |
| B  | 5.745930000000000  | 12.916150000000000 | 7.117210000000000 |
| B  | 5.542070000000000  | 9.198090000000001  | 7.259450000000000 |
| Co | 10.869510000000000 | 11.041340000000000 | 7.358810000000000 |
| H  | 8.339710000000000  | 16.583549999999999 | 5.706200000000000 |
| H  | 10.002440000000000 | 17.631489999999999 | 6.352630000000000 |
| H  | 6.204990000000000  | 13.835710000000001 | 7.996280000000000 |
| H  | 6.778460000000000  | 15.413470000000000 | 6.910740000000000 |
| H  | 11.692909999999999 | 4.366050000000000  | 6.411540000000000 |
| H  | 13.350099999999999 | 5.387720000000000  | 5.714560000000000 |
| H  | 14.863460000000000 | 6.594750000000000  | 6.871010000000000 |
| H  | 15.582689999999999 | 8.276020000000001  | 6.020630000000000 |
| H  | 8.987190000000000  | 4.873600000000000  | 7.848770000000000 |
| H  | 8.647470000000000  | 5.208630000000000  | 5.840010000000000 |
| H  | 13.728899999999999 | 15.581280000000000 | 5.856010000000000 |
| H  | 12.932010000000000 | 17.303300000000000 | 6.582250000000000 |
| H  | 6.226890000000000  | 7.730910000000000  | 7.399040000000000 |
| H  | 7.654050000000000  | 6.278870000000000  | 7.318300000000000 |
| H  | 16.454560000000001 | 13.475090000000000 | 8.169729999999999 |
| H  | 17.454219999999999 | 11.867250000000000 | 7.335750000000000 |
| H  | 15.490580000000000 | 8.164360000000000  | 7.943580000000000 |
| H  | 17.141150000000000 | 8.995279999999999  | 7.101490000000000 |
| H  | 13.621779999999999 | 15.804720000000000 | 7.767820000000000 |
| H  | 15.283700000000000 | 14.999230000000001 | 6.971090000000000 |
| H  | 4.551380000000000  | 12.969300000000000 | 7.180320000000000 |
| H  | 6.092710000000000  | 13.712500000000000 | 6.075190000000000 |
| H  | 5.003740000000000  | 8.884090000000000  | 6.223320000000000 |
| H  | 4.928660000000000  | 9.001700000000000  | 8.282260000000001 |
| O  | 10.901719999999999 | 10.987880000000001 | 9.059450000000000 |
| N  | 10.755820000000000 | 13.031890000000001 | 6.916920000000000 |
| N  | 10.936220000000000 | 8.955629999999999  | 6.965190000000000 |
| N  | 12.826190000000000 | 11.098800000000001 | 7.084840000000000 |
| N  | 8.936070000000001  | 10.981800000000000 | 7.121770000000000 |

Transition Metal: Co; Functional Group: BH2; Adsorbate: OH

|    |                     |                     |                    |
|----|---------------------|---------------------|--------------------|
| C  | 10.1533200000000001 | 15.2684400000000000 | 6.6180500000000000 |
| C  | 9.6833800000000000  | 13.8773000000000000 | 6.7329500000000000 |
| C  | 8.3486100000000001  | 13.4291699999999999 | 6.8038400000000000 |
| C  | 11.5817400000000000 | 6.7304300000000000  | 6.6888600000000000 |
| C  | 12.0367400000000000 | 8.1365099999999999  | 6.7357800000000000 |
| C  | 13.3472399999999999 | 8.6061599999999999  | 6.7737500000000000 |
| C  | 10.1959900000000000 | 6.7777500000000000  | 6.8695800000000000 |
| C  | 9.8518000000000001  | 8.1837700000000001  | 6.9367900000000000 |
| C  | 11.5479900000000000 | 15.1869999999999999 | 6.7307200000000000 |
| C  | 8.4987700000000000  | 8.5640500000000000  | 7.0429500000000000 |
| C  | 15.1192600000000001 | 11.7184600000000000 | 7.0310400000000000 |
| C  | 11.8870000000000000 | 13.8002500000000000 | 6.8477300000000000 |
| C  | 13.7177799999999999 | 12.1831800000000000 | 6.9736200000000000 |
| C  | 15.0358000000000000 | 10.3300400000000000 | 6.9115100000000000 |
| C  | 13.6367700000000000 | 9.9876900000000001  | 6.8475800000000000 |
| C  | 13.2599600000000000 | 13.5018700000000000 | 6.9295000000000000 |
| C  | 6.6812500000000000  | 11.6677900000000000 | 6.9708500000000000 |
| C  | 8.0741900000000000  | 12.0661000000000000 | 6.8787900000000000 |
| C  | 6.6696300000000000  | 10.2814200000000001 | 7.0335300000000000 |
| C  | 8.0862200000000001  | 9.9017599999999999  | 6.9844100000000000 |
| B  | 9.4248300000000000  | 16.5607399999999999 | 6.2009100000000000 |
| B  | 6.9640600000000000  | 14.2382000000000001 | 6.8796200000000000 |
| B  | 12.2833400000000001 | 5.4315100000000000  | 6.2574000000000000 |
| B  | 14.7148500000000000 | 7.7759100000000000  | 6.8248500000000000 |
| B  | 9.0991800000000000  | 5.6410800000000000  | 6.8873100000000000 |
| B  | 12.8248200000000001 | 16.1080200000000000 | 6.6975000000000000 |
| B  | 7.4649100000000000  | 7.4940200000000000  | 7.1996400000000000 |
| B  | 16.4313100000000000 | 12.4269000000000000 | 7.4284000000000000 |
| B  | 15.9599400000000000 | 9.0566200000000001  | 6.9201100000000000 |
| B  | 14.1005000000000000 | 14.8657900000000001 | 6.8510400000000000 |
| B  | 5.7420900000000000  | 12.9231300000000000 | 6.9889500000000000 |
| B  | 5.5165900000000000  | 9.2140100000000000  | 7.1176100000000000 |
| Co | 10.8646900000000000 | 11.0315600000000001 | 7.0054500000000000 |
| H  | 10.6734000000000001 | 11.9020700000000000 | 9.1506799999999999 |
| H  | 8.3606400000000000  | 16.5619100000000001 | 5.6457100000000000 |
| H  | 9.9898900000000001  | 17.6105200000000001 | 6.3733900000000000 |
| H  | 6.2220500000000000  | 13.7956000000000000 | 7.9045300000000000 |
| H  | 6.7967700000000000  | 15.4202300000000000 | 6.8919900000000000 |
| H  | 11.7201100000000000 | 4.3892400000000000  | 6.4859800000000000 |
| H  | 13.3120200000000000 | 5.4038600000000000  | 5.6392600000000000 |
| H  | 14.8557600000000000 | 6.5911600000000000  | 6.8269900000000000 |
| H  | 15.5908700000000001 | 8.2354900000000000  | 5.9159400000000000 |
| H  | 9.0162200000000001  | 4.9059300000000000  | 7.8428300000000000 |
| H  | 8.6501400000000000  | 5.2342100000000000  | 5.8410500000000000 |
| H  | 13.7034699999999999 | 15.6086700000000000 | 5.8052900000000000 |
| H  | 12.9044399999999999 | 17.2977400000000001 | 6.6021500000000000 |
| H  | 6.2471300000000000  | 7.6998400000000000  | 7.2653600000000000 |
| H  | 7.7063400000000000  | 6.2839000000000000  | 7.3408500000000000 |
| H  | 16.4571299999999999 | 13.4487799999999999 | 8.0575300000000000 |
| H  | 17.4729899999999999 | 11.8808399999999999 | 7.1691400000000000 |
| H  | 15.4890700000000000 | 8.1959400000000000  | 7.8406600000000000 |
| H  | 17.1524600000000001 | 8.9812600000000001  | 6.9771300000000000 |
| H  | 13.6381999999999999 | 15.7709200000000000 | 7.7242000000000000 |
| H  | 15.2865800000000001 | 14.9987499999999999 | 6.8641200000000000 |
| H  | 4.5490000000000000  | 12.9873600000000001 | 7.0682100000000000 |
| H  | 6.0894600000000000  | 13.7642200000000000 | 5.9817900000000000 |
| H  | 4.9635100000000000  | 8.8509100000000001  | 6.1061800000000000 |
| H  | 4.9433100000000000  | 9.0253999999999999  | 8.1641999999999999 |
| O  | 10.8854200000000000 | 10.9927899999999999 | 8.8588600000000000 |
| N  | 10.7654800000000000 | 12.9928300000000000 | 6.8386800000000000 |
| N  | 10.9417200000000000 | 9.0078800000000000  | 6.8446000000000000 |
| N  | 12.8350800000000000 | 11.0997000000000000 | 6.8699200000000000 |
| N  | 8.9275400000000000  | 10.9789600000000001 | 6.8721300000000000 |



Transition Metal: Co; Functional Group: BH2; Adsorbate: OOH

|    |                    |                    |                   |
|----|--------------------|--------------------|-------------------|
| C  | 10.142130000000000 | 15.250660000000000 | 6.315360000000000 |
| C  | 9.673320000000000  | 13.861590000000000 | 6.480210000000000 |
| C  | 8.339070000000000  | 13.419169999999999 | 6.592390000000000 |
| C  | 11.566150000000000 | 6.729620000000000  | 6.380710000000000 |
| C  | 12.022570000000000 | 8.131520000000000  | 6.485550000000000 |
| C  | 13.334130000000000 | 8.596869999999999  | 6.545510000000000 |
| C  | 10.178940000000001 | 6.771610000000000  | 6.554530000000000 |
| C  | 9.835200000000000  | 8.173450000000001  | 6.678020000000000 |
| C  | 11.536530000000001 | 15.171670000000001 | 6.423070000000000 |
| C  | 8.481930000000000  | 8.550750000000001  | 6.805040000000000 |
| C  | 15.106710000000000 | 11.707950000000000 | 6.822380000000000 |
| C  | 11.873690000000000 | 13.786980000000000 | 6.578930000000000 |
| C  | 13.705200000000000 | 12.172590000000000 | 6.752480000000000 |
| C  | 15.025140000000000 | 10.318519999999999 | 6.709540000000000 |
| C  | 13.625930000000000 | 9.976500000000000  | 6.637570000000000 |
| C  | 13.246400000000000 | 13.490550000000001 | 6.677140000000000 |
| C  | 6.668490000000000  | 11.662720000000000 | 6.791660000000000 |
| C  | 8.062419999999999  | 12.059340000000001 | 6.712760000000000 |
| C  | 6.653320000000000  | 10.273890000000000 | 6.837420000000000 |
| C  | 8.068140000000000  | 9.891159999999999  | 6.795110000000000 |
| B  | 9.412530000000000  | 16.525910000000000 | 5.852580000000000 |
| B  | 6.955940000000000  | 14.231520000000000 | 6.641760000000000 |
| B  | 12.274319999999999 | 5.453770000000000  | 5.896790000000000 |
| B  | 14.699960000000001 | 7.764270000000000  | 6.596790000000000 |
| B  | 9.083740000000001  | 5.634260000000000  | 6.518910000000000 |
| B  | 12.814240000000000 | 16.090280000000000 | 6.369520000000000 |
| B  | 7.445200000000000  | 7.477280000000000  | 6.905900000000000 |
| B  | 16.411320000000000 | 12.423999999999999 | 7.229460000000000 |
| B  | 15.946920000000000 | 9.043010000000001  | 6.714920000000000 |
| B  | 14.087890000000000 | 14.852140000000000 | 6.567490000000000 |
| B  | 5.731510000000000  | 12.920470000000000 | 6.777420000000000 |
| B  | 5.498090000000000  | 9.206310000000000  | 6.884050000000000 |
| Co | 10.856330000000000 | 11.014900000000001 | 6.815370000000000 |
| H  | 8.341480000000001  | 16.506470000000000 | 5.310810000000000 |
| H  | 9.981339999999999  | 17.580909999999999 | 5.971830000000000 |
| H  | 6.207440000000000  | 13.815009999999999 | 7.673010000000000 |
| H  | 6.789530000000000  | 15.413510000000000 | 6.624160000000000 |
| H  | 11.710580000000000 | 4.400410000000000  | 6.065520000000000 |
| H  | 13.311990000000000 | 5.458460000000000  | 5.292770000000000 |
| H  | 14.840109999999999 | 6.579060000000000  | 6.589460000000000 |
| H  | 15.584640000000000 | 8.232480000000001  | 5.699420000000000 |
| H  | 8.992599999999999  | 4.863220000000000  | 7.444800000000000 |
| H  | 8.640670000000000  | 5.269960000000000  | 5.454640000000000 |
| H  | 13.698680000000000 | 15.564570000000000 | 5.497900000000000 |
| H  | 12.895920000000000 | 17.276219999999999 | 6.239140000000000 |
| H  | 6.227770000000000  | 7.687350000000000  | 6.977460000000000 |
| H  | 7.679820000000000  | 6.260570000000000  | 6.983190000000000 |
| H  | 16.422960000000000 | 13.452120000000001 | 7.848800000000000 |
| H  | 17.458480000000002 | 11.879849999999999 | 6.990870000000000 |
| H  | 15.467330000000000 | 8.174020000000001  | 7.622410000000000 |
| H  | 17.138539999999999 | 8.964570000000000  | 6.781900000000000 |
| H  | 13.619400000000001 | 15.781950000000000 | 7.410980000000000 |
| H  | 15.274240000000001 | 14.984680000000001 | 6.586250000000000 |
| H  | 4.538060000000000  | 12.988720000000001 | 6.851430000000000 |
| H  | 6.082730000000000  | 13.737650000000000 | 5.751770000000000 |
| H  | 4.943620000000000  | 8.878349999999999  | 5.861250000000000 |
| H  | 4.923580000000000  | 8.981830000000000  | 7.923470000000000 |
| H  | 9.453419999999999  | 10.630269999999999 | 9.610110000000001 |
| O  | 11.019090000000000 | 11.153969999999999 | 8.674870000000000 |
| O  | 10.303020000000000 | 10.171430000000001 | 9.417180000000000 |
| N  | 10.753430000000000 | 12.982760000000001 | 6.596640000000000 |
| N  | 10.927730000000000 | 8.999350000000000  | 6.622230000000000 |
| N  | 12.824949999999999 | 11.087800000000000 | 6.656070000000000 |
| N  | 8.913259999999999  | 10.968990000000000 | 6.721340000000000 |

Transition Metal: Co; Functional Group: CH3; Adsorbate: Clean

|   |                    |                    |                    |
|---|--------------------|--------------------|--------------------|
| H | 9.323729999999999  | 16.225330000000000 | 9.175319999999999  |
| H | 10.708360000000000 | 17.134950000000000 | 8.565790000000000  |
| H | 9.237080000000000  | 17.028630000000000 | 7.594340000000000  |
| H | 6.619140000000000  | 14.227000000000000 | 7.588880000000000  |
| H | 7.340340000000000  | 14.730449999999999 | 9.126260000000000  |
| H | 7.864250000000000  | 15.448779999999999 | 7.594170000000000  |
| H | 12.396070000000000 | 5.740040000000000  | 9.787599999999999  |
| H | 11.916869999999999 | 4.835020000000000  | 8.343740000000000  |
| H | 13.404489999999999 | 5.783590000000000  | 8.331910000000000  |
| H | 14.711560000000000 | 8.842309999999999  | 10.161550000000000 |
| H | 13.445160000000000 | 7.629410000000000  | 10.331000000000000 |
| H | 14.758139999999999 | 7.375070000000000  | 9.169499999999999  |
| H | 9.611179999999999  | 5.374380000000000  | 6.087050000000000  |
| H | 10.068390000000000 | 4.768270000000000  | 7.686290000000000  |
| H | 8.582240000000000  | 5.699770000000000  | 7.491630000000000  |
| H | 12.244540000000000 | 17.229579999999999 | 7.293190000000000  |
| H | 13.644250000000000 | 16.155909999999999 | 7.126120000000000  |
| H | 12.684200000000000 | 16.601500000000000 | 5.704780000000000  |
| H | 8.565370000000000  | 7.142530000000000  | 5.176270000000000  |
| H | 7.232310000000000  | 7.095420000000000  | 6.342030000000000  |
| H | 7.295780000000000  | 8.363230000000000  | 5.106150000000000  |
| H | 16.376239999999999 | 13.322369999999999 | 6.765940000000000  |
| H | 17.257560000000000 | 11.795690000000000 | 6.841040000000000  |
| H | 16.414899999999999 | 12.254619999999999 | 5.353340000000000  |
| H | 16.555910000000000 | 9.730570000000000  | 9.252879999999999  |
| H | 16.233870000000000 | 8.577439999999999  | 7.946880000000000  |
| H | 17.226790000000000 | 10.003130000000000 | 7.637900000000000  |
| H | 14.852060000000000 | 14.683100000000000 | 5.829270000000000  |
| H | 14.602209999999999 | 13.367430000000000 | 4.670090000000000  |
| H | 13.432490000000000 | 14.682130000000000 | 4.768330000000000  |
| H | 4.873610000000000  | 11.448210000000000 | 8.663679999999999  |
| H | 5.816350000000000  | 12.829400000000000 | 9.226860000000000  |
| H | 5.031310000000000  | 12.876180000000000 | 7.635590000000000  |
| H | 5.789010000000000  | 8.431630000000000  | 7.506980000000000  |
| H | 4.749410000000000  | 9.865970000000000  | 7.473150000000000  |
| H | 5.415760000000000  | 9.229749999999999  | 5.969780000000000  |
| C | 10.473100000000000 | 15.209420000000000 | 7.632230000000000  |
| C | 9.959410000000000  | 13.838110000000000 | 7.676570000000000  |
| C | 8.617330000000000  | 13.433500000000000 | 7.888540000000000  |
| C | 11.585680000000000 | 6.961170000000000  | 8.166589999999999  |
| C | 11.972300000000000 | 8.370889999999999  | 8.204920000000000  |
| C | 13.234500000000000 | 8.884380000000000  | 8.588010000000000  |
| C | 10.401130000000000 | 6.888940000000000  | 7.449650000000000  |
| C | 10.005760000000000 | 8.262980000000000  | 7.149270000000000  |
| C | 11.712389999999999 | 15.156240000000000 | 7.015450000000000  |
| C | 8.745580000000000  | 8.689399999999999  | 6.670980000000000  |
| C | 15.114920000000000 | 11.562030000000000 | 6.965610000000000  |
| C | 12.021310000000000 | 13.747170000000000 | 6.812360000000000  |
| C | 13.720990000000000 | 11.976369999999999 | 6.820360000000000  |
| C | 15.113659999999999 | 10.429980000000000 | 7.766390000000000  |
| C | 13.714790000000000 | 10.088170000000000 | 8.015580000000000  |
| C | 13.258540000000000 | 13.227050000000000 | 6.353370000000000  |
| C | 6.813760000000000  | 11.592150000000000 | 7.740570000000000  |
| C | 8.192200000000000  | 12.089130000000000 | 7.739050000000000  |
| C | 6.844230000000000  | 10.314109999999999 | 7.207530000000000  |
| C | 8.247660000000000  | 9.971209999999999  | 7.015620000000000  |
| C | 9.897380000000000  | 16.453890000000000 | 8.267590000000000  |
| C | 7.559180000000000  | 14.512720000000000 | 8.066400000000000  |
| C | 12.362539999999999 | 5.778210000000000  | 8.686299999999999  |
| C | 14.087270000000000 | 8.136530000000000  | 9.599930000000000  |
| C | 9.629280000000000  | 5.626440000000000  | 7.160420000000000  |
| C | 12.617640000000000 | 16.336700000000000 | 6.773280000000000  |
| C | 7.910620000000000  | 7.769570000000000  | 5.794540000000000  |
| C | 16.344909999999999 | 12.267160000000000 | 6.453350000000000  |
| C | 16.336970000000000 | 9.648770000000000  | 8.175060000000000  |
| C | 14.086100000000000 | 14.037910000000000 | 5.369300000000000  |

|    |                    |                    |                   |
|----|--------------------|--------------------|-------------------|
| C  | 5.580100000000000  | 12.226640000000000 | 8.340170000000001 |
| C  | 5.647800000000000  | 9.414529999999999  | 7.031410000000000 |
| Co | 10.967190000000000 | 11.053540000000000 | 7.400430000000000 |
| N  | 10.973000000000001 | 12.969849999999999 | 7.273940000000000 |
| N  | 10.984349999999999 | 9.133319999999999  | 7.601250000000000 |
| N  | 12.898080000000000 | 11.043640000000000 | 7.434670000000000 |
| N  | 9.042970000000000  | 11.043310000000000 | 7.385790000000000 |

Transition Metal: Co; Functional Group: CH3; Adsorbate: O

|   |                    |                    |                    |
|---|--------------------|--------------------|--------------------|
| H | 9.336349999999999  | 16.153890000000001 | 9.214020000000000  |
| H | 10.736200000000000 | 17.075980000000001 | 8.659509999999999  |
| H | 9.277559999999999  | 17.017260000000000 | 7.663890000000000  |
| H | 6.639590000000000  | 14.208130000000001 | 7.563380000000000  |
| H | 7.364140000000000  | 14.713699999999999 | 9.099140000000000  |
| H | 7.887130000000000  | 15.429510000000001 | 7.565040000000000  |
| H | 12.332810000000000 | 5.789690000000000  | 9.834110000000001  |
| H | 11.882870000000000 | 4.852160000000000  | 8.401520000000000  |
| H | 13.371460000000001 | 5.798660000000000  | 8.398320000000000  |
| H | 14.655040000000000 | 8.898429999999999  | 10.148400000000001 |
| H | 13.387549999999999 | 7.687410000000000  | 10.316599999999999 |
| H | 14.721790000000000 | 7.413540000000000  | 9.183949999999999  |
| H | 9.563110000000000  | 5.350150000000000  | 6.124820000000000  |
| H | 10.029059999999999 | 4.768080000000000  | 7.730870000000000  |
| H | 8.548299999999999  | 5.709080000000000  | 7.531620000000000  |
| H | 12.270619999999999 | 17.218570000000000 | 7.358840000000000  |
| H | 13.669750000000001 | 16.147240000000000 | 7.165860000000000  |
| H | 12.712160000000001 | 16.629890000000000 | 5.755000000000000  |
| H | 8.530530000000001  | 7.122410000000000  | 5.132220000000000  |
| H | 7.214420000000000  | 7.076510000000000  | 6.319660000000000  |
| H | 7.257970000000000  | 8.341139999999999  | 5.077130000000000  |
| H | 16.378779999999999 | 13.357080000000000 | 6.808940000000000  |
| H | 17.272279999999999 | 11.836300000000000 | 6.886030000000000  |
| H | 16.454590000000000 | 12.304180000000001 | 5.386640000000000  |
| H | 16.515450000000001 | 9.787350000000000  | 9.297400000000000  |
| H | 16.229970000000002 | 8.610989999999999  | 8.002940000000001  |
| H | 17.222980000000000 | 10.036170000000000 | 7.694130000000000  |
| H | 14.872010000000000 | 14.703170000000000 | 5.808720000000000  |
| H | 14.624919999999999 | 13.405559999999999 | 4.626420000000000  |
| H | 13.456030000000000 | 14.720359999999999 | 4.740370000000000  |
| H | 4.932790000000000  | 11.429530000000000 | 8.757260000000000  |
| H | 5.890560000000000  | 12.822430000000001 | 9.264889999999999  |
| H | 5.042340000000000  | 12.845530000000000 | 7.705840000000000  |
| H | 5.798840000000000  | 8.413309999999999  | 7.540230000000000  |
| H | 4.758020000000000  | 9.848360000000000  | 7.537650000000000  |
| H | 5.385260000000000  | 9.215199999999999  | 6.015210000000000  |
| C | 10.498290000000001 | 15.190460000000000 | 7.647320000000000  |
| C | 9.979690000000000  | 13.820779999999999 | 7.645350000000000  |
| C | 8.637680000000000  | 13.414300000000001 | 7.857240000000000  |
| C | 11.557750000000000 | 6.972200000000000  | 8.166689999999999  |
| C | 11.951810000000000 | 8.381970000000001  | 8.157410000000000  |
| C | 13.208460000000001 | 8.907880000000000  | 8.546090000000000  |
| C | 10.374370000000001 | 6.882060000000000  | 7.447250000000000  |
| C | 9.989720000000000  | 8.246510000000001  | 7.097810000000000  |
| C | 11.736390000000000 | 15.154940000000000 | 7.023580000000000  |
| C | 8.728840000000000  | 8.671530000000001  | 6.616800000000000  |
| C | 15.128170000000001 | 11.586600000000001 | 6.959840000000000  |
| C | 12.037340000000000 | 13.753170000000001 | 6.767230000000000  |
| C | 13.738099999999999 | 11.989599999999999 | 6.766150000000000  |
| C | 15.107279999999999 | 10.454750000000001 | 7.763180000000000  |
| C | 13.701520000000000 | 10.103780000000000 | 7.965220000000000  |
| C | 13.276630000000001 | 13.241730000000000 | 6.299020000000000  |
| C | 6.832500000000000  | 11.573029999999999 | 7.753250000000000  |
| C | 8.209490000000001  | 12.071050000000000 | 7.706250000000000  |
| C | 6.844120000000000  | 10.296070000000000 | 7.213130000000000  |
| C | 8.239060000000000  | 9.955819999999999  | 6.969520000000000  |
| C | 9.924390000000001  | 16.413360000000001 | 8.324410000000000  |
| C | 7.580920000000000  | 14.494199999999999 | 8.039429999999999  |
| C | 12.322929999999999 | 5.802370000000000  | 8.731629999999999  |
| C | 14.042350000000001 | 8.181680000000000  | 9.588400000000000  |
| C | 9.591939999999999  | 5.619740000000000  | 7.193170000000000  |
| C | 12.644130000000001 | 16.339390000000002 | 6.816380000000000  |
| C | 7.882670000000000  | 7.749280000000000  | 5.758000000000000  |
| C | 16.364220000000000 | 12.304910000000000 | 6.484720000000000  |
| C | 16.322780000000002 | 9.685900000000000  | 8.216320000000000  |
| C | 14.107590000000000 | 14.066860000000000 | 5.333630000000000  |

|    |                    |                    |                   |
|----|--------------------|--------------------|-------------------|
| C  | 5.621430000000000  | 12.207530000000000 | 8.396459999999999 |
| C  | 5.643830000000000  | 9.397100000000000  | 7.070920000000000 |
| Co | 10.971500000000001 | 11.022670000000000 | 7.010240000000000 |
| O  | 10.996869999999999 | 10.865580000000000 | 5.278070000000000 |
| N  | 10.988799999999999 | 12.974320000000001 | 7.206900000000000 |
| N  | 10.970520000000000 | 9.116110000000001  | 7.522050000000000 |
| N  | 12.910670000000000 | 11.053890000000001 | 7.352360000000000 |
| N  | 9.036910000000001  | 11.024710000000001 | 7.320870000000000 |

Transition Metal: Co; Functional Group: CH3; Adsorbate: OH

|   |                     |                     |                     |
|---|---------------------|---------------------|---------------------|
| H | 10.3957200000000001 | 11.5663500000000000 | 5.0695800000000000  |
| H | 9.3259100000000000  | 16.2075400000000002 | 9.1898000000000000  |
| H | 10.7278000000000000 | 17.1149700000000000 | 8.6169400000000000  |
| H | 9.2717500000000001  | 17.0356099999999998 | 7.6198100000000000  |
| H | 6.6308300000000000  | 14.2231400000000001 | 7.5711300000000000  |
| H | 7.3474200000000000  | 14.7440400000000000 | 9.1051400000000000  |
| H | 7.8766200000000000  | 15.4475200000000001 | 7.5673900000000000  |
| H | 12.3572900000000001 | 5.7716700000000000  | 9.8169400000000001  |
| H | 11.8834700000000001 | 4.8521800000000000  | 8.3809700000000000  |
| H | 13.3810199999999999 | 5.7848900000000000  | 8.3710700000000000  |
| H | 14.7037600000000001 | 8.8521000000000000  | 10.1578900000000000 |
| H | 13.4341700000000000 | 7.6418600000000000  | 10.3239699999999999 |
| H | 14.7477500000000000 | 7.3862000000000000  | 9.1637400000000001  |
| H | 9.5923800000000000  | 5.3935800000000000  | 6.0860600000000000  |
| H | 10.0434900000000000 | 4.7866100000000000  | 7.6872900000000000  |
| H | 8.5677100000000000  | 5.7347000000000000  | 7.4904400000000000  |
| H | 12.2761999999999999 | 17.2210500000000002 | 7.3355400000000000  |
| H | 13.6684800000000001 | 16.1393899999999999 | 7.1544000000000000  |
| H | 12.7128800000000000 | 16.6111900000000001 | 5.7385700000000000  |
| H | 8.6000599999999999  | 7.1913700000000000  | 5.1063800000000000  |
| H | 7.2614500000000000  | 7.1188400000000000  | 6.2673000000000000  |
| H | 7.3246600000000000  | 8.4091500000000000  | 5.0530200000000000  |
| H | 16.3740600000000000 | 13.3468100000000000 | 6.7948800000000000  |
| H | 17.2661799999999999 | 11.8259899999999999 | 6.8707200000000000  |
| H | 16.4287199999999998 | 12.2831899999999999 | 5.3791100000000000  |
| H | 16.5472100000000000 | 9.7564800000000000  | 9.2853300000000000  |
| H | 16.2415799999999999 | 8.6003300000000000  | 7.9777800000000000  |
| H | 17.2315000000000000 | 10.0293100000000001 | 7.6761700000000000  |
| H | 14.8533200000000000 | 14.6710600000000001 | 5.7911000000000000  |
| H | 14.5818200000000000 | 13.3546000000000000 | 4.6353200000000000  |
| H | 13.4200900000000000 | 14.6774299999999999 | 4.7467900000000000  |
| H | 4.9133900000000000  | 11.4350900000000001 | 8.7210800000000001  |
| H | 5.8519200000000000  | 12.8344799999999999 | 9.2465300000000000  |
| H | 5.0339100000000000  | 12.8507300000000000 | 7.6707600000000000  |
| H | 5.8301700000000000  | 8.4203800000000000  | 7.5215700000000000  |
| H | 4.7754500000000000  | 9.8447200000000001  | 7.5125300000000000  |
| H | 5.4240400000000000  | 9.2220900000000000  | 5.9945900000000000  |
| C | 10.4907000000000000 | 15.2063799999999999 | 7.6481700000000000  |
| C | 9.9721800000000000  | 13.8388899999999999 | 7.6807000000000000  |
| C | 8.6293300000000000  | 13.4360000000000000 | 7.8842800000000000  |
| C | 11.5751399999999999 | 6.9773600000000000  | 8.1698100000000000  |
| C | 11.9701000000000000 | 8.3861399999999999  | 8.1943600000000000  |
| C | 13.2310099999999999 | 8.8976200000000000  | 8.5804899999999999  |
| C | 10.3979900000000000 | 6.9037500000000000  | 7.4407400000000000  |
| C | 10.0159900000000000 | 8.2765200000000000  | 7.1228800000000000  |
| C | 11.7299100000000000 | 15.1555800000000000 | 7.0282800000000000  |
| C | 8.7659100000000000  | 8.7092899999999999  | 6.6269700000000000  |
| C | 15.1235000000000000 | 11.5785000000000000 | 6.9792200000000000  |
| C | 12.0309399999999999 | 13.7492199999999999 | 6.8071200000000000  |
| C | 13.7303900000000000 | 11.9856099999999999 | 6.8188700000000000  |
| C | 15.1166800000000001 | 10.4481500000000000 | 7.7825800000000000  |
| C | 13.7149500000000000 | 10.1027000000000000 | 8.0152300000000001  |
| C | 13.2614500000000000 | 13.2250599999999999 | 6.3331300000000000  |
| C | 6.8320900000000000  | 11.5888899999999999 | 7.7553400000000000  |
| C | 8.2066400000000000  | 12.0914199999999999 | 7.7426100000000000  |
| C | 6.8616200000000000  | 10.3133400000000000 | 7.2136700000000000  |
| C | 8.2624700000000000  | 9.9805400000000000  | 7.0003900000000000  |
| C | 9.9161000000000000  | 16.4453500000000001 | 8.2952999999999999  |
| C | 7.5694300000000000  | 14.5159100000000000 | 8.0482600000000001  |
| C | 12.3357100000000001 | 5.7952800000000000  | 8.7150000000000000  |
| C | 14.0787499999999999 | 8.1483800000000000  | 9.5950399999999999  |
| C | 9.6137999999999999  | 5.6478000000000000  | 7.1585600000000000  |
| C | 12.6435000000000000 | 16.3327999999999999 | 6.8033600000000000  |
| C | 7.9386100000000000  | 7.8038900000000000  | 5.7320700000000000  |
| C | 16.3527200000000001 | 12.2922600000000001 | 6.4785800000000000  |
| C | 16.3383100000000000 | 9.6721800000000001  | 8.2058300000000001  |

|    |                    |                    |                   |
|----|--------------------|--------------------|-------------------|
| C  | 14.078920000000000 | 14.030430000000001 | 5.339070000000000 |
| C  | 5.604210000000000  | 12.217269999999999 | 8.373139999999999 |
| C  | 5.670650000000000  | 9.404080000000000  | 7.053300000000000 |
| Co | 10.975370000000000 | 11.053540000000000 | 7.246220000000000 |
| O  | 11.018129999999999 | 10.885930000000000 | 5.393940000000000 |
| N  | 10.988429999999999 | 12.971030000000001 | 7.277990000000000 |
| N  | 10.985740000000000 | 9.146080000000000  | 7.581440000000000 |
| N  | 12.904650000000000 | 11.061550000000000 | 7.433180000000000 |
| N  | 9.058059999999999  | 11.045190000000000 | 7.387290000000000 |

Transition Metal: Co; Functional Group: CH3; Adsorbate: OOH

|   |                    |                    |                    |
|---|--------------------|--------------------|--------------------|
| H | 9.298780000000001  | 16.164510000000000 | 9.375109999999999  |
| H | 10.710889999999999 | 17.077410000000000 | 8.835770000000000  |
| H | 9.262480000000000  | 17.028949999999998 | 7.824660000000000  |
| H | 6.617440000000000  | 14.211050000000000 | 7.678590000000000  |
| H | 7.312870000000000  | 14.749950000000000 | 9.216780000000000  |
| H | 7.867720000000000  | 15.432020000000000 | 7.678060000000000  |
| H | 12.318759999999999 | 5.784040000000000  | 10.018680000000000 |
| H | 11.864179999999999 | 4.850570000000000  | 8.585880000000000  |
| H | 13.356780000000001 | 5.791680000000000  | 8.582900000000000  |
| H | 14.661339999999999 | 8.874730000000000  | 10.326700000000001 |
| H | 13.397800000000000 | 7.659250000000000  | 10.494160000000001 |
| H | 14.720490000000000 | 7.401590000000000  | 9.344379999999999  |
| H | 9.536420000000000  | 5.367230000000000  | 6.304230000000000  |
| H | 10.031010000000000 | 4.767910000000000  | 7.894460000000000  |
| H | 8.543410000000000  | 5.702770000000000  | 7.732670000000000  |
| H | 12.264480000000001 | 17.207719999999998 | 7.539040000000000  |
| H | 13.652160000000000 | 16.120560000000001 | 7.351630000000000  |
| H | 12.705539999999999 | 16.613060000000001 | 5.936910000000000  |
| H | 8.528269999999999  | 7.143100000000000  | 5.315480000000000  |
| H | 7.222230000000000  | 7.068970000000000  | 6.511230000000000  |
| H | 7.236370000000000  | 8.344860000000001  | 5.282910000000000  |
| H | 16.342680000000001 | 13.354229999999999 | 6.986590000000000  |
| H | 17.240720000000000 | 11.836090000000000 | 7.045710000000000  |
| H | 16.408570000000001 | 12.310930000000001 | 5.556510000000000  |
| H | 16.500969999999999 | 9.797100000000000  | 9.481579999999999  |
| H | 16.230280000000000 | 8.618420000000000  | 8.186529999999999  |
| H | 17.207820000000002 | 10.055690000000000 | 7.880330000000000  |
| H | 14.827620000000000 | 14.676399999999999 | 5.948280000000000  |
| H | 14.555429999999999 | 13.362760000000000 | 4.789020000000000  |
| H | 13.390390000000000 | 14.682060000000000 | 4.907780000000000  |
| H | 4.904250000000000  | 11.443390000000001 | 8.933100000000000  |
| H | 5.856080000000000  | 12.848520000000001 | 9.417650000000000  |
| H | 5.006000000000000  | 12.843660000000000 | 7.859530000000000  |
| H | 5.794340000000000  | 8.410720000000000  | 7.747210000000000  |
| H | 4.741880000000000  | 9.836639999999999  | 7.741530000000000  |
| H | 5.359110000000000  | 9.194760000000000  | 6.219120000000000  |
| H | 9.365000000000000  | 11.265960000000000 | 4.750240000000000  |
| C | 10.471550000000001 | 15.192729999999999 | 7.821720000000000  |
| C | 9.953780000000000  | 13.822380000000001 | 7.838090000000000  |
| C | 8.608870000000000  | 13.422739999999999 | 8.028370000000001  |
| C | 11.545210000000001 | 6.972080000000000  | 8.356500000000000  |
| C | 11.938390000000000 | 8.381090000000000  | 8.359410000000000  |
| C | 13.199479999999999 | 8.899270000000000  | 8.738810000000001  |
| C | 10.363149999999999 | 6.886620000000000  | 7.635870000000000  |
| C | 9.976990000000001  | 8.254030000000000  | 7.302730000000000  |
| C | 11.710640000000000 | 15.147990000000000 | 7.205000000000000  |
| C | 8.718660000000000  | 8.679110000000000  | 6.817140000000000  |
| C | 15.098190000000001 | 11.579689999999999 | 7.139840000000000  |
| C | 12.011559999999999 | 13.741989999999999 | 6.972280000000000  |
| C | 13.705230000000000 | 11.978400000000001 | 6.961820000000000  |
| C | 15.087800000000000 | 10.452680000000001 | 7.948290000000000  |
| C | 13.685269999999999 | 10.098640000000000 | 8.163830000000001  |
| C | 13.239360000000000 | 13.224750000000000 | 6.488180000000000  |
| C | 6.804070000000000  | 11.580640000000001 | 7.926320000000000  |
| C | 8.180400000000001  | 12.077640000000001 | 7.894940000000000  |
| C | 6.822590000000000  | 10.298730000000001 | 7.398680000000000  |
| C | 8.220940000000001  | 9.958060000000000  | 7.174880000000000  |
| C | 9.898170000000000  | 16.420079999999999 | 8.491560000000000  |
| C | 7.549840000000000  | 14.507529999999999 | 8.166510000000001  |
| C | 12.308330000000000 | 5.798570000000000  | 8.916410000000001  |
| C | 14.044190000000000 | 8.163040000000001  | 9.765370000000001  |
| C | 9.581659999999999  | 5.624360000000000  | 7.375030000000000  |
| C | 12.629810000000001 | 16.323889999999999 | 6.998210000000000  |
| C | 7.877240000000000  | 7.756230000000000  | 5.951920000000000  |
| C | 16.327510000000000 | 12.304020000000000 | 6.655330000000000  |
| C | 16.310549999999999 | 9.694570000000001  | 8.400180000000001  |



|    |                    |                    |                   |
|----|--------------------|--------------------|-------------------|
| C  | 14.053310000000000 | 14.035660000000000 | 5.496270000000000 |
| C  | 5.589020000000000  | 12.218920000000001 | 8.558990000000000 |
| C  | 5.627420000000000  | 9.389130000000000  | 7.270490000000000 |
| Co | 10.945650000000001 | 11.040699999999999 | 7.375920000000000 |
| O  | 11.024229999999999 | 10.764230000000000 | 5.532620000000000 |
| O  | 10.253030000000001 | 11.687790000000000 | 4.741590000000000 |
| N  | 10.970829999999999 | 12.960100000000001 | 7.434940000000000 |
| N  | 10.951480000000000 | 9.130549999999999  | 7.738880000000000 |
| N  | 12.877420000000001 | 11.049099999999999 | 7.563310000000000 |
| N  | 9.022980000000000  | 11.028620000000000 | 7.537320000000000 |

Transition Metal: Co; Functional Group: F; Adsorbate: Clean

|    |                    |                    |                    |
|----|--------------------|--------------------|--------------------|
| Co | 0.000000000000000  | -0.000109965181886 | 0.000524276009998  |
| C  | 0.681577492909118  | 4.237384941309096  | -0.008097484387807 |
| C  | 1.101851218368110  | 2.854153436237326  | -0.006076499916618 |
| C  | 2.421261431806436  | 2.429549328694154  | -0.000590987177066 |
| C  | -0.681586433504197 | -4.237450143081489 | -0.007524253658669 |
| C  | -1.101901071525166 | -2.854231662524395 | -0.003321607470284 |
| C  | -2.421383146175597 | -2.429641010885195 | -0.000481747093568 |
| C  | 0.681586433504196  | -4.237450143081489 | -0.007524253658669 |
| C  | 1.101901071525170  | -2.854231662524395 | -0.003321607470284 |
| C  | -0.681577492909117 | 4.237384941309096  | -0.008097484387807 |
| C  | 2.421383146175602  | -2.429641010885195 | -0.000481747093568 |
| C  | -4.221651425349048 | 0.686556972408146  | 0.004957250189542  |
| C  | -1.101851218368108 | 2.854153436237326  | -0.006076499916618 |
| C  | -2.849915877970663 | 1.106147628306420  | 0.005285258377556  |
| C  | -4.221809099557241 | -0.686318938321524 | 0.004701486489498  |
| C  | -2.850082888427629 | -1.106208168856689 | 0.005142231890914  |
| C  | -2.421261431806442 | 2.429549328694154  | -0.000590987177066 |
| C  | 4.221651425349050  | 0.686556972408146  | 0.004957250189542  |
| C  | 2.849915877970664  | 1.106147628306420  | 0.005285258377556  |
| C  | 4.221809099557240  | -0.686318938321524 | 0.004701486489498  |
| C  | 2.850082888427628  | -1.106208168856689 | 0.005142231890914  |
| N  | 0.000000000000000  | 1.999850565257888  | -0.005741888053396 |
| N  | 0.000000000000000  | -1.999956858851867 | -0.001489794762074 |
| N  | -1.997071124840808 | -0.000078106410420 | 0.006148317378864  |
| N  | 1.997071124840806  | -0.000078106410420 | 0.006148317378864  |
| F  | 5.309071429480628  | -1.475585369756175 | 0.001915690743732  |
| F  | -5.308636107776895 | 1.476169006362696  | 0.002208859962122  |
| F  | -5.309071429480628 | -1.475585369756175 | 0.001915690743732  |
| F  | -1.483491383870668 | 5.317208223615451  | -0.004216747717056 |
| F  | 1.483491383870670  | 5.317208223615451  | -0.004216747717056 |
| F  | 5.308636107776898  | 1.476169006362696  | 0.002208859962122  |
| F  | -1.483448535292450 | -5.317284600853798 | -0.006692513586064 |
| F  | 1.483448535292450  | -5.317284600853798 | -0.006692513586064 |
| F  | -3.386910431444146 | 3.390132272796416  | 0.000027300391166  |
| F  | 3.386910431444146  | 3.390132272796416  | 0.000027300391166  |
| F  | -3.387096151904935 | -3.390185679651982 | -0.003185851013768 |
| F  | 3.387096151904934  | -3.390185679651982 | -0.003185851013768 |

Transition Metal: Co; Functional Group: F; Adsorbate: O

|    |                    |                    |                    |
|----|--------------------|--------------------|--------------------|
| Co | 0.000000000000000  | -0.000501774070820 | 0.439511860568916  |
| C  | 0.685786067003130  | 4.270921665631372  | -0.001872960496446 |
| C  | 1.106554363507490  | 2.888914202317346  | -0.015530422678434 |
| C  | 2.430389154863860  | 2.429292355198998  | -0.014202900631662 |
| C  | -0.685721542112944 | -4.272779226808108 | -0.002125917602866 |
| C  | -1.106361568695370 | -2.890633876756525 | -0.015786202604396 |
| C  | -2.430191570780124 | -2.431051757168692 | -0.014373209612370 |
| C  | 0.685721542112940  | -4.272779226808108 | -0.002125917602866 |
| C  | 1.106361568695372  | -2.890633876756525 | -0.015786202604396 |
| C  | -0.685786067003139 | 4.270921665631372  | -0.001872960496446 |
| C  | 2.430191570780128  | -2.431051757168692 | -0.014373209612370 |
| C  | -4.272287292528560 | 0.684781780389900  | -0.004220938753651 |
| C  | -1.106554363507495 | 2.888914202317346  | -0.015530422678434 |
| C  | -2.890234599144847 | 1.105516672205156  | -0.016062451359407 |
| C  | -4.272494812269816 | -0.686714737307945 | -0.004268827825939 |
| C  | -2.890200196121128 | -1.107291673554293 | -0.016128076067435 |
| C  | -2.430389154863857 | 2.429292355198998  | -0.014202900631662 |
| C  | 4.272287292528568  | 0.684781780389900  | -0.004220938753651 |
| C  | 2.890234599144840  | 1.105516672205156  | -0.016062451359407 |
| C  | 4.272494812269819  | -0.686714737307945 | -0.004268827825939 |
| C  | 2.890200196121130  | -1.107291673554293 | -0.016128076067435 |
| N  | 0.000000000000000  | 2.054315660353932  | -0.035181509765636 |
| N  | 0.000000000000000  | -2.055807554625375 | -0.035406737186886 |
| N  | -2.055501515165723 | -0.000819649780784 | -0.035124071861599 |
| N  | 2.055501515165726  | -0.000819649780784 | -0.035124071861599 |
| F  | 5.359965417520630  | -1.478188599600760 | -0.001706286500864 |
| F  | -5.359549288533428 | 1.476338063043396  | -0.001667811284612 |
| F  | -5.359965417520629 | -1.478188599600760 | -0.001706286500864 |
| F  | -1.477117381243946 | 5.358442079822085  | 0.000353877631084  |
| F  | 1.477117381243948  | 5.358442079822085  | 0.000353877631084  |
| F  | 5.359549288533438  | 1.476338063043396  | -0.001667811284612 |
| F  | -1.477123054101771 | -5.360184453760555 | 0.000250306331316  |
| F  | 1.477123054101774  | -5.360184453760555 | 0.000250306331316  |
| F  | -3.391510235928482 | 3.390614338167460  | 0.000028899086172  |
| F  | 3.391510235928484  | 3.390614338167460  | 0.000028899086172  |
| F  | -3.391516413291786 | -3.392279270527752 | -0.000142489729750 |
| F  | 3.391516413291794  | -3.392279270527752 | -0.000142489729750 |
| O  | 0.000000000000000  | -0.001382154678488 | 2.085105354304592  |

Transition Metal: Co; Functional Group: F; Adsorbate: OH

|    |                    |                    |                    |
|----|--------------------|--------------------|--------------------|
| Co | 0.000000000000000  | 0.003532914510670  | 0.147322936370412  |
| C  | 0.683496943207020  | 4.233296241545370  | 0.005722041839448  |
| C  | 1.104432445086512  | 2.854742353368304  | 0.010979015958224  |
| C  | 2.426350902636066  | 2.425092427599272  | 0.011631786577996  |
| C  | -0.683033484712350 | -4.230547392191603 | 0.002827178464984  |
| C  | -1.101575446280666 | -2.849664952397223 | -0.002052912624684 |
| C  | -2.422638936063585 | -2.418936239597819 | 0.014879423601040  |
| C  | 0.683033484712356  | -4.230547392191603 | 0.002827178464984  |
| C  | 1.101575446280674  | -2.849664952397223 | -0.002052912624684 |
| C  | -0.683496943207022 | 4.233296241545370  | 0.005722041839448  |
| C  | 2.422638936063580  | -2.418936239597819 | 0.014879423601040  |
| C  | -4.238228563548564 | 0.685206240711328  | 0.007669690277344  |
| C  | -1.104432445086513 | 2.854742353368304  | 0.010979015958224  |
| C  | -2.857896175575117 | 1.104913233184716  | -0.004076026988672 |
| C  | -4.236556947378761 | -0.680914168903225 | 0.010848746189114  |
| C  | -2.855047006562529 | -1.098400184155821 | 0.000983654727088  |
| C  | -2.426350902636063 | 2.425092427599272  | 0.011631786577996  |
| C  | 4.238228563548560  | 0.685206240711328  | 0.007669690277344  |
| C  | 2.857896175575116  | 1.104913233184716  | -0.004076026988672 |
| C  | 4.236556947378761  | -0.680914168903225 | 0.010848746189114  |
| C  | 2.855047006562530  | -1.098400184155821 | 0.000983654727088  |
| N  | 0.000000000000000  | 2.003000491099544  | 0.000691792075134  |
| N  | 0.000000000000000  | -2.001610240910978 | -0.027107433154500 |
| N  | -2.007500354658820 | 0.003779307946980  | -0.031448993306647 |
| N  | 2.007500354658820  | 0.003779307946980  | -0.031448993306647 |
| F  | 5.317055740981655  | -1.480759802142579 | 0.005503246565844  |
| F  | -5.320095950980189 | 1.483651507407416  | 0.001708271899696  |
| F  | -5.317055740981655 | -1.480759802142579 | 0.005503246565844  |
| F  | -1.481159799172751 | 5.315391903592076  | -0.010960217055281 |
| F  | 1.481159799172750  | 5.315391903592076  | -0.010960217055281 |
| F  | 5.320095950980192  | 1.483651507407416  | 0.001708271899696  |
| F  | -1.482057640689924 | -5.311632937623244 | -0.006263350296287 |
| F  | 1.482057640689926  | -5.311632937623244 | -0.006263350296287 |
| F  | -3.386146145474143 | 3.388352291776720  | 0.028525396161692  |
| F  | 3.386146145474148  | 3.388352291776720  | 0.028525396161692  |
| F  | -3.383334666796671 | -3.380434985041006 | 0.042989483832698  |
| F  | 3.383334666796668  | -3.380434985041006 | 0.042989483832698  |
| H  | 0.000000000000000  | 0.856202397678692  | 2.316382807498008  |
| O  | 0.000000000000000  | -0.070275252537005 | 2.003407025563156  |

Transition Metal: Co; Functional Group: F; Adsorbate: OOH

|    |                    |                    |                    |
|----|--------------------|--------------------|--------------------|
| Co | -0.000879610980182 | 0.001232206009978  | 0.165048281344990  |
| C  | 0.683970501562494  | 4.240936812524218  | 0.003896090491342  |
| C  | 1.101892333758310  | 2.859570510232148  | 0.000367227267644  |
| C  | 2.423213835902650  | 2.427216089971804  | 0.009053927762402  |
| C  | -0.682185269750821 | -4.230915646262641 | 0.012276719111752  |
| C  | -1.101053772646573 | -2.849799034533692 | 0.010713278719618  |
| C  | -2.421714611839995 | -2.417535000610581 | 0.020232019728754  |
| C  | 0.683696527871612  | -4.230971867086890 | 0.011791618620920  |
| C  | 1.103127881459234  | -2.849917425524641 | 0.009362016674844  |
| C  | -0.682156285217292 | 4.242643539131910  | 0.003152739823444  |
| C  | 2.424361906432544  | -2.418930780427260 | 0.014368224451090  |
| C  | -4.237297960859864 | 0.689384569634310  | 0.000954716057190  |
| C  | -1.103146713183023 | 2.862362540949262  | -0.001260647421222 |
| C  | -2.857725958797054 | 1.110831617339904  | -0.001209980060376 |
| C  | -4.235847887606283 | -0.677616098219779 | 0.003727233529228  |
| C  | -2.855485967704201 | -1.096167010552424 | 0.004596085732396  |
| C  | -2.425018700457432 | 2.432204038223902  | 0.007285547439788  |
| C  | 4.237128830699445  | 0.687456018690052  | 0.000426043204340  |
| C  | 2.856048741737948  | 1.106291548549648  | -0.006767452354673 |
| C  | 4.237176016750260  | -0.678743506395271 | 0.001909706010888  |
| C  | 2.856299991374552  | -1.097678296323409 | -0.003704586989470 |
| N  | -0.001335762776630 | 2.012283075246322  | -0.018911491180136 |
| N  | 0.000990751475828  | -2.002019733163060 | -0.007000309814050 |
| N  | -2.008158915543525 | 0.007349089516436  | -0.011325870130435 |
| N  | 2.008747893808716  | 0.003927704784868  | -0.029682055519949 |
| F  | 5.319047129950626  | -1.477219625777067 | -0.002820350261900 |
| F  | -5.320905248666817 | 1.486086356230182  | -0.007800795736494 |
| F  | -5.317907047790449 | -1.476200432265632 | -0.004281645298718 |
| F  | -1.479375237798088 | 5.325755789570547  | -0.005083412882332 |
| F  | 1.482948949583072  | 5.322183770733796  | -0.003334408759934 |
| F  | 5.318846716085704  | 1.486029162501444  | -0.003170226813790 |
| F  | -1.481468899363605 | -5.312203570572889 | -0.000024086290559 |
| F  | 1.482462896208186  | -5.312389674389467 | -0.001160501171611 |
| F  | -3.387504664822242 | 3.394826759953508  | 0.023745232760870  |
| F  | 3.384981114202148  | 3.389429987508996  | 0.030496190667216  |
| F  | -3.384227014731252 | -3.378808427564515 | 0.036260590392042  |
| F  | 3.386015120865316  | -3.380702965689061 | 0.034149060741832  |
| H  | -1.491048163501873 | -0.072384886847281 | 2.963905347785876  |
| O  | 0.156272848625532  | 0.079366818490836  | 2.033226310182382  |
| O  | -0.779590419516897 | -0.719268535088531 | 2.752706226295098  |

Transition Metal: Co; Functional Group: H; Adsorbate: Clean

|    |                    |                    |                    |
|----|--------------------|--------------------|--------------------|
| Co | 0.000000000000000  | -0.000071483714636 | 0.006950531754042  |
| C  | 0.683728354050244  | 4.224039241054466  | -0.009946648290711 |
| C  | 1.101363985106156  | 2.839683703581576  | -0.004064535392132 |
| C  | 2.429366084304466  | 2.429231467053032  | 0.000480553581304  |
| C  | -0.683789141246514 | -4.224009081931449 | -0.007592673972390 |
| C  | -1.101564832937012 | -2.839732908827798 | 0.000139862318244  |
| C  | -2.429668245739862 | -2.429316918842840 | 0.002360916487830  |
| C  | 0.683789141246520  | -4.224009081931449 | -0.007592673972390 |
| C  | 1.101564832937008  | -2.839732908827798 | 0.000139862318244  |
| C  | -0.683728354050256 | 4.224039241054466  | -0.009946648290711 |
| C  | 2.429668245739868  | -2.429316918842840 | 0.002360916487830  |
| C  | -4.224709246265991 | 0.683846675166218  | 0.004171405521068  |
| C  | -1.101363985106158 | 2.839683703581576  | -0.004064535392132 |
| C  | -2.840271205042910 | 1.101327731150890  | 0.006100413325138  |
| C  | -4.224886709068819 | -0.683685959014312 | 0.004205564785532  |
| C  | -2.840614482460147 | -1.101528902747670 | 0.006594589598254  |
| C  | -2.429366084304473 | 2.429231467053032  | 0.000480553581304  |
| C  | 4.224709246265986  | 0.683846675166218  | 0.004171405521068  |
| C  | 2.840271205042912  | 1.101327731150890  | 0.006100413325138  |
| C  | 4.224886709068822  | -0.683685959014312 | 0.004205564785532  |
| C  | 2.840614482460146  | -1.101528902747670 | 0.006594589598254  |
| N  | 0.000000000000000  | 1.991162193796222  | -0.001108829961780 |
| N  | 0.000000000000000  | -1.991368013637242 | 0.004243985478442  |
| N  | -1.991896334362600 | -0.000199295856364 | 0.008342066781928  |
| N  | 1.991896334362602  | -0.000199295856364 | 0.008342066781928  |
| H  | 5.074432743706097  | -1.363982761823685 | 0.000385870052382  |
| H  | -5.073682542169553 | 1.365046788469428  | 0.000174666177850  |
| H  | -5.074432743706108 | -1.363982761823685 | 0.000385870052382  |
| H  | -1.364741832675243 | 5.073021110207469  | -0.012660953055295 |
| H  | 1.364741832675250  | 5.073021110207469  | -0.012660953055295 |
| H  | 5.073682542169560  | 1.365046788469428  | 0.000174666177850  |
| H  | -1.364619377884114 | -5.073161512338780 | -0.013254200449321 |
| H  | 1.364619377884116  | -5.073161512338780 | -0.013254200449321 |
| H  | -3.201086787553368 | 3.201051335291118  | -0.001793730739626 |
| H  | 3.201086787553374  | 3.201051335291118  | -0.001793730739626 |
| H  | -3.201062627185802 | -3.201282058813355 | -0.001841010365678 |
| H  | 3.201062627185806  | -3.201282058813355 | -0.001841010365678 |

Transition Metal: Co; Functional Group: H; Adsorbate: O

|    |                    |                    |                    |
|----|--------------------|--------------------|--------------------|
| Co | 0.000000000000000  | -0.000672129047754 | 0.308430638567544  |
| C  | 0.684221625024364  | 4.226081385130924  | -0.022518582805461 |
| C  | 1.102913741530416  | 2.841734970254220  | 0.004898731998616  |
| C  | 2.432105379565518  | 2.429723433349330  | 0.013900997576972  |
| C  | -0.684205315548503 | -4.228024727464788 | -0.022436259470197 |
| C  | -1.102973916561908 | -2.843727439303663 | 0.006359386744288  |
| C  | -2.432286210662873 | -2.432034642225087 | 0.013984419710940  |
| C  | 0.684205315548502  | -4.228024727464788 | -0.022436259470197 |
| C  | 1.102973916561910  | -2.843727439303663 | 0.006359386744288  |
| C  | -0.684221625024367 | 4.226081385130924  | -0.022518582805461 |
| C  | 2.432286210662874  | -2.432034642225087 | 0.013984419710940  |
| C  | -4.231761240023847 | 0.683292680971560  | -0.011791634164297 |
| C  | -1.102913741530422 | 2.841734970254220  | 0.004898731998616  |
| C  | -2.846893200953762 | 1.101319032990916  | 0.010610558161976  |
| C  | -4.231971167268838 | -0.685248560719490 | -0.011885327724904 |
| C  | -2.847170193697334 | -1.103666065614178 | 0.010562200547330  |
| C  | -2.432105379565520 | 2.429723433349330  | 0.013900997576972  |
| C  | 4.231761240023854  | 0.683292680971560  | -0.011791634164297 |
| C  | 2.846893200953768  | 1.101319032990916  | 0.010610558161976  |
| C  | 4.231971167268838  | -0.685248560719490 | -0.011885327724904 |
| C  | 2.847170193697334  | -1.103666065614178 | 0.010562200547330  |
| N  | 0.000000000000000  | 2.005422477866288  | 0.010559138239278  |
| N  | 0.000000000000000  | -2.007327898703203 | 0.013626352796786  |
| N  | -2.011173976134046 | -0.001235669920670 | 0.014984350583750  |
| N  | 2.011173976134034  | -0.001235669920670 | 0.014984350583750  |
| H  | 5.081165093340609  | -1.365790262102632 | -0.028400835480145 |
| H  | -5.080544277767441 | 1.364339640505624  | -0.028565125132161 |
| H  | -5.081165093340612 | -1.365790262102632 | -0.028400835480145 |
| H  | -1.365389083767951 | 5.074579407537916  | -0.040968143936077 |
| H  | 1.365389083767952  | 5.074579407537916  | -0.040968143936077 |
| H  | 5.080544277767432  | 1.364339640505624  | -0.028565125132161 |
| H  | -1.365202280585521 | -5.076652342937731 | -0.041795546540378 |
| H  | 1.365202280585536  | -5.076652342937731 | -0.041795546540378 |
| H  | -3.202655052352625 | 3.202190659378256  | 0.012802848631704  |
| H  | 3.202655052352628  | 3.202190659378256  | 0.012802848631704  |
| H  | -3.202543042471476 | -3.204779853314975 | 0.011259644010402  |
| H  | 3.202543042471478  | -3.204779853314975 | 0.011259644010402  |
| O  | 0.000000000000000  | 0.004754256853828  | 2.054250504971068  |

Transition Metal: Co; Functional Group: H; Adsorbate: OH

|    |                    |                    |                    |
|----|--------------------|--------------------|--------------------|
| Co | 0.000000000000000  | 0.002812900979870  | 0.148003883738048  |
| C  | 0.684159124878012  | 4.222150299949842  | -0.001380731506526 |
| C  | 1.102254698354390  | 2.839488800637204  | 0.014229503855644  |
| C  | 2.430089565603152  | 2.428174498334828  | 0.017462445922956  |
| C  | -0.683491785011672 | -4.221830927384518 | -0.003503093099493 |
| C  | -1.099498805780939 | -2.836393285839925 | 0.006626354192350  |
| C  | -2.426524092065460 | -2.425347674528968 | 0.019228732802010  |
| C  | 0.683491785011668  | -4.221830927384518 | -0.003503093099493 |
| C  | 1.099498805780936  | -2.836393285839925 | 0.006626354192350  |
| C  | -0.684159124878004 | 4.222150299949842  | -0.001380731506526 |
| C  | 2.426524092065460  | -2.425347674528968 | 0.019228732802010  |
| C  | -4.225954471692134 | 0.683503985835450  | 0.001155647992912  |
| C  | -1.102254698354386 | 2.839488800637204  | 0.014229503855644  |
| C  | -2.841002400776983 | 1.101166301415486  | 0.003663391830892  |
| C  | -4.223626687974898 | -0.683565284564033 | 0.004035867254290  |
| C  | -2.837779034511740 | -1.098134903684798 | 0.007409280953744  |
| C  | -2.430089565603140 | 2.428174498334828  | 0.017462445922956  |
| C  | 4.225954471692140  | 0.683503985835450  | 0.001155647992912  |
| C  | 2.841002400776992  | 1.101166301415486  | 0.003663391830892  |
| C  | 4.223626687974892  | -0.683565284564033 | 0.004035867254290  |
| C  | 2.837779034511748  | -1.098134903684798 | 0.007409280953744  |
| N  | 0.000000000000000  | 1.990081741256506  | 0.012158658966112  |
| N  | 0.000000000000000  | -1.989897192981292 | -0.004693348813334 |
| N  | -1.992518516163827 | 0.002106641971196  | -0.012015385046324 |
| N  | 1.992518516163834  | 0.002106641971196  | -0.012015385046324 |
| H  | 5.070566097783850  | -1.367102509390932 | 0.000526161849244  |
| H  | -5.075056429018456 | 1.364306542549306  | -0.004881928275836 |
| H  | -5.070566097783855 | -1.367102509390932 | 0.000526161849244  |
| H  | -1.365678315495728 | 5.070597500611126  | -0.017073290370085 |
| H  | 1.365678315495724  | 5.070597500611126  | -0.017073290370085 |
| H  | 5.075056429018452  | 1.364306542549306  | -0.004881928275836 |
| H  | -1.365583650086762 | -5.069868067158643 | -0.013876431763023 |
| H  | 1.365583650086770  | -5.069868067158643 | -0.013876431763023 |
| H  | -3.201261926199066 | 3.200654348954232  | 0.027527635921806  |
| H  | 3.201261926199066  | 3.200654348954232  | 0.027527635921806  |
| H  | -3.198421851566650 | -3.196954303611545 | 0.035002325201606  |
| H  | 3.198421851566656  | -3.196954303611545 | 0.035002325201606  |
| H  | 0.000000000000000  | 0.892350398405750  | 2.289124928013028  |
| O  | 0.000000000000000  | -0.044131775851241 | 2.006762902663170  |



Transition Metal: Co; Functional Group: H; Adsorbate: OOH

|    |                    |                    |                    |
|----|--------------------|--------------------|--------------------|
| Co | -0.000373992436430 | 0.025517527893046  | 0.182552681251728  |
| C  | 0.694891762790590  | 4.251205730206943  | 0.034151548488928  |
| C  | 1.105480054758720  | 2.864471052571320  | 0.024553834902264  |
| C  | 2.431553824802736  | 2.447620990409836  | -0.000936665304132 |
| C  | -0.697795046312240 | -4.192485967144830 | 0.133538234693834  |
| C  | -1.110080498133975 | -2.806436574624371 | 0.096977473564410  |
| C  | -2.435964480137201 | -2.390796873441353 | 0.078091601582012  |
| C  | 0.669147264519270  | -4.197158206209954 | 0.121291688597772  |
| C  | 1.089977418508454  | -2.813546725048603 | 0.076800346918424  |
| C  | -0.672410916660510 | 4.256936951900642  | 0.030020060120440  |
| C  | 2.418171037831152  | -2.406768288566983 | 0.032425122838194  |
| C  | -4.223612860135050 | 0.725495401419106  | -0.063664882811548 |
| C  | -1.094542364396066 | 2.873390056789850  | 0.021499333173898  |
| C  | -2.839523616707687 | 1.140158645734782  | -0.015689145988690 |
| C  | -4.226675678471041 | -0.642768551054679 | -0.041299366829087 |
| C  | -2.844897259037033 | -1.062643966540108 | 0.019235022615752  |
| C  | -2.423930756065399 | 2.467130004548762  | 0.004679740695906  |
| C  | 4.221028133688890  | 0.698282225668696  | -0.101004526161372 |
| C  | 2.838218287953794  | 1.119007847994998  | -0.042604410977828 |
| C  | 4.216923955351552  | -0.668923032880038 | -0.093781639956882 |
| C  | 2.831939760279634  | -1.081146806219731 | -0.029604424649088 |
| N  | 0.002442569814634  | 2.022817696583324  | 0.010264382244422  |
| N  | -0.007485627384980 | -1.965065561551473 | 0.057140043505294  |
| N  | -1.995480424611422 | 0.036454504724320  | 0.018895579266198  |
| N  | 1.989692278832684  | 0.021074683849362  | -0.024304253009980 |
| H  | 5.061544746928938  | -1.353974161247933 | -0.130494882428255 |
| H  | -5.069684786389782 | 1.408114789007604  | -0.113273799296920 |
| H  | -5.076022032445966 | -1.322604970848818 | -0.069198079328601 |
| H  | -1.350762773835356 | 5.107828288563676  | 0.026131503106774  |
| H  | 1.380789007498316  | 5.096066379010161  | 0.035006563010238  |
| H  | 5.069815191454902  | 1.378005624781480  | -0.144017459171614 |
| H  | -1.382294144960202 | -5.038124513653838 | 0.157633408002594  |
| H  | 1.348989048181468  | -5.046885177015545 | 0.133412551544900  |
| H  | -3.193022547026334 | 3.241747667676606  | -0.001955873476136 |
| H  | 3.206041441860560  | 3.216747989567408  | 0.000181806851998  |
| H  | -3.210389689200770 | -3.159795832996011 | 0.097451329344978  |
| H  | 3.188107834491100  | -3.180231483499270 | 0.040313105896892  |
| H  | -1.512453733301211 | -0.054772761486474 | 2.915401164658356  |
| O  | 0.165362631770288  | 0.126164140350488  | 2.046691231456378  |
| O  | -0.759713023668912 | -0.674688745222269 | 2.784180051056968  |

## Transition Metal: Co; Functional Group: NH2; Adsorbate: Clean

|    |                    |                    |                    |
|----|--------------------|--------------------|--------------------|
| Co | 0.028080940350878  | -0.026537708603112 | -0.031634825750839 |
| C  | 0.810437463642112  | 4.075899450030512  | -0.666090887701792 |
| C  | 1.181553479151552  | 2.681097950254828  | -0.611274708164039 |
| C  | 2.492878002367000  | 2.171941752765426  | -0.774788006116157 |
| C  | -0.724526734740255 | -4.151650046353407 | -0.484911248799524 |
| C  | -1.117613728578505 | -2.763180688701656 | -0.444657215718564 |
| C  | -2.409102972768604 | -2.261887152529198 | -0.666975862108941 |
| C  | 0.591946412893924  | -4.211303031378598 | -0.056959202506231 |
| C  | 0.989731379831790  | -2.856286657796801 | 0.261471274397972  |
| C  | -0.460998524695356 | 4.175000402572461  | -0.120754099086014 |
| C  | 2.263778774511868  | -2.466665577541733 | 0.729522227970650  |
| C  | -4.089165187679079 | 0.723022960901620  | 0.553894914683824  |
| C  | -0.916146218274108 | 2.830097153260176  | 0.145848140868508  |
| C  | -2.707661372540645 | 1.141475889405324  | 0.447035321305972  |
| C  | -4.151441883217295 | -0.590332824163625 | 0.113897715141086  |
| C  | -2.801907616424970 | -0.979949903407032 | -0.214407049775005 |
| C  | -2.238760229542905 | 2.475962186367108  | 0.506412559400686  |
| C  | 4.205315046898122  | 0.540024716216348  | 0.137822075756486  |
| C  | 2.863092260691070  | 0.904895509835314  | -0.284573105118579 |
| C  | 4.111947434672288  | -0.713639665891144 | 0.720359184568798  |
| C  | 2.738828562063088  | -1.150108737101398 | 0.570751048491098  |
| N  | 0.113121264135598  | 1.929131727628154  | -0.133759989803377 |
| N  | -0.055155016482772 | -1.978140522185473 | 0.009760951339398  |
| N  | -1.923719970850964 | 0.064029025199426  | 0.046649068416676  |
| N  | 1.978110087785814  | -0.122720677944372 | 0.013811903807624  |
| N  | 5.194342299720613  | -1.479216901721209 | 1.286509345248264  |
| N  | -5.198265988205158 | 1.536241192033358  | 0.967917074061624  |
| N  | -5.322199158486765 | -1.376849012703559 | 0.017980044814466  |
| N  | -1.187802165968801 | 5.379178507017520  | 0.063989843592412  |
| N  | 1.649710172752188  | 5.165160471607843  | -1.105234812240433 |
| N  | 5.374731533460299  | 1.298323448645620  | 0.001213454884192  |
| N  | -1.508790672017010 | -5.269992433933790 | -0.884466360192572 |
| N  | 1.355487358998346  | -5.399817097617735 | 0.035929401189822  |
| N  | -3.144205366167604 | 3.494873550889032  | 0.856229874775230  |
| N  | 3.526852496558958  | 3.016400960598202  | -1.268915271745254 |
| N  | -3.401766083806780 | -3.107369976977566 | -1.243242386240727 |
| N  | 3.129187294870574  | -3.491390796005614 | 1.211417470408716  |
| H  | -2.455583149494522 | -5.229727840980162 | -0.497039932699465 |
| H  | -1.077691301743513 | -6.136702840500632 | -0.551001089340044 |
| H  | -2.991952965082380 | -3.804813934462807 | -1.866887285298201 |
| H  | -4.100378333725494 | -2.571436969128598 | -1.760495023757041 |
| H  | -5.357393495902249 | 1.509327369422184  | 1.980502485343050  |
| H  | -6.065336269751157 | 1.264988058772118  | 0.498702833773348  |
| H  | -1.510510172553239 | 5.498013817600932  | 1.028215578249288  |
| H  | 1.238007804171548  | 5.669172585307354  | -1.896125929384024 |
| H  | 1.826749286666668  | 5.846321405872020  | -0.359270949814402 |
| H  | 3.164642886999406  | 3.947664934529398  | -1.506064293836303 |
| H  | 4.025332986294014  | 2.599028249408306  | -2.057114252425873 |
| H  | 5.175234784888980  | 2.286995912645566  | -0.179464181784589 |
| H  | 6.032955383372078  | 1.166206600152784  | 0.770640569161356  |
| H  | 6.044284218799586  | -1.393538716039188 | 0.720732038587452  |
| H  | 5.427348504754864  | -1.173508677694414 | 2.237673844104294  |
| H  | 4.062435026977064  | -3.115114573738623 | 1.419460559476686  |
| H  | 2.743367261453402  | -3.968691516896822 | 2.029234435945488  |
| H  | 2.339013313523680  | -5.176998525012195 | 0.223389481676632  |
| H  | 1.291185662743632  | -5.959347980057732 | -0.818510261807532 |
| H  | -5.135426938763171 | -2.377501414892773 | 0.110136372300976  |
| H  | -6.024985181394962 | -1.096459372604798 | 0.705574007758784  |
| H  | -4.117252172146840 | 3.167177149664394  | 0.830487662021418  |
| H  | -3.012547261645928 | 4.351040916914522  | 0.314579594984320  |
| H  | -0.621145112469982 | 6.191283436027394  | -0.192989343230593 |

Transition Metal: Co; Functional Group: NH2; Adsorbate: O

|    |                    |                    |                    |
|----|--------------------|--------------------|--------------------|
| Co | 0.030287473773718  | 0.005554567715906  | 0.508384752201248  |
| C  | 0.871233824411858  | 4.150780380788980  | -0.719658130523875 |
| C  | 1.230831373733880  | 2.764995303562004  | -0.504225922842657 |
| C  | 2.560916665017356  | 2.249138237185270  | -0.459474329992680 |
| C  | -0.788126954990055 | -4.170478649692313 | -0.634962222327328 |
| C  | -1.183276228616414 | -2.820573336365243 | -0.291026363613508 |
| C  | -2.516104543272327 | -2.331800775694791 | -0.182917662899150 |
| C  | 0.584806385815298  | -4.245952976707857 | -0.435813713901403 |
| C  | 1.005157007500616  | -2.931144198061723 | 0.009241657532652  |
| C  | -0.485885947100360 | 4.253094842086788  | -0.448373133043820 |
| C  | 2.332693023816586  | -2.566317486188996 | 0.373826069065420  |
| C  | -4.135968642918646 | 0.833292901267356  | 0.610710238936174  |
| C  | -0.954586691839182 | 2.912633194575810  | -0.159452922999513 |
| C  | -2.776032028800710 | 1.217375366122684  | 0.300790914224516  |
| C  | -4.188177706692555 | -0.551507861166716 | 0.539734306640260  |
| C  | -2.864078121489346 | -0.995181627186522 | 0.159263128880744  |
| C  | -2.310654613671531 | 2.549780766938868  | 0.101741814551208  |
| C  | 4.227427018627100  | 0.548966850329524  | 0.446842236049734  |
| C  | 2.912451266911226  | 0.941839738120408  | -0.024835649798597 |
| C  | 4.153382446517816  | -0.806980171896551 | 0.736610432239512  |
| C  | 2.808284187788448  | -1.228902865803956 | 0.418027431142656  |
| N  | 0.108680915254038  | 2.031217214039448  | -0.181167156478168 |
| N  | -0.075060074346709 | -2.074583470239261 | 0.048606441661052  |
| N  | -2.003510408267534 | 0.090174759470716  | 0.078546760707898  |
| N  | 2.051967130705514  | -0.143596717250063 | 0.003534117168812  |
| N  | 5.217305356621946  | -1.638237402851566 | 1.245581035409362  |
| N  | -5.241261956042933 | 1.710667596910706  | 0.877806518448510  |
| N  | -5.338644494460521 | -1.337857687024680 | 0.775105975098366  |
| N  | -1.250769440469615 | 5.448792793867908  | -0.494239359332415 |
| N  | 1.761553823646590  | 5.228826396122393  | -1.086360995267537 |
| N  | 5.376801313973468  | 1.349397175641684  | 0.583577959238232  |
| N  | -1.653673026896815 | -5.236399714675962 | -1.084404214324525 |
| N  | 1.376776069575710  | -5.394920590036701 | -0.617927933707087 |
| N  | -3.254289256346425 | 3.573256235237580  | 0.158618013600824  |
| N  | 3.610739469500572  | 3.127057494825580  | -0.745208351068733 |
| N  | -3.554905467858099 | -3.249125038472091 | -0.354054742339606 |
| N  | 3.245536318822054  | -3.601545255075521 | 0.598933994287820  |
| H  | -1.488288205790685 | -6.100614774165471 | -0.558722517800806 |
| H  | -1.519051843286363 | -5.450911268746752 | -2.078708228990372 |
| H  | -3.241352122861926 | -4.162225192275846 | -0.706528469142434 |
| H  | -4.396480894065499 | -2.886967039401100 | -0.798221388266484 |
| H  | -5.294104739468237 | 2.002525441167054  | 1.859428186043706  |
| H  | -6.134486920087260 | 1.284541053162556  | 0.620412704988302  |
| H  | -1.738103490235343 | 5.629424913021927  | 0.388450637202450  |
| H  | 1.464667414434210  | 5.691945200153715  | -1.950381597514962 |
| H  | 1.826795522313522  | 5.945181658719262  | -0.354940228242953 |
| H  | 3.303733820169348  | 4.040899535995420  | -1.098933594599085 |
| H  | 4.403739022842886  | 2.716502785623982  | -1.233517891643640 |
| H  | 5.161740455249790  | 2.336197667534992  | 0.737988422713860  |
| H  | 6.009412561182646  | 0.999479460680056  | 1.305476207982874  |
| H  | 6.105849874770360  | -1.445717467963863 | 0.773274782719474  |
| H  | 5.364613829388886  | -1.500101099137449 | 2.251548065904616  |
| H  | 4.159126806159306  | -3.272415314722029 | 0.934638304235330  |
| H  | 2.875190938959386  | -4.403830961961352 | 1.106019782103402  |
| H  | 2.350661594121852  | -5.182855072499395 | -0.841687361318986 |
| H  | 0.978392927876356  | -6.042305138082554 | -1.300547691798879 |
| H  | -5.106956094816852 | -2.278839645890407 | 1.099741506572944  |
| H  | -5.969996721335587 | -0.891108738423661 | 1.444286917055672  |
| H  | -4.226380824914834 | 3.246436887501640  | 0.166225803895024  |
| H  | -3.667966098068101 | 4.369091138158220  | -0.450951613970886 |
| H  | -0.654109515468580 | 6.254314239032076  | -0.701081353762898 |
| O  | 0.081785375877714  | 0.143465515932862  | 2.179744912041712  |

Transition Metal: Co; Functional Group: NH2; Adsorbate: OH

|    |                    |                    |                    |
|----|--------------------|--------------------|--------------------|
| Co | 0.018906477911454  | -0.014654081671711 | 0.162097407808420  |
| C  | 0.758448569684356  | 4.062736555747724  | -0.700327032263985 |
| C  | 1.144857415412336  | 2.672385899556636  | -0.621966331857355 |
| C  | 2.462525573873570  | 2.175392629144630  | -0.784495265895814 |
| C  | -0.727988889677992 | -4.144052252286217 | -0.452492010993247 |
| C  | -1.119773373298422 | -2.752236512978619 | -0.433113024421729 |
| C  | -2.406789202865966 | -2.252144004318769 | -0.685143683472177 |
| C  | 0.579642462011674  | -4.202106541871720 | -0.007591996443143 |
| C  | 0.972437974266400  | -2.839342176930320 | 0.301461399240680  |
| C  | -0.489370638157812 | 4.165721581298206  | -0.102404995366513 |
| C  | 2.245948832916734  | -2.444092991506523 | 0.769379857010166  |
| C  | -4.102133980608027 | 0.722721183805508  | 0.541725887486264  |
| C  | -0.919174855727004 | 2.823228231059190  | 0.213797498834308  |
| C  | -2.717578420279800 | 1.131873430432024  | 0.471052148754124  |
| C  | -4.164678514190536 | -0.576930120332801 | 0.059641750616544  |
| C  | -2.809824998184013 | -0.963931104157044 | -0.254984175247095 |
| C  | -2.235122084354348 | 2.456842991880190  | 0.609077611298568  |
| C  | 4.196015987031696  | 0.548430997778332  | 0.105062731401556  |
| C  | 2.848877299219034  | 0.911251121543470  | -0.295476961843516 |
| C  | 4.113242161565703  | -0.709412940373245 | 0.684393503020334  |
| C  | 2.739061630730422  | -1.140236586405667 | 0.559804189428604  |
| N  | 0.092116074179180  | 1.924953496530522  | -0.100124031034419 |
| N  | -0.058302998036780 | -1.964172941566787 | 0.012839458218656  |
| N  | -1.937353592515379 | 0.076254992279660  | 0.0273067455763134 |
| N  | 1.971252993334492  | -0.126477861438389 | -0.000939831000658 |
| N  | 5.199435354650134  | -1.478434853688412 | 1.239919242138318  |
| N  | -5.212069652472366 | 1.532367277001734  | 0.964606267542572  |
| N  | -5.338305106921464 | -1.350711272761732 | -0.078082906515626 |
| N  | -1.239899857949698 | 5.364355322209001  | 0.077200949261354  |
| N  | 1.566526327631934  | 5.140508071043321  | -1.217239673121860 |
| N  | 5.365277504230898  | 1.303617479613302  | -0.055794904847184 |
| N  | -1.519923032872580 | -5.257775713577127 | -0.867497964567427 |
| N  | 1.354184005219320  | -5.385778292428153 | 0.089068085489706  |
| N  | -3.113140555048272 | 3.446715685028420  | 1.038836767831646  |
| N  | 3.478643648929300  | 3.029938376077510  | -1.274245432677397 |
| N  | -3.387574647732016 | -3.098688730483758 | -1.263164644334097 |
| N  | 3.094719548544718  | -3.448881713146619 | 1.292855851403604  |
| H  | -2.426997017752818 | -5.268340896270114 | -0.390383241730184 |
| H  | -1.047240901896647 | -6.129962235242081 | -0.614781747432712 |
| H  | -2.975706037198961 | -3.859238563560872 | -1.807042286408610 |
| H  | -4.054271885161985 | -2.580785573498488 | -1.837001724502432 |
| H  | -5.429704509123138 | 1.414018948570424  | 1.959976538850286  |
| H  | -6.057809149335123 | 1.327757414092542  | 0.426682174563008  |
| H  | -1.324649946087820 | 5.620238200974800  | 1.066386005043368  |
| H  | 1.190582807815872  | 5.513822993500294  | -2.094337677015986 |
| H  | 1.638314526055916  | 5.919029233617058  | -0.554568373954481 |
| H  | 3.113099123807680  | 3.953090969993932  | -1.534483260800766 |
| H  | 4.040002359462590  | 2.606599978770164  | -2.013837956958980 |
| H  | 5.176611955533664  | 2.303428323340872  | -0.163840931066584 |
| H  | 6.062838001143493  | 1.119500917936640  | 0.666430312629254  |
| H  | 6.018696976204150  | -1.471662544337850 | 0.624297279976540  |
| H  | 5.498380042399872  | -1.117059964403374 | 2.152103009820598  |
| H  | 4.024710746636832  | -3.078002689399870 | 1.520948875802432  |
| H  | 2.679352420567874  | -3.946016557853678 | 2.082150783671216  |
| H  | 2.333389520863084  | -5.157281519110665 | 0.287192797893712  |
| H  | 1.311884047500268  | -5.938721457294957 | -0.770972994954921 |
| H  | -5.160450714484144 | -2.354631376451625 | -0.005123152349858 |
| H  | -6.053258591893439 | -1.077538825586558 | 0.599761616548420  |
| H  | -4.096011010992395 | 3.151415651839664  | 1.008033565822890  |
| H  | -2.937456472198182 | 4.367007118273216  | 0.631564688004526  |
| H  | -0.797801294352688 | 6.148502526855641  | -0.409833847668928 |
| H  | 0.705288240993236  | 0.691363836108856  | 2.283154259822678  |
| O  | 0.005349461921980  | 0.051545598563768  | 2.048515414486646  |

## Transition Metal: Co; Functional Group: NH2; Adsorbate: OOH

|    |                    |                    |                    |
|----|--------------------|--------------------|--------------------|
| Co | 0.021085337479000  | -0.019437146786917 | 0.191367195485256  |
| C  | 0.755737110467684  | 4.059402916069340  | -0.713395482083438 |
| C  | 1.139987502646070  | 2.668295487683958  | -0.624806379101933 |
| C  | 2.458226763832572  | 2.169631950755692  | -0.781531704678915 |
| C  | -0.727266465407354 | -4.142093260707174 | -0.448598544634681 |
| C  | -1.117371572941916 | -2.749726433895550 | -0.414087685039771 |
| C  | -2.404358056579603 | -2.247720938894396 | -0.659461701843234 |
| C  | 0.584296936652654  | -4.205499114951387 | -0.017707912724561 |
| C  | 0.982416287191790  | -2.845619381070602 | 0.298560494232770  |
| C  | -0.488673488140279 | 4.167794517667436  | -0.110204780907260 |
| C  | 2.261022162235320  | -2.454978007021154 | 0.756026707593298  |
| C  | -4.102684394029181 | 0.730901647609356  | 0.566640507700354  |
| C  | -0.917824904184947 | 2.827450883327686  | 0.216806678252580  |
| C  | -2.717425645618668 | 1.141313074625508  | 0.496412949654506  |
| C  | -4.163351455919608 | -0.571058626563342 | 0.085357938622782  |
| C  | -2.809001315374640 | -0.958975726686489 | -0.227643108754844 |
| C  | -2.230751465862436 | 2.467073587365304  | 0.625982312252290  |
| C  | 4.196449703197080  | 0.549240464326082  | 0.107942725312996  |
| C  | 2.846058877064478  | 0.907711566339332  | -0.288459067611239 |
| C  | 4.120520583202948  | -0.713255443628917 | 0.676530891094516  |
| C  | 2.748069518773636  | -1.148254610035618 | 0.552454740449178  |
| N  | 0.090349828086312  | 1.927209744939770  | -0.095963647060657 |
| N  | -0.050607548599523 | -1.967688807727754 | 0.030242483596190  |
| N  | -1.937320756701922 | 0.081434371330310  | 0.054572251465676  |
| N  | 1.975119362900362  | -0.134068317983157 | 0.002161902495104  |
| N  | 5.210888876051940  | -1.481109085580204 | 1.224022285652718  |
| N  | -5.218655697638852 | 1.549298050138802  | 0.959486215730026  |
| N  | -5.337413593989560 | -1.340993959654334 | -0.060708517530074 |
| N  | -1.239270190757683 | 5.367210020283774  | 0.068351267299560  |
| N  | 1.563854787279802  | 5.133198959312454  | -1.238088843335262 |
| N  | 5.362177500520964  | 1.311432040458784  | -0.044779788486768 |
| N  | -1.525525606280034 | -5.251544769995833 | -0.862565436192813 |
| N  | 1.357596395545356  | -5.390295211044865 | 0.062606059127340  |
| N  | -3.105021296924960 | 3.459172565621506  | 1.062545863978734  |
| N  | 3.474128368534288  | 3.020358237097948  | -1.276825978160552 |
| N  | -3.387772839619732 | -3.089968573896073 | -1.243451072473036 |
| N  | 3.114982907393478  | -3.464642948277920 | 1.264456892001456  |
| H  | -2.427894059352937 | -5.261681272234981 | -0.376272047162018 |
| H  | -1.052150113938911 | -6.125960818194718 | -0.618349777352080 |
| H  | -2.974902219337821 | -3.852070990350128 | -1.785155753929512 |
| H  | -4.041227236621683 | -2.566134067323329 | -1.827366983897466 |
| H  | -5.472472045074856 | 1.431359163107604  | 1.946080572439100  |
| H  | -6.048569617266109 | 1.353318952968386  | 0.393556675237754  |
| H  | -1.295255638391154 | 5.639235268102905  | 1.055372998207886  |
| H  | 1.190772163035238  | 5.498092956267756  | -2.119837017805786 |
| H  | 1.631787820196160  | 5.917405272624372  | -0.581776748480689 |
| H  | 3.109738623714852  | 3.941879776891008  | -1.543811236212239 |
| H  | 4.037439321558288  | 2.590962046705294  | -2.011377789122623 |
| H  | 5.167406950943052  | 2.310081825356582  | -0.153650840626540 |
| H  | 6.053857538811924  | 1.131545834454558  | 0.684282392646022  |
| H  | 6.036397657640844  | -1.446217339031620 | 0.617668878839794  |
| H  | 5.493842351876316  | -1.137233687964279 | 2.148193670577644  |
| H  | 4.048317355404862  | -3.094247790914480 | 1.480040498750082  |
| H  | 2.711282538886616  | -3.956528680637049 | 2.063470430175240  |
| H  | 2.337705322088782  | -5.165575277207637 | 0.261312647210552  |
| H  | 1.311408069139426  | -5.933728089580745 | -0.803151063016006 |
| H  | -5.162269852052017 | -2.346419565973829 | -0.005613110502569 |
| H  | -6.055371927809448 | -1.075106287439684 | 0.616424481154722  |
| H  | -4.089185499367979 | 3.169149314726898  | 1.023077611574922  |
| H  | -2.923098021532752 | 4.379085205783836  | 0.655479212870408  |
| H  | -0.811351948060867 | 6.143712333809658  | -0.442926285033348 |
| H  | -1.592566315073771 | -0.200218378597722 | 2.837702824654002  |
| O  | 0.102290754665190  | 0.194046035564108  | 2.066312818249540  |
| O  | -0.745788175801032 | -0.698844122961514 | 2.826699616773314  |

Transition Metal: Co; Functional Group: OH; Adsorbate: Clean

|    |                    |                    |                   |
|----|--------------------|--------------------|-------------------|
| H  | 9.359200000000000  | 16.802720000000001 | 8.084840000000000 |
| H  | 8.023410000000000  | 15.181770000000000 | 6.970730000000000 |
| H  | 12.339589999999999 | 5.428830000000000  | 6.373250000000000 |
| H  | 14.013249999999999 | 6.808910000000000  | 7.259030000000000 |
| H  | 10.122339999999999 | 4.905800000000000  | 7.997970000000000 |
| H  | 11.979680000000000 | 17.095559999999999 | 7.618570000000000 |
| H  | 6.786110000000000  | 8.016800000000000  | 8.681469999999999 |
| H  | 17.079210000000000 | 11.990209999999999 | 8.346970000000001 |
| H  | 16.043209999999998 | 8.659599999999999  | 7.561550000000000 |
| H  | 15.206610000000000 | 14.030360000000000 | 8.675570000000000 |
| H  | 5.959120000000000  | 13.327140000000000 | 7.300940000000000 |
| H  | 4.915060000000000  | 10.024340000000000 | 8.206080000000000 |
| C  | 10.335509999999999 | 15.190680000000000 | 7.558560000000000 |
| C  | 9.930780000000000  | 13.814190000000000 | 7.542900000000000 |
| C  | 8.613840000000000  | 13.377969999999999 | 7.369160000000000 |
| C  | 11.645970000000000 | 6.837650000000000  | 7.539520000000000 |
| C  | 12.066340000000000 | 8.210179999999999  | 7.566550000000000 |
| C  | 13.394439999999999 | 8.635350000000001  | 7.472140000000000 |
| C  | 10.324840000000000 | 6.794330000000000  | 7.920540000000000 |
| C  | 9.909200000000000  | 8.169490000000000  | 8.090260000000001 |
| C  | 11.669169999999999 | 15.235020000000000 | 7.892900000000000 |
| C  | 8.594200000000001  | 8.595290000000000  | 8.335780000000000 |
| C  | 15.177289999999999 | 11.663770000000000 | 8.220860000000000 |
| C  | 12.087339999999999 | 13.861649999999999 | 8.068339999999999 |
| C  | 13.808690000000000 | 12.104450000000000 | 8.199050000000000 |
| C  | 15.192810000000000 | 10.329070000000000 | 7.892180000000000 |
| C  | 13.816200000000000 | 9.942460000000001  | 7.717190000000000 |
| C  | 13.402220000000000 | 13.441020000000000 | 8.326029999999999 |
| C  | 6.807440000000000  | 11.680709999999999 | 7.742480000000000 |
| C  | 8.187630000000000  | 12.072480000000001 | 7.615290000000000 |
| C  | 6.818190000000000  | 10.361190000000001 | 8.129370000000000 |
| C  | 8.189100000000000  | 9.929449999999999  | 8.173260000000001 |
| Co | 11.000750000000000 | 11.013450000000001 | 7.883160000000000 |
| O  | 9.501790000000000  | 16.289570000000001 | 7.265410000000000 |
| O  | 7.616540000000000  | 14.286460000000000 | 7.022890000000000 |
| O  | 12.475949999999999 | 5.721650000000000  | 7.295560000000000 |
| O  | 14.406549999999999 | 7.710550000000000  | 7.216340000000000 |
| O  | 9.537710000000001  | 5.685050000000000  | 8.075650000000000 |
| O  | 12.461530000000000 | 16.346950000000000 | 8.020780000000000 |
| O  | 7.682880000000000  | 7.621690000000000  | 8.659630000000000 |
| O  | 16.254970000000000 | 12.491479999999999 | 8.490900000000000 |
| O  | 16.330939999999998 | 9.570410000000001  | 7.787520000000000 |
| O  | 14.309160000000000 | 14.422599999999999 | 8.639820000000000 |
| O  | 5.670550000000000  | 12.430059999999999 | 7.573970000000000 |
| O  | 5.737240000000000  | 9.539780000000000  | 8.407220000000001 |
| N  | 11.012359999999999 | 12.995799999999999 | 7.849190000000000 |
| N  | 10.987240000000000 | 9.031820000000000  | 7.871280000000000 |
| N  | 12.966360000000000 | 11.029920000000001 | 7.906990000000000 |
| N  | 9.035460000000000  | 10.999280000000001 | 7.876230000000000 |

Transition Metal: Co; Functional Group: OH; Adsorbate: O

|    |                    |                    |                   |
|----|--------------------|--------------------|-------------------|
| H  | 9.372120000000001  | 16.812280000000001 | 7.384940000000000 |
| H  | 8.027810000000001  | 15.184310000000000 | 6.304720000000000 |
| H  | 12.335929999999999 | 5.443670000000000  | 5.656520000000000 |
| H  | 14.000760000000000 | 6.807480000000000  | 6.568190000000000 |
| H  | 10.102589999999999 | 4.903350000000000  | 7.267880000000000 |
| H  | 11.998699999999999 | 17.088880000000000 | 6.888270000000000 |
| H  | 6.798640000000000  | 8.029389999999999  | 8.038869999999999 |
| H  | 17.075489999999999 | 11.986960000000000 | 7.677590000000000 |
| H  | 16.047380000000000 | 8.657760000000000  | 6.857320000000000 |
| H  | 15.196470000000000 | 14.016060000000000 | 8.020940000000000 |
| H  | 5.956980000000000  | 13.328680000000000 | 6.607140000000000 |
| H  | 4.917720000000000  | 10.022600000000001 | 7.518520000000000 |
| C  | 10.333880000000001 | 15.191190000000001 | 6.872390000000000 |
| C  | 9.932359999999999  | 13.813910000000000 | 6.854210000000000 |
| C  | 8.617130000000000  | 13.374100000000000 | 6.668860000000000 |
| C  | 11.645360000000000 | 6.836870000000000  | 6.844360000000000 |
| C  | 12.062840000000000 | 8.210630000000000  | 6.866170000000000 |
| C  | 13.390450000000000 | 8.638270000000000  | 6.757760000000000 |
| C  | 10.325600000000000 | 6.791940000000000  | 7.234120000000000 |
| C  | 9.914940000000000  | 8.167650000000000  | 7.410130000000000 |
| C  | 11.669230000000001 | 15.236990000000000 | 7.202850000000000 |
| C  | 8.599600000000001  | 8.598560000000001  | 7.654630000000000 |
| C  | 15.175860000000000 | 11.663440000000000 | 7.502380000000000 |
| C  | 12.084360000000000 | 13.862880000000001 | 7.377460000000000 |
| C  | 13.809300000000000 | 12.106019999999999 | 7.463270000000000 |
| C  | 15.192280000000000 | 10.330710000000000 | 7.166760000000000 |
| C  | 13.815270000000000 | 9.950180000000000  | 6.971250000000000 |
| C  | 13.399570000000001 | 13.437189999999999 | 7.630920000000000 |
| C  | 6.809590000000000  | 11.676980000000000 | 7.027200000000000 |
| C  | 8.191380000000001  | 12.061940000000000 | 6.880050000000000 |
| C  | 6.820440000000000  | 10.358969999999999 | 7.417580000000000 |
| C  | 8.190289999999999  | 9.924490000000000  | 7.445480000000000 |
| Co | 11.000480000000000 | 11.015590000000000 | 7.376860000000000 |
| O  | 10.991660000000000 | 11.032660000000000 | 9.106249999999999 |
| O  | 9.499140000000001  | 16.285959999999999 | 6.571370000000000 |
| O  | 7.621470000000000  | 14.287200000000000 | 6.348380000000000 |
| O  | 12.473480000000000 | 5.724970000000000  | 6.582300000000000 |
| O  | 14.397560000000000 | 7.708690000000000  | 6.524860000000000 |
| O  | 9.530120000000000  | 5.688270000000000  | 7.373070000000000 |
| O  | 12.468340000000000 | 16.344619999999999 | 7.312480000000000 |
| O  | 7.697440000000000  | 7.637330000000000  | 8.016069999999999 |
| O  | 16.247879999999999 | 12.490480000000000 | 7.790260000000000 |
| O  | 16.330079999999999 | 9.572110000000000  | 7.072180000000000 |
| O  | 14.298349999999999 | 14.407800000000000 | 7.976870000000000 |
| O  | 5.672550000000000  | 12.424780000000000 | 6.859510000000000 |
| O  | 5.743360000000000  | 9.535190000000000  | 7.697000000000000 |
| N  | 11.016780000000001 | 13.001609999999999 | 7.147960000000000 |
| N  | 10.983790000000001 | 9.025119999999999  | 7.171720000000000 |
| N  | 12.971850000000000 | 11.045430000000000 | 7.123010000000000 |
| N  | 9.033620000000001  | 10.978190000000000 | 7.101090000000000 |

Transition Metal: Co; Functional Group: OH; Adsorbate: OH

|    |                    |                    |                   |
|----|--------------------|--------------------|-------------------|
| H  | 11.325270000000000 | 10.204250000000000 | 9.379830000000000 |
| H  | 9.384729999999999  | 16.809170000000002 | 7.261720000000000 |
| H  | 8.030300000000000  | 15.183680000000001 | 6.188010000000000 |
| H  | 12.317410000000001 | 5.416050000000000  | 5.586940000000000 |
| H  | 13.991479999999999 | 6.799170000000000  | 6.455480000000000 |
| H  | 10.101749999999999 | 4.907610000000000  | 7.215950000000000 |
| H  | 12.006880000000001 | 17.076570000000000 | 6.795980000000000 |
| H  | 6.787620000000000  | 8.037110000000000  | 7.928930000000000 |
| H  | 17.070499999999999 | 11.987100000000000 | 7.580890000000000 |
| H  | 16.048719999999999 | 8.655760000000001  | 6.729020000000000 |
| H  | 15.175689999999999 | 13.991759999999999 | 7.981620000000000 |
| H  | 5.949960000000000  | 13.335330000000001 | 6.505950000000000 |
| H  | 4.903840000000000  | 10.029430000000000 | 7.426310000000000 |
| C  | 10.338450000000000 | 15.182190000000000 | 6.749200000000000 |
| C  | 9.933070000000001  | 13.806089999999999 | 6.722780000000000 |
| C  | 8.612959999999999  | 13.372740000000000 | 6.556430000000000 |
| C  | 11.634650000000001 | 6.836360000000000  | 6.747670000000000 |
| C  | 12.055550000000000 | 8.207979999999999  | 6.756130000000000 |
| C  | 13.385690000000000 | 8.630789999999999  | 6.652640000000000 |
| C  | 10.315239999999999 | 6.796630000000000  | 7.139580000000000 |
| C  | 9.903729999999999  | 8.172450000000000  | 7.301170000000000 |
| C  | 11.669980000000001 | 15.222600000000000 | 7.093840000000000 |
| C  | 8.588509999999999  | 8.605820000000000  | 7.546750000000000 |
| C  | 15.171450000000000 | 11.649889999999999 | 7.420360000000000 |
| C  | 12.079340000000000 | 13.846740000000000 | 7.265790000000000 |
| C  | 13.800230000000001 | 12.086560000000000 | 7.392520000000000 |
| C  | 15.192190000000000 | 10.323010000000000 | 7.068730000000000 |
| C  | 13.813380000000000 | 9.939200000000000  | 6.879590000000000 |
| C  | 13.387169999999999 | 13.417610000000000 | 7.552340000000000 |
| C  | 6.797030000000000  | 11.681850000000001 | 6.928990000000000 |
| C  | 8.181940000000001  | 12.065500000000000 | 6.786210000000000 |
| C  | 6.806740000000000  | 10.364960000000000 | 7.315910000000000 |
| C  | 8.179460000000001  | 9.932570000000000  | 7.348060000000000 |
| Co | 10.994470000000000 | 11.007140000000000 | 7.216930000000000 |
| O  | 10.974330000000000 | 11.068130000000000 | 9.086990000000000 |
| O  | 9.507660000000000  | 16.280480000000001 | 6.448990000000000 |
| O  | 7.619480000000000  | 14.289059999999999 | 6.239080000000000 |
| O  | 12.462759999999999 | 5.719410000000000  | 6.504540000000000 |
| O  | 14.390359999999999 | 7.699320000000000  | 6.414100000000000 |
| O  | 9.523999999999999  | 5.691360000000000  | 7.298790000000000 |
| O  | 12.469310000000000 | 16.329480000000000 | 7.222910000000000 |
| O  | 7.685430000000000  | 7.642540000000000  | 7.902860000000000 |
| O  | 16.240459999999999 | 12.482030000000000 | 7.710760000000000 |
| O  | 16.331930000000000 | 9.567030000000001  | 6.954610000000000 |
| O  | 14.279650000000000 | 14.386049999999999 | 7.919090000000000 |
| O  | 5.661360000000000  | 12.432530000000000 | 6.756690000000000 |
| O  | 5.729550000000000  | 9.536650000000000  | 7.587960000000000 |
| N  | 11.014469999999999 | 12.985980000000000 | 7.013680000000000 |
| N  | 10.975260000000000 | 9.032900000000000  | 7.052380000000000 |
| N  | 12.963770000000000 | 11.026570000000000 | 7.055700000000000 |
| N  | 9.025359999999999  | 10.986340000000000 | 7.017770000000000 |



Transition Metal: Co; Functional Group: OH; Adsorbate: OOH

|    |                    |                    |                   |
|----|--------------------|--------------------|-------------------|
| H  | 9.369890000000000  | 16.803010000000000 | 7.145560000000000 |
| H  | 8.019560000000000  | 15.179060000000000 | 6.063010000000000 |
| H  | 12.338559999999999 | 5.426910000000000  | 5.415380000000000 |
| H  | 13.994700000000000 | 6.797030000000000  | 6.338470000000000 |
| H  | 10.105380000000000 | 4.897560000000000  | 7.017050000000000 |
| H  | 11.987170000000001 | 17.085609999999999 | 6.664730000000000 |
| H  | 6.780160000000000  | 8.006050000000000  | 7.719380000000000 |
| H  | 17.074829999999999 | 11.994300000000001 | 7.422240000000000 |
| H  | 16.049040000000002 | 8.650969999999999  | 6.625590000000000 |
| H  | 15.184530000000001 | 14.003940000000000 | 7.792370000000000 |
| H  | 5.946110000000000  | 13.322590000000000 | 6.356950000000000 |
| H  | 4.898200000000000  | 9.993130000000001  | 7.207640000000000 |
| H  | 9.498379999999999  | 10.593070000000001 | 9.844250000000001 |
| C  | 10.329499999999999 | 15.183199999999999 | 6.618150000000000 |
| C  | 9.927640000000000  | 13.805690000000000 | 6.593290000000000 |
| C  | 8.606280000000000  | 13.369890000000000 | 6.439690000000000 |
| C  | 11.639699999999999 | 6.832320000000000  | 6.583640000000000 |
| C  | 12.056800000000001 | 8.206030000000000  | 6.612460000000000 |
| C  | 13.388330000000000 | 8.628729999999999  | 6.534200000000000 |
| C  | 10.314780000000001 | 6.786700000000000  | 6.951430000000000 |
| C  | 9.900370000000001  | 8.161930000000000  | 7.119820000000000 |
| C  | 11.665020000000000 | 15.226749999999999 | 6.947110000000000 |
| C  | 8.585390000000000  | 8.587859999999999  | 7.376520000000000 |
| C  | 15.175430000000000 | 11.655210000000000 | 7.273340000000000 |
| C  | 12.080439999999999 | 13.851500000000000 | 7.110410000000000 |
| C  | 13.803670000000000 | 12.090890000000000 | 7.242630000000000 |
| C  | 15.194440000000000 | 10.323330000000000 | 6.942130000000000 |
| C  | 13.814340000000000 | 9.938290000000000  | 6.760100000000000 |
| C  | 13.391629999999999 | 13.424450000000000 | 7.387240000000000 |
| C  | 6.791930000000000  | 11.672800000000001 | 6.795160000000000 |
| C  | 8.176810000000000  | 12.062600000000000 | 6.672410000000000 |
| C  | 6.800230000000000  | 10.352440000000000 | 7.172840000000000 |
| C  | 8.173579999999999  | 9.920780000000001  | 7.214310000000000 |
| Co | 10.991870000000000 | 11.004300000000001 | 7.100150000000000 |
| O  | 9.493570000000000  | 16.280809999999999 | 6.328800000000000 |
| O  | 7.608680000000000  | 14.285480000000000 | 6.127010000000000 |
| O  | 12.471730000000001 | 5.718950000000000  | 6.338500000000000 |
| O  | 14.396300000000000 | 7.696790000000000  | 6.314540000000000 |
| O  | 9.522700000000000  | 5.678850000000000  | 7.088370000000000 |
| O  | 12.461150000000000 | 16.335819999999998 | 7.074010000000000 |
| O  | 7.679630000000000  | 7.615000000000000  | 7.702100000000000 |
| O  | 16.245680000000000 | 12.492839999999999 | 7.544090000000000 |
| O  | 16.333700000000000 | 9.566890000000001  | 6.830200000000000 |
| O  | 14.287900000000000 | 14.397650000000001 | 7.732650000000000 |
| O  | 5.655970000000000  | 12.420019999999999 | 6.607460000000000 |
| O  | 5.721600000000000  | 9.519700000000000  | 7.428550000000000 |
| O  | 11.080390000000000 | 11.192299999999999 | 8.973549999999999 |
| O  | 10.384200000000000 | 10.183719999999999 | 9.725630000000001 |
| N  | 11.014460000000000 | 12.988379999999999 | 6.868720000000000 |
| N  | 10.971769999999999 | 9.024860000000000  | 6.897170000000000 |
| N  | 12.966870000000000 | 11.026009999999999 | 6.925240000000000 |
| N  | 9.020730000000000  | 10.984190000000000 | 6.916840000000000 |

Transition Metal: Cr; Functional Group: BH2; Adsorbate: Clean

|    |                    |                    |                   |
|----|--------------------|--------------------|-------------------|
| N  | 10.746680000000000 | 13.046519999999999 | 7.286050000000000 |
| N  | 10.945270000000000 | 8.945449999999999  | 7.299800000000000 |
| N  | 12.887639999999999 | 11.103370000000000 | 7.307560000000000 |
| N  | 8.867860000000000  | 10.967340000000000 | 7.330940000000000 |
| Cr | 10.868570000000000 | 11.012869999999999 | 7.305700000000000 |
| C  | 10.142630000000000 | 15.316890000000001 | 7.123040000000000 |
| C  | 9.664310000000000  | 13.920520000000000 | 7.217510000000000 |
| C  | 8.326570000000000  | 13.440099999999999 | 7.290170000000000 |
| C  | 11.589900000000000 | 6.680740000000000  | 7.183850000000000 |
| C  | 12.052099999999999 | 8.086650000000001  | 7.226470000000000 |
| C  | 13.363899999999999 | 8.588530000000000  | 7.270870000000000 |
| C  | 10.191420000000001 | 6.731840000000000  | 7.298200000000000 |
| C  | 9.836810000000000  | 8.136540000000000  | 7.341390000000000 |
| C  | 11.543790000000000 | 15.226100000000001 | 7.184090000000000 |
| C  | 8.474150000000000  | 8.538600000000001  | 7.412290000000000 |
| C  | 15.156940000000001 | 11.723490000000000 | 7.453020000000000 |
| C  | 11.883360000000000 | 13.834720000000001 | 7.263030000000000 |
| C  | 13.756580000000000 | 12.196890000000000 | 7.375800000000000 |
| C  | 15.072030000000000 | 10.325329999999999 | 7.380460000000000 |
| C  | 13.675940000000001 | 9.977160000000000  | 7.316160000000000 |
| C  | 13.263900000000000 | 13.515829999999999 | 7.312150000000000 |
| C  | 6.639140000000000  | 11.670370000000000 | 7.432370000000000 |
| C  | 8.031510000000001  | 12.070959999999999 | 7.345540000000000 |
| C  | 6.620650000000000  | 10.277680000000000 | 7.465940000000000 |
| C  | 8.035729999999999  | 9.883950000000000  | 7.400660000000000 |
| B  | 9.414840000000000  | 16.629799999999999 | 6.771820000000000 |
| B  | 6.938230000000000  | 14.244009999999999 | 7.381220000000000 |
| B  | 12.303369999999999 | 5.365030000000000  | 6.826870000000000 |
| B  | 14.737240000000000 | 7.767080000000000  | 7.345820000000000 |
| B  | 9.106040000000000  | 5.584820000000000  | 7.307590000000000 |
| B  | 12.826330000000000 | 16.140039999999999 | 7.133770000000000 |
| B  | 7.436410000000000  | 7.466090000000000  | 7.509270000000000 |
| B  | 16.472370000000002 | 12.441470000000001 | 7.819700000000000 |
| B  | 15.990959999999999 | 9.046920000000000  | 7.422760000000000 |
| B  | 14.099200000000000 | 14.884230000000001 | 7.227430000000000 |
| B  | 5.706600000000000  | 12.933109999999999 | 7.477360000000000 |
| B  | 5.461250000000000  | 9.220110000000000  | 7.557660000000000 |
| H  | 8.327470000000000  | 16.656900000000000 | 6.263920000000000 |
| H  | 9.996409999999999  | 17.669920000000001 | 6.948260000000000 |
| H  | 6.194550000000000  | 13.788520000000000 | 8.402740000000000 |
| H  | 6.769970000000000  | 15.425789999999999 | 7.407380000000000 |
| H  | 11.710640000000000 | 4.332930000000000  | 7.025670000000000 |
| H  | 13.378010000000000 | 5.312990000000000  | 6.294890000000000 |
| H  | 14.884810000000000 | 6.583590000000000  | 7.371000000000000 |
| H  | 15.621070000000000 | 8.211760000000000  | 6.432870000000000 |
| H  | 8.961449999999999  | 4.912650000000000  | 8.301679999999999 |
| H  | 8.732120000000000  | 5.108820000000000  | 6.261620000000000 |
| H  | 13.672910000000000 | 15.647370000000000 | 6.207340000000000 |
| H  | 12.916729999999999 | 17.330230000000000 | 7.055120000000000 |
| H  | 6.219530000000000  | 7.676600000000000  | 7.558600000000000 |
| H  | 7.672660000000000  | 6.249120000000000  | 7.584040000000000 |
| H  | 16.499210000000001 | 13.487740000000001 | 8.408080000000000 |
| H  | 17.513940000000002 | 11.887520000000000 | 7.577140000000000 |
| H  | 15.509810000000000 | 8.209610000000000  | 8.357040000000000 |
| H  | 17.182810000000000 | 8.962940000000000  | 7.489260000000000 |
| H  | 13.664840000000000 | 15.778449999999999 | 8.129799999999999 |
| H  | 15.285850000000000 | 15.014989999999999 | 7.208840000000000 |
| H  | 4.513950000000000  | 13.008039999999999 | 7.560860000000000 |
| H  | 6.056520000000000  | 13.783010000000001 | 6.480590000000000 |
| H  | 4.849000000000000  | 8.906730000000000  | 6.564320000000000 |
| H  | 4.959040000000000  | 8.967680000000000  | 8.627260000000000 |

Transition Metal: Cr; Functional Group: BH2; Adsorbate: O

|    |                    |                    |                   |
|----|--------------------|--------------------|-------------------|
| C  | 10.150150000000000 | 15.285480000000000 | 6.734920000000000 |
| C  | 9.673360000000000  | 13.896210000000000 | 6.859880000000000 |
| C  | 8.342350000000000  | 13.432940000000000 | 6.894150000000000 |
| C  | 11.578609999999999 | 6.713870000000000  | 6.834450000000000 |
| C  | 12.036190000000000 | 8.116600000000000  | 6.887950000000000 |
| C  | 13.347410000000000 | 8.598770000000000  | 6.871010000000000 |
| C  | 10.187550000000000 | 6.757850000000000  | 6.998780000000000 |
| C  | 9.839990000000000  | 8.161120000000000  | 7.078250000000000 |
| C  | 11.543030000000000 | 15.204940000000001 | 6.869850000000000 |
| C  | 8.483260000000000  | 8.543889999999999  | 7.164960000000000 |
| C  | 15.123220000000000 | 11.720660000000001 | 7.112310000000000 |
| C  | 11.879700000000000 | 13.817100000000000 | 7.014230000000000 |
| C  | 13.725700000000000 | 12.187400000000000 | 7.109190000000000 |
| C  | 15.037350000000000 | 10.329029999999999 | 6.950200000000000 |
| C  | 13.646839999999999 | 9.981909999999999  | 6.929080000000000 |
| C  | 13.254750000000000 | 13.510149999999999 | 7.079100000000000 |
| C  | 6.679050000000000  | 11.663919999999999 | 7.033440000000000 |
| C  | 8.066910000000000  | 12.063359999999999 | 6.970690000000000 |
| C  | 6.663200000000000  | 10.271170000000000 | 7.110950000000000 |
| C  | 8.071590000000000  | 9.888230000000000  | 7.094520000000000 |
| B  | 9.428080000000000  | 16.584949999999999 | 6.316140000000000 |
| B  | 6.952310000000000  | 14.235230000000000 | 6.918520000000000 |
| B  | 12.281499999999999 | 5.408960000000000  | 6.414030000000000 |
| B  | 14.721439999999999 | 7.772820000000000  | 6.864980000000000 |
| B  | 9.082150000000000  | 5.628080000000000  | 6.986520000000000 |
| B  | 12.823800000000000 | 16.120930000000001 | 6.815190000000000 |
| B  | 7.449480000000000  | 7.473140000000000  | 7.279930000000000 |
| B  | 16.438189999999999 | 12.428330000000001 | 7.498420000000000 |
| B  | 15.964359999999999 | 9.056970000000000  | 6.919870000000000 |
| B  | 14.093719999999999 | 14.870649999999999 | 6.966500000000000 |
| B  | 5.734850000000000  | 12.917940000000000 | 7.014850000000000 |
| B  | 5.508840000000000  | 9.204810000000000  | 7.191850000000000 |
| H  | 8.373810000000001  | 16.592770000000002 | 5.743850000000000 |
| H  | 9.988730000000000  | 17.631390000000000 | 6.516290000000000 |
| H  | 6.185300000000000  | 13.805619999999999 | 7.930570000000000 |
| H  | 6.780140000000000  | 15.416370000000001 | 6.902240000000000 |
| H  | 11.725890000000000 | 4.369500000000000  | 6.669310000000000 |
| H  | 13.301460000000001 | 5.375310000000000  | 5.783040000000000 |
| H  | 14.866190000000000 | 6.588830000000000  | 6.856430000000000 |
| H  | 15.559970000000000 | 8.236929999999999  | 5.925820000000000 |
| H  | 8.985720000000001  | 4.884340000000000  | 7.934350000000000 |
| H  | 8.668030000000000  | 5.220740000000000  | 5.926500000000000 |
| H  | 13.684010000000001 | 15.607630000000000 | 5.916720000000000 |
| H  | 12.908080000000000 | 17.308199999999999 | 6.704520000000000 |
| H  | 6.229650000000000  | 7.678130000000000  | 7.308300000000000 |
| H  | 7.691630000000000  | 6.259090000000000  | 7.406040000000000 |
| H  | 16.465640000000000 | 13.442900000000000 | 8.138310000000001 |
| H  | 17.478510000000000 | 11.890960000000000 | 7.216800000000000 |
| H  | 15.532480000000000 | 8.187170000000000  | 7.852840000000000 |
| H  | 17.157550000000001 | 8.983480000000000  | 6.932710000000000 |
| H  | 13.642720000000001 | 15.790050000000001 | 7.834770000000000 |
| H  | 15.280210000000000 | 15.001749999999999 | 6.962430000000000 |
| H  | 4.540600000000000  | 12.977119999999999 | 7.065380000000000 |
| H  | 6.101050000000000  | 13.745520000000001 | 6.005220000000000 |
| H  | 4.940600000000000  | 8.857049999999999  | 6.184140000000000 |
| H  | 4.945600000000000  | 9.012650000000001  | 8.243160000000000 |
| O  | 10.922650000000001 | 11.063870000000000 | 9.094130000000000 |
| N  | 10.751970000000000 | 13.019660000000000 | 7.021050000000000 |
| N  | 10.936109999999999 | 8.982590000000000  | 7.025050000000000 |
| N  | 12.844860000000001 | 11.099230000000000 | 7.023140000000000 |
| N  | 8.918220000000000  | 10.967620000000000 | 7.001190000000000 |
| Cr | 10.870870000000000 | 11.032760000000000 | 7.505530000000000 |

## Transition Metal: Cr; Functional Group: BH2; Adsorbate: OH

|    |                     |                     |                    |
|----|---------------------|---------------------|--------------------|
| C  | 10.1423400000000001 | 15.3031500000000000 | 6.6673400000000000 |
| C  | 9.6647700000000001  | 13.9156499999999999 | 6.8213800000000000 |
| C  | 8.3261900000000000  | 13.4385999999999999 | 6.8674000000000000 |
| C  | 11.5836700000000000 | 6.6971100000000000  | 6.7421200000000000 |
| C  | 12.0447600000000000 | 8.1000700000000001  | 6.8283900000000000 |
| C  | 13.3572900000000001 | 8.5975600000000000  | 6.8519700000000000 |
| C  | 10.1867699999999999 | 6.7439700000000000  | 6.8721700000000000 |
| C  | 9.8357899999999999  | 8.1461500000000000  | 6.9624600000000000 |
| C  | 11.5439100000000000 | 15.2176200000000000 | 6.7502600000000000 |
| C  | 8.4744499999999999  | 8.5461399999999999  | 7.0183300000000000 |
| C  | 15.1532699999999999 | 11.7263300000000001 | 6.9766600000000000 |
| C  | 11.8832100000000000 | 13.8340500000000000 | 6.8951200000000000 |
| C  | 13.7501500000000000 | 12.1988100000000000 | 6.9707700000000000 |
| C  | 15.0646500000000000 | 10.3314900000000001 | 6.8957100000000000 |
| C  | 13.6649800000000000 | 9.9835300000000000  | 6.8968800000000000 |
| C  | 13.2640600000000001 | 13.5169099999999999 | 6.9267200000000000 |
| C  | 6.6414100000000000  | 11.6682299999999999 | 6.9442800000000000 |
| C  | 8.0362399999999999  | 12.0715299999999999 | 6.9159500000000000 |
| C  | 6.6253800000000000  | 10.2774699999999999 | 6.9829500000000000 |
| C  | 8.0433699999999999  | 9.8888500000000000  | 6.9807700000000000 |
| B  | 9.4153199999999999  | 16.5949199999999998 | 6.2449700000000000 |
| B  | 6.9351400000000000  | 14.2412700000000000 | 6.8997900000000000 |
| B  | 12.2921600000000001 | 5.3960300000000000  | 6.3275100000000000 |
| B  | 14.7315200000000000 | 7.7747400000000000  | 6.8653300000000000 |
| B  | 9.0981600000000000  | 5.6012800000000000  | 6.8370600000000000 |
| B  | 12.8250499999999999 | 16.1288400000000000 | 6.6541600000000000 |
| B  | 7.4317600000000000  | 7.4754700000000000  | 7.0937000000000000 |
| B  | 16.4836700000000000 | 12.4396600000000000 | 7.2982300000000000 |
| B  | 15.9857900000000000 | 9.0538100000000000  | 6.8915500000000000 |
| B  | 14.1004000000000000 | 14.8798999999999999 | 6.7881800000000000 |
| B  | 5.7043000000000000  | 12.9280399999999999 | 6.9463700000000000 |
| B  | 5.4685000000000000  | 9.2122899999999999  | 7.0216300000000000 |
| H  | 10.9600600000000000 | 11.9133300000000000 | 9.4463100000000000 |
| H  | 8.3320100000000000  | 16.5975900000000000 | 5.7283000000000000 |
| H  | 9.9948099999999999  | 17.6426000000000002 | 6.3764200000000000 |
| H  | 6.1521600000000000  | 13.7846700000000000 | 7.8902900000000000 |
| H  | 6.7644900000000000  | 15.4227600000000000 | 6.9202500000000000 |
| H  | 11.7082200000000001 | 4.3564800000000000  | 6.5122600000000000 |
| H  | 13.3518700000000000 | 5.3633100000000000  | 5.7653100000000000 |
| H  | 14.8785100000000000 | 6.5911900000000000  | 6.8820200000000000 |
| H  | 15.5760299999999999 | 8.2212999999999999  | 5.9160400000000000 |
| H  | 8.9587400000000001  | 4.8819600000000000  | 7.7979000000000000 |
| H  | 8.7060700000000000  | 5.1828900000000000  | 5.7730700000000000 |
| H  | 13.6689600000000000 | 15.6030700000000001 | 5.7423300000000000 |
| H  | 12.9129799999999999 | 17.3154000000000000 | 6.5307200000000000 |
| H  | 6.2134200000000000  | 7.6893200000000000  | 7.1169500000000000 |
| H  | 7.6649600000000000  | 6.2598500000000000  | 7.1851000000000000 |
| H  | 16.5346499999999999 | 13.4759400000000000 | 7.9020900000000000 |
| H  | 17.5138900000000000 | 11.8881599999999999 | 7.0073300000000000 |
| H  | 15.5457600000000000 | 8.2148600000000000  | 7.8438000000000000 |
| H  | 17.1792799999999999 | 8.9727599999999999  | 6.9081400000000000 |
| H  | 13.6702900000000000 | 15.8046900000000001 | 7.6585700000000000 |
| H  | 15.2868900000000000 | 15.0097000000000000 | 6.7603100000000000 |
| H  | 4.5094300000000000  | 12.9984900000000000 | 6.9830000000000000 |
| H  | 6.0925100000000000  | 13.7773800000000001 | 5.9636000000000000 |
| H  | 4.9212200000000000  | 8.8802200000000000  | 5.9969900000000000 |
| H  | 4.8936500000000000  | 8.9868299999999999  | 8.0599500000000001 |
| O  | 10.8922100000000000 | 11.0144900000000000 | 9.0707000000000000 |
| N  | 10.7472600000000001 | 13.0452800000000000 | 6.9491200000000000 |
| N  | 10.9420699999999999 | 8.9562899999999999  | 6.9459300000000000 |
| N  | 12.8766300000000000 | 11.1075500000000000 | 6.9352600000000000 |
| N  | 8.8775200000000001  | 10.9725400000000000 | 6.9360200000000000 |
| Cr | 10.8658400000000000 | 11.0231400000000000 | 7.2297800000000000 |

Transition Metal: Cr; Functional Group: BH2; Adsorbate: OOH

|    |                    |                    |                    |
|----|--------------------|--------------------|--------------------|
| Cr | 10.870870000000000 | 11.032760000000000 | 7.505530000000000  |
| C  | 10.150150000000000 | 15.285480000000000 | 6.734920000000000  |
| C  | 9.673360000000001  | 13.896210000000000 | 6.859880000000000  |
| C  | 8.342350000000000  | 13.432940000000000 | 6.894150000000000  |
| C  | 11.578609999999999 | 6.713870000000000  | 6.834450000000000  |
| C  | 12.036190000000000 | 8.116600000000000  | 6.887950000000000  |
| C  | 13.347410000000000 | 8.598770000000000  | 6.871010000000000  |
| C  | 10.187550000000000 | 6.757850000000000  | 6.998780000000000  |
| C  | 9.839990000000000  | 8.161120000000000  | 7.078250000000000  |
| C  | 11.543030000000000 | 15.204940000000001 | 6.869850000000000  |
| C  | 8.483260000000000  | 8.543889999999999  | 7.164960000000000  |
| C  | 15.123220000000000 | 11.720660000000001 | 7.112310000000000  |
| C  | 11.879700000000000 | 13.817100000000000 | 7.014230000000000  |
| C  | 13.725700000000000 | 12.187400000000000 | 7.109190000000000  |
| C  | 15.037350000000000 | 10.329029999999999 | 6.950200000000000  |
| C  | 13.646839999999999 | 9.981909999999999  | 6.929080000000000  |
| C  | 13.254750000000000 | 13.510149999999999 | 7.079100000000000  |
| C  | 6.679050000000000  | 11.663919999999999 | 7.033440000000000  |
| C  | 8.066910000000000  | 12.063359999999999 | 6.970690000000000  |
| C  | 6.663200000000000  | 10.271170000000000 | 7.110950000000000  |
| C  | 8.071590000000000  | 9.888230000000000  | 7.094520000000000  |
| B  | 9.428080000000000  | 16.584949999999999 | 6.316140000000000  |
| B  | 6.952310000000000  | 14.235230000000000 | 6.918520000000000  |
| B  | 12.281499999999999 | 5.408960000000000  | 6.414030000000000  |
| B  | 14.721439999999999 | 7.772820000000000  | 6.864980000000000  |
| B  | 9.082150000000000  | 5.628080000000000  | 6.986520000000000  |
| B  | 12.823800000000000 | 16.120930000000001 | 6.815190000000000  |
| B  | 7.449480000000000  | 7.473140000000000  | 7.279930000000000  |
| B  | 16.438189999999999 | 12.428330000000001 | 7.498420000000000  |
| B  | 15.964359999999999 | 9.056970000000000  | 6.919870000000000  |
| B  | 14.093719999999999 | 14.870649999999999 | 6.966500000000000  |
| B  | 5.734850000000000  | 12.917940000000000 | 7.014850000000000  |
| B  | 5.508840000000000  | 9.204810000000000  | 7.191850000000000  |
| H  | 8.373810000000001  | 16.592770000000002 | 5.743850000000000  |
| H  | 9.988730000000000  | 17.631390000000000 | 6.516290000000000  |
| H  | 6.185300000000000  | 13.805619999999999 | 7.930570000000000  |
| H  | 6.780140000000000  | 15.416370000000001 | 6.902240000000000  |
| H  | 11.725890000000000 | 4.369500000000000  | 6.669310000000000  |
| H  | 13.301460000000001 | 5.375310000000000  | 5.783040000000000  |
| H  | 14.866190000000000 | 6.588830000000000  | 6.856430000000000  |
| H  | 15.559970000000000 | 8.236929999999999  | 5.925820000000000  |
| H  | 8.985720000000001  | 4.884340000000000  | 7.934350000000000  |
| H  | 8.668030000000000  | 5.220740000000000  | 5.926500000000000  |
| H  | 13.684010000000001 | 15.607630000000000 | 5.916720000000000  |
| H  | 12.908080000000000 | 17.308199999999999 | 6.704520000000000  |
| H  | 6.229650000000000  | 7.678130000000000  | 7.308300000000000  |
| H  | 7.691630000000000  | 6.259090000000000  | 7.406040000000000  |
| H  | 16.465640000000000 | 13.442900000000000 | 8.138310000000001  |
| H  | 17.478510000000000 | 11.890960000000000 | 7.216800000000000  |
| H  | 15.532480000000000 | 8.187170000000000  | 7.852840000000000  |
| H  | 17.157550000000001 | 8.983480000000000  | 6.932710000000000  |
| H  | 13.642720000000001 | 15.790050000000001 | 7.834770000000000  |
| H  | 15.280210000000000 | 15.001749999999999 | 6.962430000000000  |
| H  | 4.540600000000000  | 12.977119999999999 | 7.065380000000000  |
| H  | 6.101050000000000  | 13.745520000000001 | 6.005220000000000  |
| H  | 4.940600000000000  | 8.857049999999999  | 6.184140000000000  |
| H  | 4.945600000000000  | 9.012650000000001  | 8.243160000000000  |
| N  | 10.751970000000000 | 13.019660000000000 | 7.021050000000000  |
| N  | 10.936109999999999 | 8.982590000000000  | 7.025050000000000  |
| N  | 12.844860000000001 | 11.099230000000000 | 7.023140000000000  |
| N  | 8.918220000000000  | 10.967620000000000 | 7.001190000000000  |
| O  | 10.932462135999895 | 11.069765240458800 | 9.395164361711693  |
| H  | 9.342386154979147  | 11.435540438160226 | 10.388377011637717 |
| O  | 9.817572071617601  | 10.592327782608585 | 10.230576668997005 |

Transition Metal: Cr; Functional Group: CH3; Adsorbate: Clean

|    |                    |                    |                   |
|----|--------------------|--------------------|-------------------|
| Cr | 10.977580000000000 | 11.040749999999999 | 7.356090000000000 |
| C  | 10.399839999999999 | 15.287039999999999 | 7.522360000000000 |
| C  | 9.904410000000000  | 13.911910000000001 | 7.464210000000000 |
| C  | 8.545610000000000  | 13.491660000000000 | 7.518770000000000 |
| C  | 11.637449999999999 | 6.841940000000000  | 8.051869999999999 |
| C  | 12.042249999999999 | 8.247450000000001  | 8.045280000000000 |
| C  | 13.338550000000000 | 8.752879999999999  | 8.337809999999999 |
| C  | 10.347329999999999 | 6.788890000000000  | 7.543420000000000 |
| C  | 9.933059999999999  | 8.167400000000001  | 7.286260000000000 |
| C  | 11.739970000000000 | 15.252280000000001 | 7.164930000000000 |
| C  | 8.628060000000000  | 8.604240000000001  | 6.934620000000000 |
| C  | 15.228140000000000 | 11.621010000000000 | 7.050660000000000 |
| C  | 12.088720000000000 | 13.850800000000000 | 6.963390000000000 |
| C  | 13.835080000000000 | 12.055650000000000 | 6.951210000000000 |
| C  | 15.219130000000000 | 10.368720000000000 | 7.648980000000000 |
| C  | 13.819120000000000 | 10.004009999999999 | 7.857420000000000 |
| C  | 13.375000000000000 | 13.352880000000001 | 6.604930000000000 |
| C  | 6.734200000000000  | 11.658120000000000 | 7.650840000000000 |
| C  | 8.112539999999999  | 12.136520000000001 | 7.538770000000000 |
| C  | 6.751250000000000  | 10.297900000000000 | 7.379210000000000 |
| C  | 8.147140000000000  | 9.921680000000000  | 7.183030000000000 |
| C  | 9.687960000000000  | 16.515059999999998 | 8.036910000000001 |
| C  | 7.477680000000000  | 14.567950000000000 | 7.345990000000000 |
| C  | 12.466630000000000 | 5.632920000000000  | 8.408490000000000 |
| C  | 14.246810000000000 | 7.937910000000000  | 9.250299999999999 |
| C  | 9.525840000000001  | 5.529940000000000  | 7.418960000000000 |
| C  | 12.668270000000000 | 16.440329999999999 | 7.168680000000000 |
| C  | 7.701040000000000  | 7.633680000000000  | 6.212460000000000 |
| C  | 16.476459999999999 | 12.387630000000000 | 6.692510000000000 |
| C  | 16.446010000000001 | 9.524179999999999  | 7.891480000000000 |
| C  | 14.272090000000000 | 14.260439999999999 | 5.772420000000000 |
| C  | 5.519700000000000  | 12.411989999999999 | 8.136960000000000 |
| C  | 5.553070000000000  | 9.386030000000000  | 7.452950000000000 |
| N  | 10.979500000000000 | 13.060720000000000 | 7.221350000000000 |
| N  | 10.987080000000001 | 9.019860000000000  | 7.581280000000000 |
| N  | 13.010109999999999 | 11.038980000000000 | 7.415410000000000 |
| N  | 8.950329999999999  | 11.040220000000000 | 7.346380000000000 |
| H  | 8.937939999999999  | 16.267779999999998 | 8.799300000000001 |
| H  | 10.405889999999999 | 17.205210000000001 | 8.504799999999999 |
| H  | 9.174840000000000  | 17.086810000000000 | 7.243590000000000 |
| H  | 6.622540000000000  | 14.176489999999999 | 6.785540000000000 |
| H  | 7.091930000000000  | 14.974660000000000 | 8.295780000000001 |
| H  | 7.867700000000000  | 15.408340000000001 | 6.763210000000000 |
| H  | 12.598670000000000 | 5.505330000000000  | 9.496210000000000 |
| H  | 12.000159999999999 | 4.713650000000000  | 8.029410000000000 |
| H  | 13.472030000000000 | 5.682930000000000  | 7.966220000000000 |
| H  | 14.906060000000000 | 8.604720000000000  | 9.818870000000000 |
| H  | 13.646010000000000 | 7.389030000000000  | 9.985620000000001 |
| H  | 14.887460000000001 | 7.202600000000000  | 8.736700000000001 |
| H  | 9.372880000000000  | 5.217220000000000  | 6.372260000000000 |
| H  | 10.010100000000000 | 4.693310000000000  | 7.939790000000000 |
| H  | 8.528969999999999  | 5.647430000000000  | 7.867870000000000 |
| H  | 12.245210000000000 | 17.265190000000000 | 7.759350000000000 |
| H  | 13.649620000000001 | 16.198589999999999 | 7.601290000000000 |
| H  | 12.848560000000001 | 16.840579999999999 | 6.156230000000000 |
| H  | 8.284170000000000  | 6.971730000000000  | 5.560280000000000 |
| H  | 7.092230000000000  | 6.992010000000000  | 6.869650000000000 |
| H  | 7.010150000000000  | 8.185810000000000  | 5.563850000000000 |
| H  | 16.471399999999999 | 13.401230000000000 | 7.119470000000000 |
| H  | 17.370429999999999 | 11.884589999999999 | 7.084320000000000 |
| H  | 16.614950000000000 | 12.497859999999999 | 5.603810000000000 |
| H  | 16.750499999999999 | 9.499040000000001  | 8.951630000000000 |
| H  | 16.292639999999999 | 8.482570000000001  | 7.575530000000000 |
| H  | 17.302209999999999 | 9.905650000000000  | 7.318850000000000 |
| H  | 15.005470000000001 | 14.845860000000000 | 6.350330000000000 |
| H  | 14.834360000000000 | 13.665960000000000 | 5.041230000000000 |

|   |                    |                    |                   |
|---|--------------------|--------------------|-------------------|
| H | 13.664000000000000 | 14.970440000000000 | 5.199700000000000 |
| H | 4.818380000000000  | 11.727370000000001 | 8.636550000000000 |
| H | 5.782100000000000  | 13.188950000000000 | 8.866650000000000 |
| H | 4.955350000000000  | 12.901730000000001 | 7.323930000000000 |
| H | 5.774280000000000  | 8.452120000000001  | 7.989880000000000 |
| H | 4.720020000000000  | 9.874510000000001  | 7.977530000000000 |
| H | 5.173350000000000  | 9.105020000000000  | 6.455900000000000 |

Transition Metal: Cr; Functional Group: CH3; Adsorbate: O

|    |                    |                    |                    |
|----|--------------------|--------------------|--------------------|
| Cr | 10.978960000000001 | 11.002700000000001 | 6.767510000000000  |
| C  | 10.466150000000001 | 15.212300000000001 | 7.599060000000000  |
| C  | 9.955460000000000  | 13.846190000000000 | 7.521240000000000  |
| C  | 8.605890000000000  | 13.439760000000000 | 7.667350000000000  |
| C  | 11.578210000000000 | 6.930870000000000  | 8.106019999999999  |
| C  | 11.980630000000000 | 8.335500000000000  | 8.057330000000000  |
| C  | 13.243520000000000 | 8.858390000000000  | 8.428129999999999  |
| C  | 10.348800000000001 | 6.841220000000000  | 7.468350000000000  |
| C  | 9.956619999999999  | 8.203630000000000  | 7.125410000000000  |
| C  | 11.754870000000000 | 15.192190000000000 | 7.086220000000000  |
| C  | 8.671670000000001  | 8.624689999999999  | 6.709570000000000  |
| C  | 15.170349999999999 | 11.619410000000000 | 6.993730000000000  |
| C  | 12.071199999999999 | 13.799659999999999 | 6.809430000000000  |
| C  | 13.785349999999999 | 12.034190000000001 | 6.812350000000000  |
| C  | 15.139239999999999 | 10.431979999999999 | 7.714350000000000  |
| C  | 13.735120000000000 | 10.073779999999999 | 7.883260000000000  |
| C  | 13.336150000000000 | 13.307390000000000 | 6.390610000000000  |
| C  | 6.813710000000000  | 11.598929999999999 | 7.723760000000000  |
| C  | 8.183669999999999  | 12.088480000000001 | 7.600980000000000  |
| C  | 6.814390000000000  | 10.278829999999999 | 7.296410000000000  |
| C  | 8.200110000000000  | 9.925459999999999  | 7.032370000000000  |
| C  | 9.833119999999999  | 16.409179999999999 | 8.268649999999999  |
| C  | 7.535890000000000  | 14.525510000000001 | 7.684810000000000  |
| C  | 12.364129999999999 | 5.755330000000000  | 8.630210000000000  |
| C  | 14.085050000000001 | 8.120880000000000  | 9.458930000000001  |
| C  | 9.543229999999999  | 5.579120000000000  | 7.296610000000000  |
| C  | 12.681760000000001 | 16.378060000000001 | 7.013650000000000  |
| C  | 7.775390000000000  | 7.679940000000000  | 5.926400000000000  |
| C  | 16.419720000000002 | 12.359299999999999 | 6.589790000000000  |
| C  | 16.354710000000001 | 9.631150000000000  | 8.110450000000000  |
| C  | 14.206610000000000 | 14.179500000000001 | 5.501230000000000  |
| C  | 5.625300000000000  | 12.286880000000000 | 8.353610000000000  |
| C  | 5.612770000000000  | 9.369600000000000  | 7.285090000000000  |
| N  | 10.990539999999999 | 12.997080000000000 | 7.134220000000000  |
| N  | 10.973739999999999 | 9.080719999999999  | 7.460570000000000  |
| N  | 12.938050000000000 | 11.059419999999999 | 7.322260000000000  |
| N  | 9.018219999999999  | 11.019280000000000 | 7.274240000000000  |
| O  | 11.007999999999999 | 10.857310000000000 | 5.174690000000000  |
| H  | 9.160250000000000  | 16.114470000000001 | 9.084160000000001  |
| H  | 10.608630000000000 | 17.052900000000001 | 8.710440000000000  |
| H  | 9.253679999999999  | 17.043350000000000 | 7.574800000000000  |
| H  | 6.634260000000000  | 14.188560000000001 | 7.164470000000000  |
| H  | 7.236140000000000  | 14.837870000000001 | 8.699159999999999  |
| H  | 7.880490000000000  | 15.417420000000000 | 7.153620000000000  |
| H  | 12.397720000000000 | 5.719990000000000  | 9.732010000000001  |
| H  | 11.923750000000000 | 4.808370000000000  | 8.290720000000000  |
| H  | 13.405090000000000 | 5.766280000000000  | 8.275610000000000  |
| H  | 14.703640000000000 | 8.831670000000001  | 10.019909999999999 |
| H  | 13.434770000000000 | 7.623740000000000  | 10.189270000000000 |
| H  | 14.759209999999999 | 7.353410000000000  | 9.045059999999999  |
| H  | 9.446470000000000  | 5.276990000000000  | 6.240830000000000  |
| H  | 10.004519999999999 | 4.739940000000000  | 7.833790000000000  |
| H  | 8.523380000000000  | 5.689030000000000  | 7.695170000000000  |
| H  | 12.286160000000001 | 17.221180000000000 | 7.596860000000000  |
| H  | 13.683389999999999 | 16.148260000000001 | 7.406330000000000  |
| H  | 12.814050000000000 | 16.744219999999999 | 5.981640000000000  |
| H  | 8.384280000000000  | 7.030350000000000  | 5.284800000000000  |
| H  | 7.135550000000000  | 7.027340000000000  | 6.541930000000000  |
| H  | 7.116050000000000  | 8.253660000000000  | 5.262760000000000  |
| H  | 16.427050000000001 | 13.390900000000000 | 6.973660000000000  |
| H  | 17.315829999999998 | 11.867000000000001 | 6.989730000000000  |
| H  | 16.541440000000001 | 12.421189999999999 | 5.496150000000000  |
| H  | 16.584320000000002 | 9.704120000000000  | 9.187030000000000  |
| H  | 16.235779999999998 | 8.563620000000000  | 7.876520000000000  |
| H  | 17.244430000000001 | 9.977670000000000  | 7.567630000000000  |
| H  | 14.957640000000000 | 14.783049999999999 | 6.036020000000000  |



|   |                    |                    |                   |
|---|--------------------|--------------------|-------------------|
| H | 14.745609999999999 | 13.555790000000000 | 4.776130000000000 |
| H | 13.580310000000001 | 14.869600000000000 | 4.922900000000000 |
| H | 4.962170000000000  | 11.546329999999999 | 8.824759999999999 |
| H | 5.927090000000000  | 12.989770000000000 | 9.140470000000001 |
| H | 5.009090000000000  | 12.847530000000001 | 7.628950000000000 |
| H | 5.809830000000000  | 8.411220000000000  | 7.788810000000000 |
| H | 4.761100000000000  | 9.839219999999999  | 7.795850000000000 |
| H | 5.275390000000000  | 9.134930000000001  | 6.262060000000000 |

Transition Metal: Cr; Functional Group: CH3; Adsorbate: OH

|    |                     |                     |                     |
|----|---------------------|---------------------|---------------------|
| Cr | 10.9874100000000001 | 11.0254800000000000 | 7.0169900000000000  |
| C  | 10.4451500000000000 | 15.2571999999999999 | 7.5822300000000000  |
| C  | 9.9324200000000000  | 13.8899600000000000 | 7.5117100000000000  |
| C  | 8.5769400000000000  | 13.4766499999999999 | 7.6220100000000000  |
| C  | 11.6051300000000001 | 6.8914000000000000  | 8.0917900000000000  |
| C  | 12.0213699999999999 | 8.2941900000000000  | 8.0536700000000000  |
| C  | 13.3071000000000000 | 8.8059200000000000  | 8.3751200000000001  |
| C  | 10.3464500000000001 | 6.8254300000000000  | 7.5100800000000000  |
| C  | 9.9548500000000000  | 8.1956900000000001  | 7.1917600000000000  |
| C  | 11.7550700000000000 | 15.2264000000000000 | 7.1239500000000000  |
| C  | 8.6669699999999999  | 8.6309000000000000  | 6.7856200000000000  |
| C  | 15.2140900000000001 | 11.6424500000000000 | 7.0430900000000000  |
| C  | 12.0806900000000001 | 13.8296600000000001 | 6.8710600000000000  |
| C  | 13.8214200000000000 | 12.0503600000000000 | 6.8766400000000000  |
| C  | 15.1988100000000000 | 10.4219300000000000 | 7.7048400000000000  |
| C  | 13.7961899999999999 | 10.0434699999999999 | 7.8728000000000000  |
| C  | 13.3544699999999999 | 13.3283700000000000 | 6.4779000000000000  |
| C  | 6.7739700000000000  | 11.6293200000000000 | 7.6937500000000000  |
| C  | 8.1455000000000000  | 12.1232700000000000 | 7.5770100000000000  |
| C  | 6.7873400000000000  | 10.2933500000000000 | 7.3167100000000000  |
| C  | 8.1790299999999999  | 9.9369200000000001  | 7.0730900000000000  |
| C  | 9.7879900000000001  | 16.4695100000000000 | 8.1983999999999999  |
| C  | 7.5066200000000000  | 14.5626400000000000 | 7.5975700000000000  |
| C  | 12.3959499999999999 | 5.6935800000000000  | 8.5556800000000001  |
| C  | 14.1887000000000001 | 8.0170100000000001  | 9.3330500000000000  |
| C  | 9.5178700000000000  | 5.5730200000000000  | 7.3749900000000000  |
| C  | 12.6892499999999999 | 16.4085399999999999 | 7.0816100000000000  |
| C  | 7.7678500000000000  | 7.6750400000000000  | 6.0153900000000000  |
| C  | 16.4565100000000002 | 12.4207800000000001 | 6.6911400000000000  |
| C  | 16.4286199999999999 | 9.6193000000000001  | 8.0506100000000001  |
| C  | 14.2318000000000000 | 14.2118699999999999 | 5.6032300000000000  |
| C  | 5.5713300000000000  | 12.3348499999999999 | 8.2751900000000000  |
| C  | 5.5933800000000000  | 9.3737100000000001  | 7.3356700000000000  |
| N  | 10.9843200000000000 | 13.0401900000000001 | 7.1742400000000000  |
| N  | 10.9933700000000001 | 9.0523700000000000  | 7.5134500000000000  |
| N  | 12.9940900000000000 | 11.0479000000000000 | 7.3571200000000000  |
| N  | 8.9809300000000001  | 11.0456500000000000 | 7.2883800000000000  |
| O  | 11.0255700000000000 | 10.8599999999999999 | 5.1622500000000000  |
| H  | 10.3566699999999999 | 11.4430499999999999 | 4.7557800000000000  |
| H  | 9.0925900000000000  | 16.1953900000000000 | 9.0022699999999999  |
| H  | 10.5481000000000000 | 17.1295399999999999 | 8.6426700000000001  |
| H  | 9.2268399999999999  | 17.0808600000000001 | 7.4699300000000000  |
| H  | 6.6140600000000000  | 14.2145600000000001 | 7.0686200000000000  |
| H  | 7.1888300000000000  | 14.8943700000000000 | 8.6003700000000000  |
| H  | 7.8607300000000000  | 15.4448200000000000 | 7.0558900000000000  |
| H  | 12.4681400000000000 | 5.6256100000000000  | 9.6542999999999999  |
| H  | 11.9327500000000000 | 4.7622600000000000  | 8.2040700000000000  |
| H  | 13.4231300000000000 | 5.7037900000000000  | 8.1639100000000000  |
| H  | 14.8318300000000000 | 8.6978600000000000  | 9.9025400000000000  |
| H  | 13.5693699999999999 | 7.4843800000000000  | 10.0642300000000000 |
| H  | 14.8427700000000000 | 7.2716100000000000  | 8.8522200000000001  |
| H  | 9.3914100000000000  | 5.2561900000000000  | 6.3266200000000000  |
| H  | 9.9793699999999999  | 4.7354500000000000  | 7.9144700000000000  |
| H  | 8.5098000000000000  | 5.7036900000000000  | 7.7962000000000000  |
| H  | 12.2847700000000000 | 17.2489400000000001 | 7.6632600000000000  |
| H  | 13.6807200000000001 | 16.1699100000000002 | 7.4944400000000000  |
| H  | 12.8456200000000000 | 16.7829900000000002 | 6.0557400000000000  |
| H  | 8.3773599999999999  | 7.0264900000000000  | 5.3735300000000000  |
| H  | 7.1356900000000000  | 7.0227900000000000  | 6.6385900000000000  |
| H  | 7.1018100000000000  | 8.2416699999999999  | 5.3526900000000000  |
| H  | 16.4282499999999998 | 13.4423600000000001 | 7.0998100000000000  |
| H  | 17.3522900000000000 | 11.9399400000000000 | 7.1056400000000000  |
| H  | 16.6076000000000001 | 12.5124099999999999 | 5.6030900000000000  |
| H  | 16.6741600000000001 | 9.6482100000000001  | 9.1259599999999999  |
| H  | 16.3185199999999999 | 8.5617699999999999  | 7.7722500000000000  |
| H  | 17.3058100000000001 | 9.9987499999999999  | 7.5094900000000000  |

|   |                    |                    |                   |
|---|--------------------|--------------------|-------------------|
| H | 14.973039999999999 | 14.817840000000000 | 6.148320000000000 |
| H | 14.780870000000000 | 13.593040000000000 | 4.881830000000000 |
| H | 13.607970000000000 | 14.900430000000000 | 5.020560000000000 |
| H | 4.891920000000000  | 11.607480000000001 | 8.743420000000000 |
| H | 5.853990000000000  | 13.054800000000000 | 9.054100000000000 |
| H | 4.977910000000000  | 12.880920000000000 | 7.521100000000000 |
| H | 5.804790000000000  | 8.427440000000001  | 7.856070000000000 |
| H | 4.742090000000000  | 9.845330000000001  | 7.845400000000000 |
| H | 5.248110000000000  | 9.115399999999999  | 6.320870000000000 |

Transition Metal: Cr; Functional Group: CH3; Adsorbate: OOH

|    |                    |                    |                    |
|----|--------------------|--------------------|--------------------|
| Cr | 10.978960000000001 | 11.002700000000001 | 6.767510000000000  |
| C  | 10.466150000000001 | 15.212300000000001 | 7.599060000000000  |
| C  | 9.955460000000000  | 13.846190000000000 | 7.521240000000000  |
| C  | 8.605890000000000  | 13.439760000000000 | 7.667350000000000  |
| C  | 11.578210000000000 | 6.930870000000000  | 8.106019999999999  |
| C  | 11.980630000000000 | 8.335500000000000  | 8.057330000000000  |
| C  | 13.243520000000000 | 8.858390000000000  | 8.428129999999999  |
| C  | 10.348800000000001 | 6.841220000000000  | 7.468350000000000  |
| C  | 9.956619999999999  | 8.203630000000000  | 7.125410000000000  |
| C  | 11.754870000000000 | 15.192190000000000 | 7.086220000000000  |
| C  | 8.671670000000001  | 8.624689999999999  | 6.709570000000000  |
| C  | 15.170349999999999 | 11.619410000000000 | 6.993730000000000  |
| C  | 12.071199999999999 | 13.799659999999999 | 6.809430000000000  |
| C  | 13.785349999999999 | 12.034190000000001 | 6.812350000000000  |
| C  | 15.139239999999999 | 10.431979999999999 | 7.714350000000000  |
| C  | 13.735120000000000 | 10.073779999999999 | 7.883260000000000  |
| C  | 13.336150000000000 | 13.307390000000000 | 6.390610000000000  |
| C  | 6.813710000000000  | 11.598929999999999 | 7.723760000000000  |
| C  | 8.183669999999999  | 12.088480000000001 | 7.600980000000000  |
| C  | 6.814390000000000  | 10.278829999999999 | 7.296410000000000  |
| C  | 8.200110000000000  | 9.925459999999999  | 7.032370000000000  |
| C  | 9.833119999999999  | 16.409179999999999 | 8.268649999999999  |
| C  | 7.535890000000000  | 14.525510000000001 | 7.684810000000000  |
| C  | 12.364129999999999 | 5.755330000000000  | 8.630210000000000  |
| C  | 14.085050000000001 | 8.120880000000000  | 9.458930000000001  |
| C  | 9.543229999999999  | 5.579120000000000  | 7.296610000000000  |
| C  | 12.681760000000001 | 16.378060000000001 | 7.013650000000000  |
| C  | 7.775390000000000  | 7.679940000000000  | 5.926400000000000  |
| C  | 16.419720000000002 | 12.359299999999999 | 6.589790000000000  |
| C  | 16.354710000000001 | 9.631150000000000  | 8.110450000000000  |
| C  | 14.206610000000000 | 14.179500000000001 | 5.501230000000000  |
| C  | 5.625300000000000  | 12.286880000000000 | 8.353610000000000  |
| C  | 5.612770000000000  | 9.369600000000000  | 7.285090000000000  |
| N  | 10.990539999999999 | 12.997080000000000 | 7.134220000000000  |
| N  | 10.973739999999999 | 9.080719999999999  | 7.460570000000000  |
| N  | 12.938050000000000 | 11.059419999999999 | 7.322260000000000  |
| N  | 9.018219999999999  | 11.019280000000000 | 7.274240000000000  |
| H  | 9.160250000000000  | 16.114470000000001 | 9.084160000000001  |
| H  | 10.608630000000000 | 17.052900000000001 | 8.710440000000000  |
| H  | 9.253679999999999  | 17.043350000000000 | 7.574800000000000  |
| H  | 6.634260000000000  | 14.188560000000001 | 7.164470000000000  |
| H  | 7.236140000000000  | 14.837870000000001 | 8.699159999999999  |
| H  | 7.880490000000000  | 15.417420000000000 | 7.153620000000000  |
| H  | 12.397720000000000 | 5.719990000000000  | 9.732010000000001  |
| H  | 11.923750000000000 | 4.808370000000000  | 8.290720000000000  |
| H  | 13.405090000000000 | 5.766280000000000  | 8.275610000000000  |
| H  | 14.703640000000000 | 8.831670000000001  | 10.019909999999999 |
| H  | 13.434770000000000 | 7.623740000000000  | 10.189270000000000 |
| H  | 14.759209999999999 | 7.353410000000000  | 9.045059999999999  |
| H  | 9.446470000000000  | 5.276990000000000  | 6.240830000000000  |
| H  | 10.004519999999999 | 4.739940000000000  | 7.833790000000000  |
| H  | 8.523380000000000  | 5.689030000000000  | 7.695170000000000  |
| H  | 12.286160000000001 | 17.221180000000000 | 7.596860000000000  |
| H  | 13.683389999999999 | 16.148260000000001 | 7.406330000000000  |
| H  | 12.814050000000000 | 16.744219999999999 | 5.981640000000000  |
| H  | 8.384280000000000  | 7.030350000000000  | 5.284800000000000  |
| H  | 7.135550000000000  | 7.027340000000000  | 6.541930000000000  |
| H  | 7.116050000000000  | 8.253660000000000  | 5.262760000000000  |
| H  | 16.427050000000001 | 13.390900000000000 | 6.973660000000000  |
| H  | 17.315829999999998 | 11.867000000000001 | 6.989730000000000  |
| H  | 16.541440000000001 | 12.421189999999999 | 5.496150000000000  |
| H  | 16.584320000000002 | 9.704120000000000  | 9.187030000000000  |
| H  | 16.235779999999998 | 8.563620000000000  | 7.876520000000000  |
| H  | 17.244430000000001 | 9.977670000000000  | 7.567630000000000  |
| H  | 14.957640000000000 | 14.783049999999999 | 6.036020000000000  |
| H  | 14.745609999999999 | 13.555790000000000 | 4.776130000000000  |

|   |                     |                     |                    |
|---|---------------------|---------------------|--------------------|
| H | 13.5803100000000001 | 14.8696000000000000 | 4.9229000000000000 |
| H | 4.9621700000000000  | 11.5463299999999999 | 8.8247599999999999 |
| H | 5.9270900000000000  | 12.9897700000000000 | 9.1404700000000001 |
| H | 5.0090900000000000  | 12.8475300000000001 | 7.6289500000000000 |
| H | 5.8098300000000000  | 8.4112200000000000  | 7.7888100000000000 |
| H | 4.7611000000000000  | 9.8392199999999999  | 7.7958500000000000 |
| H | 5.2753900000000000  | 9.1349300000000001  | 6.2620600000000000 |
| O | 11.013287972251931  | 10.830835541125742  | 4.884649092206509  |
| H | 9.665888519898251   | 9.804319029914200   | 4.001822350057872  |
| O | 9.784535828437376   | 10.775046021019110  | 4.074775149238836  |

Transition Metal: Cr; Functional Group: F; Adsorbate: Clean

|    |                    |                    |                    |
|----|--------------------|--------------------|--------------------|
| Cr | 0.000000000000000  | 0.000127946849674  | -0.002768402677332 |
| C  | 0.686444722655824  | 4.272685549164894  | -0.002657241600559 |
| C  | 1.114731036491644  | 2.895702771740396  | -0.002502216137136 |
| C  | 2.438780289494968  | 2.438841940090332  | -0.001231768321412 |
| C  | -0.686429674745767 | -4.272588458215207 | -0.002687980468853 |
| C  | -1.114703932102984 | -2.895608521458524 | -0.002900560384170 |
| C  | -2.438747472496765 | -2.438769688030003 | -0.000666092840362 |
| C  | 0.686429674745768  | -4.272588458215207 | -0.002687980468853 |
| C  | 1.114703932102986  | -2.895608521458524 | -0.002900560384170 |
| C  | -0.686444722655818 | 4.272685549164894  | -0.002657241600559 |
| C  | 2.438747472496768  | -2.438769688030003 | -0.000666092840362 |
| C  | -4.272486676395548 | 0.686386718942832  | 0.002110235456394  |
| C  | -1.114731036491644 | 2.895702771740396  | -0.002502216137136 |
| C  | -2.895495113162291 | 1.114750373750500  | 0.000474213884566  |
| C  | -4.272433696328612 | -0.686464135468583 | 0.002100694598548  |
| C  | -2.895455693137261 | -1.114725940511001 | 0.000752808569302  |
| C  | -2.438780289494964 | 2.438841940090332  | -0.001231768321412 |
| C  | 4.272486676395542  | 0.686386718942832  | 0.002110235456394  |
| C  | 2.895495113162296  | 1.114750373750500  | 0.000474213884566  |
| C  | 4.272433696328606  | -0.686464135468583 | 0.002100694598548  |
| C  | 2.895455693137258  | -1.114725940511001 | 0.000752808569302  |
| N  | 0.000000000000000  | 2.062746707574824  | -0.003273486796862 |
| N  | 0.000000000000000  | -2.062611691194153 | -0.003860435194802 |
| N  | -2.062516674276441 | 0.000019765045250  | 0.000254617515062  |
| N  | 2.062516674276432  | 0.000019765045250  | 0.000254617515062  |
| F  | 5.362227830682306  | -1.474784494000925 | 0.000943255084568  |
| F  | -5.362516053914394 | 1.474415645898296  | 0.001029831125044  |
| F  | -5.362227830682304 | -1.474784494000925 | 0.000943255084568  |
| F  | -1.474740934887702 | 5.362498928465848  | -0.001737413546920 |
| F  | 1.474740934887696  | 5.362498928465848  | -0.001737413546920 |
| F  | 5.362516053914396  | 1.474415645898296  | 0.001029831125044  |
| F  | -1.474773952047293 | -5.362376085780376 | -0.001473559681969 |
| F  | 1.474773952047296  | -5.362376085780376 | -0.001473559681969 |
| F  | -3.403927512745597 | 3.403769555060228  | -0.000949384290530 |
| F  | 3.403927512745610  | 3.403769555060228  | -0.000949384290530 |
| F  | -3.403900634933418 | -3.403675406309063 | 0.000936723372662  |
| F  | 3.403900634933414  | -3.403675406309063 | 0.000936723372662  |

Transition Metal: Cr; Functional Group: F; Adsorbate: O

|    |                    |                    |                    |
|----|--------------------|--------------------|--------------------|
| Cr | 0.000000000000000  | -0.001021819993447 | 0.465961670578424  |
| C  | 0.685687296939738  | 4.245573332829212  | -0.013363604972602 |
| C  | 1.108253671362150  | 2.868810994240356  | -0.006446191450368 |
| C  | 2.432286046392846  | 2.428611543256712  | -0.001301626763380 |
| C  | -0.685688301042763 | -4.247341191762558 | -0.014569887977164 |
| C  | -1.108264578543242 | -2.870578037668963 | -0.007546543205466 |
| C  | -2.432297884568431 | -2.430347544467232 | -0.002049261899986 |
| C  | 0.685688301042764  | -4.247341191762558 | -0.014569887977164 |
| C  | 1.108264578543242  | -2.870578037668963 | -0.007546543205466 |
| C  | -0.685687296939747 | 4.245573332829212  | -0.013363604972602 |
| C  | 2.432297884568434  | -2.430347544467232 | -0.002049261899986 |
| C  | -4.254415918768533 | 0.684711428450864  | -0.014209597460649 |
| C  | -1.108253671362288 | 2.868810994240356  | -0.006446191450368 |
| C  | -2.876799181553441 | 1.106371678055146  | -0.000276598179475 |
| C  | -4.254437032680691 | -0.686389694002777 | -0.014474635390091 |
| C  | -2.876840362494939 | -1.108109781341639 | -0.000673662669929 |
| C  | -2.432286046392843 | 2.428611543256712  | -0.001301626763380 |
| C  | 4.254415918768536  | 0.684711428450864  | -0.014209597460649 |
| C  | 2.876799181553306  | 1.106371678055146  | -0.000276598179475 |
| C  | 4.254437032680694  | -0.686389694002777 | -0.014474635390091 |
| C  | 2.876840362494932  | -1.108109781341639 | -0.000673662669929 |
| N  | 0.000000000000000  | 2.024106614994266  | -0.004832664924538 |
| N  | 0.000000000000000  | -2.025889124043800 | -0.005889221722534 |
| N  | -2.033572679154251 | -0.000882597479116 | 0.008255698937040  |
| N  | 2.033572679154250  | -0.000882597479116 | 0.008255698937040  |
| F  | 5.340626201075152  | -1.477763479012957 | -0.030153300885686 |
| F  | -5.340555684631148 | 1.476201984707332  | -0.029519072548911 |
| F  | -5.340626201075144 | -1.477763479012957 | -0.030153300885686 |
| F  | -1.475913913071516 | 5.332690521609074  | -0.019156122947347 |
| F  | 1.475913913071374  | 5.332690521609074  | -0.019156122947347 |
| F  | 5.340555684631154  | 1.476201984707332  | -0.029519072548911 |
| F  | -1.475883589551387 | -5.334477943107913 | -0.020220196354927 |
| F  | 1.475883589551390  | -5.334477943107913 | -0.020220196354927 |
| F  | -3.393779907495080 | 3.393607035766452  | -0.002503840006570 |
| F  | 3.393779907495072  | 3.393607035766452  | -0.002503840006570 |
| F  | -3.393805449609474 | -3.395342848656256 | -0.003058744147432 |
| F  | 3.393805449609474  | -3.395342848656256 | -0.003058744147432 |
| O  | 0.000000000000000  | -0.001506473788130 | 2.056164591913828  |

Transition Metal: Cr; Functional Group: F; Adsorbate: OH

|    |                    |                    |                    |
|----|--------------------|--------------------|--------------------|
| Cr | 0.000000000000000  | 0.001771992390000  | 0.270129700799952  |
| C  | 0.686682536320642  | 4.266116123198758  | -0.014787767746611 |
| C  | 1.114744634418170  | 2.890486389098266  | 0.000688177508986  |
| C  | 2.439380410170998  | 2.436431353240454  | 0.000698057926304  |
| C  | -0.686341751308724 | -4.265556874879255 | -0.012860678960863 |
| C  | -1.112701709106179 | -2.888594955593391 | -0.001764554696628 |
| C  | -2.436802758766280 | -2.434792854459413 | 0.003666507697086  |
| C  | 0.686341751308716  | -4.265556874879255 | -0.012860678960863 |
| C  | 1.112701709106176  | -2.888594955593391 | -0.001764554696628 |
| C  | -0.686682536320639 | 4.266116123198758  | -0.014787767746611 |
| C  | 2.436802758766278  | -2.434792854459413 | 0.003666507697086  |
| C  | -4.271019413286254 | 0.685707804088858  | -0.007271696070287 |
| C  | -1.114744634418162 | 2.890486389098266  | 0.000688177508986  |
| C  | -2.892959540456744 | 1.113177937868444  | -0.008152088763872 |
| C  | -4.269603491319703 | -0.685889020884133 | -0.005247631613617 |
| C  | -2.890721100712767 | -1.111339422292318 | -0.004667105958358 |
| C  | -2.439380410171005 | 2.436431353240454  | 0.000698057926304  |
| C  | 4.271019413286248  | 0.685707804088858  | -0.007271696070287 |
| C  | 2.892959540456744  | 1.113177937868444  | -0.008152088763872 |
| C  | 4.269603491319700  | -0.685889020884133 | -0.005247631613617 |
| C  | 2.890721100712762  | -1.111339422292318 | -0.004667105958358 |
| N  | 0.000000000000000  | 2.055794760655558  | 0.007930797471698  |
| N  | 0.000000000000000  | -2.055304236246688 | -0.000827868774490 |
| N  | -2.058112030073353 | 0.001352780869144  | -0.014493630879816 |
| N  | 2.058112030073358  | 0.001352780869144  | -0.014493630879816 |
| F  | 5.356598260106322  | -1.476991535105881 | -0.010076657769673 |
| F  | -5.359314367582563 | 1.475471679736618  | -0.012915348055319 |
| F  | -5.356598260106320 | -1.476991535105881 | -0.010076657769673 |
| F  | -1.474592322712326 | 5.355341297165138  | -0.032837930328608 |
| F  | 1.474592322712318  | 5.355341297165138  | -0.032837930328608 |
| F  | 5.359314367582559  | 1.475471679736618  | -0.012915348055319 |
| F  | -1.475096165168416 | -5.354046279048141 | -0.028858991464585 |
| F  | 1.475096165168420  | -5.354046279048141 | -0.028858991464585 |
| F  | -3.402122696549789 | 3.401853923277204  | 0.001423205446602  |
| F  | 3.402122696549786  | 3.401853923277204  | 0.001423205446602  |
| F  | -3.400000717843934 | -3.399050981693975 | 0.006111885826050  |
| F  | 3.400000717843932  | -3.399050981693975 | 0.006111885826050  |
| H  | 0.000000000000000  | 0.876102185757710  | 2.505671541537020  |
| O  | 0.000000000000000  | -0.020599431729138 | 2.119418324771596  |



Transition Metal: Cr; Functional Group: F; Adsorbate: OOH

|    |                    |                    |                    |
|----|--------------------|--------------------|--------------------|
| Cr | 0.001667870020656  | 0.031337576241868  | 0.292642911255458  |
| C  | 0.691484890297166  | 4.302068394289241  | -0.013239330120328 |
| C  | 1.118068271266036  | 2.924241584623150  | -0.003540071450604 |
| C  | 2.442413764070022  | 2.470945351655412  | -0.000065097550186 |
| C  | -0.680264892437428 | -4.232207311586730 | -0.002025934792506 |
| C  | -1.106901798975667 | -2.854798175670005 | 0.006949888452290  |
| C  | -2.430303052516610 | -2.401787231299672 | 0.011378673721804  |
| C  | 0.691943492559890  | -4.232313765505417 | 0.000124293558008  |
| C  | 1.117746404325828  | -2.854467243822953 | 0.009690022340678  |
| C  | -0.680687159447242 | 4.302269396309105  | -0.010320356492248 |
| C  | 2.441231878972268  | -2.400711433288819 | 0.012978740147532  |
| C  | -4.263949278292383 | 0.720851127584168  | -0.014762133772694 |
| C  | -1.107495493917515 | 2.924704683244354  | 0.000756958017478  |
| C  | -2.887311932435917 | 1.148940541693076  | 0.001633688036198  |
| C  | -4.262481872699173 | -0.652137920323952 | -0.014540352442334 |
| C  | -2.885208866890657 | -1.078025235704480 | 0.003403822321220  |
| C  | -2.431944159950973 | 2.472328999811146  | 0.005715115899560  |
| C  | 4.274091342748658  | 0.719412893125470  | -0.013681031477269 |
| C  | 2.896337943722260  | 1.147187973582742  | -0.006763317670305 |
| C  | 4.272773727049330  | -0.652741026162786 | -0.007791714205514 |
| C  | 2.894657238438766  | -1.076912563442878 | 0.001871281471876  |
| N  | 0.005661636721588  | 2.090920137676484  | 0.000417723103942  |
| N  | 0.004864353856088  | -2.021341292026253 | 0.009986878226490  |
| N  | -2.052974544085206 | 0.035579219109116  | 0.010814357362202  |
| N  | 2.062220921940612  | 0.035919368561394  | -0.003781068175268 |
| F  | 5.359752694647004  | -1.443939266414027 | -0.017231816808611 |
| F  | -5.354354681655554 | 1.507809970889000  | -0.034270808726507 |
| F  | -5.350605432593982 | -1.442090404263080 | -0.034152740679115 |
| F  | -1.470077998836071 | 5.390952118092533  | -0.024090319835604 |
| F  | 1.479992958847036  | 5.390657959561111  | -0.029477385116671 |
| F  | 5.363414333719351  | 1.507264435440182  | -0.028556490655220 |
| F  | -1.469593275036342 | -5.320286069024508 | -0.017209895006884 |
| F  | 1.481606146277270  | -5.320286130361234 | -0.015093182254402 |
| F  | -3.396352682278469 | 3.436507296103218  | 0.003655726497786  |
| F  | 3.405992253062900  | 3.434756212211634  | 0.001059341173476  |
| F  | -3.394212255176964 | -3.365405578506962 | 0.008794369380252  |
| F  | 3.404612115113278  | -3.364719660942793 | 0.015923879078620  |
| H  | -1.441163427978577 | -0.208420504430148 | 3.203899482070654  |
| O  | 0.112106612189664  | 0.139406439096570  | 2.158163260758064  |
| O  | -0.756824548482506 | -0.813952773410151 | 2.844815154780918  |

Transition Metal: Cr; Functional Group: H; Adsorbate: Clean

|    |                    |                    |                    |
|----|--------------------|--------------------|--------------------|
| Cr | 0.000000000000000  | -0.000419450774408 | 0.004263861611150  |
| C  | 0.686258318304940  | 4.264944496162618  | -0.008630458198677 |
| C  | 1.111225108148728  | 2.880442176457790  | -0.005069024851562 |
| C  | 2.442133197371728  | 2.441989580932540  | -0.001037933605156 |
| C  | -0.686188200936453 | -4.264982968514303 | -0.005673838090985 |
| C  | -1.111213049258939 | -2.880671533741580 | 0.000316999410258  |
| C  | -2.442226758736091 | -2.442182452580390 | 0.001104675986510  |
| C  | 0.686188200936466  | -4.264982968514303 | -0.005673838090985 |
| C  | 1.111213049258938  | -2.880671533741580 | 0.000316999410258  |
| C  | -0.686258318304944 | 4.264944496162618  | -0.008630458198677 |
| C  | 2.442226758736096  | -2.442182452580390 | 0.001104675986510  |
| C  | -4.265378469941606 | 0.686497532270148  | 0.005073074253538  |
| C  | -1.111225108148734 | 2.880442176457790  | -0.005069024851562 |
| C  | -2.880953562797785 | 1.111261444948100  | 0.005277550058048  |
| C  | -4.265600472550711 | -0.685973076669637 | 0.004221437812494  |
| C  | -2.881144468402120 | -1.111311763192468 | 0.005174681277102  |
| C  | -2.442133197371728 | 2.441989580932540  | -0.001037933605156 |
| C  | 4.265378469941608  | 0.686497532270148  | 0.005073074253538  |
| C  | 2.880953562797784  | 1.111261444948100  | 0.005277550058048  |
| C  | 4.265600472550714  | -0.685973076669637 | 0.004221437812494  |
| C  | 2.881144468402124  | -1.111311763192468 | 0.005174681277102  |
| N  | 0.000000000000000  | 2.048573446377900  | -0.003270697876078 |
| N  | 0.000000000000000  | -2.048803121113007 | 0.004085918374438  |
| N  | -2.049219478213015 | -0.000119034670338 | 0.007012361188244  |
| N  | 2.049219478213018  | -0.000119034670338 | 0.007012361188244  |
| H  | 5.122363168345104  | -1.357354475877500 | 0.000622303555502  |
| H  | -5.121821618183498 | 1.358350128808392  | 0.002029699014208  |
| H  | -5.122363168345100 | -1.357354475877500 | 0.000622303555502  |
| H  | -1.358019637405082 | 5.121487743504316  | -0.009565344732440 |
| H  | 1.358019637405086  | 5.121487743504316  | -0.009565344732440 |
| H  | 5.121821618183500  | 1.358350128808392  | 0.002029699014208  |
| H  | -1.357866531097756 | -5.121410855717443 | -0.010219974312342 |
| H  | 1.357866531097748  | -5.121410855717443 | -0.010219974312342 |
| H  | -3.214376760400476 | 3.214349553808892  | -0.002383799630702 |
| H  | 3.214376760400474  | 3.214349553808892  | -0.002383799630702 |
| H  | -3.214523805769652 | -3.214781933174262 | -0.003946950189054 |
| H  | 3.214523805769652  | -3.214781933174262 | -0.003946950189054 |

Transition Metal: Cr; Functional Group: H; Adsorbate: O

|    |                    |                     |                    |
|----|--------------------|---------------------|--------------------|
| Cr | 0.000000000000000  | -0.000322412140704  | 0.517886593167952  |
| C  | 0.685446528215480  | 4.231982076870348   | -0.040040690775530 |
| C  | 1.105047215987836  | 2.849491330969708   | 0.005691598097892  |
| C  | 2.436524023677740  | 2.430787680353356   | 0.012829159457134  |
| C  | -0.685405329935687 | -4.233843188411727  | -0.039554117356321 |
| C  | -1.104936515308736 | -2.851400650493009  | 0.007790971624056  |
| C  | -2.436404633540032 | -2.4327444493827670 | 0.013387202703900  |
| C  | 0.685405329935688  | -4.233843188411727  | -0.039554117356321 |
| C  | 1.104936515308734  | -2.851400650493009  | 0.007790971624056  |
| C  | -0.685446528215479 | 4.231982076870348   | -0.040040690775530 |
| C  | 2.436404633540038  | -2.4327444493827670 | 0.013387202703900  |
| C  | -4.248127538088291 | 0.684209277603836   | -0.021900838033233 |
| C  | -1.105047215987835 | 2.849491330969708   | 0.005691598097892  |
| C  | -2.863864034365932 | 1.102816966794566   | 0.023780978806416  |
| C  | -4.247917482432674 | -0.686308357575463  | -0.022668126816185 |
| C  | -2.863647774268298 | -1.104729748818457  | 0.023374887708960  |
| C  | -2.436524023677734 | 2.430787680353356   | 0.012829159457134  |
| C  | 4.248127538088282  | 0.684209277603836   | -0.021900838033233 |
| C  | 2.863864034365924  | 1.102816966794566   | 0.023780978806416  |
| C  | 4.247917482432678  | -0.686308357575463  | -0.022668126816185 |
| C  | 2.863647774268290  | -1.104729748818457  | 0.023374887708960  |
| N  | 0.000000000000000  | 2.008317791225842   | 0.030656620846892  |
| N  | 0.000000000000000  | -2.010064681394081  | 0.033952356924806  |
| N  | -2.024134235411051 | -0.000881068249732  | 0.054799039757594  |
| N  | 2.024134235411054  | -0.000881068249732  | 0.054799039757594  |
| H  | 5.100092278190528  | -1.362663499919631  | -0.059142359175084 |
| H  | -5.100684998681345 | 1.359974619097768   | -0.056814217533663 |
| H  | -5.100092278190530 | -1.362663499919631  | -0.059142359175084 |
| H  | -1.361901557012764 | 5.084297480084988   | -0.071307494633878 |
| H  | 1.361901557012762  | 5.084297480084988   | -0.071307494633878 |
| H  | 5.100684998681349  | 1.359974619097768   | -0.056814217533663 |
| H  | -1.361777905277300 | -5.086107338054454  | -0.073277108564870 |
| H  | 1.361777905277308  | -5.086107338054454  | -0.073277108564870 |
| H  | -3.205137058792587 | 3.206030675433044   | -0.009923068766734 |
| H  | 3.205137058792594  | 3.206030675433044   | -0.009923068766734 |
| H  | -3.205093909671699 | -3.207957307787712  | -0.010211030695442 |
| H  | 3.205093909671700  | -3.207957307787712  | -0.010211030695442 |
| O  | 0.000000000000000  | 0.002540394169604   | 2.112744857449812  |

Transition Metal: Cr; Functional Group: H; Adsorbate: OH

|    |                    |                    |                    |
|----|--------------------|--------------------|--------------------|
| Cr | 0.000000000000000  | -0.000362544504566 | 0.307291466263196  |
| C  | 0.686452807326246  | 4.256299498428650  | -0.025321155604960 |
| C  | 1.110715469202172  | 2.874302522113232  | 0.018867291509508  |
| C  | 2.441309767844992  | 2.438371264658568  | 0.012569178233050  |
| C  | -0.685997914111031 | -4.257687656215865 | -0.022806322775910 |
| C  | -1.109010835639033 | -2.873879401381902 | 0.013963938882372  |
| C  | -2.439193468881310 | -2.438609807515078 | 0.012901131515204  |
| C  | 0.685997914111032  | -4.257687656215865 | -0.022806322775910 |
| C  | 1.109010835639038  | -2.873879401381902 | 0.013963938882372  |
| C  | -0.686452807326255 | 4.256299498428650  | -0.025321155604960 |
| C  | 2.439193468881304  | -2.438609807515078 | 0.012901131515204  |
| C  | -4.260083293777308 | 0.684651012031308  | -0.026749297741450 |
| C  | -1.110715469202173 | 2.874302522113232  | 0.018867291509508  |
| C  | -2.874931555319137 | 1.108710010604164  | 0.006265779868048  |
| C  | -4.258750014579714 | -0.686100716291051 | -0.025523849392734 |
| C  | -2.873118783128994 | -1.108699583015355 | 0.007944728154614  |
| C  | -2.441309767844999 | 2.438371264658568  | 0.012569178233050  |
| C  | 4.260083293777305  | 0.684651012031308  | -0.026749297741450 |
| C  | 2.874931555319130  | 1.108710010604164  | 0.006265779868048  |
| C  | 4.258750014579724  | -0.686100716291051 | -0.025523849392734 |
| C  | 2.873118783128996  | -1.108699583015355 | 0.007944728154614  |
| N  | 0.000000000000000  | 2.040879007798122  | 0.046235420495928  |
| N  | 0.000000000000000  | -2.041779261129406 | 0.033906101999206  |
| N  | -2.041509539285535 | 0.000222138732964  | 0.021782187018022  |
| N  | 2.041509539285538  | 0.000222138732964  | 0.021782187018022  |
| H  | 5.112517327223158  | -1.360761341236742 | -0.049487461128933 |
| H  | -5.114873668066547 | 1.357970900422566  | -0.051352812288293 |
| H  | -5.112517327223166 | -1.360761341236742 | -0.049487461128933 |
| H  | -1.359345498985078 | 5.111162816858922  | -0.061444965816946 |
| H  | 1.359345498985072  | 5.111162816858922  | -0.061444965816946 |
| H  | 5.114873668066540  | 1.357970900422566  | -0.051352812288293 |
| H  | -1.359348284475768 | -5.112422709793638 | -0.050820290746113 |
| H  | 1.359348284475756  | -5.112422709793638 | -0.050820290746113 |
| H  | -3.213423481326988 | 3.210494413719720  | -0.006051987730772 |
| H  | 3.213423481326990  | 3.210494413719720  | -0.006051987730772 |
| H  | -3.211675090967894 | -3.210408369302836 | -0.000318390119310 |
| H  | 3.211675090967892  | -3.210408369302836 | -0.000318390119310 |
| H  | 0.000000000000000  | 0.899895268189116  | 2.519849067193206  |
| O  | 0.000000000000000  | -0.008742455988276 | 2.163512540377058  |

Transition Metal: Cr; Functional Group: H; Adsorbate: OOH

|    |                    |                    |                     |
|----|--------------------|--------------------|---------------------|
| Cr | -0.003047340038738 | -0.000954525723504 | 0.328443913536114   |
| C  | 0.678854533958882  | 4.261178211720366  | -0.026793618454803  |
| C  | 1.100774232950206  | 2.876346052491716  | 0.020598981516826   |
| C  | 2.430460785861896  | 2.441347888053102  | 0.020202877928070   |
| C  | -0.694959068788496 | -4.257050682895049 | -0.024024478850052  |
| C  | -1.118770763203120 | -2.872387388663814 | 0.020734782401432   |
| C  | -2.447606233098156 | -2.436397698395265 | 0.013734610396242   |
| C  | 0.675945292761098  | -4.256826311189100 | -0.018305385145496  |
| C  | 1.099210610635320  | -2.872156483501577 | 0.028801276482754   |
| C  | -0.692386726104488 | 4.263330920662334  | -0.031470415807853  |
| C  | 2.428836698927336  | -2.438167091187875 | 0.028185555435250   |
| C  | -4.264488745773090 | 0.689362791154860  | -0.040591881423261  |
| C  | -1.117649235352431 | 2.879195973746556  | 0.013616875437672   |
| C  | -2.881621513533027 | 1.113068513470422  | 0.004723190135556   |
| C  | -4.263357834783774 | -0.682975058915709 | -0.039315585596142  |
| C  | -2.880522504971342 | -1.105298677684747 | 0.007823194671660   |
| C  | -2.447954656436913 | 2.444557015062690  | 0.008843714824958   |
| C  | 4.249577951638682  | 0.686893879385922  | -0.018364688578806  |
| C  | 2.866130467526822  | 1.110753528118882  | 0.013541987315904   |
| C  | 4.249004561451367  | -0.685417027035133 | -0.0154431111107551 |
| C  | 2.865194968859022  | -1.107780508776383 | 0.018349295723162   |
| N  | -0.009677883337920 | 2.045450307824916  | 0.044728781613902   |
| N  | -0.010305275319114 | -2.040636422912506 | 0.051705950931900   |
| N  | -2.048371283324911 | 0.004079256625568  | 0.032416399581820   |
| N  | 2.034608658317892  | 0.001899947992950  | 0.027071252253396   |
| H  | 5.103699391294048  | -1.359145008074318 | -0.037820601988216  |
| H  | -5.119286092829405 | 1.362001103559982  | -0.077716391650064  |
| H  | -5.117322072947896 | -1.356894458747142 | -0.073762430516005  |
| H  | -1.364454729294302 | 5.118662737985584  | -0.072620932139081  |
| H  | 1.353785492010994  | 5.114461412214956  | -0.061839533603237  |
| H  | 5.104898133318629  | 1.359667296705914  | -0.043249366075308  |
| H  | -1.368114827382051 | -5.111501896423301 | -0.062762702517109  |
| H  | 1.350031321307572  | -5.110711323847308 | -0.051203955142419  |
| H  | -3.220703275499027 | 3.216159163238684  | -0.015458540247450  |
| H  | 3.202819439381250  | 3.213561770800054  | 0.006321037092108   |
| H  | -3.220884539358483 | -3.207359031852121 | -0.008198659899880  |
| H  | 3.200718565017276  | -3.210799021732512 | 0.016246214731882   |
| H  | -1.240178950474263 | 0.623426462207324  | 3.185044942459680   |
| O  | 0.275564874463370  | 0.031724622089222  | 2.186073405925338   |
| O  | -0.935452427830629 | -0.279250237554475 | 2.948424038346576   |

## Transition Metal: Cr; Functional Group: NH2; Adsorbate: Clean

|    |                    |                    |                    |
|----|--------------------|--------------------|--------------------|
| Cr | 0.038703894490450  | -0.017085711120310 | -0.057675174410788 |
| C  | 0.883745696264564  | 4.213795300898628  | -0.383577896510802 |
| C  | 1.253158304235300  | 2.816593234042594  | -0.365451231003206 |
| C  | 2.576075918648402  | 2.305997417770592  | -0.459324676226604 |
| C  | -0.791526688488954 | -4.251081819226366 | -0.213358871469312 |
| C  | -1.175428368296828 | -2.858864608764932 | -0.175725494060432 |
| C  | -2.489157653067590 | -2.358633916819983 | -0.308152272064584 |
| C  | 0.586994640752916  | -4.299421398502922 | -0.079546740569220 |
| C  | 1.038005627657298  | -2.934374816948374 | 0.115043245992908  |
| C  | -0.481868882158963 | 4.279844357654440  | -0.144825064672022 |
| C  | 2.377817142595584  | -2.546001338769734 | 0.371121987633980  |
| C  | -4.193636259461437 | 0.810783037043648  | 0.280353080171952  |
| C  | -0.963889125777225 | 2.916016020214892  | -0.056938018674330 |
| C  | -2.809886796069993 | 1.209024040723232  | 0.149147967402148  |
| C  | -4.238055872536528 | -0.571663487647950 | 0.156042130894486  |
| C  | -2.880422356061096 | -1.016896568080501 | -0.054202055219402 |
| C  | -2.326952440611649 | 2.543322027680344  | 0.057630404694054  |
| C  | 4.306554752437666  | 0.551916659096790  | 0.155295786443274  |
| C  | 2.955602391101796  | 0.972917289258894  | -0.167474761500098 |
| C  | 4.243924474008132  | -0.800077395603441 | 0.464945665245950  |
| C  | 2.868108697315610  | -1.217226058258412 | 0.296874528591322  |
| N  | 0.119358638034594  | 2.040063144686358  | -0.149462372505166 |
| N  | -0.046858723682696 | -2.067226679604545 | 0.041460234683664  |
| N  | -2.017144500228888 | 0.074317792094646  | 0.004170475607268  |
| N  | 2.093268081969284  | -0.113308086409916 | -0.054037829395966 |
| N  | 5.364250559893494  | -1.628462025649281 | 0.841021693534038  |
| N  | -5.325630364585315 | 1.675084288756622  | 0.469911234599746  |
| N  | -5.410989131386007 | -1.354656520199843 | 0.223090888156930  |
| N  | -1.222208114958075 | 5.471700815020264  | -0.039189362301416 |
| N  | 1.763955129131278  | 5.339252812300634  | -0.576400376770294 |
| N  | 5.471300641660468  | 1.330039959146584  | 0.169494700810952  |
| N  | -1.637637420818191 | -5.387987180252711 | -0.378785861610996 |
| N  | 1.349601167296548  | -5.491971764517720 | -0.110723388345222 |
| N  | -3.284073751966979 | 3.595810039051824  | 0.059197779980108  |
| N  | 3.631974490775096  | 3.213901534723234  | -0.766932465975906 |
| N  | -3.523993724976183 | -3.272900722032340 | -0.671171244025478 |
| N  | 3.301781693099002  | -3.599777579063460 | 0.640389346992752  |
| H  | -2.452582022223918 | -5.342499900791683 | 0.240344432432196  |
| H  | -1.127542375015242 | -6.242421223217477 | -0.138369876231066 |
| H  | -3.157868650507424 | -4.080722339919570 | -1.179590148535617 |
| H  | -4.240165566960846 | -2.822112425137874 | -1.242862409643990 |
| H  | -5.519421641291864 | 1.876029968107950  | 1.456564024371534  |
| H  | -6.173097322666049 | 1.287860185275768  | 0.048674443691944  |
| H  | -2.029266779938315 | 5.384825972030382  | 0.581779895978556  |
| H  | 1.331452018217964  | 6.054905704900015  | -1.166842164891126 |
| H  | 2.038810946754886  | 5.785013440567178  | 0.306116275186798  |
| H  | 3.269534444517024  | 4.154360706690856  | -0.969556371389958 |
| H  | 4.210244256237152  | 2.877246243517054  | -1.539311761437922 |
| H  | 5.273540960642146  | 2.332049101908926  | 0.238954072580108  |
| H  | 6.154265646882681  | 1.018041761552424  | 0.861331862214708  |
| H  | 6.181224808809800  | -1.431710979319611 | 0.254312553750876  |
| H  | 5.645704739818964  | -1.479156672798009 | 1.816448867025444  |
| H  | 4.254256644103868  | -3.232516699063108 | 0.763431439292428  |
| H  | 3.030161727872624  | -4.150093018768166 | 1.458609186189632  |
| H  | 2.347751247144134  | -5.277835499309360 | -0.200349501020305 |
| H  | 1.064383899591014  | -6.105736152960473 | -0.877806276637676 |
| H  | -5.234377224985955 | -2.312300650541069 | 0.532244807711404  |
| H  | -6.125571546717390 | -0.924669764513666 | 0.814299683007940  |
| H  | -4.243236543071793 | 3.229578100610964  | 0.017803393055162  |
| H  | -3.125283535911013 | 4.262879832880526  | -0.698551913628094 |
| H  | -0.637481756657358 | 6.265317732586400  | 0.230234276862594  |

Transition Metal: Cr; Functional Group: NH2; Adsorbate: O

|    |                    |                    |                    |
|----|--------------------|--------------------|--------------------|
| Cr | 0.025712443120614  | -0.006045990565904 | 0.490731579943124  |
| C  | 0.883493700566128  | 4.137727206650056  | -0.472723610711139 |
| C  | 1.233227227925544  | 2.739821376906730  | -0.427863433066268 |
| C  | 2.548140849310974  | 2.225559986554106  | -0.560446320220969 |
| C  | -0.776161700850796 | -4.184304466041038 | -0.376101866618963 |
| C  | -1.160657546163442 | -2.796570604132064 | -0.291052699269237 |
| C  | -2.466135703007442 | -2.301918455946641 | -0.461430062310313 |
| C  | 0.584592164851598  | -4.245359145081595 | -0.120829502305313 |
| C  | 1.011836718811236  | -2.896340573905341 | 0.176374624556202  |
| C  | -0.455167837782863 | 4.231602288089816  | -0.120298949381137 |
| C  | 2.326576981199014  | -2.533633427838286 | 0.548357314390330  |
| C  | -4.168325162664402 | 0.804978945351352  | 0.359159659304608  |
| C  | -0.944101947343267 | 2.880423943116640  | 0.036234499149438  |
| C  | -2.784929579875545 | 1.203992926752468  | 0.259662338267456  |
| C  | -4.215211610794825 | -0.562950583239555 | 0.125563141424150  |
| C  | -2.858247633343190 | -0.988419597143164 | -0.107200279699143 |
| C  | -2.305002660380289 | 2.536796725617924  | 0.217611107676054  |
| C  | 4.265918593353287  | 0.520163857434466  | 0.176967110395928  |
| C  | 2.916426649719116  | 0.921953029401732  | -0.171384740130922 |
| C  | 4.190078171253800  | -0.799468384435293 | 0.600612922484042  |
| C  | 2.815097935071672  | -1.213289341725886 | 0.449931665375556  |
| N  | 0.114162531045502  | 1.979199046597328  | -0.103082764582080 |
| N  | -0.054740218257898 | -2.011731585370999 | 0.051111433688390  |
| N  | -1.985688842707766 | 0.084853029025484  | 0.044870435296214  |
| N  | 2.037538056658548  | -0.137045406630378 | 0.029315273179362  |
| N  | 5.290781161890362  | -1.613630140346160 | 1.052444076002706  |
| N  | -5.293126794060157 | 1.660211235114160  | 0.610583848620816  |
| N  | -5.385551331312854 | -1.353629780282578 | 0.123244203873142  |
| N  | -1.171751334338776 | 5.437748325374344  | 0.015362009557416  |
| N  | 1.763411108362950  | 5.237962850091035  | -0.775016307546576 |
| N  | 5.435116569662636  | 1.288638355494464  | 0.120639589546498  |
| N  | -1.594199397911527 | -5.309289691794612 | -0.676313891569272 |
| N  | 1.348249729530056  | -5.435643699309107 | -0.149739425425640 |
| N  | -3.245595408925091 | 3.589386208450498  | 0.299154058066514  |
| N  | 3.590525624126910  | 3.095684333777172  | -0.979265915516777 |
| N  | -3.474642722229973 | -3.182716669552185 | -0.946726301059140 |
| N  | 3.215505270952100  | -3.586787698918460 | 0.898234104952460  |
| H  | -2.487839065034457 | -5.274255132538407 | -0.178409741524812 |
| H  | -1.119638443345732 | -6.171635360867304 | -0.394766591083531 |
| H  | -3.090632079344076 | -3.914053329371228 | -1.547795310432750 |
| H  | -4.207162584454968 | -2.682941443735402 | -1.452722300303495 |
| H  | -5.471286880440136 | 1.806618831213832  | 1.609528566383806  |
| H  | -6.148713054761535 | 1.305749525371052  | 0.177774902861826  |
| H  | -1.860241364545029 | 5.406631429652061  | 0.770259893114860  |
| H  | 1.297254059533334  | 5.948913233698148  | -1.344199536649210 |
| H  | 2.129459071154932  | 5.696653428512331  | 0.066587704473516  |
| H  | 3.229434929795236  | 4.019056872191434  | -1.247955784584626 |
| H  | 4.161674787950016  | 2.688018845419724  | -1.721137819077860 |
| H  | 5.247249675735546  | 2.294509377202916  | 0.105795932731248  |
| H  | 6.118196416003076  | 1.031179534548412  | 0.834348513487756  |
| H  | 6.121146531984274  | -1.472864294460425 | 0.468741387249376  |
| H  | 5.555018892388030  | -1.399955303481320 | 2.020507742307166  |
| H  | 4.161726228939984  | -3.229913900979547 | 1.080277296994412  |
| H  | 2.875727626314562  | -4.136755251718906 | 1.689768455678990  |
| H  | 2.349988398849346  | -5.223750411909094 | -0.102948492215177 |
| H  | 1.153626402327238  | -5.991034255329286 | -0.986625420114969 |
| H  | -5.211152662517609 | -2.324876226983978 | 0.387642975790848  |
| H  | -6.110749394901339 | -0.960680010047575 | 0.726894270666944  |
| H  | -4.210695605040261 | 3.242363028586558  | 0.245799809738806  |
| H  | -3.078758021054536 | 4.325202720903624  | -0.389250781199653 |
| H  | -0.545704796885410 | 6.235332668646754  | 0.145866309205472  |
| O  | 0.025175016767830  | 0.066192909084600  | 2.092218731673142  |

Transition Metal: Cr; Functional Group: NH2; Adsorbate: OH

|    |                    |                     |                    |
|----|--------------------|---------------------|--------------------|
| Cr | 0.021603066622718  | -0.012555336394694  | 0.294071909970422  |
| C  | 0.883486870001044  | 4.172564797770740   | -0.422069139802147 |
| C  | 1.243535906439576  | 2.774205049104374   | -0.375613259590331 |
| C  | 2.561072969627222  | 2.251360990729644   | -0.494538066617423 |
| C  | -0.804594012421894 | -4.218883766066881  | -0.321493598210008 |
| C  | -1.186014117804149 | -2.826250528570434  | -0.268141075162173 |
| C  | -2.485310223370185 | -2.314464283586496  | -0.467440860925279 |
| C  | 0.554710340275678  | -4.281621627731965  | -0.058434618474806 |
| C  | 0.991868775170266  | -2.924639447664529  | 0.207070160982394  |
| C  | -0.460632270490176 | 4.259111934184120   | -0.084513899041930 |
| C  | 2.316644507442598  | -2.545378948934875  | 0.541553115171710  |
| C  | -4.195765164945154 | 0.815745129753850   | 0.293127636989670  |
| C  | -0.948629240450082 | 2.906037578509170   | 0.072331731777368  |
| C  | -2.806265650879162 | 1.210817247272762   | 0.230548008474140  |
| C  | -4.245235508887284 | -0.549279820739915  | 0.041083435842858  |
| C  | -2.883575878048248 | -0.985302571862189  | -0.160764010912981 |
| C  | -2.313096219205455 | 2.544715023888550   | 0.236956948328558  |
| C  | 4.283496909217140  | 0.507560401006156   | 0.171352674602508  |
| C  | 2.933632375033724  | 0.929163965072666   | -0.157566635977425 |
| C  | 4.204501675671867  | -0.823268019371177  | 0.560993302168456  |
| C  | 2.823845649416580  | -1.228878548921255  | 0.420127445021808  |
| N  | 0.118356620585360  | 2.018063888864314   | -0.067206347913707 |
| N  | -0.076183309727135 | -2.050073497358635  | 0.065342113594024  |
| N  | -2.018960139129174 | 0.088155499314208   | 0.006551847826224  |
| N  | 2.060314161335748  | -0.139199958747760  | 0.012989759547542  |
| N  | 5.310535990981430  | -1.651413576490842  | 0.976584213326764  |
| N  | -5.324201352284064 | 1.672276518638502   | 0.529737408533056  |
| N  | -5.422027893528297 | -1.328038679613908  | -0.004661547774144 |
| N  | -1.192760327090053 | 5.461910608946228   | 0.018502370853822  |
| N  | 1.762103356156346  | 5.279110179736626   | -0.713538057743509 |
| N  | 5.458139585874497  | 1.267599441344064   | 0.118940262254636  |
| N  | -1.635629910256423 | -5.339856578945168  | -0.616824469098951 |
| N  | 1.316364760533746  | -5.474227972015875  | -0.060730063979207 |
| N  | -3.253452325152253 | 3.591120680371190   | 0.358989505168586  |
| N  | 3.612716452154734  | 3.136522056324394   | -0.861015173199561 |
| N  | -3.495692486380797 | -3.1996026245250600 | -0.938962677749618 |
| N  | 3.207973609388540  | -3.597249671062482  | 0.895020021412494  |
| H  | -2.494212650661680 | -5.327929840087384  | -0.057820016898446 |
| H  | -1.144596688822645 | -6.208759646947598  | -0.389605564061178 |
| H  | -3.107321314205915 | -3.987353360322722  | -1.461302014575313 |
| H  | -4.188054539056989 | -2.718525658928719  | -1.514449084120059 |
| H  | -5.535337659156641 | 1.788036040537340   | 1.526428353506470  |
| H  | -6.166728909350239 | 1.336005247777308   | 0.057952980732466  |
| H  | -1.822498943015006 | 5.475488989387842   | 0.823962698962012  |
| H  | 1.353160024199642  | 5.920156830709928   | -1.399007784708566 |
| H  | 2.002422939768142  | 5.823232471846346   | 0.122320826022508  |
| H  | 3.255656682089738  | 4.074876176204298   | -1.081188737144437 |
| H  | 4.180082040706806  | 2.767291402507562   | -1.626128754895650 |
| H  | 5.279934843363142  | 2.274626169029438   | 0.153941620029714  |
| H  | 6.159544069040912  | 0.970603318046274   | 0.798469578777372  |
| H  | 6.118104311133514  | -1.533406434232141  | 0.356549603870040  |
| H  | 5.619434957006230  | -1.429547564473598  | 1.929427426559528  |
| H  | 4.160668666795508  | -3.242610700117957  | 1.047404980011620  |
| H  | 2.883086072182904  | -4.121264885028639  | 1.710274481999864  |
| H  | 2.318291368440130  | -5.259941823133907  | -0.025859013108512 |
| H  | 1.120553840674930  | -6.051159027665163  | -0.882747420071667 |
| H  | -5.262514122963546 | -2.303533162613537  | 0.254531738509910  |
| H  | -6.162228707557066 | -0.933415149545784  | 0.579681145917244  |
| H  | -4.218851326345481 | 3.251921695540752   | 0.267267444394612  |
| H  | -3.068490596220602 | 4.371529492166638   | -0.273333814297271 |
| H  | -0.573327523634447 | 6.274713014962511   | 0.052751915009250  |
| H  | 0.494923813366604  | 0.892814862449234   | 2.457857103763960  |
| O  | 0.021679941223420  | 0.090547959610684   | 2.167766327770656  |



Transition Metal: Cr; Functional Group: NH2; Adsorbate: OOH

|    |                    |                    |                    |
|----|--------------------|--------------------|--------------------|
| Cr | 0.026949969205344  | -0.018345178268998 | 0.308677501090414  |
| C  | 0.884895831430952  | 4.171034505035274  | -0.428925485982965 |
| C  | 1.241216326221920  | 2.770862593865884  | -0.380392404510783 |
| C  | 2.557710478786984  | 2.246589970895254  | -0.501933650962030 |
| C  | -0.807906083180875 | -4.219245781544988 | -0.321870944519468 |
| C  | -1.186905266659355 | -2.825812772124056 | -0.264773968579995 |
| C  | -2.482845526432641 | -2.309777886927812 | -0.469500069101695 |
| C  | 0.550379988027936  | -4.284892592336913 | -0.056748626642900 |
| C  | 0.988943481435444  | -2.928457615619948 | 0.213588392011918  |
| C  | -0.456394693766267 | 4.261463432439180  | -0.084784938586754 |
| C  | 2.314472898956134  | -2.550013639210672 | 0.543383643100104  |
| C  | -4.191169465728770 | 0.818560275806012  | 0.303039402152232  |
| C  | -0.946226672595095 | 2.908568185364130  | 0.075275018336724  |
| C  | -2.803288911472986 | 1.215951132831312  | 0.240863626828864  |
| C  | -4.239238619689473 | -0.546779360427042 | 0.045245754009382  |
| C  | -2.878747457409631 | -0.981069994908342 | -0.157522142438879 |
| C  | -2.310065909370479 | 2.550568433491632  | 0.249219464846790  |
| C  | 4.279197573229368  | 0.505648806200182  | 0.170577811537238  |
| C  | 2.931221782459658  | 0.923450785631966  | -0.167542734554250 |
| C  | 4.200664136147142  | -0.826596777605477 | 0.558365928217424  |
| C  | 2.823115646676260  | -1.234197501187754 | 0.411043088078104  |
| N  | 0.116778134016022  | 2.018413148424144  | -0.068012946268581 |
| N  | -0.077894008845291 | -2.052828193827796 | 0.075368249379532  |
| N  | -2.013460903096021 | 0.093047087902434  | 0.014246752024014  |
| N  | 2.060376367774080  | -0.147383842628301 | -0.004832836333852 |
| N  | 5.302979554751440  | -1.651940278039479 | 0.987629940413016  |
| N  | -5.324440793709170 | 1.672084462323470  | 0.531083269211280  |
| N  | -5.416368561245918 | -1.322597065381288 | -0.006130068750132 |
| N  | -1.187227447195486 | 5.465348221101132  | 0.020455123226706  |
| N  | 1.763949973524480  | 5.274952986522400  | -0.729186555960453 |
| N  | 5.451520978007470  | 1.269666910125892  | 0.133388401462080  |
| N  | -1.642577096746546 | -5.336359135257460 | -0.622096119848411 |
| N  | 1.311210666140416  | -5.477923072750317 | -0.063548357002865 |
| N  | -3.250397632800329 | 3.596460755907830  | 0.381454576014020  |
| N  | 3.609158246630654  | 3.131099663053532  | -0.866022379978489 |
| N  | -3.494086955810836 | -3.187434835158712 | -0.955002413860203 |
| N  | 3.203111406875554  | -3.599929760926933 | 0.904952032323072  |
| H  | -2.498715697978618 | -5.326357223144436 | -0.059408560071898 |
| H  | -1.152483651566506 | -6.207188274537419 | -0.400844183422869 |
| H  | -3.102713137147106 | -3.980815364591706 | -1.466993915536165 |
| H  | -4.167725898230279 | -2.701254571789477 | -1.548563731642382 |
| H  | -5.562186833625798 | 1.766738512645322  | 1.524115191865250  |
| H  | -6.154246043114910 | 1.342585182141494  | 0.031928872325632  |
| H  | -1.806203761191515 | 5.483621834451368  | 0.834166564799816  |
| H  | 1.349099624629150  | 5.918357711029922  | -1.408764966988937 |
| H  | 2.015758261660822  | 5.816181801462562  | 0.105153811970180  |
| H  | 3.254387644069498  | 4.069504892063252  | -1.089670111837727 |
| H  | 4.184965579519576  | 2.760847211222946  | -1.624166351987164 |
| H  | 5.267971438777880  | 2.276004077583096  | 0.167290318778174  |
| H  | 6.143155284323733  | 0.975898832847174  | 0.824513072267646  |
| H  | 6.116081706556490  | -1.535990092870325 | 0.374599622234266  |
| H  | 5.603198894007861  | -1.424555938035517 | 1.942092411454340  |
| H  | 4.155668428581888  | -3.245516441427721 | 1.059763022039072  |
| H  | 2.873310366144150  | -4.120989760445394 | 1.720083828795114  |
| H  | 2.313075142161066  | -5.265510925492142 | -0.019196453665412 |
| H  | 1.121740167124596  | -6.046282792732882 | -0.892928822763022 |
| H  | -5.255863655809392 | -2.306310106482659 | 0.219398536311436  |
| H  | -6.151779948793287 | -0.943429729760680 | 0.594005587066752  |
| H  | -4.215419178978312 | 3.256627121416614  | 0.290336952424744  |
| H  | -3.068756926570025 | 4.379368209343922  | -0.248662559868823 |
| H  | -0.566319541140953 | 6.277401060326771  | 0.044481280491490  |
| H  | -1.290539971089807 | 0.579081307902448  | 3.128821360305238  |
| O  | 0.294764449624560  | 0.092284763567744  | 2.177338080084254  |
| O  | -0.885246294038396 | -0.299701015620574 | 2.969505161018084  |

Transition Metal: Cr; Functional Group: OH; Adsorbate: Clean

|    |                    |                    |                   |
|----|--------------------|--------------------|-------------------|
| Cr | 10.996029999999999 | 11.014040000000000 | 7.851800000000000 |
| C  | 10.329029999999999 | 15.270440000000001 | 7.759270000000000 |
| C  | 9.908939999999999  | 13.899459999999999 | 7.756230000000000 |
| C  | 8.572530000000000  | 13.458170000000001 | 7.702000000000000 |
| C  | 11.660980000000000 | 6.758600000000000  | 7.738040000000000 |
| C  | 12.083080000000001 | 8.128399999999999  | 7.777640000000000 |
| C  | 13.421400000000000 | 8.566970000000000  | 7.792010000000000 |
| C  | 10.283950000000001 | 6.728660000000000  | 7.837990000000000 |
| C  | 9.849090000000000  | 8.106550000000000  | 7.889970000000000 |
| C  | 11.708399999999999 | 15.298410000000001 | 7.817030000000000 |
| C  | 8.509650000000001  | 8.555099999999999  | 7.947850000000000 |
| C  | 15.257410000000000 | 11.671090000000000 | 7.997520000000000 |
| C  | 12.142080000000000 | 13.920760000000000 | 7.876950000000000 |
| C  | 13.890900000000000 | 12.122059999999999 | 7.951000000000000 |
| C  | 15.252520000000001 | 10.295410000000000 | 7.933570000000000 |
| C  | 13.868650000000001 | 9.895630000000001  | 7.857600000000000 |
| C  | 13.480710000000000 | 13.473070000000000 | 7.959010000000000 |
| C  | 6.738090000000000  | 11.729240000000001 | 7.799120000000000 |
| C  | 8.123670000000001  | 12.129820000000000 | 7.770560000000000 |
| C  | 6.732160000000000  | 10.355869999999999 | 7.904760000000000 |
| C  | 8.099800000000000  | 9.906129999999999  | 7.916930000000000 |
| N  | 11.027900000000001 | 13.079560000000001 | 7.832230000000000 |
| N  | 10.963889999999999 | 8.947760000000001  | 7.854490000000000 |
| N  | 13.044540000000000 | 11.016900000000000 | 7.870400000000000 |
| N  | 8.947369999999999  | 11.010800000000000 | 7.844260000000000 |
| O  | 9.483040000000001  | 16.394220000000001 | 7.655650000000000 |
| O  | 7.556240000000000  | 14.408510000000000 | 7.587910000000000 |
| O  | 12.506320000000001 | 5.629200000000000  | 7.693970000000000 |
| O  | 14.440120000000000 | 7.612180000000000  | 7.760410000000000 |
| O  | 9.487450000000001  | 5.615550000000000  | 7.868000000000000 |
| O  | 12.509160000000000 | 16.409710000000000 | 7.819440000000000 |
| O  | 7.561930000000000  | 7.561040000000000  | 8.013710000000000 |
| O  | 16.354700000000001 | 12.511889999999999 | 8.088070000000000 |
| O  | 16.387380000000000 | 9.524770000000000  | 7.950010000000000 |
| O  | 14.426570000000000 | 14.467639999999999 | 8.043480000000001 |
| O  | 5.602850000000000  | 12.498089999999999 | 7.748060000000000 |
| O  | 5.633380000000000  | 9.515480000000000  | 7.982160000000000 |
| H  | 9.460910000000000  | 16.851310000000002 | 8.519150000000000 |
| H  | 7.969360000000000  | 15.299670000000001 | 7.525640000000000 |
| H  | 12.491580000000001 | 5.263440000000000  | 6.787830000000000 |
| H  | 14.029949999999999 | 6.718740000000000  | 7.808350000000000 |
| H  | 10.075820000000000 | 4.841890000000000  | 7.971790000000000 |
| H  | 11.950160000000000 | 17.171800000000001 | 7.570690000000000 |
| H  | 6.669150000000000  | 7.964890000000000  | 8.017760000000001 |
| H  | 17.165710000000001 | 11.970050000000001 | 8.090830000000000 |
| H  | 16.094120000000000 | 8.589850000000000  | 7.901250000000000 |
| H  | 15.318910000000001 | 14.063990000000000 | 8.075329999999999 |
| H  | 5.896580000000000  | 13.430050000000000 | 7.661330000000000 |
| H  | 4.821840000000000  | 10.052080000000000 | 7.912790000000000 |

Transition Metal: Cr; Functional Group: OH; Adsorbate: O

|    |                    |                    |                   |
|----|--------------------|--------------------|-------------------|
| Cr | 10.994330000000000 | 11.014720000000001 | 7.694430000000000 |
| C  | 10.328960000000000 | 15.230350000000000 | 6.961640000000000 |
| C  | 9.919219999999999  | 13.858510000000001 | 6.991580000000000 |
| C  | 8.593760000000000  | 13.416309999999999 | 6.866860000000000 |
| C  | 11.657190000000000 | 6.799770000000000  | 6.928370000000000 |
| C  | 12.073689999999999 | 8.169200000000000  | 6.994060000000000 |
| C  | 13.406160000000000 | 8.603350000000001  | 6.935620000000000 |
| C  | 10.301679999999999 | 6.755190000000000  | 7.181050000000000 |
| C  | 9.877359999999999  | 8.128060000000000  | 7.328440000000000 |
| C  | 11.695340000000000 | 15.271170000000000 | 7.149110000000000 |
| C  | 8.545590000000001  | 8.560650000000001  | 7.476860000000000 |
| C  | 15.216830000000000 | 11.681570000000001 | 7.375040000000000 |
| C  | 12.118850000000000 | 13.899430000000001 | 7.303660000000000 |
| C  | 13.849869999999999 | 12.122420000000000 | 7.380880000000000 |
| C  | 15.218579999999999 | 10.320860000000000 | 7.167080000000000 |
| C  | 13.836220000000001 | 9.925640000000000  | 7.081800000000000 |
| C  | 13.448440000000000 | 13.467570000000000 | 7.473300000000000 |
| C  | 6.779530000000000  | 11.694500000000000 | 7.044770000000000 |
| C  | 8.162850000000001  | 12.093750000000000 | 7.009510000000000 |
| C  | 6.776700000000000  | 10.339680000000000 | 7.289870000000000 |
| C  | 8.143660000000001  | 9.903910000000000  | 7.356520000000000 |
| N  | 11.022760000000000 | 13.041560000000000 | 7.200780000000000 |
| N  | 10.973080000000000 | 8.986260000000000  | 7.217800000000000 |
| N  | 12.996160000000000 | 11.030820000000000 | 7.207730000000000 |
| N  | 8.999870000000000  | 10.994470000000000 | 7.191640000000000 |
| O  | 10.984330000000000 | 11.022040000000001 | 9.292380000000000 |
| O  | 9.487690000000001  | 16.335270000000001 | 6.718140000000000 |
| O  | 7.585670000000000  | 14.344640000000000 | 6.622530000000000 |
| O  | 12.496940000000000 | 5.683260000000000  | 6.730530000000000 |
| O  | 14.421889999999999 | 7.664240000000000  | 6.768990000000000 |
| O  | 9.507870000000000  | 5.642940000000000  | 7.243400000000000 |
| O  | 12.497130000000000 | 16.381480000000000 | 7.162940000000000 |
| O  | 7.613560000000000  | 7.574930000000000  | 7.675310000000000 |
| O  | 16.307860000000002 | 12.518520000000001 | 7.528950000000000 |
| O  | 16.356670000000001 | 9.561950000000000  | 7.079720000000000 |
| O  | 14.376410000000000 | 14.454459999999999 | 7.684590000000000 |
| O  | 5.643200000000000  | 12.446610000000000 | 6.895460000000000 |
| O  | 5.683170000000000  | 9.502500000000000  | 7.427780000000000 |
| H  | 9.416890000000000  | 16.861170000000001 | 7.538730000000000 |
| H  | 7.995510000000000  | 15.237349999999999 | 6.550660000000000 |
| H  | 12.401300000000001 | 5.380180000000000  | 5.806310000000000 |
| H  | 14.020040000000000 | 6.765340000000000  | 6.792150000000000 |
| H  | 10.098580000000000 | 4.864450000000000  | 7.222810000000000 |
| H  | 11.974010000000000 | 17.124580000000002 | 6.803500000000000 |
| H  | 6.717040000000000  | 7.971200000000000  | 7.675660000000000 |
| H  | 17.123729999999998 | 11.988160000000001 | 7.462810000000000 |
| H  | 16.069320000000001 | 8.632560000000000  | 6.951140000000000 |
| H  | 15.272259999999999 | 14.057580000000000 | 7.709520000000000 |
| H  | 5.931480000000000  | 13.370670000000000 | 6.736490000000000 |
| H  | 4.869000000000000  | 10.024500000000000 | 7.301060000000000 |

Transition Metal: Cr; Functional Group: OH; Adsorbate: OH

|    |                    |                    |                   |
|----|--------------------|--------------------|-------------------|
| Cr | 10.991370000000000 | 11.010970000000000 | 7.376960000000000 |
| C  | 10.322229999999999 | 15.248650000000000 | 6.919980000000000 |
| C  | 9.907159999999999  | 13.876749999999999 | 6.923430000000000 |
| C  | 8.575089999999999  | 13.433009999999999 | 6.826440000000000 |
| C  | 11.655989999999999 | 6.774160000000000  | 6.866660000000000 |
| C  | 12.079480000000000 | 8.142049999999999  | 6.932770000000000 |
| C  | 13.416660000000000 | 8.579359999999999  | 6.904790000000000 |
| C  | 10.287900000000000 | 6.737280000000000  | 7.052560000000000 |
| C  | 9.857699999999999  | 8.111070000000000  | 7.174240000000000 |
| C  | 11.695530000000000 | 15.282500000000001 | 7.058390000000000 |
| C  | 8.520540000000000  | 8.554860000000000  | 7.281320000000000 |
| C  | 15.243460000000001 | 11.673909999999999 | 7.231630000000000 |
| C  | 12.125109999999999 | 13.906950000000000 | 7.164820000000000 |
| C  | 13.874169999999999 | 12.117490000000000 | 7.226230000000000 |
| C  | 15.244870000000001 | 10.305890000000000 | 7.078430000000000 |
| C  | 13.860790000000000 | 9.905250000000001  | 7.004130000000000 |
| C  | 13.459960000000001 | 13.463930000000000 | 7.298800000000000 |
| C  | 6.744160000000000  | 11.705380000000000 | 6.944930000000000 |
| C  | 8.130300000000000  | 12.106629999999999 | 6.920260000000000 |
| C  | 6.739870000000000  | 10.341570000000001 | 7.131370000000000 |
| C  | 8.108720000000000  | 9.900150000000000  | 7.184300000000000 |
| N  | 11.020390000000001 | 13.062020000000000 | 7.070550000000000 |
| N  | 10.966460000000000 | 8.957440000000000  | 7.099540000000000 |
| N  | 13.031370000000001 | 11.018300000000000 | 7.083640000000000 |
| N  | 8.955719999999999  | 10.997080000000000 | 7.052860000000000 |
| O  | 10.978690000000000 | 11.048010000000000 | 9.242640000000000 |
| O  | 9.478529999999999  | 16.363610000000001 | 6.739540000000000 |
| O  | 7.564880000000000  | 14.375170000000001 | 6.647420000000000 |
| O  | 12.496040000000001 | 5.650600000000000  | 6.716950000000000 |
| O  | 14.432000000000000 | 7.629540000000000  | 6.799220000000000 |
| O  | 9.490500000000001  | 5.625600000000000  | 7.079880000000000 |
| O  | 12.497080000000000 | 16.392749999999999 | 7.074190000000000 |
| O  | 7.583350000000000  | 7.564230000000000  | 7.435870000000000 |
| O  | 16.335000000000001 | 12.518260000000000 | 7.345190000000000 |
| O  | 16.383099999999999 | 9.543080000000000  | 7.013640000000000 |
| O  | 14.393420000000001 | 14.454710000000000 | 7.469470000000000 |
| O  | 5.609350000000000  | 12.464740000000001 | 6.819000000000000 |
| O  | 5.646020000000000  | 9.497669999999999  | 7.225850000000000 |
| H  | 11.232570000000001 | 10.182160000000000 | 9.614179999999999 |
| H  | 9.422790000000001  | 16.852860000000000 | 7.583730000000000 |
| H  | 7.978180000000000  | 15.266920000000001 | 6.585270000000000 |
| H  | 12.436680000000001 | 5.335240000000000  | 5.793740000000000 |
| H  | 14.024080000000000 | 6.733900000000000  | 6.821350000000000 |
| H  | 10.080740000000000 | 4.846770000000000  | 7.097730000000000 |
| H  | 11.958159999999999 | 17.146360000000001 | 6.763340000000000 |
| H  | 6.687380000000000  | 7.961690000000000  | 7.425400000000000 |
| H  | 17.150710000000000 | 11.984760000000000 | 7.310400000000000 |
| H  | 16.095210000000002 | 8.609620000000000  | 6.927760000000000 |
| H  | 15.289000000000000 | 14.056929999999999 | 7.492030000000000 |
| H  | 5.900240000000000  | 13.394520000000000 | 6.706060000000000 |
| H  | 4.831830000000000  | 10.025210000000000 | 7.126260000000000 |

Transition Metal: Cr; Functional Group: OH; Adsorbate: OOH

|    |                    |                    |                   |
|----|--------------------|--------------------|-------------------|
| Cr | 10.984140000000000 | 11.034230000000001 | 6.847700000000000 |
| C  | 10.326490000000000 | 15.283289999999999 | 6.392320000000000 |
| C  | 9.906940000000001  | 13.912950000000000 | 6.422170000000000 |
| C  | 8.570380000000000  | 13.477440000000000 | 6.370100000000000 |
| C  | 11.648450000000000 | 6.791720000000000  | 6.391810000000000 |
| C  | 12.069440000000000 | 8.160690000000001  | 6.452500000000000 |
| C  | 13.407920000000001 | 8.593340000000000  | 6.465560000000000 |
| C  | 10.272760000000000 | 6.760500000000000  | 6.499360000000000 |
| C  | 9.841519999999999  | 8.137639999999999  | 6.578880000000000 |
| C  | 11.704940000000001 | 15.311260000000001 | 6.454700000000000 |
| C  | 8.502670000000000  | 8.580900000000000  | 6.646580000000000 |
| C  | 15.245200000000001 | 11.692720000000000 | 6.635990000000000 |
| C  | 12.133889999999999 | 13.934369999999999 | 6.552130000000000 |
| C  | 13.877940000000001 | 12.140660000000000 | 6.621090000000000 |
| C  | 15.239730000000000 | 10.318099999999999 | 6.564940000000000 |
| C  | 13.853990000000000 | 9.921090000000000  | 6.519180000000000 |
| C  | 13.471340000000000 | 13.490850000000000 | 6.647930000000000 |
| C  | 6.737130000000000  | 11.750629999999999 | 6.423440000000000 |
| C  | 8.122310000000001  | 12.150690000000001 | 6.437080000000000 |
| C  | 6.729030000000000  | 10.377929999999999 | 6.535500000000000 |
| C  | 8.095300000000000  | 9.930690000000000  | 6.595760000000000 |
| H  | 9.457470000000001  | 16.893490000000000 | 7.084810000000000 |
| H  | 7.975510000000000  | 15.315560000000000 | 6.153510000000000 |
| H  | 12.470179999999999 | 5.323950000000000  | 5.391870000000000 |
| H  | 14.010630000000001 | 6.744540000000000  | 6.456790000000000 |
| H  | 10.059710000000001 | 4.872000000000000  | 6.576160000000000 |
| H  | 11.954060000000000 | 17.174070000000000 | 6.143720000000000 |
| H  | 6.663120000000000  | 7.990820000000000  | 6.711410000000000 |
| H  | 17.154480000000000 | 11.997880000000000 | 6.681250000000000 |
| H  | 16.084430000000001 | 8.613709999999999  | 6.505250000000000 |
| H  | 15.306920000000000 | 14.081390000000001 | 6.773270000000000 |
| H  | 5.896500000000000  | 13.448490000000000 | 6.241540000000000 |
| H  | 4.822040000000000  | 10.066979999999999 | 6.441730000000000 |
| H  | 9.448330000000000  | 10.718650000000000 | 9.625400000000001 |
| O  | 9.481009999999999  | 16.402030000000000 | 6.240480000000000 |
| O  | 7.558490000000000  | 14.427890000000000 | 6.244660000000000 |
| O  | 12.493880000000001 | 5.665560000000000  | 6.307370000000000 |
| O  | 14.422409999999999 | 7.638750000000000  | 6.432230000000000 |
| O  | 9.473260000000000  | 5.650500000000000  | 6.503620000000000 |
| O  | 12.509779999999999 | 16.417829999999999 | 6.416830000000000 |
| O  | 7.557050000000000  | 7.589160000000000  | 6.723020000000000 |
| O  | 16.341290000000001 | 12.536350000000001 | 6.690020000000000 |
| O  | 16.374990000000000 | 9.550039999999999  | 6.533950000000000 |
| O  | 14.413270000000001 | 14.483309999999999 | 6.747740000000000 |
| O  | 5.603470000000000  | 12.515480000000000 | 6.316720000000000 |
| O  | 5.630730000000000  | 9.535019999999999  | 6.562590000000000 |
| O  | 11.066760000000000 | 11.180339999999999 | 8.722110000000001 |
| O  | 10.245089999999999 | 10.184139999999999 | 9.421010000000001 |
| N  | 11.022830000000001 | 13.092380000000000 | 6.516560000000000 |
| N  | 10.952930000000000 | 8.980259999999999  | 6.546340000000000 |
| N  | 13.028940000000000 | 11.039840000000000 | 6.545760000000000 |
| N  | 8.945440000000000  | 11.032909999999999 | 6.539310000000000 |

Transition Metal: Cu; Functional Group: BH2; Adsorbate: Clean

|    |                    |                    |                   |
|----|--------------------|--------------------|-------------------|
| H  | 8.329639999999999  | 16.654370000000000 | 6.242960000000000 |
| H  | 10.004810000000000 | 17.667739999999998 | 6.911220000000000 |
| H  | 6.200960000000000  | 13.792190000000000 | 8.392609999999999 |
| H  | 6.774460000000000  | 15.421740000000000 | 7.386570000000000 |
| H  | 11.704150000000000 | 4.335090000000000  | 7.001080000000000 |
| H  | 13.372420000000000 | 5.312450000000000  | 6.270630000000000 |
| H  | 14.880220000000000 | 6.587400000000000  | 7.335200000000000 |
| H  | 15.612850000000000 | 8.225490000000001  | 6.415230000000000 |
| H  | 8.961990000000000  | 4.922550000000000  | 8.313390000000000 |
| H  | 8.721900000000000  | 5.109080000000000  | 6.272840000000000 |
| H  | 13.682600000000001 | 15.632989999999999 | 6.211610000000000 |
| H  | 12.927519999999999 | 17.324510000000000 | 7.042610000000000 |
| H  | 6.223890000000000  | 7.696740000000000  | 7.588740000000000 |
| H  | 7.665690000000000  | 6.261120000000000  | 7.591180000000000 |
| H  | 16.465730000000001 | 13.466710000000001 | 8.472730000000000 |
| H  | 17.490430000000000 | 11.903750000000000 | 7.586700000000000 |
| H  | 15.502290000000000 | 8.202520000000000  | 8.339180000000001 |
| H  | 17.169020000000000 | 8.976279999999999  | 7.478670000000000 |
| H  | 13.663230000000000 | 15.778530000000000 | 8.132999999999999 |
| H  | 15.286170000000000 | 14.999499999999999 | 7.228520000000000 |
| H  | 4.527030000000000  | 12.994300000000001 | 7.553690000000000 |
| H  | 6.064790000000000  | 13.773070000000001 | 6.470440000000000 |
| H  | 4.877460000000000  | 8.901800000000000  | 6.574340000000000 |
| H  | 4.972920000000000  | 8.971500000000001  | 8.636240000000001 |
| C  | 10.145830000000000 | 15.318780000000000 | 7.110870000000000 |
| C  | 9.670370000000000  | 13.917170000000000 | 7.213780000000000 |
| C  | 8.334619999999999  | 13.438090000000001 | 7.285710000000000 |
| C  | 11.588030000000000 | 6.679740000000000  | 7.170110000000000 |
| C  | 12.046900000000001 | 8.090220000000000  | 7.214360000000000 |
| C  | 13.355620000000000 | 8.589869999999999  | 7.258840000000000 |
| C  | 10.193360000000000 | 6.730970000000000  | 7.295620000000000 |
| C  | 9.843510000000000  | 8.141950000000000  | 7.345750000000000 |
| C  | 11.544029999999999 | 15.227290000000000 | 7.178880000000000 |
| C  | 8.485180000000000  | 8.543990000000001  | 7.428330000000000 |
| C  | 15.134069999999999 | 11.722360000000000 | 7.467680000000000 |
| C  | 11.877980000000001 | 13.832020000000000 | 7.270400000000000 |
| C  | 13.729360000000000 | 12.189170000000001 | 7.392950000000000 |
| C  | 15.052849999999999 | 10.327980000000000 | 7.384360000000000 |
| C  | 13.653090000000001 | 9.979889999999999  | 7.318120000000000 |
| C  | 13.253600000000000 | 13.511540000000000 | 7.327990000000000 |
| C  | 6.657750000000000  | 11.667840000000000 | 7.437690000000000 |
| C  | 8.053400000000000  | 12.068659999999999 | 7.349370000000000 |
| C  | 6.641120000000000  | 10.279260000000001 | 7.480080000000000 |
| C  | 8.063480000000000  | 9.892080000000000  | 7.416700000000000 |
| B  | 9.418559999999999  | 16.628019999999999 | 6.747030000000000 |
| B  | 6.943970000000000  | 14.239860000000000 | 7.368890000000000 |
| B  | 12.299410000000000 | 5.365990000000000  | 6.804920000000000 |
| B  | 14.730820000000000 | 7.770600000000000  | 7.323680000000000 |
| B  | 9.105940000000000  | 5.586760000000000  | 7.314020000000000 |
| B  | 12.832240000000001 | 16.135190000000001 | 7.129240000000000 |
| B  | 7.441110000000000  | 7.479950000000000  | 7.528100000000000 |
| B  | 16.444870000000002 | 12.440580000000001 | 7.849930000000000 |
| B  | 15.976810000000000 | 9.053330000000001  | 7.413580000000000 |
| B  | 14.098319999999999 | 14.874570000000000 | 7.239960000000000 |
| B  | 5.720110000000000  | 12.926470000000000 | 7.472450000000000 |
| B  | 5.487850000000000  | 9.212870000000001  | 7.569880000000000 |
| Cu | 10.868620000000000 | 11.015879999999999 | 7.314600000000000 |
| N  | 10.747710000000000 | 13.050789999999999 | 7.293570000000000 |
| N  | 10.945000000000000 | 8.944800000000001  | 7.296070000000000 |
| N  | 12.864649999999999 | 11.099270000000001 | 7.319030000000000 |
| N  | 8.891230000000000  | 10.969720000000001 | 7.340730000000000 |

Transition Metal: Cu; Functional Group: BH2; Adsorbate: O

|    |                    |                    |                   |
|----|--------------------|--------------------|-------------------|
| C  | 10.144180000000000 | 15.324870000000001 | 6.745290000000000 |
| C  | 9.666119999999999  | 13.923670000000000 | 6.844590000000000 |
| C  | 8.335010000000000  | 13.440939999999999 | 6.918410000000000 |
| C  | 11.588749999999999 | 6.673400000000000  | 6.812400000000000 |
| C  | 12.047140000000001 | 8.085410000000000  | 6.851740000000000 |
| C  | 13.353710000000000 | 8.589580000000000  | 6.897630000000000 |
| C  | 10.194780000000000 | 6.725360000000000  | 6.945460000000000 |
| C  | 9.845030000000000  | 8.138400000000001  | 6.991690000000000 |
| C  | 11.541420000000000 | 15.231619999999999 | 6.823000000000000 |
| C  | 8.486490000000000  | 8.544810000000000  | 7.078200000000000 |
| C  | 15.140820000000000 | 11.722670000000001 | 7.099040000000000 |
| C  | 11.875700000000000 | 13.833959999999999 | 6.914840000000000 |
| C  | 13.735590000000000 | 12.193130000000000 | 7.036600000000000 |
| C  | 15.055380000000000 | 10.328550000000000 | 7.012880000000000 |
| C  | 13.654080000000000 | 9.981460000000000  | 6.953960000000000 |
| C  | 13.254120000000000 | 13.513010000000000 | 6.979280000000000 |
| C  | 6.655860000000000  | 11.666779999999999 | 7.064550000000000 |
| C  | 8.052809999999999  | 12.067539999999999 | 6.976450000000000 |
| C  | 6.639440000000000  | 10.277369999999999 | 7.106350000000000 |
| C  | 8.060630000000000  | 9.889239999999999  | 7.047430000000000 |
| B  | 9.416350000000000  | 16.634380000000000 | 6.381340000000000 |
| B  | 6.943740000000000  | 14.241569999999999 | 7.005910000000000 |
| B  | 12.299700000000000 | 5.360600000000000  | 6.442830000000000 |
| B  | 14.730140000000000 | 7.769640000000000  | 6.961060000000000 |
| B  | 9.104730000000000  | 5.584810000000000  | 6.957470000000000 |
| B  | 12.829590000000000 | 16.138290000000001 | 6.782740000000000 |
| B  | 7.441380000000000  | 7.479880000000000  | 7.210920000000000 |
| B  | 16.459959999999999 | 12.436030000000001 | 7.465290000000000 |
| B  | 15.976470000000001 | 9.051819999999999  | 7.038260000000000 |
| B  | 14.096159999999999 | 14.879810000000001 | 6.903380000000000 |
| B  | 5.720680000000000  | 12.926209999999999 | 7.101510000000000 |
| B  | 5.483940000000000  | 9.212830000000000  | 7.180340000000000 |
| H  | 8.328580000000001  | 16.660080000000001 | 5.875100000000000 |
| H  | 10.001070000000000 | 17.673790000000000 | 6.550150000000000 |
| H  | 6.205780000000000  | 13.786149999999999 | 8.027390000000000 |
| H  | 6.774170000000000  | 15.422850000000000 | 7.026640000000000 |
| H  | 11.708530000000000 | 4.328960000000000  | 6.648080000000000 |
| H  | 13.367630000000000 | 5.308610000000000  | 5.898150000000000 |
| H  | 14.876650000000000 | 6.586210000000000  | 6.975220000000000 |
| H  | 15.603550000000000 | 8.220810000000000  | 6.044770000000000 |
| H  | 8.974940000000000  | 4.895750000000000  | 7.941360000000000 |
| H  | 8.692410000000001  | 5.141010000000000  | 5.912000000000000 |
| H  | 13.686360000000001 | 15.635360000000000 | 5.871840000000000 |
| H  | 12.926170000000001 | 17.327459999999999 | 6.697910000000000 |
| H  | 6.225740000000000  | 7.698810000000000  | 7.284410000000000 |
| H  | 7.672230000000000  | 6.264870000000000  | 7.302320000000000 |
| H  | 16.495830000000002 | 13.478050000000000 | 8.058940000000000 |
| H  | 17.496559999999999 | 11.876720000000001 | 7.215190000000000 |
| H  | 15.502520000000001 | 8.206239999999999  | 7.970990000000000 |
| H  | 17.168469999999999 | 8.972149999999999  | 7.096810000000000 |
| H  | 13.649120000000000 | 15.776710000000000 | 7.794880000000000 |
| H  | 15.282539999999999 | 15.008570000000001 | 6.901970000000000 |
| H  | 4.528020000000000  | 12.994850000000000 | 7.183640000000000 |
| H  | 6.069280000000000  | 13.776630000000001 | 6.103210000000000 |
| H  | 4.918360000000000  | 8.870870000000000  | 6.168810000000000 |
| H  | 4.925440000000000  | 9.002210000000000  | 8.230750000000000 |
| O  | 10.861090000000001 | 11.004350000000001 | 9.148740000000000 |
| N  | 10.746930000000001 | 13.059049999999999 | 6.913220000000000 |
| N  | 10.944240000000001 | 8.935670000000000  | 6.920610000000000 |
| N  | 12.872629999999999 | 11.101139999999999 | 6.953740000000000 |
| N  | 8.884690000000001  | 10.972270000000000 | 6.951970000000000 |
| Cu | 10.867680000000000 | 11.022819999999999 | 7.214910000000000 |

Transition Metal: Cu; Functional Group: BH2; Adsorbate: OH

|    |                    |                    |                   |
|----|--------------------|--------------------|-------------------|
| C  | 10.150340000000000 | 15.339330000000000 | 6.629410000000000 |
| C  | 9.670690000000000  | 13.940519999999999 | 6.757260000000000 |
| C  | 8.340130000000000  | 13.451060000000000 | 6.830760000000000 |
| C  | 11.592090000000001 | 6.668610000000000  | 6.681860000000000 |
| C  | 12.049329999999999 | 8.081640000000000  | 6.736130000000000 |
| C  | 13.353710000000000 | 8.590830000000000  | 6.788380000000000 |
| C  | 10.198650000000001 | 6.719510000000000  | 6.819870000000000 |
| C  | 9.850770000000001  | 8.133640000000000  | 6.884700000000000 |
| C  | 11.549239999999999 | 15.242830000000000 | 6.697460000000000 |
| C  | 8.496380000000000  | 8.549070000000000  | 6.986290000000000 |
| C  | 15.130860000000000 | 11.726200000000000 | 7.014090000000000 |
| C  | 11.878250000000000 | 13.847670000000001 | 6.816340000000000 |
| C  | 13.726270000000000 | 12.195589999999999 | 6.942840000000000 |
| C  | 15.047129999999999 | 10.332890000000001 | 6.926610000000000 |
| C  | 13.646160000000000 | 9.984010000000000  | 6.858820000000000 |
| C  | 13.254020000000001 | 13.517920000000000 | 6.876300000000000 |
| C  | 6.672860000000000  | 11.669040000000001 | 6.991110000000000 |
| C  | 8.068569999999999  | 12.076589999999999 | 6.900810000000000 |
| C  | 6.660740000000000  | 10.280480000000001 | 7.031980000000000 |
| C  | 8.081849999999999  | 9.896910000000000  | 6.970400000000000 |
| B  | 9.424239999999999  | 16.647160000000000 | 6.257040000000000 |
| B  | 6.943240000000000  | 14.243100000000000 | 6.900910000000000 |
| B  | 12.302429999999999 | 5.356540000000000  | 6.309290000000000 |
| B  | 14.732440000000000 | 7.775380000000000  | 6.845900000000000 |
| B  | 9.114910000000000  | 5.574680000000000  | 6.836240000000000 |
| B  | 12.842409999999999 | 16.141439999999999 | 6.632550000000000 |
| B  | 7.439480000000000  | 7.495670000000000  | 7.105180000000000 |
| B  | 16.444870000000002 | 12.441110000000000 | 7.393400000000000 |
| B  | 15.973190000000001 | 9.060020000000000  | 6.943560000000000 |
| B  | 14.103730000000001 | 14.878060000000000 | 6.769010000000000 |
| B  | 5.728590000000000  | 12.921099999999999 | 7.008060000000000 |
| B  | 5.512340000000000  | 9.205730000000001  | 7.105850000000000 |
| H  | 10.610230000000000 | 11.837540000000001 | 9.462759999999999 |
| H  | 8.318470000000000  | 16.675830000000001 | 5.792280000000000 |
| H  | 10.027170000000000 | 17.682820000000000 | 6.380210000000000 |
| H  | 6.201000000000000  | 13.798080000000001 | 7.923790000000000 |
| H  | 6.766040000000000  | 15.423340000000000 | 6.904840000000000 |
| H  | 11.700749999999999 | 4.326420000000000  | 6.493250000000000 |
| H  | 13.380549999999999 | 5.301880000000000  | 5.785470000000000 |
| H  | 14.882529999999999 | 6.592170000000000  | 6.845120000000000 |
| H  | 15.608840000000001 | 8.239470000000001  | 5.938400000000000 |
| H  | 8.973910000000000  | 4.900990000000000  | 7.828710000000000 |
| H  | 8.695050000000000  | 5.128810000000000  | 5.795240000000000 |
| H  | 13.692080000000001 | 15.617260000000000 | 5.726140000000000 |
| H  | 12.946130000000000 | 17.328420000000001 | 6.526210000000000 |
| H  | 6.223360000000000  | 7.727610000000000  | 7.185640000000000 |
| H  | 7.652070000000000  | 6.278580000000000  | 7.170200000000000 |
| H  | 16.472940000000001 | 13.482790000000000 | 7.988190000000000 |
| H  | 17.484950000000001 | 11.883660000000001 | 7.154080000000000 |
| H  | 15.499620000000000 | 8.201320000000001  | 7.864000000000000 |
| H  | 17.165559999999999 | 8.985840000000000  | 7.004880000000000 |
| H  | 13.668340000000001 | 15.794409999999999 | 7.645450000000000 |
| H  | 15.291180000000001 | 15.000260000000001 | 6.757100000000000 |
| H  | 4.534780000000000  | 12.981370000000000 | 7.080510000000000 |
| H  | 6.076100000000000  | 13.760830000000000 | 6.000540000000000 |
| H  | 4.928400000000000  | 8.885669999999999  | 6.096780000000000 |
| H  | 4.956440000000000  | 8.996290000000000  | 8.158510000000000 |
| O  | 10.876640000000000 | 10.959410000000000 | 9.122600000000000 |
| N  | 10.747900000000000 | 13.075450000000000 | 6.852520000000000 |
| N  | 10.948700000000001 | 8.929600000000001  | 6.824770000000000 |
| N  | 12.862970000000001 | 11.103080000000000 | 6.854620000000000 |
| N  | 8.904880000000000  | 10.981150000000000 | 6.873230000000000 |
| Cu | 10.873279999999999 | 11.018850000000000 | 7.085530000000000 |



Transition Metal: Cu; Functional Group: BH2; Adsorbate: OOH

|    |                    |                    |                    |
|----|--------------------|--------------------|--------------------|
| Cu | 10.867680000000000 | 11.022819999999999 | 7.214910000000000  |
| C  | 10.144180000000000 | 15.324870000000001 | 6.745290000000000  |
| C  | 9.666119999999999  | 13.923670000000000 | 6.844590000000000  |
| C  | 8.335010000000000  | 13.440939999999999 | 6.918410000000000  |
| C  | 11.588749999999999 | 6.673400000000000  | 6.812400000000000  |
| C  | 12.047140000000001 | 8.085410000000000  | 6.851740000000000  |
| C  | 13.353710000000000 | 8.589580000000000  | 6.897630000000000  |
| C  | 10.194780000000000 | 6.725360000000000  | 6.945460000000000  |
| C  | 9.845030000000000  | 8.138400000000001  | 6.991690000000000  |
| C  | 11.541420000000000 | 15.231619999999999 | 6.823000000000000  |
| C  | 8.486490000000000  | 8.544810000000000  | 7.078200000000000  |
| C  | 15.140820000000000 | 11.722670000000001 | 7.099040000000000  |
| C  | 11.875700000000000 | 13.833959999999999 | 6.914840000000000  |
| C  | 13.735590000000000 | 12.193130000000000 | 7.036600000000000  |
| C  | 15.055380000000000 | 10.328550000000000 | 7.012880000000000  |
| C  | 13.654080000000000 | 9.981460000000000  | 6.953960000000000  |
| C  | 13.254120000000000 | 13.513010000000000 | 6.979280000000000  |
| C  | 6.655860000000000  | 11.666779999999999 | 7.064550000000000  |
| C  | 8.052809999999999  | 12.067539999999999 | 6.976450000000000  |
| C  | 6.639440000000000  | 10.277369999999999 | 7.106350000000000  |
| C  | 8.060630000000000  | 9.889239999999999  | 7.047430000000000  |
| B  | 9.416350000000000  | 16.634380000000000 | 6.381340000000000  |
| B  | 6.943740000000000  | 14.241569999999999 | 7.005910000000000  |
| B  | 12.299700000000000 | 5.360600000000000  | 6.442830000000000  |
| B  | 14.730140000000000 | 7.769640000000000  | 6.961060000000000  |
| B  | 9.104730000000000  | 5.584810000000000  | 6.957470000000000  |
| B  | 12.829590000000000 | 16.138290000000001 | 6.782740000000000  |
| B  | 7.441380000000000  | 7.479880000000000  | 7.210920000000000  |
| B  | 16.459959999999999 | 12.436030000000001 | 7.465290000000000  |
| B  | 15.976470000000001 | 9.051819999999999  | 7.038260000000000  |
| B  | 14.096159999999999 | 14.879810000000001 | 6.903380000000000  |
| B  | 5.720680000000000  | 12.926209999999999 | 7.101510000000000  |
| B  | 5.483940000000000  | 9.212830000000000  | 7.180340000000000  |
| H  | 8.328580000000001  | 16.660080000000001 | 5.875100000000000  |
| H  | 10.001070000000000 | 17.673790000000000 | 6.550150000000000  |
| H  | 6.205780000000000  | 13.786149999999999 | 8.027390000000000  |
| H  | 6.774170000000000  | 15.422850000000000 | 7.026640000000000  |
| H  | 11.708530000000000 | 4.328960000000000  | 6.648080000000000  |
| H  | 13.367630000000000 | 5.308610000000000  | 5.898150000000000  |
| H  | 14.876650000000000 | 6.586210000000000  | 6.975220000000000  |
| H  | 15.603550000000000 | 8.220810000000000  | 6.044770000000000  |
| H  | 8.974940000000000  | 4.895750000000000  | 7.941360000000000  |
| H  | 8.692410000000001  | 5.141010000000000  | 5.912000000000000  |
| H  | 13.686360000000001 | 15.635360000000000 | 5.871840000000000  |
| H  | 12.926170000000001 | 17.327459999999999 | 6.697910000000000  |
| H  | 6.225740000000000  | 7.698810000000000  | 7.284410000000000  |
| H  | 7.672230000000000  | 6.264870000000000  | 7.302320000000000  |
| H  | 16.495830000000002 | 13.478050000000000 | 8.058940000000000  |
| H  | 17.496559999999999 | 11.876720000000001 | 7.215190000000000  |
| H  | 15.502520000000001 | 8.206239999999999  | 7.970990000000000  |
| H  | 17.168469999999999 | 8.972149999999999  | 7.096810000000000  |
| H  | 13.649120000000000 | 15.776710000000000 | 7.794880000000000  |
| H  | 15.282539999999999 | 15.008570000000001 | 6.901970000000000  |
| H  | 4.528020000000000  | 12.994850000000000 | 7.183640000000000  |
| H  | 6.069280000000000  | 13.776630000000001 | 6.103210000000000  |
| H  | 4.918360000000000  | 8.870870000000000  | 6.168810000000000  |
| H  | 4.925440000000000  | 9.002210000000000  | 8.230750000000000  |
| N  | 10.746930000000001 | 13.059049999999999 | 6.913220000000000  |
| N  | 10.944240000000001 | 8.935670000000000  | 6.920610000000000  |
| N  | 12.872629999999999 | 11.101139999999999 | 6.953740000000000  |
| N  | 8.884690000000001  | 10.972270000000000 | 6.951970000000000  |
| O  | 10.859055440206641 | 10.998647675359127 | 9.745779873322180  |
| H  | 10.826696436024907 | 9.208737375113882  | 9.193204182228090  |
| O  | 11.061790951522330 | 9.657723405638993  | 10.056656212592642 |

Transition Metal: Cu; Functional Group: CH3; Adsorbate: Clean

|   |                    |                    |                    |
|---|--------------------|--------------------|--------------------|
| H | 9.110260000000000  | 16.242920000000002 | 8.992940000000001  |
| H | 10.555709999999999 | 17.165820000000000 | 8.572110000000000  |
| H | 9.211240000000000  | 17.075720000000000 | 7.428910000000000  |
| H | 6.603740000000000  | 14.216060000000001 | 7.156750000000000  |
| H | 7.194510000000000  | 14.878040000000000 | 8.690110000000001  |
| H | 7.848860000000000  | 15.443960000000001 | 7.143890000000000  |
| H | 12.499000000000001 | 5.613410000000000  | 9.644399999999999  |
| H | 11.967680000000000 | 4.762340000000000  | 8.185840000000001  |
| H | 13.446099999999999 | 5.724200000000000  | 8.152100000000001  |
| H | 14.815379999999999 | 8.713419999999999  | 9.983390000000000  |
| H | 13.552759999999999 | 7.498990000000000  | 10.149260000000000 |
| H | 14.827410000000000 | 7.282760000000000  | 8.938840000000001  |
| H | 9.466590000000000  | 5.289980000000000  | 6.229990000000000  |
| H | 10.028890000000001 | 4.718120000000000  | 7.808670000000000  |
| H | 8.545809999999999  | 5.666680000000000  | 7.694930000000000  |
| H | 12.273830000000000 | 17.255310000000001 | 7.550840000000000  |
| H | 13.667330000000000 | 16.176089999999999 | 7.374240000000000  |
| H | 12.787929999999999 | 16.740700000000000 | 5.942940000000000  |
| H | 8.415229999999999  | 7.056370000000000  | 5.355200000000000  |
| H | 7.161390000000000  | 7.027590000000000  | 6.605710000000000  |
| H | 7.134440000000000  | 8.265290000000000  | 5.338530000000000  |
| H | 16.433479999999999 | 13.374359999999999 | 6.964750000000000  |
| H | 17.328040000000001 | 11.853859999999999 | 6.964540000000000  |
| H | 16.525620000000000 | 12.405650000000000 | 5.485480000000000  |
| H | 16.660409999999999 | 9.605790000000001  | 9.108060000000000  |
| H | 16.274529999999999 | 8.524010000000001  | 7.759730000000000  |
| H | 17.278540000000000 | 9.948490000000000  | 7.485210000000000  |
| H | 14.947089999999999 | 14.764570000000001 | 6.087360000000000  |
| H | 14.719790000000000 | 13.525100000000000 | 4.843220000000000  |
| H | 13.560779999999999 | 14.843620000000000 | 4.985860000000000  |
| H | 4.847200000000000  | 11.588900000000001 | 8.685430000000000  |
| H | 5.799810000000000  | 13.029080000000000 | 9.051100000000000  |
| H | 4.973420000000000  | 12.882190000000000 | 7.487850000000000  |
| H | 5.783080000000000  | 8.419790000000001  | 7.757740000000000  |
| H | 4.724860000000000  | 9.840100000000000  | 7.756070000000000  |
| H | 5.271410000000000  | 9.150440000000000  | 6.226920000000000  |
| C | 10.436600000000000 | 15.258039999999999 | 7.577630000000000  |
| C | 9.926550000000001  | 13.883520000000001 | 7.553880000000000  |
| C | 8.571529999999999  | 13.471240000000000 | 7.684670000000000  |
| C | 11.613680000000000 | 6.890670000000000  | 8.104870000000000  |
| C | 12.009630000000000 | 8.301890000000000  | 8.116560000000000  |
| C | 13.290240000000001 | 8.814539999999999  | 8.455909999999999  |
| C | 10.369500000000000 | 6.827890000000000  | 7.495540000000000  |
| C | 9.965579999999999  | 8.207839999999999  | 7.215510000000000  |
| C | 11.734590000000001 | 15.215070000000001 | 7.092620000000000  |
| C | 8.680830000000000  | 8.641060000000000  | 6.798890000000000  |
| C | 15.184450000000000 | 11.597939999999999 | 7.010990000000000  |
| C | 12.057050000000000 | 13.806940000000001 | 6.878770000000000  |
| C | 13.787430000000001 | 12.021789999999999 | 6.887040000000000  |
| C | 15.178060000000000 | 10.398149999999999 | 7.706850000000000  |
| C | 13.774229999999999 | 10.044840000000001 | 7.931200000000000  |
| C | 13.323520000000000 | 13.296180000000000 | 6.475240000000000  |
| C | 6.762330000000000  | 11.624200000000000 | 7.697590000000000  |
| C | 8.142310000000000  | 12.116820000000001 | 7.624890000000000  |
| C | 6.785450000000000  | 10.297090000000001 | 7.298400000000000  |
| C | 8.188400000000000  | 9.943569999999999  | 7.093360000000000  |
| C | 9.788629999999999  | 16.489580000000000 | 8.165749999999999  |
| C | 7.501750000000000  | 14.556509999999999 | 7.680210000000000  |
| C | 12.420030000000001 | 5.695300000000000  | 8.547390000000000  |
| C | 14.172370000000001 | 8.029800000000000  | 9.415970000000000  |
| C | 9.564959999999999  | 5.568800000000000  | 7.292180000000000  |
| C | 12.663060000000000 | 16.397639999999999 | 6.984240000000000  |
| C | 7.796960000000000  | 7.693650000000000  | 6.000190000000000  |
| C | 16.422809999999998 | 12.342860000000000 | 6.581210000000000  |
| C | 16.402509999999999 | 9.580690000000001  | 8.035890000000000  |
| C | 14.188810000000000 | 14.157510000000000 | 5.566720000000000  |

|    |                    |                    |                   |
|----|--------------------|--------------------|-------------------|
| C  | 5.542370000000000  | 12.322609999999999 | 8.251260000000000 |
| C  | 5.589530000000000  | 9.380530000000000  | 7.257640000000000 |
| Cu | 10.972810000000001 | 11.046580000000001 | 7.369910000000000 |
| N  | 10.970490000000000 | 13.032100000000000 | 7.222410000000000 |
| N  | 10.985200000000001 | 9.061030000000001  | 7.586290000000000 |
| N  | 12.970820000000000 | 11.044820000000000 | 7.424470000000000 |
| N  | 8.978320000000000  | 11.044890000000001 | 7.346710000000000 |

Transition Metal: Cu; Functional Group: CH3; Adsorbate: O

|   |                    |                    |                    |
|---|--------------------|--------------------|--------------------|
| H | 9.094420000000000  | 16.233640000000001 | 8.996050000000000  |
| H | 10.543220000000000 | 17.161760000000001 | 8.598470000000001  |
| H | 9.213080000000000  | 17.076860000000000 | 7.438880000000000  |
| H | 6.617650000000000  | 14.206300000000001 | 7.089940000000000  |
| H | 7.183480000000000  | 14.885920000000000 | 8.625610000000000  |
| H | 7.864040000000000  | 15.435790000000001 | 7.084460000000000  |
| H | 12.491170000000000 | 5.634430000000000  | 9.674480000000001  |
| H | 11.950310000000000 | 4.762710000000000  | 8.231590000000001  |
| H | 13.433330000000000 | 5.716040000000000  | 8.176220000000001  |
| H | 14.806369999999999 | 8.734120000000001  | 9.973360000000000  |
| H | 13.541280000000000 | 7.521280000000000  | 10.147500000000001 |
| H | 14.818440000000001 | 7.293720000000000  | 8.941540000000000  |
| H | 9.448910000000000  | 5.283970000000000  | 6.260800000000000  |
| H | 10.009670000000000 | 4.717550000000000  | 7.842800000000000  |
| H | 8.531350000000000  | 5.672760000000000  | 7.724890000000000  |
| H | 12.293650000000000 | 17.248790000000000 | 7.623220000000000  |
| H | 13.680400000000001 | 16.165310000000002 | 7.425150000000000  |
| H | 12.805030000000000 | 16.763510000000000 | 6.004940000000000  |
| H | 8.420460000000000  | 7.068350000000000  | 5.348640000000000  |
| H | 7.160820000000000  | 7.030020000000000  | 6.595250000000000  |
| H | 7.138040000000000  | 8.277600000000000  | 5.335800000000000  |
| H | 16.442720000000001 | 13.380400000000000 | 6.974010000000000  |
| H | 17.335930000000001 | 11.859170000000001 | 6.963370000000000  |
| H | 16.528430000000000 | 12.419580000000000 | 5.489150000000000  |
| H | 16.658400000000000 | 9.603930000000000  | 9.102959999999999  |
| H | 16.273859999999999 | 8.524609999999999  | 7.751130000000000  |
| H | 17.280210000000000 | 9.948060000000000  | 7.481540000000000  |
| H | 14.949249999999999 | 14.768030000000000 | 6.082650000000000  |
| H | 14.703430000000001 | 13.532750000000000 | 4.835620000000000  |
| H | 13.550240000000001 | 14.856109999999999 | 4.996150000000000  |
| H | 4.847450000000000  | 11.606820000000001 | 8.684680000000000  |
| H | 5.804870000000000  | 13.046970000000000 | 9.037920000000000  |
| H | 4.978260000000000  | 12.888949999999999 | 7.476040000000000  |
| H | 5.792850000000000  | 8.416779999999999  | 7.791780000000000  |
| H | 4.729440000000000  | 9.833360000000001  | 7.799410000000000  |
| H | 5.260150000000000  | 9.141629999999999  | 6.264650000000000  |
| C | 10.439030000000001 | 15.261030000000000 | 7.589530000000000  |
| C | 9.931390000000000  | 13.885730000000001 | 7.550070000000000  |
| C | 8.575450000000000  | 13.470240000000000 | 7.659910000000000  |
| C | 11.606140000000000 | 6.890890000000000  | 8.118410000000001  |
| C | 12.004330000000000 | 8.303319999999999  | 8.111350000000000  |
| C | 13.284580000000000 | 8.821730000000001  | 8.444870000000000  |
| C | 10.360099999999999 | 6.823830000000000  | 7.513450000000000  |
| C | 9.959820000000001  | 8.201940000000000  | 7.221940000000000  |
| C | 11.743240000000000 | 15.221719999999999 | 7.120610000000000  |
| C | 8.676940000000000  | 8.639310000000000  | 6.802640000000000  |
| C | 15.192060000000000 | 11.604830000000000 | 7.010840000000000  |
| C | 12.064520000000000 | 13.815480000000001 | 6.894800000000000  |
| C | 13.796469999999999 | 12.031090000000001 | 6.888040000000000  |
| C | 15.180880000000000 | 10.401000000000000 | 7.699480000000000  |
| C | 13.773650000000000 | 10.050300000000000 | 7.917570000000000  |
| C | 13.329230000000001 | 13.304890000000000 | 6.480260000000000  |
| C | 6.761840000000000  | 11.627150000000000 | 7.696090000000000  |
| C | 8.143520000000001  | 12.115539999999999 | 7.616410000000000  |
| C | 6.782250000000000  | 10.295240000000000 | 7.312540000000000  |
| C | 8.183930000000000  | 9.940569999999999  | 7.105060000000000  |
| C | 9.782200000000000  | 16.486820000000002 | 8.178720000000000  |
| C | 7.506440000000000  | 14.554489999999999 | 7.624180000000000  |
| C | 12.408780000000000 | 5.699250000000000  | 8.576510000000001  |
| C | 14.163940000000000 | 8.045210000000001  | 9.412140000000001  |
| C | 9.549620000000001  | 5.567450000000000  | 7.321560000000000  |
| C | 12.677930000000000 | 16.400780000000001 | 7.039030000000000  |
| C | 7.797420000000000  | 7.699630000000000  | 5.994710000000000  |
| C | 16.430270000000000 | 12.351020000000000 | 6.584820000000000  |
| C | 16.402590000000000 | 9.580510000000000  | 8.030139999999999  |
| C | 14.184089999999999 | 14.166420000000000 | 5.566000000000000  |

|    |                    |                    |                   |
|----|--------------------|--------------------|-------------------|
| C  | 5.544960000000000  | 12.334440000000001 | 8.244400000000001 |
| C  | 5.589130000000000  | 9.375100000000000  | 7.291120000000000 |
| O  | 11.032130000000000 | 10.820860000000000 | 5.126520000000000 |
| Cu | 10.976310000000000 | 11.026880000000000 | 7.111130000000000 |
| N  | 10.980940000000000 | 13.039640000000000 | 7.233070000000000 |
| N  | 10.976070000000000 | 9.056170000000000  | 7.585350000000000 |
| N  | 12.977010000000000 | 11.059060000000001 | 7.424110000000000 |
| N  | 8.975059999999999  | 11.037620000000000 | 7.360860000000000 |

Transition Metal: Cu; Functional Group: CH3; Adsorbate: OH

|   |                    |                    |                    |
|---|--------------------|--------------------|--------------------|
| H | 10.405960000000000 | 11.521220000000000 | 4.718100000000000  |
| H | 9.098310000000000  | 16.231729999999999 | 9.021780000000000  |
| H | 10.547160000000000 | 17.163150000000002 | 8.630830000000000  |
| H | 9.217860000000000  | 17.084969999999998 | 7.469910000000000  |
| H | 6.622710000000000  | 14.216300000000000 | 7.106160000000000  |
| H | 7.190670000000000  | 14.879949999999999 | 8.647320000000001  |
| H | 7.868830000000000  | 15.447229999999999 | 7.111900000000000  |
| H | 12.495660000000001 | 5.643810000000000  | 9.689750000000000  |
| H | 11.945740000000001 | 4.767830000000000  | 8.253220000000001  |
| H | 13.433870000000001 | 5.712520000000000  | 8.187989999999999  |
| H | 14.818840000000000 | 8.739170000000000  | 9.975059999999999  |
| H | 13.552580000000001 | 7.527460000000000  | 10.154940000000000 |
| H | 14.822810000000000 | 7.299710000000000  | 8.941739999999999  |
| H | 9.456239999999999  | 5.293580000000000  | 6.264360000000000  |
| H | 10.015129999999999 | 4.722790000000000  | 7.845230000000000  |
| H | 8.537739999999999  | 5.679940000000000  | 7.729250000000000  |
| H | 12.305619999999999 | 17.249790000000001 | 7.682050000000000  |
| H | 13.691390000000000 | 16.168920000000000 | 7.464060000000000  |
| H | 12.814930000000000 | 16.792410000000000 | 6.055090000000000  |
| H | 8.441580000000000  | 7.084130000000000  | 5.334710000000000  |
| H | 7.183010000000000  | 7.031530000000000  | 6.582530000000000  |
| H | 7.151820000000000  | 8.286870000000000  | 5.330740000000000  |
| H | 16.458520000000000 | 13.379949999999999 | 6.987490000000000  |
| H | 17.344290000000001 | 11.854820000000000 | 6.962180000000000  |
| H | 16.532029999999999 | 12.427270000000000 | 5.495970000000000  |
| H | 16.669550000000001 | 9.602969999999999  | 9.100490000000001  |
| H | 16.277500000000000 | 8.525679999999999  | 7.748910000000000  |
| H | 17.284540000000000 | 9.947880000000000  | 7.476750000000000  |
| H | 14.966030000000000 | 14.773740000000000 | 6.117670000000000  |
| H | 14.713369999999999 | 13.554930000000001 | 4.855940000000000  |
| H | 13.567270000000001 | 14.883530000000000 | 5.032820000000000  |
| H | 4.851900000000000  | 11.603540000000001 | 8.673430000000000  |
| H | 5.807020000000000  | 13.042870000000001 | 9.037280000000001  |
| H | 4.982570000000000  | 12.893280000000001 | 7.472750000000000  |
| H | 5.802480000000000  | 8.420620000000000  | 7.779760000000000  |
| H | 4.737470000000000  | 9.835649999999999  | 7.786830000000000  |
| H | 5.269560000000000  | 9.144940000000000  | 6.252850000000000  |
| C | 10.445380000000000 | 15.268879999999999 | 7.610040000000000  |
| C | 9.937640000000000  | 13.894000000000000 | 7.557070000000000  |
| C | 8.581820000000000  | 13.475450000000000 | 7.666140000000000  |
| C | 11.611300000000000 | 6.895570000000000  | 8.129569999999999  |
| C | 12.009600000000001 | 8.309220000000000  | 8.120540000000000  |
| C | 13.289910000000001 | 8.828780000000000  | 8.452980000000000  |
| C | 10.367580000000000 | 6.829330000000000  | 7.520680000000000  |
| C | 9.970800000000001  | 8.209009999999999  | 7.226270000000000  |
| C | 11.752500000000000 | 15.232360000000000 | 7.147750000000000  |
| C | 8.690270000000000  | 8.646850000000001  | 6.798050000000000  |
| C | 15.199820000000001 | 11.610070000000000 | 7.019470000000000  |
| C | 12.072170000000000 | 13.827240000000000 | 6.909940000000000  |
| C | 13.803850000000001 | 12.038910000000000 | 6.901650000000000  |
| C | 15.187550000000000 | 10.404669999999999 | 7.704200000000000  |
| C | 13.778940000000000 | 10.057710000000000 | 7.924060000000000  |
| C | 13.338690000000000 | 13.315110000000001 | 6.498250000000000  |
| C | 6.767860000000000  | 11.631489999999999 | 7.688490000000000  |
| C | 8.149590000000000  | 12.120609999999999 | 7.612790000000000  |
| C | 6.790380000000000  | 10.300010000000000 | 7.302890000000000  |
| C | 8.193049999999999  | 9.947770000000000  | 7.097740000000000  |
| C | 9.786849999999999  | 16.490490000000001 | 8.206490000000001  |
| C | 7.512330000000000  | 14.559650000000000 | 7.641970000000000  |
| C | 12.410600000000001 | 5.703330000000000  | 8.591860000000000  |
| C | 14.171980000000000 | 8.051720000000000  | 9.416990000000000  |
| C | 9.556020000000000  | 5.574190000000000  | 7.325780000000000  |
| C | 12.688800000000001 | 16.411709999999999 | 7.082930000000000  |
| C | 7.815140000000000  | 7.707950000000000  | 5.984910000000000  |
| C | 16.439029999999999 | 12.353220000000000 | 6.591590000000000  |
| C | 16.408770000000001 | 9.581000000000000  | 8.028790000000001  |

|    |                    |                    |                   |
|----|--------------------|--------------------|-------------------|
| C  | 14.197190000000001 | 14.182910000000000 | 5.593760000000000 |
| C  | 5.549130000000000  | 12.334949999999999 | 8.238700000000000 |
| C  | 5.598030000000000  | 9.378679999999999  | 7.279220000000000 |
| O  | 11.014430000000001 | 10.842930000000001 | 5.070960000000000 |
| Cu | 10.986570000000000 | 11.030720000000001 | 7.109160000000000 |
| N  | 10.985939999999999 | 13.049410000000000 | 7.231340000000000 |
| N  | 10.985780000000000 | 9.062210000000000  | 7.589390000000000 |
| N  | 12.982839999999999 | 11.067280000000000 | 7.434840000000000 |
| N  | 8.983459999999999  | 11.044549999999999 | 7.354880000000000 |

Transition Metal: Cu; Functional Group: CH3; Adsorbate: OOH

|    |                    |                    |                    |
|----|--------------------|--------------------|--------------------|
| Cu | 10.976310000000000 | 11.026880000000000 | 7.111130000000000  |
| H  | 9.094420000000000  | 16.233640000000001 | 8.996050000000000  |
| H  | 10.543220000000000 | 17.161760000000001 | 8.598470000000001  |
| H  | 9.213080000000000  | 17.076860000000000 | 7.438880000000000  |
| H  | 6.617650000000000  | 14.206300000000001 | 7.089940000000000  |
| H  | 7.183480000000000  | 14.885920000000000 | 8.625610000000000  |
| H  | 7.864040000000000  | 15.435790000000001 | 7.084460000000000  |
| H  | 12.491170000000000 | 5.634430000000000  | 9.674480000000001  |
| H  | 11.950310000000000 | 4.762710000000000  | 8.231590000000001  |
| H  | 13.433330000000000 | 5.716040000000000  | 8.176220000000001  |
| H  | 14.806369999999999 | 8.734120000000001  | 9.973360000000000  |
| H  | 13.541280000000000 | 7.521280000000000  | 10.147500000000001 |
| H  | 14.818440000000001 | 7.293720000000000  | 8.941540000000000  |
| H  | 9.448910000000000  | 5.283970000000000  | 6.260800000000000  |
| H  | 10.009670000000000 | 4.717550000000000  | 7.842800000000000  |
| H  | 8.531350000000000  | 5.672760000000000  | 7.724890000000000  |
| H  | 12.293650000000000 | 17.248790000000000 | 7.623220000000000  |
| H  | 13.680400000000001 | 16.165310000000002 | 7.425150000000000  |
| H  | 12.805030000000000 | 16.763510000000000 | 6.004940000000000  |
| H  | 8.420460000000000  | 7.068350000000000  | 5.348640000000000  |
| H  | 7.160820000000000  | 7.030020000000000  | 6.595250000000000  |
| H  | 7.138040000000000  | 8.277600000000000  | 5.335800000000000  |
| H  | 16.442720000000001 | 13.380400000000000 | 6.974010000000000  |
| H  | 17.335930000000001 | 11.859170000000001 | 6.963370000000000  |
| H  | 16.528430000000000 | 12.419580000000000 | 5.489150000000000  |
| H  | 16.658400000000000 | 9.603930000000000  | 9.102959999999999  |
| H  | 16.273859999999999 | 8.524609999999999  | 7.751130000000000  |
| H  | 17.280210000000000 | 9.948060000000000  | 7.481540000000000  |
| H  | 14.949249999999999 | 14.768030000000000 | 6.082650000000000  |
| H  | 14.703430000000001 | 13.532750000000000 | 4.835620000000000  |
| H  | 13.550240000000001 | 14.856109999999999 | 4.996150000000000  |
| H  | 4.847450000000000  | 11.606820000000001 | 8.684680000000000  |
| H  | 5.804870000000000  | 13.046970000000000 | 9.037920000000000  |
| H  | 4.978260000000000  | 12.888949999999999 | 7.476040000000000  |
| H  | 5.792850000000000  | 8.416779999999999  | 7.791780000000000  |
| H  | 4.729440000000000  | 9.833360000000001  | 7.799410000000000  |
| H  | 5.260150000000000  | 9.141629999999999  | 6.264650000000000  |
| C  | 10.439030000000001 | 15.261030000000000 | 7.589530000000000  |
| C  | 9.931390000000000  | 13.885730000000001 | 7.550070000000000  |
| C  | 8.575450000000000  | 13.470240000000000 | 7.659910000000000  |
| C  | 11.606140000000000 | 6.890890000000000  | 8.118410000000001  |
| C  | 12.004330000000000 | 8.303319999999999  | 8.111350000000000  |
| C  | 13.284580000000000 | 8.821730000000001  | 8.444870000000000  |
| C  | 10.360099999999999 | 6.823830000000000  | 7.513450000000000  |
| C  | 9.959820000000001  | 8.201940000000000  | 7.221940000000000  |
| C  | 11.743240000000000 | 15.221719999999999 | 7.120610000000000  |
| C  | 8.676940000000000  | 8.639310000000000  | 6.802640000000000  |
| C  | 15.192060000000000 | 11.604830000000000 | 7.010840000000000  |
| C  | 12.064520000000000 | 13.815480000000001 | 6.894800000000000  |
| C  | 13.796469999999999 | 12.031090000000001 | 6.888040000000000  |
| C  | 15.180880000000000 | 10.401000000000000 | 7.699480000000000  |
| C  | 13.773650000000000 | 10.050300000000000 | 7.917570000000000  |
| C  | 13.329230000000001 | 13.304890000000000 | 6.480260000000000  |
| C  | 6.761840000000000  | 11.627150000000000 | 7.696090000000000  |
| C  | 8.143520000000001  | 12.115539999999999 | 7.616410000000000  |
| C  | 6.782250000000000  | 10.295240000000000 | 7.312540000000000  |
| C  | 8.183930000000000  | 9.940569999999999  | 7.105060000000000  |
| C  | 9.782200000000000  | 16.486820000000002 | 8.178720000000000  |
| C  | 7.506440000000000  | 14.554489999999999 | 7.624180000000000  |
| C  | 12.408780000000000 | 5.699250000000000  | 8.576510000000001  |
| C  | 14.163940000000000 | 8.045210000000001  | 9.412140000000001  |
| C  | 9.549620000000001  | 5.567450000000000  | 7.321560000000000  |
| C  | 12.677930000000000 | 16.400780000000001 | 7.039030000000000  |
| C  | 7.797420000000000  | 7.699630000000000  | 5.994710000000000  |
| C  | 16.430270000000000 | 12.351020000000000 | 6.584820000000000  |
| C  | 16.402590000000000 | 9.580510000000000  | 8.030139999999999  |



|   |                    |                    |                   |
|---|--------------------|--------------------|-------------------|
| C | 14.184089999999999 | 14.166420000000000 | 5.566000000000000 |
| C | 5.544960000000000  | 12.334440000000001 | 8.244400000000001 |
| C | 5.589130000000000  | 9.375100000000000  | 7.291120000000000 |
| N | 10.980940000000000 | 13.039640000000000 | 7.233070000000000 |
| N | 10.976070000000000 | 9.056170000000000  | 7.585350000000000 |
| N | 12.977010000000000 | 11.059060000000001 | 7.424110000000000 |
| N | 8.975059999999999  | 11.037620000000000 | 7.360860000000000 |
| O | 11.047089810749135 | 10.765646452695508 | 4.594642715678256 |
| H | 10.098949002683538 | 12.343659587488414 | 4.942593052602282 |
| O | 10.558666070821193 | 11.982659950073089 | 4.129729734071268 |

Transition Metal: Cu; Functional Group: F; Adsorbate: Clean

|    |                    |                    |                    |
|----|--------------------|--------------------|--------------------|
| Cu | 0.000000000000000  | -0.000001081314558 | -0.003532568066820 |
| C  | 0.685023738038704  | 4.261555580147216  | -0.002246757494202 |
| C  | 1.109615936585288  | 2.880828519134994  | -0.003440471922784 |
| C  | 2.433469288886218  | 2.433342468703180  | -0.001785754459454 |
| C  | -0.685030913595654 | -4.261500059548542 | -0.001728549371425 |
| C  | -1.109645379590656 | -2.880810070076695 | -0.002012688097288 |
| C  | -2.433472550436033 | -2.433291521675812 | -0.001846477195606 |
| C  | 0.685030913595650  | -4.261500059548542 | -0.001728549371425 |
| C  | 1.109645379590656  | -2.880810070076695 | -0.002012688097288 |
| C  | -0.685023738038716 | 4.261555580147216  | -0.002246757494202 |
| C  | 2.433472550436034  | -2.433291521675812 | -0.001846477195606 |
| C  | -4.262036697967133 | 0.685056736519928  | 0.002400420755898  |
| C  | -1.109615936585289 | 2.880828519134994  | -0.003440471922784 |
| C  | -2.881278165124950 | 1.109558266002182  | 0.000713497074318  |
| C  | -4.261993800907307 | -0.685034315322245 | 0.001881845335842  |
| C  | -2.881264729610258 | -1.109569405250852 | 0.000365483522012  |
| C  | -2.433469288886226 | 2.433342468703180  | -0.001785754459454 |
| C  | 4.262036697967138  | 0.685056736519928  | 0.002400420755898  |
| C  | 2.881278165124946  | 1.109558266002182  | 0.000713497074318  |
| C  | 4.261993800907312  | -0.685034315322245 | 0.001881845335842  |
| C  | 2.881264729610268  | -1.109569405250852 | 0.000365483522012  |
| N  | 0.000000000000000  | 2.048761589690984  | -0.004988943557322 |
| N  | 0.000000000000000  | -2.048698263204734 | -0.002636107171396 |
| N  | -2.049161707023394 | 0.000005325405494  | 0.000020873766232  |
| N  | 2.049161707023392  | 0.000005325405494  | 0.000020873766232  |
| F  | 5.349275779044937  | -1.477030777758735 | 0.001467112108568  |
| F  | -5.349360148185420 | 1.476985313851014  | 0.002436438676490  |
| F  | -5.349275779044927 | -1.477030777758735 | 0.001467112108568  |
| F  | -1.476996135696751 | 5.348864318536288  | -0.000312429686041 |
| F  | 1.476996135696758  | 5.348864318536288  | -0.000312429686041 |
| F  | 5.349360148185416  | 1.476985313851014  | 0.002436438676490  |
| F  | -1.476962685313204 | -5.348820529616965 | -0.000782382582017 |
| F  | 1.476962685313202  | -5.348820529616965 | -0.000782382582017 |
| F  | -3.397520244577109 | 3.397561774880284  | -0.000687182324812 |
| F  | 3.397520244577106  | 3.397561774880284  | -0.000687182324812 |
| F  | -3.397590858997855 | -3.397522746516465 | -0.002019168708206 |
| F  | 3.397590858997850  | -3.397522746516465 | -0.002019168708206 |

Transition Metal: Cu; Functional Group: F; Adsorbate: O

|    |                    |                    |                    |
|----|--------------------|--------------------|--------------------|
| Cu | 0.000000000000000  | -0.028464344624986 | 0.257796608745106  |
| C  | 0.685399149749460  | 4.282056856095734  | -0.014003070338838 |
| C  | 1.105719372451950  | 2.897869002276006  | -0.038602777517085 |
| C  | 2.426916747914000  | 2.435481397053012  | -0.009813259973090 |
| C  | -0.685701055836820 | -4.277398046322396 | -0.010684318542175 |
| C  | -1.109006500193253 | -2.895794318852413 | -0.034394279328037 |
| C  | -2.430978201433916 | -2.437585452329952 | -0.006613908573144 |
| C  | 0.685701055836830  | -4.277398046322396 | -0.010684318542175 |
| C  | 1.109006500193248  | -2.895794318852413 | -0.034394279328037 |
| C  | -0.685399149749461 | 4.282056856095734  | -0.014003070338838 |
| C  | 2.430978201433916  | -2.437585452329952 | -0.006613908573144 |
| C  | -4.259914074785847 | 0.685919032442102  | 0.009489768790898  |
| C  | -1.105719372451951 | 2.897869002276006  | -0.038602777517085 |
| C  | -2.877790723457402 | 1.108559280128118  | 0.007678891596770  |
| C  | -4.262259589558184 | -0.685857957129034 | 0.009693437177812  |
| C  | -2.881926515922203 | -1.111386167105639 | 0.008613825521814  |
| C  | -2.426916747914003 | 2.435481397053012  | -0.009813259973090 |
| C  | 4.259914074785848  | 0.685919032442102  | 0.009489768790898  |
| C  | 2.877790723457406  | 1.108559280128118  | 0.007678891596770  |
| C  | 4.262259589558184  | -0.685857957129034 | 0.009693437177812  |
| C  | 2.881926515922206  | -1.111386167105639 | 0.008613825521814  |
| N  | 0.000000000000000  | 2.070990056882404  | -0.081145388835910 |
| N  | 0.000000000000000  | -2.069618791869893 | -0.081161358138658 |
| N  | -2.053073285874540 | -0.003288386708029 | -0.001125176324795 |
| N  | 2.053073285874534  | -0.003288386708029 | -0.001125176324795 |
| F  | 5.349967930894673  | -1.475423050417028 | -0.004693756855115 |
| F  | -5.346012159322191 | 1.477432335947724  | -0.005072261590289 |
| F  | -5.349967930894667 | -1.475423050417028 | -0.004693756855115 |
| F  | -1.479413266988601 | 5.367147025614244  | 0.000077861230600  |
| F  | 1.479413266988612  | 5.367147025614244  | 0.000077861230600  |
| F  | 5.346012159322182  | 1.477432335947724  | -0.005072261590289 |
| F  | -1.478464260751473 | -5.362688040942167 | -0.000100580687122 |
| F  | 1.478464260751476  | -5.362688040942167 | -0.000100580687122 |
| F  | -3.393849999574684 | 3.391836070205274  | 0.009672041016506  |
| F  | 3.393849999574686  | 3.391836070205274  | 0.009672041016506  |
| F  | -3.395827835193479 | -3.395949313364873 | 0.013948245039056  |
| F  | 3.395827835193482  | -3.395949313364873 | 0.013948245039056  |
| O  | 0.000000000000000  | -0.008387453568581 | 2.205238776941336  |

Transition Metal: Cu; Functional Group: F; Adsorbate: OH

|    |                    |                    |                    |
|----|--------------------|--------------------|--------------------|
| Cu | 0.000000000000000  | 0.000968962615088  | 0.248456257717636  |
| C  | 0.685783033693180  | 4.263870116915117  | -0.004946779399756 |
| C  | 1.110257998358962  | 2.883073685681590  | -0.004049618670772 |
| C  | 2.435786453333688  | 2.430185308479272  | -0.016102465362560 |
| C  | -0.685412463490181 | -4.265092620108726 | -0.003479713217260 |
| C  | -1.107424793670887 | -2.882230587840951 | -0.008591733820044 |
| C  | -2.432996557805446 | -2.429359535107412 | -0.011922918038678 |
| C  | 0.685412463490186  | -4.265092620108726 | -0.003479713217260 |
| C  | 1.107424793670894  | -2.882230587840951 | -0.008591733820044 |
| C  | -0.685783033693188 | 4.263870116915117  | -0.004946779399756 |
| C  | 2.432996557805450  | -2.429359535107412 | -0.011922918038678 |
| C  | -4.275890056311402 | 0.684707332609128  | -0.010918269657740 |
| C  | -1.110257998358957 | 2.883073685681590  | -0.004049618670772 |
| C  | -2.893367231995381 | 1.107425213606248  | -0.034808095113895 |
| C  | -4.274620583866472 | -0.686043884746844 | -0.008871239455388 |
| C  | -2.891326164120638 | -1.106741175139330 | -0.031279483532982 |
| C  | -2.435786453333691 | 2.430185308479272  | -0.016102465362560 |
| C  | 4.275890056311392  | 0.684707332609128  | -0.010918269657740 |
| C  | 2.893367231995380  | 1.107425213606248  | -0.034808095113895 |
| C  | 4.274620583866464  | -0.686043884746844 | -0.008871239455388 |
| C  | 2.891326164120644  | -1.106741175139330 | -0.031279483532982 |
| N  | 0.000000000000000  | 2.054669293729136  | -0.009235133594846 |
| N  | 0.000000000000000  | -2.055413198804096 | -0.022818090513518 |
| N  | -2.065278446308167 | 0.000693127800050  | -0.071597380071129 |
| N  | 2.065278446308172  | 0.000693127800050  | -0.071597380071129 |
| F  | 5.359936464849048  | -1.479407628924193 | 0.001045765483168  |
| F  | -5.362179455095591 | 1.477189050830220  | -0.000726548222772 |
| F  | -5.359936464849046 | -1.479407628924193 | 0.001045765483168  |
| F  | -1.476169793956764 | 5.351418107364934  | -0.016179637888559 |
| F  | 1.476169793956760  | 5.351418107364934  | -0.016179637888559 |
| F  | 5.362179455095580  | 1.477189050830220  | -0.000726548222772 |
| F  | -1.477127586525732 | -5.351692023447971 | -0.010153498074260 |
| F  | 1.477127586525730  | -5.351692023447971 | -0.010153498074260 |
| F  | -3.395117404349495 | 3.394871989887766  | 0.001044729860032  |
| F  | 3.395117404349492  | 3.394871989887766  | 0.001044729860032  |
| F  | -3.392177366419588 | -3.393037334404418 | 0.009195150295048  |
| F  | 3.392177366419586  | -3.393037334404418 | 0.009195150295048  |
| H  | 0.000000000000000  | 0.893963891965210  | 2.601176048467192  |
| O  | 0.000000000000000  | -0.016727236414059 | 2.246734387698050  |

Transition Metal: Cu; Functional Group: F; Adsorbate: OOH

|    |                    |                    |                    |
|----|--------------------|--------------------|--------------------|
| Cu | -0.003032493074154 | -0.002384443450818 | 0.008714081361208  |
| C  | 0.682130696888522  | 4.263630592376518  | -0.028853154313683 |
| C  | 1.106316089053390  | 2.882304206832020  | -0.042192684963678 |
| C  | 2.429700806340438  | 2.431992893957404  | -0.040855599719268 |
| C  | -0.687891703881427 | -4.266687128429291 | -0.047066739826938 |
| C  | -1.111659628707596 | -2.885056903945543 | -0.064082090833356 |
| C  | -2.435204628531423 | -2.434042181870979 | -0.060761669666294 |
| C  | 0.682038583920520  | -4.266234253327863 | -0.039816077127764 |
| C  | 1.105023610365774  | -2.884210607229786 | -0.053819286315026 |
| C  | -0.687869250078080 | 4.263803626635430  | -0.033267214495964 |
| C  | 2.428545252458444  | -2.432865580033024 | -0.044303833497170 |
| C  | -4.267050907464094 | 0.683398915608468  | -0.042709152637595 |
| C  | -1.112296451608291 | 2.882600738893114  | -0.049357543796044 |
| C  | -2.885792899399199 | 1.107541961068056  | -0.063779544269046 |
| C  | -4.266753747896301 | -0.686669333352818 | -0.044438109525775 |
| C  | -2.885337003547686 | -1.110180189655626 | -0.066810321926484 |
| C  | -2.435538482507546 | 2.431624487942828  | -0.052831441900504 |
| C  | 4.261470195854890  | 0.684107591586364  | -0.032573171275608 |
| C  | 2.880094526617770  | 1.108025124370634  | -0.052159287594979 |
| C  | 4.261058021214854  | -0.685867096263962 | -0.032449239603988 |
| C  | 2.879341686264524  | -1.109085573843835 | -0.052146209524848 |
| N  | -0.002961391345824 | 2.052547755106904  | -0.055741917916616 |
| N  | -0.003520588990044 | -2.055494197674093 | -0.071567428988804 |
| N  | -2.056009859918284 | -0.001095155200750 | -0.085364864489531 |
| N  | 2.050398237301970  | -0.000149183564986 | -0.071922181512182 |
| F  | 5.348054160309236  | -1.478652555453305 | -0.014126087152442 |
| F  | -5.354646566627324 | 1.476050970584186  | -0.019000739324694 |
| F  | -5.353965410605191 | -1.479234806212609 | -0.022977896152864 |
| F  | -1.480700503087167 | 5.351333736436454  | -0.022444357756774 |
| F  | 1.474627274667456  | 5.350978273978482  | -0.012925362160134 |
| F  | 5.348819895487438  | 1.476589946193438  | -0.013342562037430 |
| F  | -1.480748439235551 | -5.353773730829833 | -0.036223322036496 |
| F  | 1.475253785699640  | -5.352822654372432 | -0.018232379379200 |
| F  | -3.400478020127203 | 3.395206834624950  | -0.034481225434498 |
| F  | 3.393456437796922  | 3.395657313725778  | -0.018751620114590 |
| F  | -3.399379418610074 | -3.397138753055028 | -0.040778585834238 |
| F  | 3.392138611074464  | -3.396289886495069 | -0.020123912518122 |
| H  | -1.172264243295352 | 0.539711828456648  | 3.918050378595684  |
| O  | 0.096703286992234  | 0.177629267350408  | 2.587262661282406  |
| O  | -1.009069519770492 | -0.211381851466296 | 3.294939694382828  |

Transition Metal: Cu; Functional Group: H; Adsorbate: Clean

|    |                    |                    |                    |
|----|--------------------|--------------------|--------------------|
| Cu | 0.000000000000000  | -0.000087667348232 | 0.024140526004930  |
| C  | 0.685115481583826  | 4.253648141163142  | -0.013976395651596 |
| C  | 1.106054696616578  | 2.866019089887332  | 0.005265066946756  |
| C  | 2.436534270681486  | 2.436590250562252  | 0.006272424124262  |
| C  | -0.685096629137956 | -4.253638683357259 | -0.012895862947062 |
| C  | -1.106049075125071 | -2.866045692519958 | 0.005450111863230  |
| C  | -2.436554972076660 | -2.436602168745637 | 0.007334014925342  |
| C  | 0.685096629137958  | -4.253638683357259 | -0.012895862947062 |
| C  | 1.106049075125074  | -2.866045692519958 | 0.005450111863230  |
| C  | -0.685115481583821 | 4.253648141163142  | -0.013976395651596 |
| C  | 2.436554972076664  | -2.436602168745637 | 0.007334014925342  |
| C  | -4.253460771298872 | 0.685117249580226  | -0.001678107101270 |
| C  | -1.106054696616578 | 2.866019089887332  | 0.005265066946756  |
| C  | -2.865815806797492 | 1.106027936244540  | 0.010255535054018  |
| C  | -4.253393342920706 | -0.685080576873872 | -0.000957445029293 |
| C  | -2.865748806551661 | -1.106069693152524 | 0.010986151744230  |
| C  | -2.436534270681491 | 2.436590250562252  | 0.006272424124262  |
| C  | 4.253460771298876  | 0.685117249580226  | -0.001678107101270 |
| C  | 2.865815806797488  | 1.106027936244540  | 0.010255535054018  |
| C  | 4.253393342920702  | -0.685080576873872 | -0.000957445029293 |
| C  | 2.865748806551652  | -1.106069693152524 | 0.010986151744230  |
| N  | 0.000000000000000  | 2.035838764517584  | 0.016940952413748  |
| N  | 0.000000000000000  | -2.035848670018613 | 0.016054175730872  |
| N  | -2.035516953305351 | 0.000039130547676  | 0.018080535870532  |
| N  | 2.035516953305352  | 0.000039130547676  | 0.018080535870532  |
| H  | 5.107541822562732  | -1.359844190764495 | -0.009088110122228 |
| H  | -5.107551988498793 | 1.360084519254266  | -0.010911497859297 |
| H  | -5.107541822562720 | -1.359844190764495 | -0.009088110122228 |
| H  | -1.359969499588509 | 5.107731261064387  | -0.027948471752428 |
| H  | 1.359969499588506  | 5.107731261064387  | -0.027948471752428 |
| H  | 5.107551988498789  | 1.360084519254266  | -0.010911497859297 |
| H  | -1.359881768709510 | -5.107764347830479 | -0.025649640841142 |
| H  | 1.359881768709508  | -5.107764347830479 | -0.025649640841142 |
| H  | -3.208799602987852 | 3.208749722504472  | -0.002173491034390 |
| H  | 3.208799602987848  | 3.208749722504472  | -0.002173491034390 |
| H  | -3.208835480713560 | -3.208703161139322 | -0.000087645264692 |
| H  | 3.208835480713568  | -3.208703161139322 | -0.000087645264692 |

Transition Metal: Cu; Functional Group: H; Adsorbate: O

|    |                    |                    |                    |
|----|--------------------|--------------------|--------------------|
| Cu | 0.000000000000000  | -0.000893258760210 | 0.240593393716536  |
| C  | 0.685361304982324  | 4.253791343425871  | -0.015673568381153 |
| C  | 1.107248480051892  | 2.866661701439852  | 0.001706497296714  |
| C  | 2.437535537125748  | 2.434767983974182  | 0.001610088672424  |
| C  | -0.685249835223026 | -4.254717622441856 | -0.015557531641566 |
| C  | -1.107115467099579 | -2.867303073633398 | -0.002170535420376 |
| C  | -2.437302332632587 | -2.435088188675859 | 0.001465204134010  |
| C  | 0.685249835223030  | -4.254717622441856 | -0.015557531641566 |
| C  | 1.107115467099580  | -2.867303073633398 | -0.002170535420376 |
| C  | -0.685361304982326 | 4.253791343425871  | -0.015673568381153 |
| C  | 2.437302332632590  | -2.435088188675859 | 0.001465204134010  |
| C  | -4.260043339347664 | 0.684814602164854  | -0.006746306937810 |
| C  | -1.107248480051890 | 2.866661701439852  | 0.001706497296714  |
| C  | -2.871330915401099 | 1.105345346095784  | -0.009117337217734 |
| C  | -4.259897696545824 | -0.685186205896407 | -0.005567204135275 |
| C  | -2.871101190486854 | -1.105553231524638 | -0.008229085304294 |
| C  | -2.437535537125747 | 2.434767983974182  | 0.001610088672424  |
| C  | 4.260043339347664  | 0.684814602164854  | -0.006746306937810 |
| C  | 2.871330915401104  | 1.105345346095784  | -0.009117337217734 |
| C  | 4.259897696545828  | -0.685186205896407 | -0.005567204135275 |
| C  | 2.871101190486856  | -1.105553231524638 | -0.008229085304294 |
| N  | 0.000000000000000  | 2.040355665844966  | 0.001727970477694  |
| N  | 0.000000000000000  | -2.041314983525123 | -0.006800547236729 |
| N  | -2.045311008291534 | 0.000081229169276  | -0.027420669138326 |
| N  | 2.045311008291538  | 0.000081229169276  | -0.027420669138326 |
| H  | 5.113507525608586  | -1.360699350822692 | -0.004329533431555 |
| H  | -5.114025686300653 | 1.359872479725840  | -0.006769856119369 |
| H  | -5.113507525608584 | -1.360699350822692 | -0.004329533431555 |
| H  | -1.359829445112346 | 5.108146730765966  | -0.032762118669652 |
| H  | 1.359829445112348  | 5.108146730765966  | -0.032762118669652 |
| H  | 5.114025686300652  | 1.359872479725840  | -0.006769856119369 |
| H  | -1.359853798725791 | -5.108900668474233 | -0.028682840219815 |
| H  | 1.359853798725788  | -5.108900668474233 | -0.028682840219815 |
| H  | -3.208711409588989 | 3.208101828706018  | 0.008775764314000  |
| H  | 3.208711409588990  | 3.208101828706018  | 0.008775764314000  |
| H  | -3.208830471612124 | -3.207934116995300 | 0.012835926784530  |
| H  | 3.208830471612124  | -3.207934116995300 | 0.012835926784530  |
| O  | 0.000000000000000  | -0.024168997565965 | 2.206615393872418  |

Transition Metal: Cu; Functional Group: H; Adsorbate: OH

|    |                    |                    |                    |
|----|--------------------|--------------------|--------------------|
| Cu | 0.000000000000000  | -0.004520693721418 | 0.230152188184790  |
| C  | 0.685584907725002  | 4.254189750654768  | -0.014570612464389 |
| C  | 1.107390567671316  | 2.867192569787840  | -0.001253578790776 |
| C  | 2.437790216442208  | 2.433334550189376  | -0.005950750142462 |
| C  | -0.684975952539300 | -4.257699001379631 | -0.017450763770672 |
| C  | -1.104870885799659 | -2.868496931549803 | -0.013874189465910 |
| C  | -2.435318083800123 | -2.435687244833066 | -0.006531375493806 |
| C  | 0.684975952539296  | -4.257699001379631 | -0.017450763770672 |
| C  | 1.104870885799654  | -2.868496931549803 | -0.013874189465910 |
| C  | -0.685584907725001 | 4.254189750654768  | -0.014570612464389 |
| C  | 2.435318083800126  | -2.435687244833066 | -0.006531375493806 |
| C  | -4.260833578554738 | 0.683287073535530  | -0.008312070719430 |
| C  | -1.107390567671310 | 2.867192569787840  | -0.001253578790776 |
| C  | -2.871803593025675 | 1.103659753713992  | -0.017056413584449 |
| C  | -4.260029697721087 | -0.686757917418944 | -0.006128740567792 |
| C  | -2.870522222691807 | -1.106154120856154 | -0.015304308775564 |
| C  | -2.437790216442213 | 2.433334550189376  | -0.005950750142462 |
| C  | 4.260833578554738  | 0.683287073535530  | -0.008312070719430 |
| C  | 2.871803593025674  | 1.103659753713992  | -0.017056413584449 |
| C  | 4.260029697721090  | -0.686757917418944 | -0.006128740567792 |
| C  | 2.870522222691808  | -1.106154120856154 | -0.015304308775564 |
| N  | 0.000000000000000  | 2.039528570668238  | 0.000295259693430  |
| N  | 0.000000000000000  | -2.042209316876729 | -0.023508998871595 |
| N  | -2.044874275635241 | -0.001049236160718 | -0.037943810530773 |
| N  | 2.044874275635244  | -0.001049236160718 | -0.037943810530773 |
| H  | 5.113601855680656  | -1.362466193958376 | -0.000918395416288 |
| H  | -5.115000786480435 | 1.358191616220906  | -0.004663836599683 |
| H  | -5.113601855680658 | -1.362466193958376 | -0.000918395416288 |
| H  | -1.360305018400634 | 5.108458611051761  | -0.031059612514944 |
| H  | 1.360305018400636  | 5.108458611051761  | -0.031059612514944 |
| H  | 5.115000786480438  | 1.358191616220906  | -0.004663836599683 |
| H  | -1.360329723746414 | -5.111491654069072 | -0.022127702311607 |
| H  | 1.360329723746412  | -5.111491654069072 | -0.022127702311607 |
| H  | -3.209387646461540 | 3.206130144771496  | 0.001672265574554  |
| H  | 3.209387646461544  | 3.206130144771496  | 0.001672265574554  |
| H  | -3.206622547401654 | -3.208772185656436 | 0.010458839728236  |
| H  | 3.206622547401652  | -3.208772185656436 | 0.010458839728236  |
| H  | 0.000000000000000  | 0.931148312214058  | 2.548583020698514  |
| O  | 0.000000000000000  | 0.001433959629178  | 2.246138641985796  |



Transition Metal: Cu; Functional Group: H; Adsorbate: OOH

|    |                    |                    |                    |
|----|--------------------|--------------------|--------------------|
| Cu | 0.059118595633992  | 0.011473440562238  | 0.011554276132296  |
| C  | 0.732811422849978  | 4.261594760892144  | -0.047197465710539 |
| C  | 1.153256654546372  | 2.873397774427948  | -0.043957468261100 |
| C  | 2.484134070215376  | 2.444777949488240  | -0.063014225922944 |
| C  | -0.643161214942882 | -4.238739377807583 | -0.009399822077700 |
| C  | -1.062466925998542 | -2.850410060673735 | 0.008848040554998  |
| C  | -2.394341726406772 | -2.425141213427260 | 0.039711784964446  |
| C  | 0.726190242150054  | -4.239776387057994 | -0.035879943513478 |
| C  | 1.148860254314684  | -2.852182607479982 | -0.036537521559512 |
| C  | -0.636499742083551 | 4.262679696067840  | -0.019517804265657 |
| C  | 2.480346696486316  | -2.425982884732065 | -0.056027218300146 |
| C  | -4.210158698756732 | 0.701104611129266  | 0.027499194657470  |
| C  | -1.058081156384297 | 2.875158820160984  | 0.003059186285102  |
| C  | -2.827848585086670 | 1.124821527790564  | 0.062029851629526  |
| C  | -4.211108803445365 | -0.671629720520780 | 0.029143405702254  |
| C  | -2.829236887980088 | -1.096953164642866 | 0.064351210793356  |
| C  | -2.390682050385248 | 2.452169509948356  | 0.035287042313958  |
| C  | 4.303298043223812  | 0.692769833492772  | -0.079177353728387 |
| C  | 2.915155791213126  | 1.114744908660862  | -0.061145070622551 |
| C  | 4.302323281324668  | -0.677072784839790 | -0.076676224663355 |
| C  | 2.913522440864202  | -1.096728546948114 | -0.057584132243218 |
| N  | 0.047333438074462  | 2.043874353943600  | -0.016506382680780 |
| N  | 0.044253970157696  | -2.021032485263440 | -0.012817956678166 |
| N  | -1.993130763689830 | 0.013479677268698  | 0.111513023693500  |
| N  | 2.086113384687298  | 0.009625488459910  | -0.045450616766260 |
| H  | 5.155392886907038  | -1.353196336324118 | -0.085970370827398 |
| H  | -5.064812633252432 | 1.374540212835496  | -0.000567177327182 |
| H  | -5.066825477122093 | -1.344054648025981 | 0.002670818698022  |
| H  | -1.311979833275466 | 5.116237438724315  | -0.011265049077807 |
| H  | 1.408703372249658  | 5.114473139872739  | -0.069803263966612 |
| H  | 5.157015044013894  | 1.368076555649398  | -0.091163156890390 |
| H  | -1.319946934071016 | -5.091312719097507 | 0.001515682807706  |
| H  | 1.400679738472712  | -5.093825704791703 | -0.054495981690174 |
| H  | -3.158310631491201 | 3.228566938220252  | 0.025002058409468  |
| H  | 3.255457652828710  | 3.217703552747604  | -0.079489071146288 |
| H  | -3.163525206267778 | -3.200193092541749 | 0.031339790729662  |
| H  | 3.250143128850794  | -3.200294754173868 | -0.068960100534964 |
| H  | -1.795000311342207 | 0.022207307150502  | 2.251557700367472  |
| O  | -0.374688585442532 | 0.000439644541564  | 3.475639212457104  |
| O  | -1.709303941640052 | 0.020029346313420  | 3.248571098257802  |

Transition Metal: Cu; Functional Group: NH2; Adsorbate: Clean

|    |                    |                    |                    |
|----|--------------------|--------------------|--------------------|
| Cu | 0.018597806553024  | -0.020131280520751 | -0.031171634556294 |
| C  | 0.871161849121270  | 4.158536117482342  | -0.675375174792276 |
| C  | 1.239429127293788  | 2.771080432221394  | -0.485596019769797 |
| C  | 2.563642767183300  | 2.253460043223168  | -0.503114489083387 |
| C  | -0.773125793470129 | -4.175455988501859 | -0.566449795689504 |
| C  | -1.191605645128512 | -2.825197130186986 | -0.257570560454951 |
| C  | -2.524686066485582 | -2.343637455999733 | -0.214525071101715 |
| C  | 0.589284603800948  | -4.245099105126576 | -0.307547042604803 |
| C  | 0.994810609869460  | -2.922224910406950 | 0.129049183659674  |
| C  | -0.487538596783097 | 4.253212106427488  | -0.414560278344261 |
| C  | 2.318963017871450  | -2.548519329095210 | 0.476445631205998  |
| C  | -4.134820348520467 | 0.825165417139562  | 0.581073924631000  |
| C  | -0.960982469545506 | 2.907874634248178  | -0.148804487324185 |
| C  | -2.782193203377677 | 1.214253321437728  | 0.243420150137348  |
| C  | -4.194044096371892 | -0.558288186096576 | 0.493524476054942  |
| C  | -2.876261057098755 | -1.002438930698197 | 0.087889373190162  |
| C  | -2.317818165904630 | 2.546629768799222  | 0.060637155598574  |
| C  | 4.234454834701141  | 0.554947269516520  | 0.380558622284900  |
| C  | 2.918202420230014  | 0.940524661573674  | -0.101227257307716 |
| C  | 4.146827204979118  | -0.782241299327019 | 0.741789222247304  |
| C  | 2.798986315789952  | -1.214685952801755 | 0.441524567877098  |
| N  | 0.117426430433958  | 2.032632283727110  | -0.152109003921137 |
| N  | -0.096212059547259 | -2.071240059937697 | 0.133307405137312  |
| N  | -2.021214188242883 | 0.084725494096690  | -0.011029555464649 |
| N  | 2.060133623068348  | -0.143950251440334 | -0.042596103875681 |
| N  | 5.212030935422852  | -1.593967596792840 | 1.280051764002170  |
| N  | -5.231163134938351 | 1.698339667285592  | 0.884669654412336  |
| N  | -5.337067524459666 | -1.343448829637858 | 0.758036403972366  |
| N  | -1.241910746093538 | 5.446763560213093  | -0.449741541675888 |
| N  | 1.756238988551430  | 5.249083943960605  | -1.013322721560826 |
| N  | 5.386295131559188  | 1.350624357967912  | 0.476826144853516  |
| N  | -1.614594824141694 | -5.253931758456879 | -1.027326602339677 |
| N  | 1.389940430062246  | -5.390984643647577 | -0.447020363020204 |
| N  | -3.277112843087160 | 3.585200088700890  | 0.080414538723556  |
| N  | 3.629216674939244  | 3.130791687818646  | -0.818549678625562 |
| N  | -3.578012169266323 | -3.266526016146877 | -0.390283641932211 |
| N  | 3.232383059126476  | -3.589855947625868 | 0.752995450725520  |
| H  | -1.397899611456729 | -6.127480688757787 | -0.537201628131726 |
| H  | -1.500287851031569 | -5.430589600228297 | -2.031715015644782 |
| H  | -3.235716535970074 | -4.194463386372870 | -0.670263412137174 |
| H  | -4.325639370242158 | -2.931327313980660 | -0.998728591123648 |
| H  | -5.214384964431375 | 2.047890541206694  | 1.848206047643204  |
| H  | -6.129228123043136 | 1.235744267189246  | 0.726446175755466  |
| H  | -1.903571005033299 | 5.519142051604358  | 0.326541667642044  |
| H  | 1.409571547965556  | 5.785264245637628  | -1.813962573138635 |
| H  | 1.887827229289840  | 5.902369954789978  | -0.232979404800066 |
| H  | 3.291960791190198  | 4.053909572061054  | -1.120321833684809 |
| H  | 4.294990211420850  | 2.729130706866200  | -1.479991136027660 |
| H  | 5.175854631818382  | 2.351824893270944  | 0.471290673828740  |
| H  | 5.987968834293921  | 1.089816013256430  | 1.259767116619308  |
| H  | 6.096010934282871  | -1.411208370146049 | 0.794648296209714  |
| H  | 5.368171401802668  | -1.412932111219774 | 2.278051409410058  |
| H  | 4.153694002542975  | -3.231428468625964 | 1.035466713831824  |
| H  | 2.872751325625726  | -4.288598552355044 | 1.404084752830678  |
| H  | 2.384008587345230  | -5.169071351009451 | -0.538266545080948 |
| H  | 1.071966816181908  | -6.007780066119619 | -1.196582238632438 |
| H  | -5.098706563429209 | -2.324892695647865 | 0.919839752470882  |
| H  | -5.883089790273942 | -0.977041157017130 | 1.541513403961316  |
| H  | -4.238227440088348 | 3.226207334724020  | 0.077679950430424  |
| H  | -3.128090691375981 | 4.281169870237808  | -0.651325960267691 |
| H  | -0.637339124598157 | 6.271419644222902  | -0.466345483173459 |

Transition Metal: Cu; Functional Group: NH2; Adsorbate: O

|    |                    |                    |                    |
|----|--------------------|--------------------|--------------------|
| Cu | 0.034576361242356  | -0.141496123739572 | 0.667216144914808  |
| C  | 0.912859619592052  | 4.116608832848324  | -0.914622236782801 |
| C  | 1.259778488844860  | 2.772903846754690  | -0.486885408998710 |
| C  | 2.574916930117094  | 2.285185328625312  | -0.197468275663390 |
| C  | -0.854673446051855 | -4.120538767992294 | -0.782856982036549 |
| C  | -1.218245253118535 | -2.802143460065064 | -0.305037061633300 |
| C  | -2.545643439487684 | -2.310754555222854 | -0.071429909189209 |
| C  | 0.533686661334684  | -4.195486578564179 | -0.725124655563111 |
| C  | 0.993135672078616  | -2.922808516237549 | -0.208255799171420 |
| C  | -0.468482254583282 | 4.219013167888320  | -0.790446645513235 |
| C  | 2.340828031222798  | -2.583980054963263 | 0.133926974582708  |
| C  | -4.093398968853997 | 0.891452257069850  | 0.760057777226124  |
| C  | -0.927919102770645 | 2.916996861438844  | -0.336847904122060 |
| C  | -2.754400121181192 | 1.239196014089574  | 0.326494805271228  |
| C  | -4.168159818356473 | -0.496464524273875 | 0.742444950528710  |
| C  | -2.878823516030700 | -0.966563084062127 | 0.278796300359314  |
| C  | -2.284384676449719 | 2.563614973992818  | 0.019680171703342  |
| C  | 4.149586154556754  | 0.523144010160416  | 0.814750844562046  |
| C  | 2.893897252696180  | 0.952626487179020  | 0.236806918794646  |
| C  | 4.111725056104302  | -0.865779701066604 | 0.867754368318192  |
| C  | 2.815498189296040  | -1.255347586768302 | 0.356608336046484  |
| N  | 0.120806898428130  | 2.062888156504148  | -0.196315856158012 |
| N  | -0.085566201819987 | -2.087008124461441 | 0.001861825004898  |
| N  | -2.020403047830829 | 0.102150596745258  | 0.091077486309394  |
| N  | 2.077362089794920  | -0.138106886114763 | 0.019312847855158  |
| N  | 5.129064964411319  | -1.761087946414772 | 1.371699233375894  |
| N  | -5.147836641413852 | 1.810440474144010  | 1.106542846810660  |
| N  | -5.303007016203566 | -1.276480341740577 | 1.079303895465178  |
| N  | -1.287727822872007 | 5.383921914825064  | -1.045352246634842 |
| N  | 1.805896906522100  | 5.154453167554486  | -1.304993468967016 |
| N  | 5.225495604388716  | 1.363461128496772  | 1.228487109837822  |
| N  | -1.763158099936216 | -5.153913206814078 | -1.225141516013405 |
| N  | 1.317243133510796  | -5.318935618074029 | -1.069365684954754 |
| N  | -3.190832918230409 | 3.575824076774326  | 0.058741751926764  |
| N  | 3.623239921890976  | 3.165554188711802  | -0.338677292829267 |
| N  | -3.576573892140630 | -3.229987450277957 | -0.160672743708496 |
| N  | 3.265325683467028  | -3.615533875996103 | 0.220464555947534  |
| H  | -1.549960697427682 | -6.057014859388774 | -0.790488184636814 |
| H  | -1.738538154743331 | -5.285558476738370 | -2.242525967336206 |
| H  | -3.312129304581475 | -4.134531390581310 | -0.569538214498223 |
| H  | -4.496993059487203 | -2.869908568671171 | -0.402979715063886 |
| H  | -5.154606669298358 | 2.037878688620984  | 2.107253787029116  |
| H  | -6.070722103815298 | 1.443999186740962  | 0.859918795074932  |
| H  | -0.940963428094125 | 6.213257054128696  | -0.554073428367624 |
| H  | 2.398936821830008  | 4.876134971802094  | -2.093045540927456 |
| H  | 1.292015321640272  | 5.995869627161106  | -1.581718155555070 |
| H  | 3.422618601649454  | 4.164325201531168  | -0.333787104688419 |
| H  | 4.550749525916472  | 2.855220247707468  | -0.052448612181173 |
| H  | 4.930273969938378  | 2.007794119005558  | 1.969355066610514  |
| H  | 6.000281152879304  | 0.806666773212538  | 1.599485030022044  |
| H  | 6.049933090157968  | -1.568879166254586 | 0.967117189320198  |
| H  | 5.217442450379184  | -1.705305034862587 | 2.392335289793600  |
| H  | 4.156916654169088  | -3.338384552304891 | 0.650171086162396  |
| H  | 2.903593890630800  | -4.521608217183237 | 0.511956279440850  |
| H  | 2.222533253246434  | -5.068057042624483 | -1.471331800689676 |
| H  | 0.822361339331162  | -5.952135744319060 | -1.701035788500512 |
| H  | -5.046231723574419 | -2.149653734727199 | 1.545735071887834  |
| H  | -5.945010695427053 | -0.759829728675406 | 1.686272368737812  |
| H  | -4.163083644940993 | 3.350205982105356  | 0.281469808315286  |
| H  | -2.888049462181172 | 4.502572928558606  | -0.252921482806602 |
| H  | -1.341644527056804 | 5.612665849475256  | -2.043692590061056 |
| O  | 0.204848157570526  | 0.362183324740970  | 2.392741533949152  |

## Transition Metal: Cu; Functional Group: NH2; Adsorbate: OH

|    |                    |                    |                    |
|----|--------------------|--------------------|--------------------|
| Cu | 0.031481948033880  | -0.025761127193334 | 0.486180968904806  |
| C  | 0.912079064190066  | 4.015901495099258  | -1.108298145659393 |
| C  | 1.268281362046470  | 2.751506638372118  | -0.503049812826770 |
| C  | 2.578362594656658  | 2.293485909044772  | -0.151228526898556 |
| C  | -0.841576076279438 | -4.096923481351860 | -0.794539169571028 |
| C  | -1.211818613324549 | -2.788647182008081 | -0.290401080348488 |
| C  | -2.531531597172034 | -2.294646745248873 | -0.047585931477869 |
| C  | 0.544721428619482  | -4.174208631400028 | -0.704997183807961 |
| C  | 0.988646904169578  | -2.910842057365866 | -0.144159692626494 |
| C  | -0.472907309700503 | 4.125219196913284  | -1.005087652389474 |
| C  | 2.319074494718446  | -2.567477925002414 | 0.244845353280962  |
| C  | -4.039576897868004 | 0.907919322005050  | 0.851122685515814  |
| C  | -0.929718471473628 | 2.900459041896962  | -0.381157112979608 |
| C  | -2.722827387507714 | 1.262606408364766  | 0.368621595760918  |
| C  | -4.109880624944983 | -0.480150849236786 | 0.835619655680122  |
| C  | -2.840136156669722 | -0.950064153146297 | 0.323143526211972  |
| C  | -2.276761009004471 | 2.577509232550962  | 0.019431304613032  |
| C  | 4.113823541859136  | 0.547478252958934  | 0.928946816982108  |
| C  | 2.879971943750040  | 0.975187754767392  | 0.302182850456238  |
| C  | 4.051221477349538  | -0.837015447035597 | 1.024614177603608  |
| C  | 2.771781333828400  | -1.232798281654834 | 0.477250551953960  |
| N  | 0.129169614572678  | 2.081708112043760  | -0.117074848317472 |
| N  | -0.090589632383779 | -2.084330798914017 | 0.061909471566788  |
| N  | -1.990845804106058 | 0.121802782363886  | 0.102832754048208  |
| N  | 2.055778874287902  | -0.119654525838044 | 0.083821169451970  |
| N  | 5.047202431327560  | -1.720689684580531 | 1.579631310339186  |
| N  | -5.083006399786427 | 1.824028438353410  | 1.221739025931880  |
| N  | -5.227563976260070 | -1.262488726349986 | 1.219027803752596  |
| N  | -1.307987569186466 | 5.228618543576315  | -1.418882146672878 |
| N  | 1.812650824125600  | 4.978090760171368  | -1.662520348352864 |
| N  | 5.199214888587002  | 1.361333688853996  | 1.332666663624910  |
| N  | -1.747031029608639 | -5.115614348514972 | -1.273617785652220 |
| N  | 1.342196759827318  | -5.283289972667831 | -1.058895016999912 |
| N  | -3.179062158217601 | 3.602134672744614  | 0.058264699006474  |
| N  | 3.606720874682164  | 3.218885113095620  | -0.185630037880877 |
| N  | -3.574317119150503 | -3.203872821347776 | -0.139392938332811 |
| N  | 3.251073473870932  | -3.593697727736675 | 0.351893468222044  |
| H  | -1.512170415428923 | -6.037958175115865 | -0.894540354989882 |
| H  | -1.743007039886351 | -5.191632821996286 | -2.296849496928612 |
| H  | -3.315904901957374 | -4.105131887860569 | -0.557967373175899 |
| H  | -4.488037102615380 | -2.835887162450618 | -0.395054530179799 |
| H  | -4.992878777042296 | 2.151978133860734  | 2.189549904922450  |
| H  | -6.011914515358114 | 1.411306182897556  | 1.111022153137108  |
| H  | -0.906412529089131 | 6.134177016717840  | -1.160967983641506 |
| H  | 2.327586221984664  | 4.592378071793156  | -2.460881651854098 |
| H  | 1.303387770719598  | 5.798812146477498  | -2.003131243092469 |
| H  | 3.389084446381074  | 4.154068385247412  | -0.525913763647090 |
| H  | 4.559892581883839  | 2.886323549261814  | -0.299626551908009 |
| H  | 4.891879451168927  | 2.238067959996556  | 1.759406954723866  |
| H  | 5.810297460583234  | 0.870712283976106  | 1.989844408568034  |
| H  | 5.996623812964453  | -1.451149241233846 | 1.308472951503532  |
| H  | 5.007605932540255  | -1.752024905705074 | 2.604410138967888  |
| H  | 4.135102721148586  | -3.307072270957864 | 0.789723154795692  |
| H  | 2.889536476326644  | -4.494423064488863 | 0.661153354448232  |
| H  | 2.275903875016646  | -5.019143286749257 | -1.378167449618545 |
| H  | 0.891001745359542  | -5.879171209871409 | -1.755984700606909 |
| H  | -4.948531729140432 | -2.161104098444106 | 1.618936075437508  |
| H  | -5.811941831761171 | -0.770644074882803 | 1.899751375439450  |
| H  | -4.158148386621059 | 3.376032361901192  | 0.238905754631882  |
| H  | -2.897223612833180 | 4.494476428090900  | -0.352089693224524 |
| H  | -1.472415993858132 | 5.236860012661609  | -2.431293912710956 |
| H  | 0.088730075734376  | 1.107103183062318  | 2.669463180676634  |
| O  | 0.105896402800646  | 0.153023396051684  | 2.469467322957314  |

Transition Metal: Cu; Functional Group: NH2; Adsorbate: OOH

|    |                    |                    |                    |
|----|--------------------|--------------------|--------------------|
| Cu | -0.010998696915362 | 0.062450451551636  | 0.177436988334968  |
| C  | 0.901639673880474  | 3.999352848437512  | -1.165107877289099 |
| C  | 1.260039015114916  | 2.741207367986044  | -0.550982671254555 |
| C  | 2.572783174614406  | 2.287591802866740  | -0.224328536177282 |
| C  | -0.904187412788659 | -4.008221127622368 | -0.721355345505089 |
| C  | -1.296256429658044 | -2.725152137982427 | -0.190712310477842 |
| C  | -2.616095426864810 | -2.223683288283166 | -0.038366813368956 |
| C  | 0.477647410613898  | -4.106057279707123 | -0.573340423606496 |
| C  | 0.912636943108826  | -2.875452350460336 | 0.048021679996474  |
| C  | -0.474868409332469 | 4.138845666545672  | -1.015479703845273 |
| C  | 2.241072466202104  | -2.544433013883975 | 0.430666810787816  |
| C  | -4.077959676139075 | 1.002642828838822  | 0.844915735125162  |
| C  | -0.942349959571246 | 2.934052897107318  | -0.368382078547913 |
| C  | -2.759989759817913 | 1.340175095764440  | 0.355447932831164  |
| C  | -4.178133190149813 | -0.382602815166216 | 0.803246690083264  |
| C  | -2.917877835632325 | -0.869253005355976 | 0.282611120626416  |
| C  | -2.285529050074867 | 2.651901807645238  | 0.050869327987544  |
| C  | 4.096832073357186  | 0.569092248989780  | 0.898610299157650  |
| C  | 2.867264419061448  | 0.984671815799012  | 0.249780991546996  |
| C  | 3.999358270933252  | -0.801884265140195 | 1.091558357699446  |
| C  | 2.711172490940236  | -1.207869519838447 | 0.574280890750570  |
| N  | 0.114395413547978  | 2.093379540374510  | -0.123610193949929 |
| N  | -0.176177131946250 | -2.041062212177366 | 0.265192140821884  |
| N  | -2.056418580771570 | 0.190455964615374  | 0.052815817989876  |
| N  | 2.021522783097120  | -0.106446847484751 | 0.102348516606496  |
| N  | 4.983038739141034  | -1.666106796019886 | 1.690868792421124  |
| N  | -5.109325306046040 | 1.923423006828726  | 1.219867942050002  |
| N  | -5.307835123201945 | -1.139265672072078 | 1.191614316633972  |
| N  | -1.297322253428817 | 5.251242772686174  | -1.424906897584407 |
| N  | 1.792302093663512  | 4.935859203102024  | -1.769974260666718 |
| N  | 5.196426974161690  | 1.374568670977666  | 1.253403291580420  |
| N  | -1.785316740671984 | -5.000792964842971 | -1.283454255059048 |
| N  | 1.272168047776654  | -5.201831024633698 | -0.955370975047778 |
| N  | -3.153985679772809 | 3.711559026674432  | 0.160464424521036  |
| N  | 3.620850558528974  | 3.219422375120492  | -0.267637564658813 |
| N  | -3.684394421939587 | -3.124117020042604 | -0.155959293129566 |
| N  | 3.163278603478624  | -3.595830432495092 | 0.562260740528764  |
| H  | -1.482845471453018 | -5.946528066092620 | -1.032382090395284 |
| H  | -1.827392964526304 | -4.951769655097840 | -2.307521774555454 |
| H  | -3.396652422554276 | -4.039048914256632 | -0.521779128766521 |
| H  | -4.513573287351331 | -2.750848142632595 | -0.617348073639544 |
| H  | -4.961589408997861 | 2.331929604113692  | 2.148537779286984  |
| H  | -6.031174314187542 | 1.482050061156178  | 1.205533373904342  |
| H  | -0.878126399004614 | 6.152342671455449  | -1.181083907563568 |
| H  | 2.305858587892054  | 4.518854581293134  | -2.552342443694389 |
| H  | 1.278203466323434  | 5.740548920702260  | -2.138606174359762 |
| H  | 3.365670155367358  | 4.142868831678550  | -0.618030623093020 |
| H  | 4.513886700415625  | 2.877534588679446  | -0.618286421128836 |
| H  | 4.929054807286052  | 2.341464058152872  | 1.447942990813834  |
| H  | 5.717014861838386  | 0.987498424958264  | 2.043387699742698  |
| H  | 5.936102651241733  | -1.369690253992829 | 1.464690618043914  |
| H  | 4.897898935028148  | -1.701207848400013 | 2.712715603926202  |
| H  | 4.065013612958850  | -3.283379218485706 | 0.942998266546096  |
| H  | 2.799376325273660  | -4.418517905520345 | 1.043001967842434  |
| H  | 2.258834068601972  | -4.959863002626548 | -1.063495731945608 |
| H  | 0.919089943841624  | -5.678951528984623 | -1.786575625836743 |
| H  | -5.067378810977258 | -2.110169874647678 | 1.402566408222610  |
| H  | -5.785259416959709 | -0.725861401575973 | 1.996597565603446  |
| H  | -4.147798268909899 | 3.493481264252040  | 0.242819570543040  |
| H  | -2.861054063674398 | 4.581014834860112  | -0.290863391503336 |
| H  | -1.482217618689276 | 5.252490457266926  | -2.433480512071032 |
| H  | -0.047430478521970 | -1.743546539042386 | 2.166728084203664  |
| O  | 0.143105717235946  | 0.041746232250336  | 2.704115476551164  |
| O  | 0.229540184505758  | -1.308823741715678 | 3.028325215252330  |

Transition Metal: Cu; Functional Group: OH; Adsorbate: Clean

|    |                    |                    |                   |
|----|--------------------|--------------------|-------------------|
| H  | 9.411799999999999  | 16.880220000000001 | 8.187770000000000 |
| H  | 7.980410000000000  | 15.239369999999999 | 7.228940000000000 |
| H  | 12.428550000000000 | 5.365150000000000  | 6.499540000000000 |
| H  | 14.036890000000000 | 6.761810000000000  | 7.502990000000000 |
| H  | 10.101920000000000 | 4.850940000000000  | 7.891290000000000 |
| H  | 11.973100000000001 | 17.135370000000002 | 7.459720000000000 |
| H  | 6.725330000000000  | 7.973740000000000  | 8.388990000000000 |
| H  | 17.123519999999999 | 11.991099999999999 | 8.333270000000001 |
| H  | 16.087340000000001 | 8.626180000000000  | 7.759200000000000 |
| H  | 15.261210000000000 | 14.058600000000000 | 8.416610000000000 |
| H  | 5.907190000000000  | 13.379250000000001 | 7.533160000000000 |
| H  | 4.861100000000000  | 10.026100000000000 | 8.169079999999999 |
| C  | 10.320750000000000 | 15.244270000000000 | 7.618080000000000 |
| C  | 9.907380000000000  | 13.869619999999999 | 7.659700000000000 |
| C  | 8.580819999999999  | 13.417780000000000 | 7.535830000000000 |
| C  | 11.666399999999999 | 6.784070000000000  | 7.611350000000000 |
| C  | 12.086420000000000 | 8.155830000000000  | 7.683330000000000 |
| C  | 13.419490000000000 | 8.600220000000000  | 7.620120000000000 |
| C  | 10.309030000000000 | 6.741810000000000  | 7.854550000000000 |
| C  | 9.884490000000000  | 8.117419999999999  | 8.008680000000000 |
| C  | 11.685790000000001 | 15.283910000000001 | 7.813430000000000 |
| C  | 8.552040000000000  | 8.559780000000000  | 8.159330000000001 |
| C  | 15.223030000000000 | 11.677420000000000 | 8.146540000000000 |
| C  | 12.108950000000000 | 13.909610000000001 | 7.981150000000000 |
| C  | 13.854210000000000 | 12.122930000000000 | 8.068840000000000 |
| C  | 15.234730000000001 | 10.318569999999999 | 7.934800000000000 |
| C  | 13.854830000000000 | 9.925240000000001  | 7.763760000000000 |
| C  | 13.439610000000000 | 13.468850000000000 | 8.153499999999999 |
| C  | 6.759210000000000  | 11.698760000000000 | 7.809130000000000 |
| C  | 8.143760000000000  | 12.093570000000000 | 7.687330000000000 |
| C  | 6.766740000000000  | 10.346310000000001 | 8.060499999999999 |
| C  | 8.138640000000001  | 9.904330000000000  | 8.045740000000000 |
| O  | 9.478170000000000  | 16.348179999999999 | 7.370820000000000 |
| O  | 7.570770000000000  | 14.346000000000000 | 7.294940000000000 |
| O  | 12.507040000000000 | 5.664690000000000  | 7.426550000000000 |
| O  | 14.436859999999999 | 7.660660000000000  | 7.461140000000000 |
| O  | 9.512110000000000  | 5.630130000000000  | 7.911800000000000 |
| O  | 12.490090000000000 | 16.393920000000001 | 7.830970000000000 |
| O  | 7.621160000000000  | 7.575060000000000  | 8.376150000000001 |
| O  | 16.302479999999999 | 12.515290000000000 | 8.380649999999999 |
| O  | 16.371500000000001 | 9.549519999999999  | 7.928530000000000 |
| O  | 14.365629999999999 | 14.456340000000001 | 8.379600000000000 |
| O  | 5.621650000000000  | 12.463720000000000 | 7.738060000000000 |
| O  | 5.681940000000000  | 9.510619999999999  | 8.277180000000000 |
| Cu | 10.998889999999999 | 11.012090000000001 | 7.868970000000000 |
| N  | 11.007989999999999 | 13.065630000000001 | 7.895370000000000 |
| N  | 10.986700000000001 | 8.960570000000001  | 7.921350000000000 |
| N  | 13.025309999999999 | 11.033930000000000 | 7.829010000000000 |
| N  | 8.973039999999999  | 10.990449999999999 | 7.814500000000000 |

Transition Metal: Cu; Functional Group: OH; Adsorbate: O

|    |                    |                    |                   |
|----|--------------------|--------------------|-------------------|
| H  | 9.461850000000000  | 16.896930000000001 | 7.737400000000000 |
| H  | 7.977910000000000  | 15.267650000000000 | 6.835950000000000 |
| H  | 12.520080000000000 | 5.321120000000000  | 5.849760000000000 |
| H  | 14.011410000000000 | 6.714270000000000  | 7.065410000000000 |
| H  | 10.051930000000000 | 4.787630000000000  | 6.948860000000000 |
| H  | 11.947340000000001 | 17.227150000000002 | 6.729590000000000 |
| H  | 6.675450000000000  | 7.971400000000000  | 7.346580000000000 |
| H  | 17.135770000000001 | 12.000069999999999 | 7.477860000000000 |
| H  | 16.121559999999999 | 8.602160000000000  | 7.350920000000000 |
| H  | 15.291720000000000 | 14.025740000000001 | 7.330690000000000 |
| H  | 5.887230000000000  | 13.406879999999999 | 7.041720000000000 |
| H  | 4.826380000000000  | 10.020120000000000 | 7.272830000000000 |
| C  | 10.314230000000000 | 15.313630000000000 | 6.957270000000000 |
| C  | 9.923380000000000  | 13.923420000000000 | 6.971910000000000 |
| C  | 8.593109999999999  | 13.438190000000001 | 7.002350000000000 |
| C  | 11.663090000000000 | 6.719090000000000  | 6.923970000000000 |
| C  | 12.070300000000000 | 8.089060000000000  | 7.083010000000000 |
| C  | 13.408040000000000 | 8.555140000000000  | 7.133550000000000 |
| C  | 10.283200000000001 | 6.679300000000000  | 7.003940000000000 |
| C  | 9.857040000000000  | 8.055059999999999  | 7.176960000000000 |
| C  | 11.694200000000000 | 15.351240000000001 | 6.983670000000000 |
| C  | 8.519940000000000  | 8.533060000000001  | 7.273910000000000 |
| C  | 15.227819999999999 | 11.670420000000000 | 7.370420000000000 |
| C  | 12.118259999999999 | 13.957560000000001 | 7.040530000000000 |
| C  | 13.852919999999999 | 12.101680000000000 | 7.251810000000000 |
| C  | 15.239870000000000 | 10.294409999999999 | 7.344240000000000 |
| C  | 13.856030000000001 | 9.890530000000000  | 7.221900000000000 |
| C  | 13.449339999999999 | 13.467540000000000 | 7.169300000000000 |
| C  | 6.747160000000000  | 11.711630000000000 | 7.184050000000000 |
| C  | 8.143610000000001  | 12.100660000000000 | 7.132140000000000 |
| C  | 6.738710000000000  | 10.338690000000000 | 7.286370000000000 |
| C  | 8.111240000000000  | 9.895920000000000  | 7.280850000000000 |
| O  | 11.242620000000001 | 11.446149999999999 | 9.495300000000000 |
| O  | 9.437519999999999  | 16.419609999999999 | 6.884560000000000 |
| O  | 7.575740000000000  | 14.368860000000000 | 6.920990000000000 |
| O  | 12.522880000000001 | 5.608150000000000  | 6.784130000000000 |
| O  | 14.418290000000001 | 7.612880000000000  | 7.103090000000000 |
| O  | 9.476290000000001  | 5.576860000000000  | 6.917420000000000 |
| O  | 12.503159999999999 | 16.458010000000002 | 6.963980000000000 |
| O  | 7.568870000000000  | 7.560880000000000  | 7.322290000000000 |
| O  | 16.314340000000001 | 12.526140000000000 | 7.463810000000000 |
| O  | 16.386920000000000 | 9.541800000000000  | 7.416550000000000 |
| O  | 14.402490000000000 | 14.434630000000000 | 7.234090000000000 |
| O  | 5.606050000000000  | 12.472939999999999 | 7.129830000000000 |
| O  | 5.642250000000000  | 9.492419999999999  | 7.359670000000000 |
| Cu | 10.994920000000000 | 10.880940000000001 | 7.822140000000000 |
| N  | 11.031680000000000 | 13.123849999999999 | 7.004200000000000 |
| N  | 10.959420000000000 | 8.885520000000000  | 7.226520000000000 |
| N  | 13.025069999999999 | 10.997520000000000 | 7.162780000000000 |
| N  | 8.959660000000000  | 10.985820000000000 | 7.198860000000000 |

Transition Metal: Cu; Functional Group: OH; Adsorbate: OH

|    |                    |                    |                   |
|----|--------------------|--------------------|-------------------|
| H  | 10.971360000000001 | 10.161590000000000 | 9.714589999999999 |
| H  | 9.480860000000000  | 16.936360000000001 | 7.424870000000000 |
| H  | 7.971460000000000  | 15.265230000000001 | 6.677930000000000 |
| H  | 12.533110000000001 | 5.334740000000000  | 5.684310000000000 |
| H  | 14.023410000000000 | 6.732520000000000  | 6.888730000000000 |
| H  | 10.068099999999999 | 4.797600000000000  | 6.813590000000000 |
| H  | 11.969560000000000 | 17.171759999999999 | 6.450350000000000 |
| H  | 6.695240000000000  | 7.971720000000000  | 7.301210000000000 |
| H  | 17.121710000000000 | 11.994579999999999 | 7.531610000000000 |
| H  | 16.091860000000000 | 8.601950000000000  | 7.248380000000000 |
| H  | 15.286199999999999 | 14.045100000000000 | 7.363080000000000 |
| H  | 5.894070000000000  | 13.404730000000001 | 7.039550000000000 |
| H  | 4.857120000000000  | 10.015760000000000 | 7.349640000000000 |
| C  | 10.319470000000001 | 15.287120000000000 | 6.787280000000000 |
| C  | 9.917270000000000  | 13.907790000000000 | 6.878690000000000 |
| C  | 8.584820000000001  | 13.438219999999999 | 6.886590000000000 |
| C  | 11.672310000000000 | 6.732480000000000  | 6.755270000000000 |
| C  | 12.076620000000000 | 8.105560000000001  | 6.904780000000000 |
| C  | 13.410019999999999 | 8.571380000000000  | 6.960640000000000 |
| C  | 10.295040000000000 | 6.689390000000000  | 6.855310000000000 |
| C  | 9.868460000000001  | 8.066090000000001  | 7.027040000000000 |
| C  | 11.698420000000000 | 15.323320000000001 | 6.846030000000000 |
| C  | 8.535259999999999  | 8.536260000000000  | 7.156150000000000 |
| C  | 15.219189999999999 | 11.672779999999999 | 7.357970000000000 |
| C  | 12.122520000000000 | 13.942850000000000 | 7.001080000000000 |
| C  | 13.854810000000001 | 12.115309999999999 | 7.201630000000000 |
| C  | 15.225440000000001 | 10.300100000000000 | 7.273950000000000 |
| C  | 13.846019999999999 | 9.904350000000001  | 7.085070000000000 |
| C  | 13.453419999999999 | 13.474930000000001 | 7.159290000000000 |
| C  | 6.761310000000000  | 11.711130000000001 | 7.156520000000000 |
| C  | 8.147069999999999  | 12.105070000000000 | 7.017320000000000 |
| C  | 6.765380000000000  | 10.340600000000000 | 7.271770000000000 |
| C  | 8.134950000000000  | 9.896890000000001  | 7.176470000000000 |
| O  | 11.007720000000001 | 11.079079999999999 | 9.384010000000000 |
| O  | 9.451079999999999  | 16.386630000000000 | 6.617210000000000 |
| O  | 7.567400000000000  | 14.370290000000001 | 6.781540000000000 |
| O  | 12.533810000000001 | 5.621950000000000  | 6.618480000000000 |
| O  | 14.427630000000001 | 7.631890000000000  | 6.921500000000000 |
| O  | 9.488939999999999  | 5.584700000000000  | 6.791920000000000 |
| O  | 12.511049999999999 | 16.424579999999999 | 6.771900000000000 |
| O  | 7.586570000000000  | 7.560990000000000  | 7.245990000000000 |
| O  | 16.300850000000001 | 12.521470000000001 | 7.533980000000000 |
| O  | 16.363170000000000 | 9.536420000000000  | 7.359660000000000 |
| O  | 14.396630000000000 | 14.452280000000000 | 7.270240000000000 |
| O  | 5.620650000000000  | 12.474110000000000 | 7.176110000000000 |
| O  | 5.677840000000000  | 9.494050000000000  | 7.426380000000000 |
| Cu | 10.996850000000000 | 11.021800000000001 | 7.415620000000000 |
| N  | 11.026190000000000 | 13.109980000000000 | 7.004920000000000 |
| N  | 10.966950000000001 | 8.900350000000000  | 7.055500000000000 |
| N  | 13.023870000000001 | 11.020410000000000 | 7.027310000000000 |
| N  | 8.971460000000000  | 10.991260000000000 | 7.016210000000000 |



Transition Metal: Cu; Functional Group: OH; Adsorbate: OOH

|    |                    |                    |                   |
|----|--------------------|--------------------|-------------------|
| H  | 9.5315100000000001 | 16.927640000000000 | 6.774650000000000 |
| H  | 8.012000000000000  | 15.319750000000001 | 5.954710000000000 |
| H  | 12.564170000000001 | 5.433470000000000  | 5.084120000000000 |
| H  | 14.054720000000000 | 6.744840000000000  | 6.374040000000000 |
| H  | 10.081890000000000 | 4.881190000000000  | 6.129610000000000 |
| H  | 11.993810000000000 | 17.177879999999998 | 5.722000000000000 |
| H  | 6.696610000000000  | 8.011590000000000  | 6.497010000000000 |
| H  | 17.172460000000001 | 12.012409999999999 | 6.663680000000000 |
| H  | 16.116510000000002 | 8.620660000000001  | 6.584920000000000 |
| H  | 15.346570000000000 | 14.079400000000000 | 6.398710000000000 |
| H  | 5.935350000000000  | 13.463419999999999 | 6.195370000000000 |
| H  | 4.867640000000000  | 10.084500000000000 | 6.495010000000000 |
| H  | 11.107130000000000 | 9.265820000000000  | 8.439510000000000 |
| C  | 10.363750000000000 | 15.298819999999999 | 6.083630000000000 |
| C  | 9.948140000000000  | 13.926570000000000 | 6.172690000000000 |
| C  | 8.611929999999999  | 13.483240000000000 | 6.148680000000000 |
| C  | 11.685250000000000 | 6.796600000000000  | 6.183190000000000 |
| C  | 12.111359999999999 | 8.151490000000001  | 6.361610000000000 |
| C  | 13.446389999999999 | 8.591210000000000  | 6.373250000000000 |
| C  | 10.304539999999999 | 6.766350000000000  | 6.249240000000000 |
| C  | 9.876540000000000  | 8.132099999999999  | 6.433490000000000 |
| C  | 11.742900000000001 | 15.325680000000000 | 6.096950000000000 |
| C  | 8.541740000000001  | 8.587550000000000  | 6.464580000000000 |
| C  | 15.270040000000000 | 11.699040000000000 | 6.499180000000000 |
| C  | 12.168460000000000 | 13.946600000000000 | 6.230970000000000 |
| C  | 13.903549999999999 | 12.141330000000000 | 6.366790000000000 |
| C  | 15.267780000000000 | 10.325030000000000 | 6.508560000000000 |
| C  | 13.883740000000000 | 9.924849999999999  | 6.389790000000000 |
| C  | 13.505920000000000 | 13.494930000000000 | 6.312800000000000 |
| C  | 6.782490000000000  | 11.761979999999999 | 6.316440000000000 |
| C  | 8.172050000000000  | 12.153490000000000 | 6.232060000000000 |
| C  | 6.777780000000000  | 10.392420000000000 | 6.431780000000000 |
| C  | 8.147330000000000  | 9.944080000000000  | 6.406640000000000 |
| O  | 9.507759999999999  | 16.411680000000000 | 5.944850000000000 |
| O  | 7.597940000000000  | 14.428879999999999 | 6.043530000000000 |
| O  | 12.522700000000000 | 5.673400000000000  | 6.030840000000000 |
| O  | 14.464200000000000 | 7.639330000000000  | 6.355140000000000 |
| O  | 9.500330000000000  | 5.667200000000000  | 6.130670000000000 |
| O  | 12.551360000000001 | 16.426570000000002 | 6.004210000000000 |
| O  | 7.588560000000000  | 7.604030000000000  | 6.520480000000000 |
| O  | 16.360440000000001 | 12.547960000000000 | 6.593090000000000 |
| O  | 16.399410000000000 | 9.558160000000001  | 6.628600000000000 |
| O  | 14.454269999999999 | 14.483300000000000 | 6.343940000000000 |
| O  | 5.648220000000000  | 12.532450000000001 | 6.305080000000000 |
| O  | 5.682670000000000  | 9.550750000000001  | 6.547820000000000 |
| O  | 11.170450000000001 | 10.818280000000000 | 9.492910000000000 |
| O  | 11.197780000000000 | 9.466960000000000  | 9.427099999999999 |
| Cu | 11.027790000000000 | 11.063079999999999 | 6.347640000000000 |
| N  | 11.058970000000000 | 13.115480000000000 | 6.282570000000000 |
| N  | 10.997100000000000 | 8.968230000000000  | 6.546750000000000 |
| N  | 13.062910000000000 | 11.038910000000000 | 6.287570000000000 |
| N  | 8.993850000000000  | 11.036880000000000 | 6.269390000000000 |

Transition Metal: Fe; Functional Group: BH2; Adsorbate: Clean

|    |                    |                    |                   |
|----|--------------------|--------------------|-------------------|
| H  | 8.333290000000000  | 16.591390000000001 | 6.156200000000000 |
| H  | 10.016909999999999 | 17.619190000000000 | 6.779770000000000 |
| H  | 6.217640000000000  | 13.805160000000001 | 8.387620000000000 |
| H  | 6.778770000000000  | 15.425400000000000 | 7.360230000000000 |
| H  | 11.700450000000000 | 4.378630000000000  | 6.906350000000000 |
| H  | 13.352270000000001 | 5.378100000000000  | 6.167510000000000 |
| H  | 14.879580000000001 | 6.584670000000000  | 7.302080000000000 |
| H  | 15.608770000000000 | 8.237700000000000  | 6.400020000000000 |
| H  | 8.989260000000000  | 4.940490000000000  | 8.307869999999999 |
| H  | 8.709780000000000  | 5.154550000000000  | 6.275920000000000 |
| H  | 13.706400000000000 | 15.600840000000000 | 6.233460000000000 |
| H  | 12.916600000000001 | 17.293630000000000 | 7.028060000000000 |
| H  | 6.229000000000000  | 7.708330000000000  | 7.642210000000000 |
| H  | 7.669580000000000  | 6.273730000000000  | 7.639390000000000 |
| H  | 16.424700000000001 | 13.414770000000001 | 8.608359999999999 |
| H  | 17.471450000000001 | 11.959080000000000 | 7.574020000000000 |
| H  | 15.495860000000000 | 8.191060000000000  | 8.323050000000000 |
| H  | 17.164459999999998 | 8.980610000000000  | 7.474570000000000 |
| H  | 13.641920000000001 | 15.766500000000001 | 8.151330000000000 |
| H  | 15.286429999999999 | 14.977430000000000 | 7.296230000000000 |
| H  | 4.536500000000000  | 12.992030000000000 | 7.573880000000000 |
| H  | 6.066620000000000  | 13.761229999999999 | 6.467430000000000 |
| H  | 4.903040000000000  | 8.902350000000000  | 6.605950000000000 |
| H  | 4.980680000000000  | 8.986820000000000  | 8.667669999999999 |
| C  | 10.148310000000000 | 15.280130000000000 | 7.060110000000000 |
| C  | 9.672020000000000  | 13.890020000000000 | 7.180340000000000 |
| C  | 8.334949999999999  | 13.438060000000000 | 7.269300000000000 |
| C  | 11.584840000000000 | 6.718230000000000  | 7.133520000000000 |
| C  | 12.043990000000001 | 8.117509999999999  | 7.193200000000000 |
| C  | 13.358060000000000 | 8.590330000000000  | 7.244600000000000 |
| C  | 10.191430000000000 | 6.769970000000000  | 7.291840000000000 |
| C  | 9.843740000000000  | 8.169729999999999  | 7.362700000000000 |
| C  | 11.546460000000000 | 15.188230000000001 | 7.158790000000000 |
| C  | 8.488740000000000  | 8.557869999999999  | 7.463680000000000 |
| C  | 15.114409999999999 | 11.716790000000000 | 7.506640000000000 |
| C  | 11.879560000000000 | 13.803000000000001 | 7.273340000000000 |
| C  | 13.716310000000000 | 12.177450000000000 | 7.435510000000000 |
| C  | 15.045100000000000 | 10.324040000000000 | 7.397480000000000 |
| C  | 13.649240000000001 | 9.972580000000001  | 7.327690000000000 |
| C  | 13.251899999999999 | 13.495210000000000 | 7.361170000000000 |
| C  | 6.669430000000000  | 11.673760000000000 | 7.461810000000000 |
| C  | 8.057359999999999  | 12.074180000000000 | 7.362790000000000 |
| C  | 6.659880000000000  | 10.282940000000000 | 7.513690000000000 |
| C  | 8.071960000000001  | 9.899680000000000  | 7.449340000000000 |
| B  | 9.424490000000000  | 16.577259999999999 | 6.655860000000000 |
| B  | 6.950640000000000  | 14.244120000000001 | 7.352130000000000 |
| B  | 12.290340000000000 | 5.415720000000000  | 6.724970000000000 |
| B  | 14.728199999999999 | 7.767800000000000  | 7.301120000000000 |
| B  | 9.109999999999999  | 5.620490000000000  | 7.316220000000000 |
| B  | 12.830100000000000 | 16.104659999999999 | 7.125730000000000 |
| B  | 7.447180000000000  | 7.492330000000000  | 7.572840000000000 |
| B  | 16.418839999999999 | 12.441000000000001 | 7.905270000000000 |
| B  | 15.972049999999999 | 9.054919999999999  | 7.409580000000000 |
| B  | 14.097870000000000 | 14.854530000000000 | 7.279070000000000 |
| B  | 5.729080000000000  | 12.927510000000000 | 7.484030000000000 |
| B  | 5.508330000000000  | 9.214079999999999  | 7.604490000000000 |
| Fe | 10.860340000000001 | 11.017289999999999 | 7.326330000000000 |
| N  | 10.751780000000000 | 13.001320000000000 | 7.280380000000000 |
| N  | 10.943410000000000 | 8.994130000000000  | 7.299340000000000 |
| N  | 12.839370000000001 | 11.084830000000000 | 7.346620000000000 |
| N  | 8.913840000000000  | 10.979540000000000 | 7.361970000000000 |

Transition Metal: Fe; Functional Group: BH2; Adsorbate: O

|    |                    |                    |                   |
|----|--------------------|--------------------|-------------------|
| C  | 10.149340000000000 | 15.276870000000001 | 6.739260000000000 |
| C  | 9.678960000000000  | 13.882190000000000 | 6.856420000000000 |
| C  | 8.343230000000000  | 13.427149999999999 | 6.918180000000000 |
| C  | 11.580019999999999 | 6.718330000000000  | 6.813540000000000 |
| C  | 12.035629999999999 | 8.124210000000000  | 6.869370000000000 |
| C  | 13.347210000000000 | 8.601870000000000  | 6.896690000000000 |
| C  | 10.190980000000000 | 6.763260000000000  | 6.978680000000000 |
| C  | 9.842990000000000  | 8.169400000000000  | 7.049310000000000 |
| C  | 11.543770000000000 | 15.195650000000001 | 6.846550000000000 |
| C  | 8.486250000000000  | 8.553060000000000  | 7.137970000000000 |
| C  | 15.127929999999999 | 11.718769999999999 | 7.111860000000000 |
| C  | 11.882800000000000 | 13.806310000000000 | 6.962850000000000 |
| C  | 13.725160000000001 | 12.184979999999999 | 7.079350000000000 |
| C  | 15.043850000000001 | 10.328030000000000 | 6.999540000000000 |
| C  | 13.644240000000000 | 9.984590000000001  | 6.962670000000000 |
| C  | 13.257440000000001 | 13.504560000000000 | 7.034950000000000 |
| C  | 6.667710000000000  | 11.666470000000000 | 7.058450000000000 |
| C  | 8.061840000000000  | 12.062700000000000 | 6.989220000000000 |
| C  | 6.650740000000000  | 10.278269999999999 | 7.118180000000000 |
| C  | 8.067729999999999  | 9.893190000000001  | 7.086400000000000 |
| B  | 9.422860000000000  | 16.571770000000001 | 6.323060000000000 |
| B  | 6.957520000000000  | 14.237200000000000 | 6.974610000000000 |
| B  | 12.286370000000000 | 5.418270000000000  | 6.389890000000000 |
| B  | 14.718080000000000 | 7.773070000000000  | 6.926830000000000 |
| B  | 9.097110000000001  | 5.622940000000000  | 6.987230000000000 |
| B  | 12.822760000000001 | 16.115580000000001 | 6.809320000000000 |
| B  | 7.450650000000000  | 7.479500000000000  | 7.257730000000000 |
| B  | 16.447430000000001 | 12.431190000000001 | 7.480080000000000 |
| B  | 15.966469999999999 | 9.052420000000000  | 6.995480000000000 |
| B  | 14.096240000000000 | 14.870390000000000 | 6.952460000000000 |
| B  | 5.731050000000000  | 12.926320000000000 | 7.065910000000000 |
| B  | 5.491660000000000  | 9.217810000000000  | 7.194410000000000 |
| H  | 8.369669999999999  | 16.574100000000001 | 5.746780000000000 |
| H  | 9.978619999999999  | 17.622450000000001 | 6.517950000000000 |
| H  | 6.199030000000000  | 13.796939999999999 | 7.989100000000000 |
| H  | 6.792360000000000  | 15.419710000000000 | 6.981260000000000 |
| H  | 11.726350000000000 | 4.375370000000000  | 6.622070000000000 |
| H  | 13.316710000000000 | 5.391050000000000  | 5.774960000000000 |
| H  | 14.861020000000000 | 6.588480000000000  | 6.930560000000000 |
| H  | 15.578810000000001 | 8.229120000000000  | 6.000810000000000 |
| H  | 8.993900000000000  | 4.907120000000000  | 7.955390000000000 |
| H  | 8.679360000000001  | 5.191870000000000  | 5.938170000000000 |
| H  | 13.695090000000000 | 15.618399999999999 | 5.910790000000000 |
| H  | 12.905049999999999 | 17.305199999999999 | 6.717440000000000 |
| H  | 6.232450000000000  | 7.683000000000000  | 7.298140000000000 |
| H  | 7.691890000000000  | 6.266630000000000  | 7.378350000000000 |
| H  | 16.481510000000000 | 13.445660000000000 | 8.120699999999999 |
| H  | 17.486010000000000 | 11.896910000000000 | 7.186460000000000 |
| H  | 15.510820000000001 | 8.196380000000000  | 7.927340000000000 |
| H  | 17.159790000000001 | 8.975320000000000  | 7.032350000000000 |
| H  | 13.639580000000000 | 15.774410000000000 | 7.830860000000000 |
| H  | 15.282810000000000 | 15.002910000000000 | 6.961270000000000 |
| H  | 4.537320000000000  | 12.994730000000001 | 7.128280000000000 |
| H  | 6.093560000000000  | 13.765260000000000 | 6.064200000000000 |
| H  | 4.928640000000000  | 8.870220000000000  | 6.183600000000000 |
| H  | 4.934590000000000  | 9.007500000000000  | 8.245400000000000 |
| O  | 10.882750000000000 | 11.029230000000000 | 8.908040000000000 |
| N  | 10.759729999999999 | 13.006900000000000 | 6.963080000000000 |
| N  | 10.937160000000000 | 8.988670000000001  | 6.979660000000000 |
| N  | 12.848280000000001 | 11.099720000000000 | 6.997300000000000 |
| N  | 8.907579999999999  | 10.970850000000000 | 6.996720000000000 |
| Fe | 10.860690000000000 | 11.026230000000000 | 7.261040000000000 |

## Transition Metal: Fe; Functional Group: BH2; Adsorbate: OH

|    |                    |                    |                   |
|----|--------------------|--------------------|-------------------|
| C  | 10.146870000000000 | 15.286610000000000 | 6.637770000000000 |
| C  | 9.675219999999999  | 13.894790000000000 | 6.767630000000000 |
| C  | 8.336620000000000  | 13.433240000000000 | 6.816080000000000 |
| C  | 11.579319999999999 | 6.717360000000000  | 6.705430000000000 |
| C  | 12.036490000000001 | 8.122000000000000  | 6.774740000000000 |
| C  | 13.347040000000000 | 8.603960000000001  | 6.798840000000000 |
| C  | 10.188890000000001 | 6.762800000000000  | 6.869640000000000 |
| C  | 9.842590000000000  | 8.169930000000001  | 6.956520000000000 |
| C  | 11.544650000000001 | 15.205190000000000 | 6.734830000000000 |
| C  | 8.483510000000001  | 8.554169999999999  | 7.042770000000000 |
| C  | 15.131530000000000 | 11.725390000000001 | 7.003920000000000 |
| C  | 11.882650000000000 | 13.818770000000001 | 6.862800000000000 |
| C  | 13.728740000000000 | 12.192420000000000 | 6.975780000000000 |
| C  | 15.044810000000000 | 10.333240000000000 | 6.900360000000000 |
| C  | 13.644950000000000 | 9.989580000000000  | 6.871670000000000 |
| C  | 13.258780000000000 | 13.512359999999999 | 6.921910000000000 |
| C  | 6.663120000000000  | 11.669879999999999 | 6.938820000000000 |
| C  | 8.056419999999999  | 12.069419999999999 | 6.887410000000000 |
| C  | 6.649830000000000  | 10.281190000000000 | 7.006360000000000 |
| C  | 8.070200000000000  | 9.899710000000001  | 6.995280000000000 |
| B  | 9.420669999999999  | 16.580890000000000 | 6.217700000000000 |
| B  | 6.947580000000000  | 14.240060000000000 | 6.851920000000000 |
| B  | 12.285340000000000 | 5.416630000000000  | 6.282100000000000 |
| B  | 14.718750000000000 | 7.778240000000000  | 6.815040000000000 |
| B  | 9.092079999999999  | 5.625030000000000  | 6.872880000000000 |
| B  | 12.824850000000000 | 16.122380000000000 | 6.672780000000000 |
| B  | 7.446370000000000  | 7.487590000000000  | 7.144250000000000 |
| B  | 16.453009999999999 | 12.438390000000000 | 7.359790000000000 |
| B  | 15.967700000000001 | 9.056970000000000  | 6.888090000000000 |
| B  | 14.098509999999999 | 14.876420000000000 | 6.812420000000000 |
| B  | 5.723180000000000  | 12.927090000000000 | 6.931230000000000 |
| B  | 5.498500000000000  | 9.209989999999999  | 7.076090000000000 |
| H  | 10.934220000000000 | 11.807720000000000 | 9.578630000000000 |
| H  | 8.361430000000000  | 16.581920000000000 | 5.654180000000000 |
| H  | 9.982290000000001  | 17.631200000000000 | 6.396520000000000 |
| H  | 6.175470000000000  | 13.802910000000001 | 7.857190000000000 |
| H  | 6.780870000000000  | 15.422400000000000 | 6.853700000000000 |
| H  | 11.714860000000000 | 4.375480000000000  | 6.495110000000000 |
| H  | 13.326129999999999 | 5.386990000000000  | 5.685840000000000 |
| H  | 14.864280000000001 | 6.594370000000000  | 6.807330000000000 |
| H  | 15.577260000000001 | 8.243160000000000  | 5.888900000000000 |
| H  | 8.982310000000000  | 4.914030000000000  | 7.844130000000000 |
| H  | 8.689980000000000  | 5.185260000000000  | 5.821620000000000 |
| H  | 13.685060000000000 | 15.612810000000000 | 5.768250000000000 |
| H  | 12.907970000000001 | 17.310749999999999 | 6.565720000000000 |
| H  | 6.226390000000000  | 7.698400000000000  | 7.186170000000000 |
| H  | 7.679330000000000  | 6.269870000000000  | 7.241300000000000 |
| H  | 16.492030000000000 | 13.468420000000000 | 7.974590000000000 |
| H  | 17.488990000000001 | 11.890610000000001 | 7.082560000000000 |
| H  | 15.516270000000000 | 8.196000000000000  | 7.815460000000000 |
| H  | 17.160959999999999 | 8.979910000000000  | 6.921910000000000 |
| H  | 13.654740000000000 | 15.791630000000000 | 7.686300000000000 |
| H  | 15.284910000000000 | 15.006779999999999 | 6.805510000000000 |
| H  | 4.528420000000000  | 12.992360000000000 | 6.978150000000000 |
| H  | 6.096400000000000  | 13.766000000000000 | 5.931600000000000 |
| H  | 4.933490000000000  | 8.870310000000000  | 6.063510000000000 |
| H  | 4.931750000000000  | 9.008380000000001  | 8.124079999999999 |
| O  | 10.874499999999999 | 10.959270000000000 | 9.101470000000001 |
| N  | 10.754870000000000 | 13.022770000000000 | 6.890260000000000 |
| N  | 10.936420000000000 | 8.982749999999999  | 6.902910000000000 |
| N  | 12.852560000000000 | 11.105250000000000 | 6.913140000000000 |
| N  | 8.903490000000000  | 10.973929999999999 | 6.918250000000000 |
| Fe | 10.864350000000000 | 11.030189999999999 | 7.222820000000000 |

Transition Metal: Fe; Functional Group: BH2; Adsorbate: OOH

|    |                    |                    |                    |
|----|--------------------|--------------------|--------------------|
| C  | 10.136780000000000 | 15.265180000000001 | 6.444520000000000  |
| C  | 9.666890000000000  | 13.871580000000000 | 6.590750000000000  |
| C  | 8.330740000000000  | 13.412950000000000 | 6.674020000000000  |
| C  | 11.573100000000000 | 6.695870000000000  | 6.441780000000000  |
| C  | 12.028910000000000 | 8.098630000000000  | 6.548240000000000  |
| C  | 13.339230000000001 | 8.579250000000000  | 6.600420000000000  |
| C  | 10.180479999999999 | 6.738720000000000  | 6.588030000000000  |
| C  | 9.832979999999999  | 8.143060000000000  | 6.705300000000000  |
| C  | 11.534030000000000 | 15.181260000000000 | 6.519660000000000  |
| C  | 8.475490000000001  | 8.527930000000000  | 6.801030000000000  |
| C  | 15.117880000000000 | 11.702360000000001 | 6.822990000000000  |
| C  | 11.872439999999999 | 13.793550000000000 | 6.650900000000000  |
| C  | 13.717430000000000 | 12.168830000000000 | 6.779170000000000  |
| C  | 15.034160000000000 | 10.308059999999999 | 6.727050000000000  |
| C  | 13.636469999999999 | 9.963930000000000  | 6.684610000000000  |
| C  | 13.247730000000001 | 13.489179999999999 | 6.712440000000000  |
| C  | 6.661350000000000  | 11.648560000000000 | 6.803370000000000  |
| C  | 8.051679999999999  | 12.048120000000001 | 6.747870000000000  |
| C  | 6.647530000000000  | 10.256930000000001 | 6.833690000000000  |
| C  | 8.064230000000000  | 9.874370000000001  | 6.803600000000000  |
| B  | 9.403390000000000  | 16.556419999999999 | 6.031540000000000  |
| B  | 6.943090000000000  | 14.219690000000000 | 6.738050000000000  |
| B  | 12.286429999999999 | 5.408120000000000  | 5.995390000000000  |
| B  | 14.709580000000001 | 7.752880000000000  | 6.635800000000000  |
| B  | 9.086470000000000  | 5.600100000000000  | 6.550090000000000  |
| B  | 12.814750000000000 | 16.098130000000001 | 6.447920000000000  |
| B  | 7.434050000000000  | 7.462140000000000  | 6.867040000000000  |
| B  | 16.435220000000001 | 12.420870000000001 | 7.185010000000000  |
| B  | 15.957680000000000 | 9.032900000000000  | 6.726440000000000  |
| B  | 14.087410000000000 | 14.852200000000000 | 6.595120000000000  |
| B  | 5.720220000000000  | 12.905550000000000 | 6.822360000000000  |
| B  | 5.493430000000000  | 9.187220000000000  | 6.871150000000000  |
| H  | 8.321859999999999  | 16.556870000000000 | 5.511410000000000  |
| H  | 9.978300000000001  | 17.605850000000000 | 6.170410000000000  |
| H  | 6.186310000000000  | 13.770040000000000 | 7.750530000000000  |
| H  | 6.774360000000000  | 15.401590000000001 | 6.757630000000000  |
| H  | 11.708489999999999 | 4.361910000000000  | 6.158910000000000  |
| H  | 13.343200000000000 | 5.394530000000000  | 5.426750000000000  |
| H  | 14.854260000000000 | 6.568770000000000  | 6.635650000000000  |
| H  | 15.582120000000000 | 8.216270000000000  | 5.722410000000000  |
| H  | 8.961560000000000  | 4.865840000000000  | 7.501650000000000  |
| H  | 8.692420000000000  | 5.192000000000000  | 5.483300000000000  |
| H  | 13.672700000000001 | 15.582360000000000 | 5.546290000000000  |
| H  | 12.897670000000000 | 17.285799999999998 | 6.331740000000000  |
| H  | 6.214160000000000  | 7.675510000000000  | 6.919890000000000  |
| H  | 7.661340000000000  | 6.241530000000000  | 6.914540000000000  |
| H  | 16.466449999999998 | 13.451150000000000 | 7.799920000000000  |
| H  | 17.475149999999999 | 11.878010000000000 | 6.913190000000000  |
| H  | 15.492770000000000 | 8.172160000000000  | 7.647270000000000  |
| H  | 17.150369999999999 | 8.955330000000000  | 6.777900000000000  |
| H  | 13.645060000000001 | 15.775330000000000 | 7.463240000000000  |
| H  | 15.274300000000000 | 14.982279999999999 | 6.584550000000000  |
| H  | 4.526010000000000  | 12.968909999999999 | 6.888270000000000  |
| H  | 6.075640000000000  | 13.755450000000000 | 5.826580000000000  |
| H  | 4.921270000000000  | 8.891240000000000  | 5.848630000000000  |
| H  | 4.930510000000000  | 8.947419999999999  | 7.912980000000000  |
| H  | 10.391540000000001 | 10.292550000000000 | 10.546480000000001 |
| O  | 10.999739999999999 | 10.981550000000000 | 8.904310000000001  |
| O  | 10.033099999999999 | 10.193479999999999 | 9.638800000000000  |
| N  | 10.747120000000001 | 12.997809999999999 | 6.694180000000000  |
| N  | 10.927310000000000 | 8.958980000000000  | 6.679560000000000  |
| N  | 12.841580000000000 | 11.081280000000000 | 6.715030000000000  |
| N  | 8.900869999999999  | 10.951680000000000 | 6.753330000000000  |
| Fe | 10.856220000000000 | 11.001980000000000 | 6.972560000000000  |

Transition Metal: Fe; Functional Group: CH3; Adsorbate: Clean

|   |                    |                    |                    |
|---|--------------------|--------------------|--------------------|
| H | 9.171239999999999  | 16.221920000000001 | 9.059659999999999  |
| H | 10.610749999999999 | 17.135980000000000 | 8.598430000000000  |
| H | 9.233499999999999  | 17.057160000000000 | 7.494490000000000  |
| H | 6.617840000000000  | 14.209800000000000 | 7.267910000000000  |
| H | 7.229070000000000  | 14.843400000000001 | 8.805630000000001  |
| H | 7.862680000000000  | 15.436660000000000 | 7.260610000000000  |
| H | 12.453560000000000 | 5.669130000000000  | 9.701779999999999  |
| H | 11.945650000000001 | 4.796510000000000  | 8.247660000000000  |
| H | 13.429100000000000 | 5.752380000000000  | 8.226039999999999  |
| H | 14.777300000000000 | 8.763489999999999  | 10.050190000000001 |
| H | 13.515200000000000 | 7.546800000000000  | 10.217150000000000 |
| H | 14.804090000000000 | 7.319800000000000  | 9.023720000000001  |
| H | 9.517790000000000  | 5.322510000000000  | 6.175680000000000  |
| H | 10.040699999999999 | 4.742450000000000  | 7.764500000000000  |
| H | 8.556100000000001  | 5.683900000000000  | 7.618810000000000  |
| H | 12.268039999999999 | 17.240259999999999 | 7.474970000000000  |
| H | 13.664220000000000 | 16.163850000000000 | 7.299420000000000  |
| H | 12.757450000000000 | 16.691929999999999 | 5.870910000000000  |
| H | 8.472410000000000  | 7.091860000000000  | 5.280260000000000  |
| H | 7.181360000000000  | 7.050640000000000  | 6.492310000000000  |
| H | 7.197960000000000  | 8.307869999999999  | 5.244120000000000  |
| H | 16.405560000000001 | 13.357360000000000 | 6.883760000000000  |
| H | 17.294799999999999 | 11.834530000000001 | 6.914620000000000  |
| H | 16.481929999999998 | 12.350009999999999 | 5.428840000000000  |
| H | 16.618030000000001 | 9.659070000000000  | 9.155310000000000  |
| H | 16.252070000000000 | 8.543440000000000  | 7.829220000000000  |
| H | 17.250520000000002 | 9.967850000000000  | 7.531250000000000  |
| H | 14.907810000000000 | 14.746540000000000 | 5.980320000000000  |
| H | 14.672250000000000 | 13.470850000000000 | 4.774550000000000  |
| H | 13.502950000000000 | 14.782810000000000 | 4.900610000000000  |
| H | 4.871800000000000  | 11.535800000000000 | 8.690189999999999  |
| H | 5.818550000000000  | 12.965220000000000 | 9.112040000000000  |
| H | 4.998540000000000  | 12.871869999999999 | 7.540990000000000  |
| H | 5.789530000000000  | 8.420349999999999  | 7.669360000000000  |
| H | 4.739110000000000  | 9.846670000000000  | 7.655970000000000  |
| H | 5.325770000000000  | 9.174759999999999  | 6.134540000000000  |
| C | 10.451689999999999 | 15.231320000000000 | 7.606470000000000  |
| C | 9.942460000000001  | 13.860530000000001 | 7.612850000000000  |
| C | 8.591469999999999  | 13.454549999999999 | 7.760920000000000  |
| C | 11.602430000000000 | 6.924760000000000  | 8.128010000000000  |
| C | 11.994930000000000 | 8.331410000000000  | 8.152550000000000  |
| C | 13.269130000000001 | 8.840990000000000  | 8.505369999999999  |
| C | 10.379130000000000 | 6.856000000000000  | 7.476140000000000  |
| C | 9.975680000000001  | 8.228669999999999  | 7.193890000000000  |
| C | 11.731159999999999 | 15.188350000000000 | 7.074220000000000  |
| C | 8.701420000000001  | 8.653879999999999  | 6.753340000000000  |
| C | 15.151289999999999 | 11.585580000000000 | 6.986220000000000  |
| C | 12.052700000000000 | 13.783970000000000 | 6.870370000000000  |
| C | 13.760910000000001 | 12.009000000000000 | 6.861070000000000  |
| C | 15.145440000000001 | 10.409390000000000 | 7.723460000000000  |
| C | 13.748230000000000 | 10.060800000000000 | 7.961850000000000  |
| C | 13.303369999999999 | 13.275630000000000 | 6.433250000000000  |
| C | 6.790400000000000  | 11.611010000000000 | 7.714230000000000  |
| C | 8.167350000000001  | 12.103630000000001 | 7.675990000000000  |
| C | 6.813310000000000  | 10.299450000000000 | 7.265820000000000  |
| C | 8.212859999999999  | 9.946360000000000  | 7.074850000000000  |
| C | 9.827249999999999  | 16.465720000000001 | 8.213800000000001  |
| C | 7.522550000000000  | 14.540160000000000 | 7.786050000000000  |
| C | 12.395460000000000 | 5.733260000000000  | 8.602430000000000  |
| C | 14.141810000000000 | 8.070840000000000  | 9.484750000000000  |
| C | 9.586169999999999  | 5.594730000000000  | 7.242160000000000  |
| C | 12.652040000000000 | 16.371910000000000 | 6.921500000000000  |
| C | 7.837880000000000  | 7.722070000000000  | 5.916200000000000  |
| C | 16.387660000000000 | 12.316420000000001 | 6.526730000000000  |
| C | 16.371390000000002 | 9.607170000000000  | 8.081569999999999  |
| C | 14.147550000000001 | 14.118230000000001 | 5.489110000000000  |

|    |                    |                    |                   |
|----|--------------------|--------------------|-------------------|
| C  | 5.566160000000000  | 12.287269999999999 | 8.286250000000001 |
| C  | 5.615290000000000  | 9.389010000000001  | 7.176790000000000 |
| Fe | 10.971080000000001 | 11.050530000000000 | 7.414680000000000 |
| N  | 10.981859999999999 | 12.995550000000000 | 7.267360000000000 |
| N  | 10.982519999999999 | 9.099320000000001  | 7.593820000000000 |
| N  | 12.931469999999999 | 11.044879999999999 | 7.426320000000000 |
| N  | 9.016830000000001  | 11.036170000000000 | 7.381520000000000 |

Transition Metal: Fe; Functional Group: CH3; Adsorbate: O

|   |                    |                    |                    |
|---|--------------------|--------------------|--------------------|
| H | 9.260560000000000  | 16.156970000000001 | 9.152450000000000  |
| H | 10.687300000000000 | 17.076440000000002 | 8.666029999999999  |
| H | 9.270460000000000  | 17.037150000000000 | 7.610810000000000  |
| H | 6.630710000000000  | 14.208760000000000 | 7.404130000000000  |
| H | 7.305300000000000  | 14.776479999999999 | 8.940860000000001  |
| H | 7.878830000000000  | 15.431929999999999 | 7.397540000000000  |
| H | 12.365670000000000 | 5.748270000000000  | 9.785420000000000  |
| H | 11.900210000000000 | 4.829810000000000  | 8.345850000000000  |
| H | 13.388970000000000 | 5.776240000000000  | 8.339470000000000  |
| H | 14.702489999999999 | 8.843830000000001  | 10.084450000000000 |
| H | 13.436410000000000 | 7.631760000000000  | 10.252370000000001 |
| H | 14.755010000000000 | 7.372900000000000  | 9.098430000000000  |
| H | 9.522240000000000  | 5.331080000000000  | 6.162900000000000  |
| H | 10.017690000000000 | 4.758570000000000  | 7.764130000000000  |
| H | 8.538489999999999  | 5.705500000000000  | 7.587790000000000  |
| H | 12.278750000000000 | 17.221650000000000 | 7.431810000000000  |
| H | 13.674500000000000 | 16.145700000000001 | 7.241490000000000  |
| H | 12.745450000000000 | 16.663370000000000 | 5.823820000000000  |
| H | 8.495820000000000  | 7.108540000000000  | 5.189170000000000  |
| H | 7.191710000000000  | 7.064520000000000  | 6.389680000000000  |
| H | 7.222320000000000  | 8.327120000000001  | 5.144700000000000  |
| H | 16.391089999999998 | 13.373279999999999 | 6.864010000000000  |
| H | 17.290019999999998 | 11.855309999999999 | 6.918730000000000  |
| H | 16.481660000000002 | 12.348640000000000 | 5.421850000000000  |
| H | 16.557099999999998 | 9.748329999999999  | 9.245730000000000  |
| H | 16.250979999999998 | 8.590840000000000  | 7.939500000000000  |
| H | 17.242159999999998 | 10.018689999999999 | 7.636730000000000  |
| H | 14.891900000000000 | 14.725880000000000 | 5.875060000000000  |
| H | 14.650290000000000 | 13.439299999999999 | 4.679980000000000  |
| H | 13.480990000000000 | 14.753520000000000 | 4.800340000000000  |
| H | 4.923680000000000  | 11.479189999999999 | 8.764450000000000  |
| H | 5.878950000000000  | 12.896509999999999 | 9.204230000000001  |
| H | 5.016870000000000  | 12.850199999999999 | 7.653570000000000  |
| H | 5.797590000000000  | 8.411470000000000  | 7.621610000000000  |
| H | 4.749790000000000  | 9.841010000000001  | 7.622880000000000  |
| H | 5.345580000000000  | 9.189290000000000  | 6.095030000000000  |
| C | 10.480520000000000 | 15.203040000000000 | 7.625230000000000  |
| C | 9.964580000000000  | 13.834339999999999 | 7.609470000000000  |
| C | 8.617839999999999  | 13.430000000000000 | 7.789600000000000  |
| C | 11.571930000000000 | 6.952780000000000  | 8.143620000000000  |
| C | 11.970039999999999 | 8.360320000000000  | 8.130430000000000  |
| C | 13.234740000000000 | 8.878430000000000  | 8.501910000000001  |
| C | 10.367380000000001 | 6.869260000000000  | 7.459790000000000  |
| C | 9.977359999999999  | 8.235849999999999  | 7.129760000000000  |
| C | 11.739810000000000 | 15.167350000000001 | 7.045420000000000  |
| C | 8.710010000000000  | 8.661700000000000  | 6.667870000000000  |
| C | 15.146010000000000 | 11.596399999999999 | 6.973520000000000  |
| C | 12.048930000000000 | 13.766760000000000 | 6.801100000000000  |
| C | 13.755620000000000 | 12.003610000000000 | 6.799080000000000  |
| C | 15.128470000000000 | 10.440849999999999 | 7.741860000000000  |
| C | 13.724330000000000 | 10.085140000000001 | 7.941020000000000  |
| C | 13.293290000000001 | 13.259219999999999 | 6.344310000000000  |
| C | 6.813840000000000  | 11.589140000000000 | 7.738740000000000  |
| C | 8.189900000000000  | 12.083520000000000 | 7.676940000000000  |
| C | 6.827090000000000  | 10.293390000000000 | 7.245780000000000  |
| C | 8.221819999999999  | 9.947229999999999  | 7.014390000000000  |
| C | 9.886150000000001  | 16.422400000000000 | 8.290609999999999  |
| C | 7.556000000000000  | 14.515850000000000 | 7.898510000000000  |
| C | 12.344170000000000 | 5.775660000000000  | 8.683310000000001  |
| C | 14.081980000000000 | 8.135429999999999  | 9.522660000000000  |
| C | 9.574370000000000  | 5.608550000000000  | 7.228630000000000  |
| C | 12.656580000000000 | 16.351189999999999 | 6.877760000000000  |
| C | 7.854050000000000  | 7.736440000000000  | 5.820240000000000  |
| C | 16.382829999999998 | 12.327680000000001 | 6.519310000000000  |
| C | 16.348440000000000 | 9.662490000000000  | 8.166110000000000  |
| C | 14.129730000000000 | 14.094460000000000 | 5.390420000000000  |



|    |                    |                    |                   |
|----|--------------------|--------------------|-------------------|
| C  | 5.605110000000000  | 12.244520000000000 | 8.364950000000000 |
| C  | 5.627530000000000  | 9.387729999999999  | 7.142200000000000 |
| Fe | 10.970280000000001 | 11.025340000000000 | 7.041090000000000 |
| O  | 10.995880000000000 | 10.873070000000000 | 5.396860000000000 |
| N  | 10.990660000000000 | 12.979110000000000 | 7.215150000000000 |
| N  | 10.969609999999999 | 9.108750000000001  | 7.531600000000000 |
| N  | 12.923400000000001 | 11.055080000000000 | 7.365370000000000 |
| N  | 9.027030000000000  | 11.024600000000000 | 7.337240000000000 |

Transition Metal: Fe; Functional Group: CH3; Adsorbate: OH

|   |                    |                    |                    |
|---|--------------------|--------------------|--------------------|
| H | 10.357730000000000 | 11.353389999999999 | 4.604840000000000  |
| H | 9.244090000000000  | 16.154060000000001 | 9.151009999999999  |
| H | 10.678870000000000 | 17.079809999999998 | 8.699540000000001  |
| H | 9.279180000000000  | 17.050750000000001 | 7.619470000000000  |
| H | 6.632230000000000  | 14.219970000000000 | 7.350560000000000  |
| H | 7.294220000000000  | 14.806039999999999 | 8.886120000000000  |
| H | 7.881090000000000  | 15.444310000000000 | 7.341190000000000  |
| H | 12.361780000000000 | 5.752120000000000  | 9.783820000000000  |
| H | 11.906980000000001 | 4.831650000000000  | 8.342060000000000  |
| H | 13.393120000000000 | 5.783530000000000  | 8.343890000000000  |
| H | 14.691780000000000 | 8.852119999999999  | 10.090949999999999 |
| H | 13.427190000000000 | 7.638630000000000  | 10.250280000000000 |
| H | 14.754860000000001 | 7.380080000000000  | 9.105470000000000  |
| H | 9.504980000000000  | 5.342720000000000  | 6.160660000000000  |
| H | 10.035209999999999 | 4.755940000000000  | 7.745980000000000  |
| H | 8.547120000000000  | 5.695810000000000  | 7.608230000000000  |
| H | 12.316900000000000 | 17.221209999999999 | 7.533120000000000  |
| H | 13.703049999999999 | 16.138259999999999 | 7.318930000000000  |
| H | 12.788850000000000 | 16.708510000000000 | 5.911590000000000  |
| H | 8.467570000000000  | 7.110270000000000  | 5.194790000000000  |
| H | 7.197480000000000  | 7.045600000000000  | 6.429960000000000  |
| H | 7.178100000000000  | 8.312150000000001  | 5.189860000000000  |
| H | 16.416180000000001 | 13.383360000000000 | 6.930810000000000  |
| H | 17.306349999999998 | 11.859220000000001 | 6.957870000000000  |
| H | 16.507220000000000 | 12.388920000000001 | 5.468040000000000  |
| H | 16.556870000000000 | 9.755080000000000  | 9.267609999999999  |
| H | 16.253940000000000 | 8.596069999999999  | 7.962320000000000  |
| H | 17.250630000000001 | 10.020780000000000 | 7.661130000000000  |
| H | 14.940020000000001 | 14.739210000000000 | 5.946420000000000  |
| H | 14.686199999999999 | 13.487000000000000 | 4.717320000000000  |
| H | 13.536160000000001 | 14.814439999999999 | 4.865610000000000  |
| H | 4.947090000000000  | 11.499409999999999 | 8.803310000000000  |
| H | 5.906590000000000  | 12.925970000000000 | 9.203010000000001  |
| H | 5.017100000000000  | 12.853830000000000 | 7.669200000000000  |
| H | 5.825930000000000  | 8.407500000000001  | 7.681450000000000  |
| H | 4.767290000000000  | 9.829070000000000  | 7.710290000000000  |
| H | 5.319320000000000  | 9.175300000000000  | 6.166600000000000  |
| C | 10.489680000000000 | 15.217300000000000 | 7.634570000000000  |
| C | 9.968420000000000  | 13.851430000000001 | 7.586610000000000  |
| C | 8.618560000000000  | 13.446910000000001 | 7.757180000000000  |
| C | 11.574149999999999 | 6.954770000000000  | 8.139060000000001  |
| C | 11.973020000000000 | 8.362579999999999  | 8.118840000000001  |
| C | 13.236850000000000 | 8.882830000000000  | 8.496480000000000  |
| C | 10.368050000000000 | 6.870050000000000  | 7.456750000000000  |
| C | 9.979770000000000  | 8.236549999999999  | 7.120670000000000  |
| C | 11.761609999999999 | 15.184559999999999 | 7.080200000000000  |
| C | 8.705320000000000  | 8.660560000000000  | 6.672050000000000  |
| C | 15.161890000000000 | 11.610849999999999 | 6.998040000000000  |
| C | 12.065780000000000 | 13.787530000000000 | 6.811510000000000  |
| C | 13.772610000000000 | 12.016560000000000 | 6.808880000000000  |
| C | 15.137340000000000 | 10.448610000000000 | 7.757520000000000  |
| C | 13.731700000000000 | 10.090470000000000 | 7.938300000000000  |
| C | 13.317930000000000 | 13.282270000000000 | 6.369320000000000  |
| C | 6.819110000000000  | 11.598810000000000 | 7.741740000000000  |
| C | 8.191030000000000  | 12.098120000000000 | 7.648400000000000  |
| C | 6.828490000000000  | 10.294330000000000 | 7.267010000000000  |
| C | 8.219049999999999  | 9.952349999999999  | 7.007920000000000  |
| C | 9.884490000000000  | 16.429559999999999 | 8.303150000000000  |
| C | 7.554190000000000  | 14.532880000000000 | 7.849320000000000  |
| C | 12.346399999999999 | 5.779000000000000  | 8.681520000000001  |
| C | 14.077109999999999 | 8.142280000000000  | 9.524380000000001  |
| C | 9.576530000000000  | 5.608370000000000  | 7.227980000000000  |
| C | 12.689850000000000 | 16.364570000000001 | 6.954780000000000  |
| C | 7.835950000000000  | 7.728280000000000  | 5.845940000000000  |
| C | 16.403919999999999 | 12.345100000000000 | 6.564160000000000  |
| C | 16.353510000000000 | 9.667800000000000  | 8.187020000000000  |

|    |                    |                    |                   |
|----|--------------------|--------------------|-------------------|
| C  | 14.171180000000000 | 14.130820000000000 | 5.442600000000000 |
| C  | 5.619440000000000  | 12.259890000000000 | 8.379170000000000 |
| C  | 5.632440000000000  | 9.380080000000000  | 7.203740000000000 |
| Fe | 10.980840000000001 | 11.029660000000000 | 6.979380000000000 |
| O  | 11.036420000000000 | 10.843310000000001 | 5.083430000000000 |
| N  | 10.991370000000000 | 13.001550000000000 | 7.180600000000000 |
| N  | 10.979770000000000 | 9.105200000000000  | 7.508080000000000 |
| N  | 12.938879999999999 | 11.056670000000000 | 7.350470000000000 |
| N  | 9.022340000000000  | 11.042020000000001 | 7.289900000000000 |

Transition Metal: Fe; Functional Group: CH3; Adsorbate: OOH

|   |                    |                    |                    |
|---|--------------------|--------------------|--------------------|
| H | 9.240610000000000  | 16.166740000000001 | 9.322070000000000  |
| H | 10.667579999999999 | 17.086480000000002 | 8.835860000000000  |
| H | 9.250430000000000  | 17.047249999999998 | 7.780540000000000  |
| H | 6.610330000000000  | 14.218730000000001 | 7.573560000000000  |
| H | 7.285080000000000  | 14.786740000000000 | 9.110820000000000  |
| H | 7.858700000000000  | 15.442270000000001 | 7.567050000000000  |
| H | 12.345720000000000 | 5.758330000000000  | 9.955290000000000  |
| H | 11.880269999999999 | 4.839620000000000  | 8.515689999999999  |
| H | 13.369220000000000 | 5.786160000000000  | 8.509250000000000  |
| H | 14.682570000000000 | 8.853669999999999  | 10.254479999999999 |
| H | 13.416539999999999 | 7.641620000000000  | 10.422340000000000 |
| H | 14.735450000000000 | 7.382380000000000  | 9.268079999999999  |
| H | 9.502319999999999  | 5.341190000000000  | 6.332900000000000  |
| H | 9.997809999999999  | 4.768660000000000  | 7.933890000000000  |
| H | 8.518700000000001  | 5.715500000000000  | 7.757470000000000  |
| H | 12.258910000000000 | 17.231349999999999 | 7.601550000000000  |
| H | 13.654529999999999 | 16.155539999999998 | 7.411290000000000  |
| H | 12.725790000000000 | 16.673580000000001 | 5.993680000000000  |
| H | 8.475849999999999  | 7.118450000000000  | 5.358780000000000  |
| H | 7.171710000000000  | 7.074130000000000  | 6.559830000000000  |
| H | 7.202700000000000  | 8.337040000000000  | 5.314480000000000  |
| H | 16.371110000000002 | 13.383160000000000 | 7.033790000000000  |
| H | 17.269839999999999 | 11.865209999999999 | 7.088440000000000  |
| H | 16.461749999999999 | 12.358520000000000 | 5.591750000000000  |
| H | 16.536890000000000 | 9.758310000000000  | 9.415520000000001  |
| H | 16.230930000000001 | 8.600660000000000  | 8.109340000000000  |
| H | 17.222380000000001 | 10.028570000000000 | 7.806490000000000  |
| H | 14.872210000000001 | 14.736060000000000 | 6.044680000000000  |
| H | 14.630730000000000 | 13.449249999999999 | 4.849420000000000  |
| H | 13.461440000000000 | 14.764080000000000 | 4.970050000000000  |
| H | 4.903620000000000  | 11.488920000000000 | 8.934279999999999  |
| H | 5.859190000000000  | 12.906540000000000 | 9.374060000000000  |
| H | 4.996760000000000  | 12.860250000000001 | 7.823150000000000  |
| H | 5.777950000000000  | 8.421590000000000  | 7.791360000000000  |
| H | 4.730150000000000  | 9.850830000000000  | 7.792670000000000  |
| H | 5.325850000000000  | 9.199260000000001  | 6.265040000000000  |
| H | 10.140409999999999 | 12.407800000000000 | 4.607620000000000  |
| C | 10.458370000000000 | 15.211919999999999 | 7.796330000000000  |
| C | 9.948910000000000  | 13.844670000000001 | 7.782700000000000  |
| C | 8.595599999999999  | 13.440510000000000 | 7.961050000000000  |
| C | 11.553699999999999 | 6.962230000000000  | 8.314530000000000  |
| C | 11.943920000000000 | 8.370770000000000  | 8.300509999999999  |
| C | 13.215470000000000 | 8.887460000000001  | 8.673489999999999  |
| C | 10.346460000000000 | 6.879410000000000  | 7.629280000000000  |
| C | 9.961790000000001  | 8.248279999999999  | 7.301610000000000  |
| C | 11.722370000000000 | 15.176810000000000 | 7.214450000000000  |
| C | 8.685359999999999  | 8.670870000000001  | 6.837100000000000  |
| C | 15.125040000000000 | 11.608169999999999 | 7.142220000000000  |
| C | 12.032019999999999 | 13.780189999999999 | 6.971770000000000  |
| C | 13.735900000000001 | 12.009919999999999 | 6.970400000000000  |
| C | 15.107550000000000 | 10.448079999999999 | 7.913460000000000  |
| C | 13.705460000000000 | 10.099830000000001 | 8.110910000000001  |
| C | 13.273569999999999 | 13.273490000000001 | 6.513970000000000  |
| C | 6.794310000000000  | 11.600580000000001 | 7.909730000000000  |
| C | 8.171790000000000  | 12.089380000000000 | 7.849430000000000  |
| C | 6.808030000000000  | 10.300829999999999 | 7.415220000000000  |
| C | 8.201850000000000  | 9.956840000000000  | 7.186600000000000  |
| C | 9.866160000000001  | 16.432530000000000 | 8.460070000000000  |
| C | 7.536150000000000  | 14.525440000000000 | 8.068080000000000  |
| C | 12.324149999999999 | 5.785160000000000  | 8.852570000000000  |
| C | 14.061780000000001 | 8.145700000000000  | 9.692040000000000  |
| C | 9.554449999999999  | 5.618390000000000  | 7.398290000000000  |
| C | 12.636810000000001 | 16.361300000000000 | 7.047250000000000  |
| C | 7.834380000000000  | 7.747210000000000  | 5.990300000000000  |
| C | 16.362860000000001 | 12.337580000000001 | 6.688900000000000  |
| C | 16.328830000000000 | 9.672450000000000  | 8.335380000000001  |

|    |                    |                    |                   |
|----|--------------------|--------------------|-------------------|
| C  | 14.109629999999999 | 14.103490000000001 | 5.560980000000000 |
| C  | 5.585100000000000  | 12.254339999999999 | 8.534310000000000 |
| C  | 5.607150000000000  | 9.397629999999999  | 7.311530000000000 |
| Fe | 10.943510000000000 | 11.047010000000000 | 7.317920000000000 |
| O  | 10.960250000000000 | 10.871549999999999 | 5.315580000000000 |
| O  | 9.905120000000000  | 11.450939999999999 | 4.584180000000000 |
| N  | 10.962350000000001 | 13.001130000000000 | 7.382360000000000 |
| N  | 10.957050000000001 | 9.102919999999999  | 7.703680000000000 |
| N  | 12.915240000000001 | 11.057560000000000 | 7.534690000000000 |
| N  | 8.996670000000000  | 11.038180000000001 | 7.508600000000000 |

Transition Metal: Fe; Functional Group: F; Adsorbate: Clean

|    |                    |                    |                    |
|----|--------------------|--------------------|--------------------|
| Fe | 0.000000000000000  | 0.000123109959374  | -0.002580019433444 |
| C  | 0.683679872212610  | 4.245252960770506  | -0.002919082940330 |
| C  | 1.106408910573854  | 2.865685245995752  | -0.007423271112500 |
| C  | 2.427301220483156  | 2.431656206555730  | -0.005762473317678 |
| C  | -0.683639759064313 | -4.245157425062649 | -0.004568330433163 |
| C  | -1.106315494413138 | -2.865615925830586 | 0.002206723095160  |
| C  | -2.427178517882314 | -2.431553313174732 | 0.005109200301412  |
| C  | 0.683639759064314  | -4.245157425062649 | -0.004568330433163 |
| C  | 1.106315494413136  | -2.865615925830586 | 0.002206723095160  |
| C  | -0.683679872212611 | 4.245252960770506  | -0.002919082940330 |
| C  | 2.427178517882312  | -2.431553313174732 | 0.005109200301412  |
| C  | -4.238043240889402 | 0.686029936247918  | -0.002644344626411 |
| C  | -1.106408910573855 | 2.865685245995752  | -0.007423271112500 |
| C  | -2.864212150937202 | 1.107938392223490  | -0.006090915915344 |
| C  | -4.237939382984933 | -0.686158533725099 | 0.007992382694462  |
| C  | -2.864044709777488 | -1.107795411114086 | 0.008657446451440  |
| C  | -2.427301220483159 | 2.431656206555730  | -0.005762473317678 |
| C  | 4.238043240889412  | 0.686029936247918  | -0.002644344626411 |
| C  | 2.864212150937202  | 1.107938392223490  | -0.006090915915344 |
| C  | 4.237939382984928  | -0.686158533725099 | 0.007992382694462  |
| C  | 2.864044709777496  | -1.107795411114086 | 0.008657446451440  |
| N  | 0.000000000000000  | 2.015627804930148  | -0.016294814291534 |
| N  | 0.000000000000000  | -2.015453963299624 | 0.010796789265168  |
| N  | -2.015964192187056 | 0.000133941556010  | 0.000216945817922  |
| N  | 2.015964192187052  | 0.000133941556010  | 0.000216945817922  |
| F  | 5.325900237851070  | -1.476051919859852 | 0.009821522132824  |
| F  | -5.326345609666719 | 1.475409227581650  | -0.004133486489607 |
| F  | -5.325900237851073 | -1.476051919859852 | 0.009821522132824  |
| F  | -1.478820758462906 | 5.330023154003401  | 0.000531053817172  |
| F  | 1.478820758462910  | 5.330023154003401  | 0.000531053817172  |
| F  | 5.326345609666716  | 1.475409227581650  | -0.004133486489607 |
| F  | -1.478708432690162 | -5.329877384430793 | -0.009659583770613 |
| F  | 1.478708432690162  | -5.329877384430793 | -0.009659583770613 |
| F  | -3.392548980949080 | 3.394147059149508  | -0.002376414926622 |
| F  | 3.392548980949078  | 3.394147059149508  | -0.002376414926622 |
| F  | -3.392541455978524 | -3.394004686680990 | 0.001926651451522  |
| F  | 3.392541455978520  | -3.394004686680990 | 0.001926651451522  |

Transition Metal: Fe; Functional Group: F; Adsorbate: O

|    |                    |                    |                    |
|----|--------------------|--------------------|--------------------|
| Fe | 0.000000000000000  | -0.000495238659330 | 0.265568089457172  |
| C  | 0.684301425874002  | 4.240521114793318  | -0.001263342698074 |
| C  | 1.105147726439574  | 2.861669438200620  | -0.005865209385704 |
| C  | 2.427061475598056  | 2.425760744112824  | 0.006394797450222  |
| C  | -0.684265857977255 | -4.242379264669061 | -0.002225424685591 |
| C  | -1.105151487577231 | -2.863530581255290 | -0.004755825334322 |
| C  | -2.427098929294576 | -2.427764937694324 | 0.005339225803256  |
| C  | 0.684265857977254  | -4.242379264669061 | -0.002225424685591 |
| C  | 1.105151487577234  | -2.863530581255290 | -0.004755825334322 |
| C  | -0.684301425874001 | 4.240521114793318  | -0.001263342698074 |
| C  | 2.427098929294574  | -2.427764937694324 | 0.005339225803256  |
| C  | -4.242613416133596 | 0.683329199903514  | 0.007107937348008  |
| C  | -1.105147726439576 | 2.861669438200620  | -0.005865209385704 |
| C  | -2.863689958089822 | 1.104036035777222  | -0.000228757201366 |
| C  | -4.242584986150529 | -0.685313162573173 | 0.006673216697974  |
| C  | -2.863632232449852 | -1.106042875442178 | -0.000799162315348 |
| C  | -2.427061475598059 | 2.425760744112824  | 0.006394797450222  |
| C  | 4.242613416133584  | 0.683329199903514  | 0.007107937348008  |
| C  | 2.863689958089824  | 1.104036035777222  | -0.000228757201366 |
| C  | 4.242584986150524  | -0.685313162573173 | 0.006673216697974  |
| C  | 2.863632232449850  | -1.106042875442178 | -0.000799162315348 |
| N  | 0.000000000000000  | 2.017099996527564  | -0.026460252350950 |
| N  | 0.000000000000000  | -2.018868425210453 | -0.023530291351220 |
| N  | -2.019153377099329 | -0.000966196760556 | -0.021665521582220 |
| N  | 2.019153377099336  | -0.000966196760556 | -0.021665521582220 |
| F  | 5.326104551078362  | -1.480181129930234 | -0.000201322892458 |
| F  | -5.326195320026947 | 1.478135569448382  | 0.000344664316656  |
| F  | -5.326104551078366 | -1.480181129930234 | -0.000201322892458 |
| F  | -1.479043055321029 | 5.324071023321548  | -0.006678661137954 |
| F  | 1.479043055321030  | 5.324071023321548  | -0.006678661137954 |
| F  | 5.326195320026956  | 1.478135569448382  | 0.000344664316656  |
| F  | -1.479076284196964 | -5.325913296219635 | -0.010123375244685 |
| F  | 1.479076284196960  | -5.325913296219635 | -0.010123375244685 |
| F  | -3.388680897700219 | 3.387960500748560  | 0.026218590497046  |
| F  | 3.388680897700212  | 3.387960500748560  | 0.026218590497046  |
| F  | -3.388707950634842 | -3.390048748492521 | 0.021614524398200  |
| F  | 3.388707950634844  | -3.390048748492521 | 0.021614524398200  |
| O  | 0.000000000000000  | 0.001956800804408  | 1.913519746177104  |

Transition Metal: Fe; Functional Group: F; Adsorbate: OH

|    |                    |                    |                    |
|----|--------------------|--------------------|--------------------|
| Fe | 0.000000000000000  | 0.003354935115352  | 0.506038461627240  |
| C  | 0.687255522885386  | 4.274584085543906  | -0.043624645079084 |
| C  | 1.114623649422558  | 2.897320978571020  | -0.022169470916624 |
| C  | 2.439984023549196  | 2.439001715179438  | -0.025908631471926 |
| C  | -0.687043190938695 | -4.269572954294986 | -0.032398533080624 |
| C  | -1.112512092417937 | -2.890897733971848 | -0.017930745695958 |
| C  | -2.438568757969868 | -2.432452547150966 | -0.016792936825862 |
| C  | 0.687043190938704  | -4.269572954294986 | -0.032398533080624 |
| C  | 1.112512092417940  | -2.890897733971848 | -0.017930745695958 |
| C  | -0.687255522885387 | 4.274584085543906  | -0.043624645079084 |
| C  | 2.438568757969868  | -2.432452547150966 | -0.016792936825862 |
| C  | -4.281277702272003 | 0.689261128009534  | -0.040515037844660 |
| C  | -1.114623649422562 | 2.897320978571020  | -0.022169470916624 |
| C  | -2.901381615331982 | 1.114822625291122  | -0.030448631867220 |
| C  | -4.280683367845901 | -0.683879389009931 | -0.037102936906340 |
| C  | -2.900509755390939 | -1.108727213568987 | -0.025193104182442 |
| C  | -2.439984023549211 | 2.439001715179438  | -0.025908631471926 |
| C  | 4.281277702272000  | 0.689261128009534  | -0.040515037844660 |
| C  | 2.901381615331978  | 1.114822625291122  | -0.030448631867220 |
| C  | 4.280683367845912  | -0.683879389009931 | -0.037102936906340 |
| C  | 2.900509755390932  | -1.108727213568987 | -0.025193104182442 |
| N  | 0.000000000000000  | 2.068397874047196  | -0.002730127839384 |
| N  | 0.000000000000000  | -2.063361739146661 | -0.009127085809504 |
| N  | -2.073847385340898 | 0.003788609856964  | -0.023431409919525 |
| N  | 2.073847385340890  | 0.003788609856964  | -0.023431409919525 |
| F  | 5.369848264430490  | -1.472486101909880 | -0.045442557335886 |
| F  | -5.370767512332943 | 1.477706515839476  | -0.051451121655066 |
| F  | -5.369848264430480 | -1.472486101909880 | -0.045442557335886 |
| F  | -1.472678582343715 | 5.365940793685800  | -0.059722815879198 |
| F  | 1.472678582343710  | 5.365940793685800  | -0.059722815879198 |
| F  | 5.370767512332933  | 1.477706515839476  | -0.051451121655066 |
| F  | -1.473747402544664 | -5.359871691643567 | -0.045486585431564 |
| F  | 1.473747402544670  | -5.359871691643567 | -0.045486585431564 |
| F  | -3.402809729462152 | 3.404968756278160  | -0.031329110941492 |
| F  | 3.402809729462162  | 3.404968756278160  | -0.031329110941492 |
| F  | -3.400389803738587 | -3.398458471011850 | -0.013264211672274 |
| F  | 3.400389803738590  | -3.398458471011850 | -0.013264211672274 |
| H  | 0.000000000000000  | 0.789609978521700  | 2.893398853444820  |
| O  | 0.000000000000000  | -0.022979259924000 | 2.356474871987204  |



Transition Metal: Fe; Functional Group: F; Adsorbate: OOH

|    |                    |                    |                    |
|----|--------------------|--------------------|--------------------|
| Fe | -0.005548248880286 | 0.000376434452414  | 0.241396781265668  |
| C  | 0.685118475501456  | 4.252736871507196  | -0.007568192765902 |
| C  | 1.106634368479508  | 2.873823568214862  | -0.007970323539900 |
| C  | 2.428649123056952  | 2.436756750883114  | -0.001870443289504 |
| C  | -0.688400402888316 | -4.236583769719061 | 0.003622960444594  |
| C  | -1.111080414547502 | -2.859184466549703 | 0.001828839134496  |
| C  | -2.433076800332042 | -2.422362024760560 | 0.005169515457096  |
| C  | 0.680597458406788  | -4.234070113502176 | 0.007177332271860  |
| C  | 1.101164632225522  | -2.854707762802885 | 0.012366460512320  |
| C  | -0.683173711690010 | 4.250584233939098  | -0.004191195588130 |
| C  | 2.423636523628382  | -2.416386137852768 | 0.023314906971878  |
| C  | -4.243316752139192 | 0.689432313400200  | -0.002695355644221 |
| C  | -1.102658994569509 | 2.870184449370782  | 0.001647056109826  |
| C  | -2.862260562418168 | 1.108395065196354  | 0.005191112896214  |
| C  | -4.246806774860012 | -0.678633967371688 | -0.006610316112102 |
| C  | -2.868787170830899 | -1.100962353037144 | -0.003831748397733 |
| C  | -2.424057706580921 | 2.430641634261960  | 0.013713389184454  |
| C  | 4.244116401209838  | 0.692691117946994  | -0.007434468994703 |
| C  | 2.864920019174600  | 1.114561916726234  | -0.003643665909480 |
| C  | 4.242661619841844  | -0.675321368085079 | -0.000207643722991 |
| C  | 2.862622961145638  | -1.095422156926645 | 0.010999118862584  |
| N  | 0.002719040401652  | 2.025821275910640  | -0.012788178563436 |
| N  | -0.006121714902636 | -2.010677839849592 | -0.002525440042534 |
| N  | -2.019196772643276 | 0.001863519082980  | -0.006620223717448 |
| N  | 2.016835664045270  | 0.009927812208086  | -0.002369701166318 |
| F  | 5.326460168184458  | -1.471225528125132 | -0.010853925191949 |
| F  | -5.326024212913937 | 1.486141768895168  | -0.014119207377757 |
| F  | -5.332844581176255 | -1.471954329391703 | -0.023398315271660 |
| F  | -1.478560286783942 | 5.334552665306882  | -0.010725738143306 |
| F  | 1.478640408289090  | 5.338842083932724  | -0.018552519066522 |
| F  | 5.329622438913924  | 1.486589797808192  | -0.029279995225618 |
| F  | -1.480649162529630 | -5.323538852378515 | -0.008959789676229 |
| F  | 1.476114345508456  | -5.318114640184262 | -0.001095553774564 |
| F  | -3.387322068965432 | 3.392762655647598  | 0.022661964092740  |
| F  | 3.391875579376968  | 3.399318765959850  | 0.003453038512188  |
| F  | -3.395241208048347 | -3.385784136110473 | 0.014152378445312  |
| F  | 3.385636459138420  | -3.381090629713274 | 0.035351500621022  |
| H  | -0.277090459905413 | -1.419486604134043 | 3.151014230084360  |
| O  | 0.081499500922084  | 0.073283780217126  | 2.006994624440590  |
| O  | -0.887987062936098 | -0.761220204088591 | 2.752529232214606  |

Transition Metal: Fe; Functional Group: H; Adsorbate: Clean

|    |                    |                    |                    |
|----|--------------------|--------------------|--------------------|
| Fe | 0.000000000000000  | 0.000022421415038  | 0.001808977764758  |
| C  | 0.687701865551834  | 4.224170729938630  | -0.008510001029087 |
| C  | 1.106042782843436  | 2.848222181367638  | -0.004667796625029 |
| C  | 2.438423332854996  | 2.429032411139042  | -0.001625269225524 |
| C  | -0.687700415068576 | -4.224109784079978 | -0.005582579908765 |
| C  | -1.106036603177717 | -2.848186379090599 | -0.001444186968751 |
| C  | -2.438414158787886 | -2.429009150551007 | 0.000833598610912  |
| C  | 0.687700415068578  | -4.224109784079978 | -0.005582579908765 |
| C  | 1.106036603177716  | -2.848186379090599 | -0.001444186968751 |
| C  | -0.687701865551841 | 4.224170729938630  | -0.008510001029087 |
| C  | 2.438414158787886  | -2.429009150551007 | 0.000833598610912  |
| C  | -4.241216858626583 | 0.682641403462676  | 0.004699336975040  |
| C  | -1.106042782843438 | 2.848222181367638  | -0.004667796625029 |
| C  | -2.852857082536847 | 1.103600628009912  | 0.002157327076390  |
| C  | -4.241268455716860 | -0.682696812478376 | 0.005300979810266  |
| C  | -2.852884489019353 | -1.103602399693827 | 0.003290786131044  |
| C  | -2.438423332854999 | 2.429032411139042  | -0.001625269225524 |
| C  | 4.241216858626442  | 0.682641403462676  | 0.004699336975040  |
| C  | 2.852857082536850  | 1.103600628009912  | 0.002157327076390  |
| C  | 4.241268455716858  | -0.682696812478376 | 0.005300979810266  |
| C  | 2.852884489019352  | -1.103602399693827 | 0.003290786131044  |
| N  | 0.000000000000000  | 2.001430202648554  | -0.002836913452640 |
| N  | 0.000000000000000  | -2.001369763964618 | 0.000836729954386  |
| N  | -2.002920328973378 | -0.000008201004700 | 0.002240828092868  |
| N  | 2.002920328973382  | -0.000008201004700 | 0.002240828092868  |
| H  | 5.091633705013198  | -1.362427131744109 | 0.006273129022024  |
| H  | -5.091458621043889 | 1.362467603201598  | 0.005559286134628  |
| H  | -5.091633705013203 | -1.362427131744109 | 0.006273129022024  |
| H  | -1.365641718727485 | 5.075908052656520  | -0.010460390036201 |
| H  | 1.365641718727484  | 5.075908052656520  | -0.010460390036201 |
| H  | 5.091458621043891  | 1.362467603201598  | 0.005559286134628  |
| H  | -1.365561209112556 | -5.075907135198197 | -0.008289105489663 |
| H  | 1.365561209112556  | -5.075907135198197 | -0.008289105489663 |
| H  | -3.209376905001658 | 3.202224822814866  | -0.003040905934011 |
| H  | 3.209376905001660  | 3.202224822814866  | -0.003040905934011 |
| H  | -3.209414002470574 | -3.202152268799527 | 0.000205566230288  |
| H  | 3.209414002470572  | -3.202152268799527 | 0.000205566230288  |

Transition Metal: Fe; Functional Group: H; Adsorbate: O

|    |                    |                    |                    |
|----|--------------------|--------------------|--------------------|
| Fe | 0.000000000000000  | -0.000911366045912 | 0.288871584182434  |
| C  | 0.684406648063414  | 4.230570172806570  | -0.015708175650577 |
| C  | 1.102465042109496  | 2.846216486921408  | 0.006953808294748  |
| C  | 2.430724969462494  | 2.429645803203446  | 0.014911644928896  |
| C  | -0.684358284129651 | -4.232462240477874 | -0.016326101658436 |
| C  | -1.102511327980636 | -2.848151678738297 | 0.004881258409054  |
| C  | -2.430820904855327 | -2.431543876554286 | 0.014682393924810  |
| C  | 0.684358284129652  | -4.232462240477874 | -0.016326101658436 |
| C  | 1.102511327980638  | -2.848151678738297 | 0.004881258409054  |
| C  | -0.684406648063419 | 4.230570172806570  | -0.015708175650577 |
| C  | 2.430820904855326  | -2.431543876554286 | 0.014682393924810  |
| C  | -4.231897638020394 | 0.683636174863102  | -0.003259128967482 |
| C  | -1.102465042109490 | 2.846216486921408  | 0.006953808294748  |
| C  | -2.847466595373415 | 1.101477999274600  | 0.012525849289668  |
| C  | -4.232014489232196 | -0.685037600118218 | -0.002616518271619 |
| C  | -2.847577125141534 | -1.103286781897960 | 0.012906764422388  |
| C  | -2.430724969462496 | 2.429645803203446  | 0.014911644928896  |
| C  | 4.231897638020386  | 0.683636174863102  | -0.003259128967482 |
| C  | 2.847466595373412  | 1.101477999274600  | 0.012525849289668  |
| C  | 4.232014489232188  | -0.685037600118218 | -0.002616518271619 |
| C  | 2.847577125141532  | -1.103286781897960 | 0.012906764422388  |
| N  | 0.000000000000000  | 2.004426908109340  | 0.007344979248982  |
| N  | 0.000000000000000  | -2.006321820911129 | 0.004267956067052  |
| N  | -2.005706575485039 | -0.000885768115582 | 0.009780559242666  |
| N  | 2.005706575485042  | -0.000885768115582 | 0.009780559242666  |
| H  | 5.081729021588184  | -1.364650464758267 | -0.017631817480869 |
| H  | -5.081187243058388 | 1.363769250072476  | -0.019455238236404 |
| H  | -5.081729021588185 | -1.364650464758267 | -0.017631817480869 |
| H  | -1.364351961014879 | 5.079951060425206  | -0.034962234179588 |
| H  | 1.364351961014878  | 5.079951060425206  | -0.034962234179588 |
| H  | 5.081187243058394  | 1.363769250072476  | -0.019455238236404 |
| H  | -1.364060627651646 | -5.082011661588473 | -0.032875701413371 |
| H  | 1.364060627651652  | -5.082011661588473 | -0.032875701413371 |
| H  | -3.202349270287282 | 3.201567330286906  | 0.015226125457988  |
| H  | 3.202349270287276  | 3.201567330286906  | 0.015226125457988  |
| H  | -3.202467899609466 | -3.203439584066704 | 0.016596883493660  |
| H  | 3.202467899609466  | -3.203439584066704 | 0.016596883493660  |
| O  | 0.000000000000000  | -0.001542964228268 | 1.937124737289918  |

Transition Metal: Fe; Functional Group: H; Adsorbate: OH

|    |                    |                    |                    |
|----|--------------------|--------------------|--------------------|
| Fe | 0.000000000000000  | 0.001399324505126  | 0.326340058654484  |
| C  | 0.685640339273152  | 4.238600160028914  | -0.005664785047288 |
| C  | 1.105211880752088  | 2.855908428387056  | 0.019967831746386  |
| C  | 2.435279770209408  | 2.436161134454228  | -0.000733894780640 |
| C  | -0.685129307897551 | -4.231947643191333 | 0.007035703701612  |
| C  | -1.103589855642635 | -2.847742135040331 | 0.021163910002354  |
| C  | -2.434126088246614 | -2.429469543934736 | 0.006389651228648  |
| C  | 0.685129307897550  | -4.231947643191333 | 0.007035703701612  |
| C  | 1.103589855642638  | -2.847742135040331 | 0.021163910002354  |
| C  | -0.685640339273153 | 4.238600160028914  | -0.005664785047288 |
| C  | 2.434126088246612  | -2.429469543934736 | 0.006389651228648  |
| C  | -4.239340971958436 | 0.687349442152554  | -0.062595250731814 |
| C  | -1.105211880752087 | 2.855908428387056  | 0.019967831746386  |
| C  | -2.854301417516137 | 1.106065882849840  | -0.017190020457363 |
| C  | -4.238980781444335 | -0.682082142030922 | -0.058886158352948 |
| C  | -2.853980502986463 | -1.100196955780280 | -0.012426795086881 |
| C  | -2.435279770209402 | 2.436161134454228  | -0.000733894780640 |
| C  | 4.239340971958428  | 0.687349442152554  | -0.062595250731814 |
| C  | 2.854301417516132  | 1.106065882849840  | -0.017190020457363 |
| C  | 4.238980781444329  | -0.682082142030922 | -0.058886158352948 |
| C  | 2.853980502986468  | -1.100196955780280 | -0.012426795086881 |
| N  | 0.000000000000000  | 2.017712207556874  | 0.042551422046156  |
| N  | 0.000000000000000  | -2.011099074855697 | 0.030285831131300  |
| N  | -2.017961008089003 | 0.003244512260662  | 0.007095959106962  |
| N  | 2.017961008088858  | 0.003244512260662  | 0.007095959106962  |
| H  | 5.089501337015908  | -1.360686890751118 | -0.087492375743189 |
| H  | -5.089845748708131 | 1.365721005676806  | -0.094495080698422 |
| H  | -5.089501337015914 | -1.360686890751118 | -0.087492375743189 |
| H  | -1.363347006509578 | 5.090052125964318  | -0.029389210551812 |
| H  | 1.363347006509586  | 5.090052125964318  | -0.029389210551812 |
| H  | 5.089845748708130  | 1.365721005676806  | -0.094495080698422 |
| H  | -1.363256721255318 | -5.083181702863111 | -0.006197142293942 |
| H  | 1.363256721255330  | -5.083181702863111 | -0.006197142293942 |
| H  | -3.206548859986519 | 3.208349786805902  | -0.022608626628256 |
| H  | 3.206548859986512  | 3.208349786805902  | -0.022608626628256 |
| H  | -3.205058722784408 | -3.202366950689139 | -0.005083889860802 |
| H  | 3.205058722784408  | -3.202366950689139 | -0.005083889860802 |
| H  | 0.000000000000000  | 0.810028397974902  | 2.682085326066084  |
| O  | 0.000000000000000  | -0.048477883779372 | 2.220587710996204  |

Transition Metal: Fe; Functional Group: H; Adsorbate: OOH

|    |                    |                    |                    |
|----|--------------------|--------------------|--------------------|
| Fe | -0.036684414143259 | 0.066844509718350  | 0.268892852546744  |
| C  | 0.663384621010036  | 4.295593148517736  | -0.124679496464246 |
| C  | 1.080236816660712  | 2.910543180083192  | -0.084534745199804 |
| C  | 2.407432660771766  | 2.489150968373642  | -0.101379702814292 |
| C  | -0.721322542038816 | -4.169743276457920 | 0.040571328418448  |
| C  | -1.139161540260041 | -2.786227714844390 | 0.019826955220530  |
| C  | -2.465396285392835 | -2.365613350425683 | -0.038141592989558 |
| C  | 0.645899097641916  | -4.168824974038348 | 0.127984880468940  |
| C  | 1.064548018552062  | -2.784518291587862 | 0.149265696481680  |
| C  | -0.703951694027030 | 4.297586439457506  | -0.062377463480917 |
| C  | 2.393294027390642  | -2.365156933971075 | 0.192087956276898  |
| C  | -4.255885153928700 | 0.754644726496858  | -0.021310028658206 |
| C  | -1.122714355449659 | 2.914162387638314  | 0.006020168161668  |
| C  | -2.870458156794598 | 1.168191638170816  | 0.027840280749088  |
| C  | -4.260878724920245 | -0.613344199814801 | -0.066797543539469 |
| C  | -2.878358951541347 | -1.036146080482393 | -0.034721697651742 |
| C  | -2.450598330239611 | 2.496653562827146  | 0.046473907833128  |
| C  | 4.205021609076534  | 0.738576250045084  | -0.026290587095568 |
| C  | 2.821261220697402  | 1.160503539181040  | -0.037984318212822 |
| C  | 4.200853291513632  | -0.626344672351259 | 0.077168642195262  |
| C  | 2.814837396458926  | -1.039506031310296 | 0.118812811617912  |
| N  | -0.022251503263785 | 2.069732957378982  | -0.013992935290664 |
| N  | -0.037322598032500 | -1.941496869170070 | 0.080583004209498  |
| N  | -2.031157804462904 | 0.063467039655236  | 0.013116337213088  |
| N  | 1.974450001828708  | 0.062892758376230  | 0.040183072577916  |
| H  | 5.050367597045600  | -1.305637940136897 | 0.116622979812576  |
| H  | -5.104084580450159 | 1.436645558442466  | -0.029641520272538 |
| H  | -5.112954105772037 | -1.288262639755107 | -0.119388669353789 |
| H  | -1.382017486754435 | 5.149209519091436  | -0.069779872732340 |
| H  | 1.340769903126104  | 5.144709832887572  | -0.193826446270112 |
| H  | 5.057670345354833  | 1.411704188599628  | -0.090921322538204 |
| H  | -1.397649694888457 | -5.020878467062424 | -0.011844588151662 |
| H  | 1.322971001701462  | -5.020733543681889 | 0.162029011604158  |
| H  | -3.222367842497363 | 3.268952792305844  | 0.058722279551150  |
| H  | 3.181227632237926  | 3.257350644652656  | -0.155629751673492 |
| H  | -3.238915165944661 | -3.135086303391880 | -0.078959575630740 |
| H  | 3.163585572824896  | -3.136786513314778 | 0.249753833920528  |
| H  | -0.284878683970319 | -1.415750629307293 | 3.025670733787766  |
| O  | 0.038641994562734  | 0.194485250805286  | 2.028759795142026  |
| O  | -0.884443193683374 | -0.666122461601091 | 2.818505330230162  |

## Transition Metal: Fe; Functional Group: NH2; Adsorbate: Clean

|    |                    |                    |                    |
|----|--------------------|--------------------|--------------------|
| Fe | 0.037635785257942  | -0.027279931783827 | -0.059641823144897 |
| C  | 0.815170826750764  | 4.124508493085449  | -0.580478350385636 |
| C  | 1.191040852233744  | 2.731588655623154  | -0.527166041616809 |
| C  | 2.513848446162756  | 2.234993107128700  | -0.648107649144482 |
| C  | -0.716721316414272 | -4.185223525346796 | -0.469627674357369 |
| C  | -1.120772528395161 | -2.801297740500509 | -0.402052574732878 |
| C  | -2.421754154242681 | -2.311536954519610 | -0.587393659315406 |
| C  | 0.629949231816270  | -4.233162631925119 | -0.144986808846269 |
| C  | 1.032285700613476  | -2.879745068399345 | 0.162627100522786  |
| C  | -0.493354905625857 | 4.207900540665082  | -0.128229105415720 |
| C  | 2.318696108398508  | -2.492504538830030 | 0.596054499925808  |
| C  | -4.125217043070082 | 0.723790430557958  | 0.478066766822142  |
| C  | -0.954867724708627 | 2.854579961485228  | 0.083147233908446  |
| C  | -2.750624220134878 | 1.148234527038422  | 0.352040154247714  |
| C  | -4.170238220205968 | -0.619932145381664 | 0.130436244561002  |
| C  | -2.818933965090611 | -1.013696177168658 | -0.178093611527238 |
| C  | -2.293045421855698 | 2.489400693711590  | 0.361195524918716  |
| C  | 4.222874357423674  | 0.579970124973512  | 0.215349669229744  |
| C  | 2.887368964775450  | 0.949680605578428  | -0.209908363151865 |
| C  | 4.144176519339184  | -0.720069682708417 | 0.695269212762040  |
| C  | 2.784245989835198  | -1.165055713060681 | 0.493818145860452  |
| N  | 0.102547615734004  | 1.964480936180748  | -0.125224121064132 |
| N  | -0.037522304753971 | -2.004565952651681 | -0.016599137904294 |
| N  | -1.950842225835490 | 0.0540816663210886 | 0.022869439577200  |
| N  | 2.012968103322104  | -0.114510701384333 | -0.008189274996880 |
| N  | 5.233758549654200  | -1.497097527175978 | 1.231605587334402  |
| N  | -5.249210060974747 | 1.543446455626594  | 0.834650868770416  |
| N  | -5.333665934128881 | -1.419853268655181 | 0.100242815683628  |
| N  | -1.226628224337418 | 5.406837847145788  | 0.027632926977164  |
| N  | 1.665058163317774  | 5.228875751644014  | -0.957287777293590 |
| N  | 5.381438450844734  | 1.363390858543774  | 0.171842356877468  |
| N  | -1.508998215652703 | -5.316261681687070 | -0.803847582404401 |
| N  | 1.401809096030630  | -5.420598851085455 | -0.117729056394364 |
| N  | -3.232619790911311 | 3.519314153747586  | 0.594422435403032  |
| N  | 3.553457549250666  | 3.109190838615770  | -1.068207170594729 |
| N  | -3.425668830848444 | -3.180055789537711 | -1.112144373569418 |
| N  | 3.206755553041426  | -3.527818662936276 | 1.014420141356936  |
| H  | -2.438077186235013 | -5.275303870886267 | -0.377217438824907 |
| H  | -1.053232429251366 | -6.173310357062148 | -0.478042255636154 |
| H  | -3.027208094654267 | -3.884793588501619 | -1.735094237106750 |
| H  | -4.140768739001162 | -2.660761315674542 | -1.624220904457086 |
| H  | -5.405214964800669 | 1.593698265538300  | 1.846640406967698  |
| H  | -6.111918380884580 | 1.219451729722130  | 0.391816988269416  |
| H  | -1.747660197443366 | 5.438109356738206  | 0.906948167275986  |
| H  | 1.217912577114976  | 5.829595369673268  | -1.655238589151946 |
| H  | 1.922392697894642  | 5.817064544292040  | -0.156952843570579 |
| H  | 3.184862952321212  | 4.030657309829330  | -1.333204563656032 |
| H  | 4.121976198497325  | 2.705866537366188  | -1.814711064445287 |
| H  | 5.178559871681752  | 2.362704168912062  | 0.078939406470832  |
| H  | 6.034427008840616  | 1.162660026711194  | 0.930349464717682  |
| H  | 6.090064686061726  | -1.360493679783261 | 0.685684078041558  |
| H  | 5.445963411644426  | -1.245484326517278 | 2.203338292943700  |
| H  | 4.137967837581932  | -3.147616569251557 | 1.225054753235024  |
| H  | 2.843805931293614  | -4.040697510493338 | 1.821283089992578  |
| H  | 2.394493723368720  | -5.197227305714904 | 0.007797740645212  |
| H  | 1.282294368438672  | -5.967018412214076 | -0.974561718427346 |
| H  | -5.139445717919035 | -2.412942616667998 | 0.243019625495206  |
| H  | -6.031907248825650 | -1.104483904330735 | 0.777048288196264  |
| H  | -4.196511975667264 | 3.165558098538316  | 0.567954018913822  |
| H  | -3.111209155993599 | 4.315249472767366  | -0.034208793836537 |
| H  | -0.615709809799142 | 6.224614994165182  | -0.033054096871120 |

Transition Metal: Fe; Functional Group: NH2; Adsorbate: O

|    |                    |                    |                    |
|----|--------------------|--------------------|--------------------|
| Fe | 0.026516689656266  | -0.021950064657748 | 0.297058859094156  |
| C  | 0.796028746143272  | 4.108040867188020  | -0.576015943465237 |
| C  | 1.172455185949162  | 2.715607073869362  | -0.504573726172257 |
| C  | 2.493678918246482  | 2.218041908084852  | -0.644790852012914 |
| C  | -0.705966611349918 | -4.168983805835488 | -0.487417686705285 |
| C  | -1.106493772367834 | -2.783084473935254 | -0.416529181786927 |
| C  | -2.403761087749835 | -2.291549639524078 | -0.634853618327540 |
| C  | 0.628564194183968  | -4.224374713208576 | -0.124944340296913 |
| C  | 1.024758150724908  | -2.870449433800406 | 0.206135087125764  |
| C  | -0.502036952342571 | 4.196719828635982  | -0.095340557702180 |
| C  | 2.310592504667448  | -2.486734011671917 | 0.649414849703828  |
| C  | -4.134406020278332 | 0.715490068972940  | 0.453739059953110  |
| C  | -0.956429379461483 | 2.846778079170388  | 0.147016569671248  |
| C  | -2.757719682442328 | 1.141678788462106  | 0.366401567862736  |
| C  | -4.173939571297822 | -0.616786463089817 | 0.066344777205720  |
| C  | -2.814276544786317 | -1.000396702369994 | -0.222769549209985 |
| C  | -2.297121906615690 | 2.480248032687272  | 0.432881735131904  |
| C  | 4.219735526514718  | 0.573750386512642  | 0.209328389499592  |
| C  | 2.876085626627756  | 0.936317118744760  | -0.202774974656297 |
| C  | 4.146860670990492  | -0.721583444552497 | 0.701363899799306  |
| C  | 2.785475810903468  | -1.166603228634330 | 0.517562041595174  |
| N  | 0.089517409961824  | 1.958236377804552  | -0.078194904980418 |
| N  | -0.031248998570998 | -1.997549020127522 | 0.001356950649610  |
| N  | -1.956806285394585 | 0.066911566957386  | 0.002586327890854  |
| N  | 2.011735356382266  | -0.130306417848164 | 0.006016939725388  |
| N  | 5.235804814846904  | -1.498225984953176 | 1.237409941779812  |
| N  | -5.260926272634357 | 1.529159991697258  | 0.809127889823096  |
| N  | -5.336978326422287 | -1.414870616652408 | -0.013081518535702 |
| N  | -1.247018851058858 | 5.394733091953712  | 0.050248537813654  |
| N  | 1.638250255651962  | 5.203446683834397  | -0.993595879669474 |
| N  | 5.377476892085716  | 1.359255809345392  | 0.143861174751808  |
| N  | -1.502793461516276 | -5.285461896846414 | -0.876357020618123 |
| N  | 1.410668035021782  | -5.404630195006106 | -0.112656891999872 |
| N  | -3.225825982824727 | 3.491884200066116  | 0.706821699478494  |
| N  | 3.521110461826564  | 3.086364413368242  | -1.089083137250437 |
| N  | -3.390609374821018 | -3.151918592999763 | -1.187832773794455 |
| N  | 3.183560922722440  | -3.515450356304854 | 1.089671324637444  |
| H  | -2.398747888637793 | -5.298862942599991 | -0.379844541442250 |
| H  | -1.018384909331406 | -6.155868003107143 | -0.640100103328475 |
| H  | -2.982958605123976 | -3.899637487324263 | -1.752232381482031 |
| H  | -4.078450405230086 | -2.640219650847623 | -1.741882117178360 |
| H  | -5.415178120552071 | 1.575785728631520  | 1.821597927430100  |
| H  | -6.122349993777066 | 1.203626395170446  | 0.365170222398484  |
| H  | -1.611270195860044 | 5.513733835827161  | 0.999679459541228  |
| H  | 1.213877861199792  | 5.747568334871698  | -1.750047468240105 |
| H  | 1.851632684150382  | 5.847558935737424  | -0.224526791856348 |
| H  | 3.155985363893370  | 4.008371404065116  | -1.356395299443641 |
| H  | 4.101809385124050  | 2.672645079873596  | -1.819576076134847 |
| H  | 5.170757641963990  | 2.358360677772800  | 0.063576164660676  |
| H  | 6.038416956993924  | 1.160782291417808  | 0.896220317130686  |
| H  | 6.089939922552410  | -1.373859518272084 | 0.685435360007218  |
| H  | 5.452849022997311  | -1.236697836278712 | 2.205425986949084  |
| H  | 4.115089514402094  | -3.144566854983182 | 1.313043196280092  |
| H  | 2.799085682799238  | -4.043938253142734 | 1.875250037563094  |
| H  | 2.398232031834084  | -5.180199937338623 | 0.045247872264364  |
| H  | 1.321018528369358  | -5.927692651109592 | -0.987635448490838 |
| H  | -5.140165043396397 | -2.410960161721121 | 0.103522625518372  |
| H  | -6.042286174591482 | -1.123944118002544 | 0.667541438384782  |
| H  | -4.197034444955500 | 3.168168013643682  | 0.631279969421376  |
| H  | -3.052083717432939 | 4.359493815258110  | 0.196972116732626  |
| H  | -0.674949803190781 | 6.210845329267732  | -0.180760549525388 |
| O  | 0.020905755507584  | 0.035304900605438  | 1.956772538181056  |

Transition Metal: Fe; Functional Group: NH2; Adsorbate: OH

|    |                     |                    |                    |
|----|---------------------|--------------------|--------------------|
| Fe | -0.027572624520637  | -0.005780982971594 | 0.640483458908750  |
| C  | 0.808743832738696   | 4.153572539951019  | -0.533892968029846 |
| C  | 1.183526110961266   | 2.761940587978338  | -0.395230964341884 |
| C  | 2.510141694809458   | 2.237149334267418  | -0.482252025010922 |
| C  | -0.696172127400576  | -4.146738761215564 | -0.647982977905180 |
| C  | -1.1452142220538076 | -2.794233718090414 | -0.390724494285077 |
| C  | -2.468936482978179  | -2.294529698994936 | -0.536903652111665 |
| C  | 0.614315295543924   | -4.236241283263487 | -0.187904241192051 |
| C  | 0.970806996467100   | -2.914536727692870 | 0.296265751008814  |
| C  | -0.516329452616386  | 4.257731964726529  | -0.123128300626970 |
| C  | 2.274668645254948   | -2.517670512495044 | 0.713002366215230  |
| C  | -4.218834000473759  | 0.785597512292248  | 0.371482805933826  |
| C  | -0.979891722348516  | 2.914859108697244  | 0.150616028828166  |
| C  | -2.832032068746987  | 1.191930695820606  | 0.316068285720230  |
| C  | -4.258295167726533  | -0.568505753314529 | 0.051758059969700  |
| C  | -2.888640836981310  | -0.979792672814423 | -0.181399078077888 |
| C  | -2.340077945454404  | 2.534514013266274  | 0.376735579225222  |
| C  | 4.241364497603954   | 0.537195086857056  | 0.312179511995400  |
| C  | 2.894737985462180   | 0.934495105657388  | -0.068764056775880 |
| C  | 4.158090337674533   | -0.776545785794386 | 0.764593817467320  |
| C  | 2.782217950874086   | -1.192670529316835 | 0.598471242896076  |
| N  | 0.081677696228476   | 2.034316286313552  | 0.015444479518542  |
| N  | -0.105254339748267  | -2.064053883550166 | 0.156191815100302  |
| N  | -2.042631707269493  | 0.095675032913692  | 0.024466838684686  |
| N  | 2.028654934515146   | -0.126520143670927 | 0.133722596465348  |
| N  | 5.248195700562880   | -1.584260344797698 | 1.259253844899976  |
| N  | -5.356711353291956  | 1.624461748797052  | 0.635194602026774  |
| N  | -5.426133473300965  | -1.349764222091967 | -0.028363068172695 |
| N  | -1.273617412684743  | 5.459827238239648  | -0.063033617496360 |
| N  | 1.661863127930758   | 5.238075084367688  | -0.962840455681555 |
| N  | 5.414596857900699   | 1.297464067511706  | 0.235480154782412  |
| N  | -1.465844004206613  | -5.209865698315422 | -1.250188701085808 |
| N  | 1.413279459591168   | -5.387447325653355 | -0.211744162718048 |
| N  | -3.273779233462271  | 3.547895869479892  | 0.596057951044368  |
| N  | 3.555549278989900   | 3.113468888130300  | -0.866905334339656 |
| N  | -3.472833316897635  | -3.191839601168482 | -0.958537296825043 |
| N  | 3.162486646401790   | -3.551622873032340 | 1.087589007110716  |
| H  | -1.385024015622786  | -6.078556627244165 | -0.712121427193686 |
| H  | -1.156729144897767  | -5.412936383100886 | -2.207412714508891 |
| H  | -3.089164810006448  | -4.107173470073679 | -1.227545792937214 |
| H  | -4.103110497383874  | -2.808471729997748 | -1.663305968627430 |
| H  | -5.596799175133352  | 1.662907471551252  | 1.631834519679542  |
| H  | -6.183104169890285  | 1.304970487034472  | 0.122760462167060  |
| H  | -1.600256788655400  | 5.661952390751390  | 0.886871046368566  |
| H  | 1.325029052366430   | 5.669319495800074  | -1.829049753779827 |
| H  | 1.737235294433950   | 5.976457899079964  | -0.255155227392109 |
| H  | 3.201833672542132   | 4.041923531726338  | -1.128951914002446 |
| H  | 4.165870998715072   | 2.720293052469186  | -1.584558739785734 |
| H  | 5.237708681969783   | 2.305036773899144  | 0.242220358797034  |
| H  | 6.121442101970725   | 1.021846355969250  | 0.918756358024536  |
| H  | 6.056772265673104   | -1.548476186989433 | 0.629894851972814  |
| H  | 5.567082048479122   | -1.272640798951358 | 2.183342239909776  |
| H  | 4.088901882583978   | -3.191101240411953 | 1.348152034451630  |
| H  | 2.777663181634720   | -4.182289313134719 | 1.791658325678732  |
| H  | 2.412203536437102   | -5.174793663446868 | -0.149526566239138 |
| H  | 1.199743188496592   | -6.010651643917857 | -0.992023489308323 |
| H  | -5.232774146673078  | -2.347920282612499 | 0.084020506303214  |
| H  | -6.146040395389171  | -1.042447815978925 | 0.629232945121274  |
| H  | -4.246433044842002  | 3.238811251900106  | 0.483668352877344  |
| H  | -3.056550751826205  | 4.430776999925234  | 0.131373123793322  |
| H  | -0.718894944402116  | 6.258473402738010  | -0.383105698694614 |
| H  | 0.625782618324000   | 0.580538043179774  | 2.948963544969200  |
| O  | -0.078244056887851  | 0.062408167960706  | 2.520098180109648  |



Transition Metal: Fe; Functional Group: NH2; Adsorbate: OOH

|    |                    |                    |                    |
|----|--------------------|--------------------|--------------------|
| Fe | -0.010061627695158 | -0.000025759879748 | 0.305965854417862  |
| C  | 0.802295690418288  | 4.102439574598738  | -0.579474705442784 |
| C  | 1.175316131099110  | 2.709882395161182  | -0.475928397290225 |
| C  | 2.492027707102474  | 2.198481981842688  | -0.601498844582505 |
| C  | -0.681586182442175 | -4.098468920228761 | -0.684557911827767 |
| C  | -1.121794289078885 | -2.734977167030934 | -0.494306685524645 |
| C  | -2.433759832973912 | -2.245631507276006 | -0.669187201665075 |
| C  | 0.596362077472550  | -4.192182720029558 | -0.149392622947349 |
| C  | 0.954336982696578  | -2.861690172560706 | 0.302417532555860  |
| C  | -0.485145879779427 | 4.209077744775596  | -0.072740238332237 |
| C  | 2.236170941027914  | -2.482776129410365 | 0.774943904777908  |
| C  | -4.135006747443237 | 0.756346684327942  | 0.484290109265268  |
| C  | -0.940778303832932 | 2.868319579422506  | 0.212604743914222  |
| C  | -2.756017942825309 | 1.173564075917962  | 0.400722780905760  |
| C  | -4.189697076025334 | -0.565793353617604 | 0.063303284931410  |
| C  | -2.832884258787846 | -0.955598083190807 | -0.242230238458411 |
| C  | -2.281176893919397 | 2.504512385374054  | 0.517226314002046  |
| C  | 4.193457061561544  | 0.542147534461168  | 0.289682595375988  |
| C  | 2.858608175902710  | 0.917998472896200  | -0.136168312275707 |
| C  | 4.096568955735850  | -0.740549452232514 | 0.811021897065512  |
| C  | 2.729336210008056  | -1.169247645655783 | 0.629344694058872  |
| N  | 0.093882800950182  | 1.969591300080350  | -0.011497754324260 |
| N  | -0.089768440419768 | -1.981311128936312 | 0.061604470027748  |
| N  | -1.966533857304206 | 0.103545259351702  | -0.001808287109536 |
| N  | 1.974249225451602  | -0.129094338610869 | 0.092030231289198  |
| N  | 5.168303370941744  | -1.520914137312349 | 1.378523671928748  |
| N  | -5.255412403592480 | 1.570749225537056  | 0.858853173718074  |
| N  | -5.360303053241928 | -1.344045305304839 | -0.030657803608626 |
| N  | -1.230738962261409 | 5.411381002770642  | 0.061361133257376  |
| N  | 1.643247314725864  | 5.181351021378991  | -1.041049845480096 |
| N  | 5.366831395138306  | 1.303091110333196  | 0.204446215207096  |
| N  | -1.443499393200234 | -5.166524291230925 | -1.285913338275581 |
| N  | 1.375205190351742  | -5.354250363463455 | -0.076623088117525 |
| N  | -3.192633000099036 | 3.508621621020506  | 0.852569153881612  |
| N  | 3.531246056454462  | 3.052201744140580  | -1.045525052617108 |
| N  | -3.438737414187607 | -3.115589816962672 | -1.149759012564971 |
| N  | 3.103621348950300  | -3.512977767440152 | 1.215565132666334  |
| H  | -1.422141237771029 | -6.011659777852344 | -0.706445032360364 |
| H  | -1.079920442121310 | -5.421580860298718 | -2.210826620008934 |
| H  | -3.058071917469036 | -4.029479941309352 | -1.424263825080494 |
| H  | -4.021972794430258 | -2.700882946017817 | -1.876994056925852 |
| H  | -5.407377294998410 | 1.590987511582676  | 1.873092971385216  |
| H  | -6.117032897561316 | 1.243331423427744  | 0.414788422013774  |
| H  | -1.479918197604860 | 5.602937216941078  | 1.036531314476918  |
| H  | 1.268145520543712  | 5.626146531130244  | -1.884131275946071 |
| H  | 1.763664943625968  | 5.909751281026764  | -0.329630456329227 |
| H  | 3.177840556561686  | 3.977890919381384  | -1.314839485604438 |
| H  | 4.112163067666774  | 2.631496355910610  | -1.771420599552258 |
| H  | 5.179809198547513  | 2.305340106843550  | 0.116491701252538  |
| H  | 6.031176236426285  | 1.099014534176064  | 0.952478880166408  |
| H  | 6.021505060457521  | -1.448783756692151 | 0.815235501012710  |
| H  | 5.401566992486360  | -1.213770152751582 | 2.329248954838512  |
| H  | 4.025895192862170  | -3.144518435871557 | 1.478994170935864  |
| H  | 2.699739337062282  | -4.094915986708955 | 1.950418561617178  |
| H  | 2.372856829288578  | -5.152261756704796 | 0.031758459988762  |
| H  | 1.192593514508518  | -6.010743338364490 | -0.836693719022367 |
| H  | -5.151529803814219 | -2.345603376394720 | -0.054029377322774 |
| H  | -6.024519159949975 | -1.132122622435233 | 0.717111032848994  |
| H  | -4.169689956668623 | 3.206033515439818  | 0.763757456260306  |
| H  | -3.002467019311492 | 4.405690353000654  | 0.403356363378344  |
| H  | -0.699276266573186 | 6.211311423794939  | -0.291705939553665 |
| H  | -0.437819806759340 | -1.620537013277580 | 2.755921670450274  |
| O  | -0.003541489112582 | 0.145118230313194  | 2.073644139025718  |
| O  | -0.914107698904814 | -0.770475737085114 | 2.868417255958738  |

Transition Metal: Fe; Functional Group: OH; Adsorbate: Clean

|    |                    |                    |                   |
|----|--------------------|--------------------|-------------------|
| H  | 9.382330000000000  | 16.827490000000001 | 8.182000000000000 |
| H  | 7.991910000000000  | 15.223860000000000 | 7.123940000000000 |
| H  | 12.400990000000000 | 5.378370000000000  | 6.477260000000000 |
| H  | 14.031590000000000 | 6.776360000000000  | 7.406540000000000 |
| H  | 10.126500000000000 | 4.887490000000000  | 7.991960000000000 |
| H  | 11.967129999999999 | 17.113880000000002 | 7.544520000000000 |
| H  | 6.749880000000000  | 7.988320000000000  | 8.489570000000001 |
| H  | 17.096109999999999 | 11.978149999999999 | 8.352090000000000 |
| H  | 16.068660000000001 | 8.637079999999999  | 7.673580000000000 |
| H  | 15.237670000000000 | 14.044779999999999 | 8.525470000000000 |
| H  | 5.927500000000000  | 13.363920000000000 | 7.433300000000000 |
| H  | 4.888310000000000  | 10.033210000000000 | 8.141260000000001 |
| C  | 10.325630000000000 | 15.217000000000001 | 7.596410000000000 |
| C  | 9.913230000000000  | 13.845599999999999 | 7.605770000000000 |
| C  | 8.589060000000000  | 13.410010000000000 | 7.476350000000000 |
| C  | 11.661320000000000 | 6.813920000000000  | 7.580520000000000 |
| C  | 12.080370000000000 | 8.184060000000001  | 7.610270000000000 |
| C  | 13.412280000000001 | 8.611230000000001  | 7.551970000000000 |
| C  | 10.318930000000000 | 6.775510000000000  | 7.890830000000000 |
| C  | 9.894769999999999  | 8.150150000000000  | 8.024550000000000 |
| C  | 11.682820000000000 | 15.253439999999999 | 7.834820000000000 |
| C  | 8.568450000000000  | 8.577980000000000  | 8.216390000000001 |
| C  | 15.195869999999999 | 11.667149999999999 | 8.186669999999999 |
| C  | 12.104120000000000 | 13.881430000000000 | 7.991630000000000 |
| C  | 13.828510000000000 | 12.110720000000001 | 8.138890000000000 |
| C  | 15.211530000000000 | 10.318000000000000 | 7.919970000000000 |
| C  | 13.836570000000000 | 9.925760000000000  | 7.756210000000000 |
| C  | 13.424670000000001 | 13.454549999999999 | 8.216600000000000 |
| C  | 6.783190000000000  | 11.698020000000000 | 7.777420000000000 |
| C  | 8.161930000000000  | 12.096060000000000 | 7.678460000000000 |
| C  | 6.792730000000000  | 10.353640000000000 | 8.068809999999999 |
| C  | 8.162480000000000  | 9.917240000000000  | 8.096270000000001 |
| Fe | 10.997629999999999 | 11.016500000000001 | 7.878380000000000 |
| O  | 9.490209999999999  | 16.326239999999999 | 7.350120000000000 |
| O  | 7.581350000000000  | 14.332020000000000 | 7.194230000000000 |
| O  | 12.497320000000000 | 5.690740000000000  | 7.398120000000000 |
| O  | 14.429560000000000 | 7.675470000000000  | 7.358040000000000 |
| O  | 9.533130000000000  | 5.663620000000000  | 8.023230000000000 |
| O  | 12.481840000000000 | 16.364180000000001 | 7.902260000000000 |
| O  | 7.645690000000000  | 7.591910000000000  | 8.466220000000000 |
| O  | 16.274830000000001 | 12.497330000000000 | 8.437989999999999 |
| O  | 16.352200000000000 | 9.557280000000000  | 7.862170000000000 |
| O  | 14.343750000000000 | 14.442710000000000 | 8.471579999999999 |
| O  | 5.642340000000000  | 12.450799999999999 | 7.650270000000000 |
| O  | 5.706990000000000  | 9.521520000000001  | 8.280419999999999 |
| N  | 11.010470000000000 | 13.020730000000000 | 7.844260000000000 |
| N  | 10.984159999999999 | 9.009560000000000  | 7.849790000000000 |
| N  | 12.987000000000000 | 11.024920000000000 | 7.890080000000000 |
| N  | 9.010439999999999  | 11.005020000000000 | 7.874350000000000 |

Transition Metal: Fe; Functional Group: OH; Adsorbate: O

|    |                    |                    |                   |
|----|--------------------|--------------------|-------------------|
| H  | 9.389089999999999  | 16.828990000000001 | 7.415530000000000 |
| H  | 8.015280000000001  | 15.198829999999999 | 6.364530000000000 |
| H  | 12.356050000000000 | 5.418440000000000  | 5.700110000000000 |
| H  | 14.009460000000001 | 6.795790000000000  | 6.625250000000000 |
| H  | 10.113320000000000 | 4.892490000000000  | 7.271290000000000 |
| H  | 11.990480000000000 | 17.102470000000000 | 6.864030000000000 |
| H  | 6.772430000000000  | 8.006169999999999  | 7.946640000000000 |
| H  | 17.097159999999999 | 11.986129999999999 | 7.639460000000000 |
| H  | 16.060040000000001 | 8.652460000000000  | 6.878800000000000 |
| H  | 15.215999999999999 | 14.030300000000000 | 7.962970000000000 |
| H  | 5.941370000000000  | 13.340310000000001 | 6.647120000000000 |
| H  | 4.893550000000000  | 10.025790000000001 | 7.486940000000000 |
| C  | 10.333090000000000 | 15.201689999999999 | 6.882830000000000 |
| C  | 9.928400000000000  | 13.826440000000000 | 6.874920000000000 |
| C  | 8.606750000000000  | 13.386039999999999 | 6.722050000000000 |
| C  | 11.650130000000001 | 6.827820000000000  | 6.859510000000000 |
| C  | 12.066750000000001 | 8.200020000000000  | 6.889050000000000 |
| C  | 13.398020000000001 | 8.629189999999999  | 6.807070000000000 |
| C  | 10.317920000000001 | 6.782050000000000  | 7.209520000000000 |
| C  | 9.898440000000001  | 8.155700000000000  | 7.367900000000000 |
| C  | 11.679169999999999 | 15.246499999999999 | 7.175230000000000 |
| C  | 8.578600000000000  | 8.585699999999999  | 7.598570000000000 |
| C  | 15.196260000000001 | 11.669879999999999 | 7.475780000000000 |
| C  | 12.098810000000000 | 13.874100000000000 | 7.339680000000000 |
| C  | 13.827940000000000 | 12.110510000000000 | 7.450850000000000 |
| C  | 15.207929999999999 | 10.328430000000001 | 7.173160000000000 |
| C  | 13.827980000000000 | 9.941890000000001  | 7.013030000000000 |
| C  | 13.416380000000000 | 13.446389999999999 | 7.588420000000000 |
| C  | 6.791610000000000  | 11.683199999999999 | 7.044480000000000 |
| C  | 8.175030000000000  | 12.073850000000000 | 6.930030000000000 |
| C  | 6.797990000000000  | 10.352880000000001 | 7.393210000000000 |
| C  | 8.168170000000000  | 9.918720000000000  | 7.429310000000000 |
| Fe | 10.998500000000000 | 11.014189999999999 | 7.465700000000000 |
| O  | 10.991090000000000 | 11.026579999999999 | 9.121219999999999 |
| O  | 9.497430000000000  | 16.300450000000001 | 6.600690000000000 |
| O  | 7.606580000000000  | 14.304349999999999 | 6.424760000000000 |
| O  | 12.482350000000000 | 5.713340000000000  | 6.623350000000000 |
| O  | 14.407870000000001 | 7.696250000000000  | 6.593670000000000 |
| O  | 9.528470000000000  | 5.672750000000000  | 7.337400000000000 |
| O  | 12.476730000000000 | 16.356660000000002 | 7.266490000000000 |
| O  | 7.669860000000000  | 7.612670000000000  | 7.915580000000000 |
| O  | 16.274039999999999 | 12.502739999999999 | 7.722620000000000 |
| O  | 16.345980000000001 | 9.571000000000000  | 7.070840000000000 |
| O  | 14.319610000000001 | 14.423670000000000 | 7.908790000000000 |
| O  | 5.654550000000000  | 12.431250000000000 | 6.877330000000000 |
| O  | 5.716250000000000  | 9.522169999999999  | 7.630970000000000 |
| N  | 11.022449999999999 | 13.013230000000000 | 7.135970000000000 |
| N  | 10.975910000000001 | 9.014950000000001  | 7.158070000000000 |
| N  | 12.987150000000000 | 11.038370000000000 | 7.164780000000000 |
| N  | 9.013859999999999  | 10.986510000000001 | 7.144450000000000 |

Transition Metal: Fe; Functional Group: OH; Adsorbate: OH

|    |                    |                    |                   |
|----|--------------------|--------------------|-------------------|
| H  | 11.116730000000000 | 10.211860000000000 | 9.777520000000001 |
| H  | 9.414370000000000  | 16.857460000000000 | 7.309820000000000 |
| H  | 8.000150000000000  | 15.207150000000000 | 6.340740000000000 |
| H  | 12.377100000000000 | 5.433440000000000  | 5.546720000000000 |
| H  | 14.019750000000000 | 6.781710000000000  | 6.561700000000000 |
| H  | 10.088690000000000 | 4.868920000000000  | 6.997580000000000 |
| H  | 11.994719999999999 | 17.103130000000000 | 6.670110000000000 |
| H  | 6.738420000000000  | 7.973280000000000  | 7.697530000000000 |
| H  | 17.104379999999999 | 11.988220000000000 | 7.471620000000000 |
| H  | 16.060730000000000 | 8.642690000000000  | 6.824040000000000 |
| H  | 15.240750000000000 | 14.045220000000000 | 7.758690000000000 |
| H  | 5.937940000000000  | 13.347810000000001 | 6.608680000000000 |
| H  | 4.882790000000000  | 10.011440000000000 | 7.293570000000000 |
| C  | 10.332590000000000 | 15.212719999999999 | 6.787160000000000 |
| C  | 9.922079999999999  | 13.841020000000000 | 6.825120000000000 |
| C  | 8.597390000000001  | 13.394959999999999 | 6.696360000000000 |
| C  | 11.648280000000000 | 6.809070000000000  | 6.732440000000000 |
| C  | 12.071000000000000 | 8.174840000000000  | 6.830000000000000 |
| C  | 13.402559999999999 | 8.611840000000001  | 6.767310000000000 |
| C  | 10.300770000000000 | 6.758810000000000  | 7.029120000000000 |
| C  | 9.884100000000000  | 8.126020000000000  | 7.234890000000000 |
| C  | 11.689870000000001 | 15.256340000000000 | 7.034880000000000 |
| C  | 8.559650000000000  | 8.559350000000000  | 7.437760000000000 |
| C  | 15.199960000000001 | 11.670780000000001 | 7.371480000000000 |
| C  | 12.106019999999999 | 13.886860000000000 | 7.226020000000000 |
| C  | 13.831899999999999 | 12.112439999999999 | 7.353800000000000 |
| C  | 15.208119999999999 | 10.321009999999999 | 7.103810000000000 |
| C  | 13.827460000000000 | 9.928680000000000  | 6.967800000000000 |
| C  | 13.427809999999999 | 13.455450000000001 | 7.454270000000000 |
| C  | 6.786140000000000  | 11.681839999999999 | 6.968910000000000 |
| C  | 8.170040000000000  | 12.077380000000000 | 6.883990000000000 |
| C  | 6.788580000000000  | 10.338979999999999 | 7.269010000000000 |
| C  | 8.158140000000000  | 9.902250000000000  | 7.310950000000000 |
| Fe | 10.994380000000000 | 11.012680000000000 | 7.428570000000000 |
| O  | 10.975090000000000 | 11.063840000000001 | 9.325970000000000 |
| O  | 9.496390000000000  | 16.310590000000001 | 6.503950000000000 |
| O  | 7.590730000000000  | 14.315009999999999 | 6.420470000000000 |
| O  | 12.479410000000000 | 5.697120000000000  | 6.482250000000000 |
| O  | 14.418220000000000 | 7.681730000000000  | 6.551720000000000 |
| O  | 9.504379999999999  | 5.648130000000000  | 7.079600000000000 |
| O  | 12.492730000000000 | 16.365420000000000 | 7.073200000000000 |
| O  | 7.635200000000000  | 7.577580000000000  | 7.687630000000000 |
| O  | 16.284300000000002 | 12.504940000000000 | 7.580110000000000 |
| O  | 16.346620000000001 | 9.563510000000001  | 7.006620000000000 |
| O  | 14.344540000000000 | 14.440000000000000 | 7.717030000000000 |
| O  | 5.649820000000000  | 12.431910000000000 | 6.810230000000000 |
| O  | 5.700040000000000  | 9.505170000000000  | 7.458270000000000 |
| N  | 11.015100000000000 | 13.034689999999999 | 7.089370000000000 |
| N  | 10.980010000000000 | 8.979990000000001  | 7.117870000000000 |
| N  | 12.990349999999999 | 11.029570000000000 | 7.110510000000000 |
| N  | 9.004230000000000  | 10.982699999999999 | 7.078350000000000 |

Transition Metal: Fe; Functional Group: OH; Adsorbate: OOH

|    |                    |                    |                    |
|----|--------------------|--------------------|--------------------|
| H  | 9.410670000000000  | 16.844500000000000 | 7.258210000000000  |
| H  | 7.997890000000000  | 15.208240000000000 | 6.268240000000000  |
| H  | 12.394959999999999 | 5.434350000000000  | 5.467860000000000  |
| H  | 14.025740000000001 | 6.774280000000000  | 6.502170000000000  |
| H  | 10.097130000000000 | 4.865890000000000  | 6.902070000000000  |
| H  | 11.980700000000001 | 17.107710000000001 | 6.591980000000000  |
| H  | 6.731930000000000  | 7.964150000000000  | 7.558620000000000  |
| H  | 17.114200000000000 | 11.987990000000000 | 7.350890000000000  |
| H  | 16.069620000000000 | 8.635999999999999  | 6.740530000000000  |
| H  | 15.255179999999999 | 14.048920000000001 | 7.594650000000000  |
| H  | 5.938400000000000  | 13.348699999999999 | 6.529470000000000  |
| H  | 4.882140000000000  | 10.009720000000000 | 7.188790000000000  |
| H  | 10.408030000000000 | 9.332060000000000  | 9.536210000000001  |
| C  | 10.330840000000000 | 15.210870000000000 | 6.705430000000000  |
| C  | 9.922680000000000  | 13.839219999999999 | 6.739860000000000  |
| C  | 8.596970000000001  | 13.394909999999999 | 6.619320000000000  |
| C  | 11.655090000000000 | 6.807720000000000  | 6.648900000000000  |
| C  | 12.077199999999999 | 8.172010000000000  | 6.750910000000000  |
| C  | 13.408950000000001 | 8.607170000000000  | 6.690910000000000  |
| C  | 10.304330000000000 | 6.755940000000000  | 6.931360000000000  |
| C  | 9.883200000000000  | 8.121490000000000  | 7.133110000000000  |
| C  | 11.692110000000000 | 15.254460000000000 | 6.931210000000000  |
| C  | 8.555410000000000  | 8.553020000000000  | 7.320790000000000  |
| C  | 15.210270000000000 | 11.671400000000000 | 7.242410000000000  |
| C  | 12.113470000000000 | 13.885120000000001 | 7.105810000000000  |
| C  | 13.841519999999999 | 12.113340000000001 | 7.223680000000000  |
| C  | 15.217320000000001 | 10.318059999999999 | 6.997390000000000  |
| C  | 13.835310000000000 | 9.925829999999999  | 6.873610000000000  |
| C  | 13.439230000000000 | 13.457400000000000 | 7.313110000000000  |
| C  | 6.787090000000000  | 11.680870000000001 | 6.877840000000000  |
| C  | 8.170280000000000  | 12.078010000000001 | 6.805300000000000  |
| C  | 6.788190000000000  | 10.334740000000000 | 7.162540000000000  |
| C  | 8.157170000000001  | 9.897560000000000  | 7.208840000000000  |
| Fe | 10.996499999999999 | 11.013320000000000 | 7.267850000000000  |
| O  | 9.490740000000001  | 16.310659999999999 | 6.443500000000000  |
| O  | 7.589710000000000  | 14.315580000000001 | 6.347650000000000  |
| O  | 12.486599999999999 | 5.694870000000000  | 6.405480000000000  |
| O  | 14.424720000000001 | 7.673990000000000  | 6.491520000000000  |
| O  | 9.510350000000001  | 5.644270000000000  | 6.975710000000000  |
| O  | 12.492160000000000 | 16.364529999999998 | 6.967440000000000  |
| O  | 7.628270000000000  | 7.567390000000000  | 7.545130000000000  |
| O  | 16.293849999999999 | 12.507840000000000 | 7.441160000000000  |
| O  | 16.355290000000000 | 9.559150000000001  | 6.909560000000000  |
| O  | 14.359280000000000 | 14.444550000000000 | 7.550920000000000  |
| O  | 5.650880000000000  | 12.431350000000000 | 6.725200000000000  |
| O  | 5.699620000000000  | 9.499840000000001  | 7.341040000000000  |
| O  | 11.049880000000000 | 11.110670000000001 | 9.210270000000000  |
| O  | 10.357740000000000 | 10.162300000000000 | 10.059939999999999 |
| N  | 11.021409999999999 | 13.029830000000000 | 6.980720000000000  |
| N  | 10.981660000000000 | 8.980169999999999  | 7.028860000000000  |
| N  | 12.997840000000000 | 11.028720000000000 | 7.004030000000000  |
| N  | 9.007000000000000  | 10.982139999999999 | 6.999910000000000  |

Transition Metal: Mn; Functional Group: BH2; Adsorbate: Clean

|    |                    |                    |                   |
|----|--------------------|--------------------|-------------------|
| H  | 8.269670000000000  | 16.583310000000001 | 6.240410000000000 |
| H  | 10.004830000000000 | 17.610830000000000 | 6.696650000000000 |
| H  | 6.224690000000000  | 13.770880000000000 | 8.479279999999999 |
| H  | 6.767210000000000  | 15.415740000000000 | 7.477710000000000 |
| H  | 11.715840000000000 | 4.387480000000000  | 6.812130000000000 |
| H  | 13.416550000000001 | 5.398190000000000  | 6.212710000000000 |
| H  | 14.890390000000000 | 6.593460000000000  | 7.428720000000000 |
| H  | 15.646269999999999 | 8.233180000000001  | 6.509570000000000 |
| H  | 8.972590000000000  | 4.909660000000000  | 8.187070000000000 |
| H  | 8.731949999999999  | 5.161020000000000  | 6.152490000000000 |
| H  | 13.698850000000000 | 15.572880000000000 | 6.132660000000000 |
| H  | 12.921120000000000 | 17.288580000000000 | 6.896260000000000 |
| H  | 6.198470000000000  | 7.728660000000000  | 7.552830000000000 |
| H  | 7.624100000000000  | 6.274730000000000  | 7.509030000000000 |
| H  | 16.420310000000001 | 13.461570000000000 | 8.583090000000000 |
| H  | 17.483360000000001 | 11.954650000000001 | 7.640500000000000 |
| H  | 15.485870000000000 | 8.224259999999999  | 8.430280000000000 |
| H  | 17.175329999999999 | 8.991370000000000  | 7.606050000000000 |
| H  | 13.664859999999999 | 15.785539999999999 | 8.047129999999999 |
| H  | 15.297890000000001 | 14.981100000000000 | 7.181140000000000 |
| H  | 4.529380000000000  | 12.977240000000000 | 7.677250000000000 |
| H  | 6.041260000000000  | 13.764490000000000 | 6.561000000000000 |
| H  | 4.850420000000000  | 8.944310000000000  | 6.634630000000000 |
| H  | 5.011220000000000  | 8.941350000000000  | 8.692620000000000 |
| B  | 9.397190000000000  | 16.571069999999999 | 6.650970000000000 |
| B  | 6.942570000000000  | 14.235870000000000 | 7.439570000000000 |
| B  | 12.320390000000000 | 5.426710000000000  | 6.700470000000000 |
| B  | 14.737240000000000 | 7.776070000000000  | 7.397110000000000 |
| B  | 9.125980000000000  | 5.598530000000000  | 7.206960000000000 |
| B  | 12.831320000000000 | 16.102550000000001 | 7.025170000000000 |
| B  | 7.416800000000000  | 7.492850000000000  | 7.490240000000000 |
| B  | 16.427000000000000 | 12.457910000000000 | 7.923640000000000 |
| B  | 15.984310000000001 | 9.061520000000000  | 7.512140000000000 |
| B  | 14.108990000000000 | 14.859090000000000 | 7.189550000000000 |
| B  | 5.720370000000000  | 12.917249999999999 | 7.567590000000000 |
| B  | 5.503610000000000  | 9.200070000000000  | 7.619180000000000 |
| Mn | 10.868470000000000 | 11.012050000000000 | 7.326900000000000 |
| C  | 10.139960000000000 | 15.281820000000000 | 7.039250000000000 |
| C  | 9.664440000000001  | 13.903729999999999 | 7.195370000000000 |
| C  | 8.326070000000000  | 13.438070000000000 | 7.317560000000000 |
| C  | 11.595120000000000 | 6.718050000000000  | 7.104860000000000 |
| C  | 12.051069999999999 | 8.108430000000000  | 7.203470000000000 |
| C  | 13.369930000000000 | 8.593109999999999  | 7.292780000000000 |
| C  | 10.188350000000000 | 6.763220000000000  | 7.228810000000000 |
| C  | 9.832630000000000  | 8.146660000000001  | 7.324030000000000 |
| C  | 11.550079999999999 | 15.190270000000000 | 7.100730000000000 |
| C  | 8.475310000000000  | 8.547319999999999  | 7.420730000000000 |
| C  | 15.127359999999999 | 11.723860000000000 | 7.523890000000000 |
| C  | 11.886139999999999 | 13.816750000000001 | 7.235350000000000 |
| C  | 13.732440000000000 | 12.192420000000000 | 7.420120000000000 |
| C  | 15.056229999999999 | 10.330840000000000 | 7.455340000000000 |
| C  | 13.660190000000000 | 9.970330000000001  | 7.367060000000000 |
| C  | 13.265150000000000 | 13.502440000000000 | 7.314840000000000 |
| C  | 6.661730000000000  | 11.665020000000000 | 7.508300000000000 |
| C  | 8.050200000000000  | 12.075460000000000 | 7.400320000000000 |
| C  | 6.651680000000000  | 10.275340000000000 | 7.530260000000000 |
| C  | 8.060390000000000  | 9.886939999999999  | 7.443620000000000 |
| N  | 10.750410000000000 | 13.020099999999999 | 7.283690000000000 |
| N  | 10.944459999999999 | 8.972680000000000  | 7.300520000000000 |
| N  | 12.854780000000000 | 11.091740000000000 | 7.349190000000000 |
| N  | 8.902740000000000  | 10.974320000000001 | 7.371820000000000 |

Transition Metal: Mn; Functional Group: BH2; Adsorbate: O

|    |                    |                    |                   |
|----|--------------------|--------------------|-------------------|
| C  | 10.147340000000000 | 15.287330000000001 | 6.746390000000000 |
| C  | 9.671889999999999  | 13.895250000000001 | 6.876110000000000 |
| C  | 8.336110000000000  | 13.431749999999999 | 6.937100000000000 |
| C  | 11.581080000000000 | 6.708160000000000  | 6.818230000000000 |
| C  | 12.040960000000000 | 8.112620000000000  | 6.889220000000000 |
| C  | 13.352029999999999 | 8.598800000000001  | 6.919570000000000 |
| C  | 10.189650000000000 | 6.753510000000000  | 6.971810000000000 |
| C  | 9.839079999999999  | 8.157719999999999  | 7.056110000000000 |
| C  | 11.543270000000000 | 15.203989999999999 | 6.845310000000000 |
| C  | 8.481460000000000  | 8.548299999999999  | 7.139320000000000 |
| C  | 15.141890000000000 | 11.720549999999999 | 7.103480000000000 |
| C  | 11.884499999999999 | 13.816260000000000 | 6.972200000000000 |
| C  | 13.740240000000000 | 12.192170000000001 | 7.079900000000000 |
| C  | 15.054620000000000 | 10.327780000000001 | 7.004150000000000 |
| C  | 13.655920000000000 | 9.982370000000000  | 6.979010000000000 |
| C  | 13.261030000000000 | 13.510619999999999 | 7.034810000000000 |
| C  | 6.656270000000000  | 11.666720000000000 | 7.061090000000000 |
| C  | 8.049770000000001  | 12.066950000000000 | 7.006650000000000 |
| C  | 6.639630000000000  | 10.277469999999999 | 7.115610000000000 |
| C  | 8.055840000000000  | 9.889310000000000  | 7.097720000000000 |
| B  | 9.420389999999999  | 16.580549999999999 | 6.326440000000000 |
| B  | 6.948070000000000  | 14.239039999999999 | 6.985220000000000 |
| B  | 12.288140000000000 | 5.409540000000000  | 6.392010000000000 |
| B  | 14.724050000000000 | 7.771870000000000  | 6.946480000000000 |
| B  | 9.097080000000000  | 5.612500000000000  | 6.959050000000000 |
| B  | 12.822780000000000 | 16.122660000000000 | 6.794170000000000 |
| B  | 7.444780000000000  | 7.474000000000000  | 7.247120000000000 |
| B  | 16.468029999999999 | 12.431660000000001 | 7.448430000000000 |
| B  | 15.975120000000000 | 9.050110000000000  | 7.002880000000000 |
| B  | 14.096579999999999 | 14.878349999999999 | 6.938630000000000 |
| B  | 5.720500000000000  | 12.927759999999999 | 7.065810000000000 |
| B  | 5.480220000000000  | 9.215920000000001  | 7.173070000000000 |
| H  | 8.354570000000001  | 16.580269999999999 | 5.774850000000000 |
| H  | 9.985569999999999  | 17.630450000000000 | 6.494850000000000 |
| H  | 6.184160000000000  | 13.794400000000000 | 7.993730000000000 |
| H  | 6.781950000000000  | 15.421239999999999 | 6.995280000000000 |
| H  | 11.717779999999999 | 4.367320000000000  | 6.600990000000000 |
| H  | 13.330600000000000 | 5.383520000000000  | 5.798100000000000 |
| H  | 14.865930000000001 | 6.587480000000000  | 6.955190000000000 |
| H  | 15.581730000000000 | 8.223290000000000  | 6.013810000000000 |
| H  | 8.987890000000000  | 4.883950000000000  | 7.916780000000000 |
| H  | 8.680479999999999  | 5.199330000000000  | 5.902410000000000 |
| H  | 13.689090000000000 | 15.618220000000001 | 5.893970000000000 |
| H  | 12.904360000000000 | 17.311630000000001 | 6.693800000000000 |
| H  | 6.227530000000000  | 7.680810000000000  | 7.289910000000000 |
| H  | 7.687360000000000  | 6.260860000000000  | 7.357890000000000 |
| H  | 16.513710000000000 | 13.466740000000000 | 8.053280000000001 |
| H  | 17.499810000000000 | 11.875810000000000 | 7.172290000000000 |
| H  | 15.520880000000000 | 8.201150000000000  | 7.941150000000000 |
| H  | 17.168119999999998 | 8.970990000000000  | 7.037040000000000 |
| H  | 13.642659999999999 | 15.786630000000001 | 7.813650000000000 |
| H  | 15.282530000000000 | 15.011350000000000 | 6.941720000000000 |
| H  | 4.526310000000000  | 12.997150000000000 | 7.122380000000000 |
| H  | 6.089960000000000  | 13.768470000000001 | 6.067920000000000 |
| H  | 4.934360000000000  | 8.866250000000001  | 6.153730000000000 |
| H  | 4.908750000000000  | 9.003330000000000  | 8.215630000000001 |
| Mn | 10.866199999999999 | 11.026050000000000 | 7.290800000000000 |
| O  | 10.894959999999999 | 11.027990000000001 | 8.961349999999999 |
| N  | 10.753780000000001 | 13.024419999999999 | 6.988200000000000 |
| N  | 10.939489999999999 | 8.970670000000000  | 7.004480000000000 |
| N  | 12.867699999999999 | 11.104229999999999 | 7.013870000000000 |
| N  | 8.890620000000000  | 10.971030000000001 | 7.022380000000000 |

Transition Metal: Mn; Functional Group: BH2; Adsorbate: OH

|    |                    |                    |                   |
|----|--------------------|--------------------|-------------------|
| C  | 10.147550000000001 | 15.299709999999999 | 6.646740000000000 |
| C  | 9.671160000000000  | 13.909280000000001 | 6.768070000000000 |
| C  | 8.333430000000000  | 13.438580000000000 | 6.817010000000000 |
| C  | 11.582150000000000 | 6.705360000000000  | 6.707530000000000 |
| C  | 12.045140000000000 | 8.108269999999999  | 6.776880000000000 |
| C  | 13.353870000000001 | 8.599890000000000  | 6.801520000000000 |
| C  | 10.190110000000001 | 6.754070000000000  | 6.870420000000000 |
| C  | 9.843340000000000  | 8.159829999999999  | 6.961780000000000 |
| C  | 11.546820000000000 | 15.216320000000000 | 6.731320000000000 |
| C  | 8.483020000000000  | 8.549220000000000  | 7.050040000000000 |
| C  | 15.147220000000001 | 11.727000000000000 | 6.995010000000000 |
| C  | 11.888230000000000 | 13.829370000000001 | 6.847420000000000 |
| C  | 13.747000000000000 | 12.200440000000000 | 6.958000000000000 |
| C  | 15.056260000000000 | 10.332150000000000 | 6.901580000000000 |
| C  | 13.658960000000000 | 9.986980000000001  | 6.868180000000000 |
| C  | 13.265850000000000 | 13.518700000000001 | 6.901370000000000 |
| C  | 6.657530000000000  | 11.670880000000000 | 6.937080000000000 |
| C  | 8.048050000000000  | 12.074769999999999 | 6.888830000000000 |
| C  | 6.646570000000000  | 10.279949999999999 | 7.009620000000000 |
| C  | 8.064399999999999  | 9.896970000000000  | 7.004970000000000 |
| B  | 9.420859999999999  | 16.600840000000002 | 6.247470000000000 |
| B  | 6.940990000000000  | 14.242940000000001 | 6.846730000000000 |
| B  | 12.288869999999999 | 5.402830000000000  | 6.290960000000000 |
| B  | 14.727330000000000 | 7.775360000000000  | 6.823340000000000 |
| B  | 9.085319999999999  | 5.622920000000000  | 6.864050000000000 |
| B  | 12.826020000000000 | 16.132670000000001 | 6.667920000000000 |
| B  | 7.446730000000000  | 7.483410000000000  | 7.149100000000000 |
| B  | 16.470199999999998 | 12.438710000000000 | 7.345080000000000 |
| B  | 15.977259999999999 | 9.053979999999999  | 6.895400000000000 |
| B  | 14.101910000000000 | 14.886200000000001 | 6.793980000000000 |
| B  | 5.717680000000000  | 12.927569999999999 | 6.923160000000000 |
| B  | 5.499660000000000  | 9.202769999999999  | 7.077470000000000 |
| H  | 10.750510000000000 | 11.766529999999999 | 9.610970000000000 |
| H  | 8.358800000000000  | 16.610479999999999 | 5.689660000000000 |
| H  | 9.984040000000000  | 17.647739999999999 | 6.440020000000000 |
| H  | 6.167090000000000  | 13.806780000000000 | 7.849520000000000 |
| H  | 6.772670000000000  | 15.424950000000001 | 6.845990000000000 |
| H  | 11.709190000000000 | 4.364170000000000  | 6.490120000000000 |
| H  | 13.340579999999999 | 5.369910000000000  | 5.714630000000000 |
| H  | 14.872230000000000 | 6.591560000000000  | 6.818210000000000 |
| H  | 15.586580000000000 | 8.238260000000000  | 5.897310000000000 |
| H  | 8.977539999999999  | 4.899090000000000  | 7.825680000000000 |
| H  | 8.683350000000001  | 5.197030000000000  | 5.807240000000000 |
| H  | 13.680630000000001 | 15.625460000000000 | 5.755910000000000 |
| H  | 12.909700000000001 | 17.321480000000001 | 6.565560000000000 |
| H  | 6.225590000000000  | 7.696510000000000  | 7.187980000000000 |
| H  | 7.680820000000000  | 6.265570000000000  | 7.249970000000000 |
| H  | 16.513480000000001 | 13.494560000000000 | 7.913270000000000 |
| H  | 17.502459999999999 | 11.865050000000000 | 7.109430000000000 |
| H  | 15.520659999999999 | 8.197050000000001  | 7.824260000000000 |
| H  | 17.170059999999999 | 8.974480000000000  | 6.932810000000000 |
| H  | 13.660840000000000 | 15.794440000000000 | 7.675790000000000 |
| H  | 15.287750000000001 | 15.018890000000001 | 6.779280000000000 |
| H  | 4.523090000000000  | 12.993819999999999 | 6.963850000000000 |
| H  | 6.096430000000000  | 13.766670000000000 | 5.923410000000000 |
| H  | 4.934720000000000  | 8.865539999999999  | 6.063950000000000 |
| H  | 4.931040000000000  | 9.003590000000001  | 8.125040000000000 |
| Mn | 10.875930000000000 | 11.032019999999999 | 7.217490000000000 |
| O  | 10.894660000000000 | 10.935180000000001 | 9.122949999999999 |
| N  | 10.753790000000000 | 13.039040000000000 | 6.875180000000000 |
| N  | 10.941760000000000 | 8.965320000000000  | 6.906220000000000 |
| N  | 12.873329999999999 | 11.110020000000000 | 6.894470000000000 |
| N  | 8.891950000000000  | 10.974410000000001 | 6.925780000000000 |



Transition Metal: Mn; Functional Group: BH2; Adsorbate: OOH

|    |                    |                    |                    |
|----|--------------------|--------------------|--------------------|
| Mn | 10.866199999999999 | 11.026050000000000 | 7.290800000000000  |
| C  | 10.147340000000000 | 15.287330000000001 | 6.746390000000000  |
| C  | 9.671889999999999  | 13.895250000000001 | 6.876110000000000  |
| C  | 8.336110000000000  | 13.431749999999999 | 6.937100000000000  |
| C  | 11.581080000000000 | 6.708160000000000  | 6.818230000000000  |
| C  | 12.040960000000000 | 8.112620000000000  | 6.889220000000000  |
| C  | 13.352029999999999 | 8.598800000000001  | 6.919570000000000  |
| C  | 10.189650000000000 | 6.753510000000000  | 6.971810000000000  |
| C  | 9.839079999999999  | 8.157719999999999  | 7.056110000000000  |
| C  | 11.543270000000000 | 15.203989999999999 | 6.845310000000000  |
| C  | 8.481460000000000  | 8.548299999999999  | 7.139320000000000  |
| C  | 15.141890000000000 | 11.720549999999999 | 7.103480000000000  |
| C  | 11.884499999999999 | 13.816260000000000 | 6.972200000000000  |
| C  | 13.740240000000000 | 12.192170000000001 | 7.079900000000000  |
| C  | 15.054620000000000 | 10.327780000000001 | 7.004150000000000  |
| C  | 13.655920000000000 | 9.982370000000000  | 6.979010000000000  |
| C  | 13.261030000000000 | 13.510619999999999 | 7.034810000000000  |
| C  | 6.656270000000000  | 11.666720000000000 | 7.061090000000000  |
| C  | 8.049770000000001  | 12.066950000000000 | 7.006650000000000  |
| C  | 6.639630000000000  | 10.277469999999999 | 7.115610000000000  |
| C  | 8.055840000000000  | 9.889310000000000  | 7.097720000000000  |
| B  | 9.420389999999999  | 16.580549999999999 | 6.326440000000000  |
| B  | 6.948070000000000  | 14.239039999999999 | 6.985220000000000  |
| B  | 12.288140000000000 | 5.409540000000000  | 6.392010000000000  |
| B  | 14.724050000000000 | 7.771870000000000  | 6.946480000000000  |
| B  | 9.097080000000000  | 5.612500000000000  | 6.959050000000000  |
| B  | 12.822780000000000 | 16.122660000000000 | 6.794170000000000  |
| B  | 7.444780000000000  | 7.474000000000000  | 7.247120000000000  |
| B  | 16.468029999999999 | 12.431660000000001 | 7.448430000000000  |
| B  | 15.975120000000000 | 9.050110000000000  | 7.002880000000000  |
| B  | 14.096579999999999 | 14.878349999999999 | 6.938630000000000  |
| B  | 5.720500000000000  | 12.927759999999999 | 7.065810000000000  |
| B  | 5.480220000000000  | 9.215920000000001  | 7.173070000000000  |
| H  | 8.354570000000001  | 16.580269999999999 | 5.774850000000000  |
| H  | 9.985569999999999  | 17.630450000000000 | 6.494850000000000  |
| H  | 6.184160000000000  | 13.794400000000000 | 7.993730000000000  |
| H  | 6.781950000000000  | 15.421239999999999 | 6.995280000000000  |
| H  | 11.717779999999999 | 4.367320000000000  | 6.600990000000000  |
| H  | 13.330600000000000 | 5.383520000000000  | 5.798100000000000  |
| H  | 14.865930000000001 | 6.587480000000000  | 6.955190000000000  |
| H  | 15.581730000000000 | 8.223290000000000  | 6.013810000000000  |
| H  | 8.987890000000000  | 4.883950000000000  | 7.916780000000000  |
| H  | 8.680479999999999  | 5.199330000000000  | 5.902410000000000  |
| H  | 13.689090000000000 | 15.618220000000001 | 5.893970000000000  |
| H  | 12.904360000000000 | 17.311630000000001 | 6.693800000000000  |
| H  | 6.227530000000000  | 7.680810000000000  | 7.289910000000000  |
| H  | 7.687360000000000  | 6.260860000000000  | 7.357890000000000  |
| H  | 16.513710000000000 | 13.466740000000000 | 8.053280000000001  |
| H  | 17.499810000000000 | 11.875810000000000 | 7.172290000000000  |
| H  | 15.520880000000000 | 8.201150000000000  | 7.941150000000000  |
| H  | 17.168119999999998 | 8.970990000000000  | 7.037040000000000  |
| H  | 13.642659999999999 | 15.786630000000001 | 7.813650000000000  |
| H  | 15.282530000000000 | 15.011350000000000 | 6.941720000000000  |
| H  | 4.526310000000000  | 12.997150000000000 | 7.122380000000000  |
| H  | 6.089960000000000  | 13.768470000000001 | 6.067920000000000  |
| H  | 4.934360000000000  | 8.866250000000001  | 6.153730000000000  |
| H  | 4.908750000000000  | 9.003330000000000  | 8.215630000000001  |
| N  | 10.753780000000001 | 13.024419999999999 | 6.988200000000000  |
| N  | 10.939489999999999 | 8.970670000000000  | 7.004480000000000  |
| N  | 12.867699999999999 | 11.104229999999999 | 7.013870000000000  |
| N  | 8.890620000000000  | 10.971030000000001 | 7.022380000000000  |
| O  | 10.900626649332507 | 11.028372242687938 | 9.290502331099464  |
| H  | 10.079233067545946 | 10.871608475187058 | 10.987059327597715 |
| O  | 9.683003769601120  | 10.796635707491451 | 10.099593253199657 |

Transition Metal: Mn; Functional Group: CH3; Adsorbate: Clean

|   |                    |                    |                    |
|---|--------------------|--------------------|--------------------|
| H | 9.151660000000000  | 16.223569999999999 | 9.058410000000000  |
| H | 10.619470000000000 | 17.113130000000002 | 8.646649999999999  |
| H | 9.270569999999999  | 17.077739999999999 | 7.506150000000000  |
| H | 6.598550000000000  | 14.224679999999999 | 7.290450000000000  |
| H | 7.232090000000000  | 14.857360000000000 | 8.819870000000000  |
| H | 7.854370000000000  | 15.440659999999999 | 7.266940000000000  |
| H | 12.464510000000001 | 5.643250000000000  | 9.697089999999999  |
| H | 11.946249999999999 | 4.789010000000000  | 8.236230000000001  |
| H | 13.432580000000000 | 5.736520000000000  | 8.216329999999999  |
| H | 14.818400000000000 | 8.742060000000000  | 10.021870000000000 |
| H | 13.538449999999999 | 7.547370000000000  | 10.204730000000000 |
| H | 14.810380000000000 | 7.293740000000000  | 9.000220000000001  |
| H | 9.476920000000000  | 5.296560000000000  | 6.246970000000000  |
| H | 10.012680000000000 | 4.749990000000000  | 7.842790000000000  |
| H | 8.534990000000001  | 5.699200000000000  | 7.692250000000000  |
| H | 12.265190000000000 | 17.236429999999999 | 7.492210000000000  |
| H | 13.666169999999999 | 16.166530000000002 | 7.324310000000000  |
| H | 12.766700000000000 | 16.693049999999999 | 5.890630000000000  |
| H | 8.477309999999999  | 7.096410000000000  | 5.283650000000000  |
| H | 7.194240000000000  | 7.027180000000000  | 6.501130000000000  |
| H | 7.179800000000000  | 8.288270000000001  | 5.255690000000000  |
| H | 16.404859999999999 | 13.363390000000001 | 6.862710000000000  |
| H | 17.307530000000000 | 11.848250000000000 | 6.908090000000000  |
| H | 16.493169999999999 | 12.345030000000000 | 5.416900000000000  |
| H | 16.630610000000001 | 9.672929999999999  | 9.158460000000000  |
| H | 16.279750000000000 | 8.556139999999999  | 7.829380000000000  |
| H | 17.272600000000001 | 9.986319999999999  | 7.539340000000000  |
| H | 14.892799999999999 | 14.774830000000000 | 5.976110000000000  |
| H | 14.702760000000000 | 13.485010000000001 | 4.776160000000000  |
| H | 13.503150000000000 | 14.771080000000000 | 4.878560000000000  |
| H | 4.852020000000000  | 11.534030000000000 | 8.672090000000001  |
| H | 5.802280000000000  | 12.958500000000001 | 9.102950000000000  |
| H | 4.980450000000000  | 12.878050000000000 | 7.532320000000000  |
| H | 5.771990000000000  | 8.431850000000001  | 7.633020000000000  |
| H | 4.720820000000000  | 9.858660000000000  | 7.613600000000000  |
| H | 5.319240000000000  | 9.188490000000000  | 6.096290000000000  |
| C | 10.448740000000001 | 15.226400000000000 | 7.623400000000000  |
| C | 9.933550000000000  | 13.873070000000000 | 7.612900000000000  |
| C | 8.574220000000000  | 13.456289999999999 | 7.763700000000000  |
| C | 11.610090000000000 | 6.919470000000000  | 8.138120000000001  |
| C | 12.006959999999999 | 8.312030000000000  | 8.154030000000001  |
| C | 13.291550000000001 | 8.836840000000000  | 8.493040000000001  |
| C | 10.365360000000001 | 6.853790000000000  | 7.501910000000000  |
| C | 9.973129999999999  | 8.213020000000000  | 7.199640000000000  |
| C | 11.738500000000000 | 15.183059999999999 | 7.084140000000000  |
| C | 8.690659999999999  | 8.656660000000000  | 6.757130000000000  |
| C | 15.165210000000000 | 11.583990000000000 | 6.976530000000000  |
| C | 12.049510000000000 | 13.794210000000000 | 6.848380000000000  |
| C | 13.769740000000001 | 12.012940000000000 | 6.845110000000000  |
| C | 15.163660000000000 | 10.416090000000001 | 7.717350000000000  |
| C | 13.764150000000001 | 10.052390000000001 | 7.955690000000000  |
| C | 13.311780000000001 | 13.272330000000000 | 6.418330000000000  |
| C | 6.771350000000000  | 11.613630000000001 | 7.697200000000000  |
| C | 8.152390000000000  | 12.113759999999999 | 7.677470000000000  |
| C | 6.797820000000000  | 10.310510000000001 | 7.240380000000000  |
| C | 8.203220000000000  | 9.944010000000000  | 7.065120000000000  |
| C | 9.832770000000000  | 16.464169999999999 | 8.232630000000000  |
| C | 7.511290000000000  | 14.548060000000000 | 7.797960000000000  |
| C | 12.401360000000000 | 5.720300000000000  | 8.598680000000000  |
| C | 14.167080000000000 | 8.058700000000000  | 9.464530000000000  |
| C | 9.559659999999999  | 5.593690000000000  | 7.305600000000000  |
| C | 12.655799999999999 | 16.370509999999999 | 6.939720000000000  |
| C | 7.833410000000000  | 7.714120000000000  | 5.923770000000000  |
| C | 16.397349999999999 | 12.319480000000000 | 6.514690000000000  |
| C | 16.391510000000000 | 9.620410000000000  | 8.083110000000000  |
| C | 14.154790000000000 | 14.124100000000000 | 5.479880000000000  |

|    |                    |                    |                   |
|----|--------------------|--------------------|-------------------|
| C  | 5.547530000000000  | 12.287080000000000 | 8.272779999999999 |
| C  | 5.600540000000000  | 9.401090000000000  | 7.140910000000000 |
| Mn | 10.970610000000001 | 11.046010000000001 | 7.382650000000000 |
| N  | 10.966450000000000 | 13.013109999999999 | 7.224890000000000 |
| N  | 10.990159999999999 | 9.074140000000000  | 7.590050000000000 |
| N  | 12.942629999999999 | 11.041350000000000 | 7.413660000000000 |
| N  | 9.005720000000000  | 11.037850000000001 | 7.392100000000000 |

Transition Metal: Mn; Functional Group: CH3; Adsorbate: O

|   |                    |                    |                    |
|---|--------------------|--------------------|--------------------|
| H | 9.256800000000000  | 16.170470000000002 | 9.143720000000000  |
| H | 10.684010000000001 | 17.090109999999999 | 8.657730000000001  |
| H | 9.268070000000000  | 17.048810000000000 | 7.600670000000000  |
| H | 6.622530000000000  | 14.212859999999999 | 7.390890000000000  |
| H | 7.295260000000000  | 14.785940000000000 | 8.927149999999999  |
| H | 7.871050000000000  | 15.437260000000000 | 7.382210000000000  |
| H | 12.362679999999999 | 5.732090000000000  | 9.784210000000000  |
| H | 11.881330000000000 | 4.811440000000000  | 8.351050000000001  |
| H | 13.378100000000000 | 5.745270000000000  | 8.331780000000000  |
| H | 14.734710000000000 | 8.803970000000000  | 10.045360000000001 |
| H | 13.468420000000000 | 7.592450000000000  | 10.212759999999999 |
| H | 14.770680000000000 | 7.347470000000000  | 9.037080000000000  |
| H | 9.490629999999999  | 5.316210000000000  | 6.187020000000000  |
| H | 9.999720000000000  | 4.749680000000000  | 7.785850000000000  |
| H | 8.524770000000000  | 5.704610000000000  | 7.620340000000000  |
| H | 12.278740000000001 | 17.232749999999999 | 7.430830000000000  |
| H | 13.673710000000000 | 16.154499999999999 | 7.251110000000000  |
| H | 12.756840000000000 | 16.673559999999998 | 5.826530000000000  |
| H | 8.477420000000000  | 7.091910000000000  | 5.204980000000000  |
| H | 7.181400000000000  | 7.060720000000000  | 6.415020000000000  |
| H | 7.205800000000000  | 8.312020000000000  | 5.158450000000000  |
| H | 16.392360000000000 | 13.394890000000000 | 6.908090000000000  |
| H | 17.302510000000002 | 11.883960000000000 | 6.958000000000000  |
| H | 16.507169999999999 | 12.385479999999999 | 5.456990000000000  |
| H | 16.572479999999999 | 9.754250000000001  | 9.250400000000001  |
| H | 16.282319999999999 | 8.602700000000000  | 7.934500000000000  |
| H | 17.261920000000000 | 10.041430000000000 | 7.645950000000000  |
| H | 14.902590000000000 | 14.732279999999999 | 5.902870000000000  |
| H | 14.671350000000000 | 13.454129999999999 | 4.696820000000000  |
| H | 13.503240000000000 | 14.769140000000000 | 4.813770000000000  |
| H | 4.911940000000000  | 11.481550000000000 | 8.768560000000001  |
| H | 5.867740000000000  | 12.901070000000001 | 9.202859999999999  |
| H | 5.004400000000000  | 12.849069999999999 | 7.652410000000000  |
| H | 5.787830000000000  | 8.412100000000001  | 7.640970000000000  |
| H | 4.738220000000000  | 9.840040000000000  | 7.631640000000000  |
| H | 5.333440000000000  | 9.176690000000001  | 6.108620000000000  |
| C | 10.478030000000000 | 15.215590000000001 | 7.618340000000000  |
| C | 9.957739999999999  | 13.847700000000000 | 7.601260000000000  |
| C | 8.610080000000000  | 13.436500000000001 | 7.780600000000000  |
| C | 11.569150000000000 | 6.935950000000000  | 8.141790000000000  |
| C | 11.976889999999999 | 8.341320000000000  | 8.122370000000000  |
| C | 13.247070000000001 | 8.863060000000001  | 8.480499999999999  |
| C | 10.359000000000000 | 6.855890000000000  | 7.464860000000000  |
| C | 9.974380000000000  | 8.221750000000000  | 7.123300000000000  |
| C | 11.739000000000001 | 15.179950000000000 | 7.039680000000000  |
| C | 8.704650000000001  | 8.658210000000000  | 6.667320000000000  |
| C | 15.160500000000001 | 11.607590000000000 | 6.985460000000000  |
| C | 12.047169999999999 | 13.779620000000000 | 6.786340000000000  |
| C | 13.769370000000000 | 12.007360000000000 | 6.796910000000000  |
| C | 15.144819999999999 | 10.444940000000001 | 7.745230000000000  |
| C | 13.741569999999999 | 10.078329999999999 | 7.935750000000000  |
| C | 13.297090000000001 | 13.263990000000000 | 6.344630000000000  |
| C | 6.801250000000000  | 11.589420000000000 | 7.740140000000000  |
| C | 8.176180000000000  | 12.088500000000000 | 7.674100000000000  |
| C | 6.813920000000000  | 10.291940000000000 | 7.248420000000000  |
| C | 8.207850000000001  | 9.946479999999999  | 7.005280000000000  |
| C | 9.883250000000000  | 16.435440000000000 | 8.282209999999999  |
| C | 7.547200000000000  | 14.522530000000000 | 7.885680000000000  |
| C | 12.335319999999999 | 5.754870000000000  | 8.681940000000001  |
| C | 14.105230000000001 | 8.105210000000000  | 9.481850000000000  |
| C | 9.555899999999999  | 5.598990000000000  | 7.250290000000000  |
| C | 12.659000000000001 | 16.362010000000001 | 6.879610000000000  |
| C | 7.840700000000000  | 7.725990000000000  | 5.834710000000000  |
| C | 16.396500000000000 | 12.352850000000000 | 6.552740000000000  |
| C | 16.369360000000000 | 9.673500000000001  | 8.169219999999999  |
| C | 14.144840000000000 | 14.105530000000000 | 5.406000000000000  |

|    |                    |                    |                   |
|----|--------------------|--------------------|-------------------|
| C  | 5.592870000000000  | 12.245970000000000 | 8.365980000000000 |
| C  | 5.615640000000000  | 9.384060000000000  | 7.153690000000000 |
| Mn | 10.972630000000001 | 11.021340000000000 | 7.024560000000000 |
| O  | 10.997859999999999 | 10.867889999999999 | 5.356560000000000 |
| N  | 10.982510000000000 | 12.999210000000000 | 7.192120000000000 |
| N  | 10.976940000000001 | 9.084920000000000  | 7.517640000000000 |
| N  | 12.945090000000000 | 11.048180000000000 | 7.354340000000000 |
| N  | 9.006130000000001  | 11.029299999999999 | 7.320270000000000 |

Transition Metal: Mn; Functional Group: CH3; Adsorbate: OH

|   |                    |                    |                    |
|---|--------------------|--------------------|--------------------|
| H | 10.437490000000000 | 11.361610000000001 | 4.509080000000000  |
| H | 9.250529999999999  | 16.175460000000001 | 9.150280000000000  |
| H | 10.675850000000001 | 17.103909999999999 | 8.675890000000001  |
| H | 9.265850000000000  | 17.060730000000000 | 7.611760000000000  |
| H | 6.621100000000000  | 14.230240000000000 | 7.383060000000000  |
| H | 7.298520000000000  | 14.796960000000000 | 8.918900000000001  |
| H | 7.869780000000000  | 15.454150000000000 | 7.375600000000000  |
| H | 12.373490000000000 | 5.730670000000000  | 9.776270000000000  |
| H | 11.897290000000000 | 4.811510000000000  | 8.340710000000000  |
| H | 13.388620000000000 | 5.753600000000000  | 8.324750000000000  |
| H | 14.729419999999999 | 8.813040000000001  | 10.048069999999999 |
| H | 13.461770000000000 | 7.603520000000000  | 10.212100000000000 |
| H | 14.772130000000001 | 7.351840000000000  | 9.047359999999999  |
| H | 9.475330000000000  | 5.313320000000000  | 6.207520000000000  |
| H | 10.005870000000000 | 4.748380000000000  | 7.799980000000000  |
| H | 8.528029999999999  | 5.701500000000000  | 7.652900000000000  |
| H | 12.302920000000000 | 17.243770000000001 | 7.506990000000000  |
| H | 13.692710000000000 | 16.161290000000001 | 7.315080000000000  |
| H | 12.789289999999999 | 16.714469999999999 | 5.895110000000000  |
| H | 8.452819999999999  | 7.084030000000000  | 5.229710000000000  |
| H | 7.180100000000000  | 7.046870000000000  | 6.464070000000000  |
| H | 7.171400000000000  | 8.293830000000000  | 5.203940000000000  |
| H | 16.416519999999998 | 13.408030000000000 | 6.970330000000000  |
| H | 17.321719999999999 | 11.893549999999999 | 7.000380000000000  |
| H | 16.535080000000001 | 12.422140000000001 | 5.503790000000000  |
| H | 16.582239999999999 | 9.748710000000001  | 9.258520000000001  |
| H | 16.281800000000000 | 8.602259999999999  | 7.941140000000000  |
| H | 17.271740000000001 | 10.034000000000001 | 7.653580000000000  |
| H | 14.941670000000000 | 14.752370000000001 | 5.971400000000000  |
| H | 14.707970000000000 | 13.497650000000000 | 4.740820000000000  |
| H | 13.550730000000000 | 14.820480000000000 | 4.873520000000000  |
| H | 4.915570000000000  | 11.502780000000000 | 8.776890000000000  |
| H | 5.879110000000000  | 12.918910000000000 | 9.203139999999999  |
| H | 5.008620000000000  | 12.866930000000000 | 7.657650000000000  |
| H | 5.800160000000000  | 8.413550000000001  | 7.682440000000000  |
| H | 4.743760000000000  | 9.836000000000000  | 7.692970000000000  |
| H | 5.310070000000000  | 9.172810000000000  | 6.158960000000000  |
| C | 10.484010000000000 | 15.232120000000000 | 7.627790000000000  |
| C | 9.960160000000000  | 13.865420000000000 | 7.583270000000000  |
| C | 8.610830000000000  | 13.451499999999999 | 7.761220000000000  |
| C | 11.574769999999999 | 6.935920000000000  | 8.138249999999999  |
| C | 11.983079999999999 | 8.341609999999999  | 8.109680000000001  |
| C | 13.252760000000000 | 8.865869999999999  | 8.472200000000001  |
| C | 10.358180000000001 | 6.855060000000000  | 7.473140000000000  |
| C | 9.974110000000000  | 8.221480000000000  | 7.127150000000000  |
| C | 11.755660000000001 | 15.199940000000000 | 7.070570000000000  |
| C | 8.697609999999999  | 8.655960000000000  | 6.683500000000000  |
| C | 15.178360000000000 | 11.623849999999999 | 7.012110000000000  |
| C | 12.061150000000000 | 13.801740000000001 | 6.799380000000000  |
| C | 13.787110000000000 | 12.023370000000000 | 6.813450000000000  |
| C | 15.156560000000001 | 10.451140000000001 | 7.756330000000000  |
| C | 13.751180000000000 | 10.082269999999999 | 7.929660000000000  |
| C | 13.320440000000000 | 13.288760000000000 | 6.374930000000000  |
| C | 6.801540000000000  | 11.600490000000001 | 7.740490000000000  |
| C | 8.174960000000000  | 12.102029999999999 | 7.650980000000000  |
| C | 6.811200000000000  | 10.295650000000000 | 7.265730000000000  |
| C | 8.203080000000000  | 9.951960000000000  | 7.005140000000000  |
| C | 9.880620000000000  | 16.446950000000001 | 8.293410000000000  |
| C | 7.548080000000000  | 14.536720000000001 | 7.875910000000000  |
| C | 12.345920000000000 | 5.756470000000000  | 8.674250000000001  |
| C | 14.103640000000000 | 8.112349999999999  | 9.482950000000001  |
| C | 9.554280000000000  | 5.596890000000000  | 7.269610000000000  |
| C | 12.681880000000000 | 16.381699999999999 | 6.941010000000000  |
| C | 7.823880000000000  | 7.715590000000000  | 5.870200000000000  |
| C | 16.419129999999999 | 12.371880000000001 | 6.598280000000000  |
| C | 16.377120000000001 | 9.671760000000001  | 8.177420000000000  |

|    |                    |                    |                   |
|----|--------------------|--------------------|-------------------|
| C  | 14.181990000000001 | 14.140660000000000 | 5.458630000000000 |
| C  | 5.598090000000000  | 12.262790000000001 | 8.369410000000000 |
| C  | 5.613570000000000  | 9.383710000000001  | 7.197620000000000 |
| Mn | 10.983470000000001 | 11.023990000000000 | 6.975170000000000 |
| O  | 11.050200000000000 | 10.813200000000000 | 5.030100000000000 |
| N  | 10.982550000000000 | 13.023660000000000 | 7.164260000000000 |
| N  | 10.985390000000001 | 9.079800000000001  | 7.502880000000000 |
| N  | 12.962550000000000 | 11.052490000000001 | 7.345220000000000 |
| N  | 8.998060000000001  | 11.044910000000000 | 7.284050000000000 |

Transition Metal: Mn; Functional Group: CH3; Adsorbate: OOH

|    |                     |                     |                     |
|----|---------------------|---------------------|---------------------|
| Mn | 10.9726300000000001 | 11.0213400000000000 | 7.0245600000000000  |
| H  | 9.2568000000000000  | 16.1704700000000002 | 9.1437200000000000  |
| H  | 10.6840100000000001 | 17.0901099999999999 | 8.6577300000000001  |
| H  | 9.2680700000000000  | 17.0488100000000000 | 7.6006700000000000  |
| H  | 6.6225300000000000  | 14.2128599999999999 | 7.3908900000000000  |
| H  | 7.2952600000000000  | 14.7859400000000000 | 8.9271499999999999  |
| H  | 7.8710500000000000  | 15.4372600000000000 | 7.3822100000000000  |
| H  | 12.3626799999999999 | 5.7320900000000000  | 9.7842100000000000  |
| H  | 11.8813300000000000 | 4.8114400000000000  | 8.3510500000000001  |
| H  | 13.3781000000000000 | 5.7452700000000000  | 8.3317800000000000  |
| H  | 14.7347100000000000 | 8.8039700000000000  | 10.0453600000000001 |
| H  | 13.4684200000000000 | 7.5924500000000000  | 10.2127599999999999 |
| H  | 14.7706800000000000 | 7.3474700000000000  | 9.0370800000000000  |
| H  | 9.4906299999999999  | 5.3162100000000000  | 6.1870200000000000  |
| H  | 9.9997200000000000  | 4.7496800000000000  | 7.7858500000000000  |
| H  | 8.5247700000000000  | 5.7046100000000000  | 7.6203400000000000  |
| H  | 12.2787400000000001 | 17.2327499999999999 | 7.4308300000000000  |
| H  | 13.6737100000000000 | 16.1544999999999999 | 7.2511100000000000  |
| H  | 12.7568400000000000 | 16.6735599999999998 | 5.8265300000000000  |
| H  | 8.4774200000000000  | 7.0919100000000000  | 5.2049800000000000  |
| H  | 7.1814000000000000  | 7.0607200000000000  | 6.4150200000000000  |
| H  | 7.2058000000000000  | 8.3120200000000000  | 5.1584500000000000  |
| H  | 16.3923600000000000 | 13.3948900000000000 | 6.9080900000000000  |
| H  | 17.3025100000000002 | 11.8839600000000000 | 6.9580000000000000  |
| H  | 16.5071699999999999 | 12.3854799999999999 | 5.4569900000000000  |
| H  | 16.5724799999999999 | 9.7542500000000001  | 9.2504000000000001  |
| H  | 16.2823199999999999 | 8.6027000000000000  | 7.9345000000000000  |
| H  | 17.2619200000000000 | 10.0414300000000000 | 7.6459500000000000  |
| H  | 14.9025900000000000 | 14.7322799999999999 | 5.9028700000000000  |
| H  | 14.6713500000000000 | 13.4541299999999999 | 4.6968200000000000  |
| H  | 13.5032400000000000 | 14.7691400000000000 | 4.8137700000000000  |
| H  | 4.9119400000000000  | 11.4815500000000000 | 8.7685600000000001  |
| H  | 5.8677400000000000  | 12.9010700000000001 | 9.2028599999999999  |
| H  | 5.0044000000000000  | 12.8490699999999999 | 7.6524100000000000  |
| H  | 5.7878300000000000  | 8.4121000000000001  | 7.6409700000000000  |
| H  | 4.7382200000000000  | 9.8400400000000000  | 7.6316400000000000  |
| H  | 5.3334400000000000  | 9.1766900000000001  | 6.1086200000000000  |
| C  | 10.4780300000000000 | 15.2155900000000001 | 7.6183400000000000  |
| C  | 9.9577399999999999  | 13.8477000000000000 | 7.6012600000000000  |
| C  | 8.6100800000000000  | 13.4365000000000001 | 7.7806000000000000  |
| C  | 11.5691500000000000 | 6.9359500000000000  | 8.1417900000000000  |
| C  | 11.9768899999999999 | 8.3413200000000000  | 8.1223700000000000  |
| C  | 13.2470700000000001 | 8.8630600000000001  | 8.4804999999999999  |
| C  | 10.3590000000000000 | 6.8558900000000000  | 7.4648600000000000  |
| C  | 9.9743800000000000  | 8.2217500000000000  | 7.1233000000000000  |
| C  | 11.7390000000000001 | 15.1799500000000000 | 7.0396800000000000  |
| C  | 8.7046500000000001  | 8.6582100000000000  | 6.6673200000000000  |
| C  | 15.1605000000000001 | 11.6075900000000000 | 6.9854600000000000  |
| C  | 12.0471699999999999 | 13.7796200000000000 | 6.7863400000000000  |
| C  | 13.7693700000000000 | 12.0073600000000000 | 6.7969100000000000  |
| C  | 15.1448199999999999 | 10.4449400000000001 | 7.7452300000000000  |
| C  | 13.7415699999999999 | 10.0783299999999999 | 7.9357500000000000  |
| C  | 13.2970900000000001 | 13.2639900000000000 | 6.3446300000000000  |
| C  | 6.8012500000000000  | 11.5894200000000000 | 7.7401400000000000  |
| C  | 8.1761800000000000  | 12.0885000000000000 | 7.6741000000000000  |
| C  | 6.8139200000000000  | 10.2919400000000000 | 7.2484200000000000  |
| C  | 8.2078500000000001  | 9.9464799999999999  | 7.0052800000000000  |
| C  | 9.8832500000000000  | 16.4354400000000000 | 8.2822099999999999  |
| C  | 7.5472000000000000  | 14.5225300000000000 | 7.8856800000000000  |
| C  | 12.3353199999999999 | 5.7548700000000000  | 8.6819400000000001  |
| C  | 14.1052300000000001 | 8.1052100000000000  | 9.4818500000000000  |
| C  | 9.5558999999999999  | 5.5989900000000000  | 7.2502900000000000  |
| C  | 12.6590000000000001 | 16.3620100000000001 | 6.8796100000000000  |
| C  | 7.8407000000000000  | 7.7259900000000000  | 5.8347100000000000  |
| C  | 16.3965000000000000 | 12.3528500000000000 | 6.5527400000000000  |
| C  | 16.3693600000000000 | 9.6735000000000001  | 8.1692199999999999  |



|   |                    |                    |                   |
|---|--------------------|--------------------|-------------------|
| C | 14.144840000000000 | 14.105530000000000 | 5.406000000000000 |
| C | 5.592870000000000  | 12.245970000000000 | 8.365980000000000 |
| C | 5.615640000000000  | 9.384060000000000  | 7.153690000000000 |
| N | 10.982510000000000 | 12.999210000000000 | 7.192120000000000 |
| N | 10.976940000000001 | 9.084920000000000  | 7.517640000000000 |
| N | 12.945090000000000 | 11.048180000000000 | 7.354340000000000 |
| N | 9.006130000000001  | 11.029299999999999 | 7.320270000000000 |
| O | 11.002751173208889 | 10.838141663539274 | 5.033195873466999 |
| H | 10.171573371660894 | 10.562057754458092 | 3.356744539628560 |
| O | 9.773597773550016  | 10.592012928066991 | 4.246088520625584 |

Transition Metal: Mn; Functional Group: F; Adsorbate: Clean

|    |                    |                    |                    |
|----|--------------------|--------------------|--------------------|
| Mn | 0.000000000000000  | -0.000251796888862 | 0.002707265659100  |
| C  | 0.688224806937092  | 4.249569256518612  | -0.013277520353036 |
| C  | 1.112791825817610  | 2.880438176170226  | -0.001783429037472 |
| C  | 2.438817356344596  | 2.431680916899768  | 0.005214186513566  |
| C  | -0.688229181525621 | -4.249626561338014 | 0.003057951942570  |
| C  | -1.112809767930781 | -2.880452343758144 | -0.003466962191926 |
| C  | -2.438876303182951 | -2.431563462201243 | -0.005339698121082 |
| C  | 0.688229181525622  | -4.249626561338014 | 0.003057951942570  |
| C  | 1.112809767930788  | -2.880452343758144 | -0.003466962191926 |
| C  | -0.688224806937093 | 4.249569256518612  | -0.013277520353036 |
| C  | 2.438876303182954  | -2.431563462201243 | -0.005339698121082 |
| C  | -4.255182387904519 | 0.683253003751122  | 0.011989604048168  |
| C  | -1.112791825817606 | 2.880438176170226  | -0.001783429037472 |
| C  | -2.876088852521246 | 1.112730020485004  | 0.013389042103650  |
| C  | -4.255185760708748 | -0.683254792954965 | -0.006209415868064 |
| C  | -2.876062244025931 | -1.112535106866719 | -0.007422862793292 |
| C  | -2.438817356344586 | 2.431680916899768  | 0.005214186513566  |
| C  | 4.255182387904522  | 0.683253003751122  | 0.011989604048168  |
| C  | 2.876088852521254  | 1.112730020485004  | 0.013389042103650  |
| C  | 4.255185760708752  | -0.683254792954965 | -0.006209415868064 |
| C  | 2.876062244025934  | -1.112535106866719 | -0.007422862793292 |
| N  | 0.000000000000000  | 2.038518720267614  | 0.005254047158214  |
| N  | 0.000000000000000  | -2.038581071865035 | -0.007546750362456 |
| N  | -2.028137715606256 | 0.000098158343610  | 0.003815092223122  |
| N  | 2.028137715606254  | 0.000098158343610  | 0.003815092223122  |
| F  | 5.340690413110972  | -1.477223075173693 | -0.019572939334296 |
| F  | -5.340592438811822 | 1.477384252780666  | 0.019629209647448  |
| F  | -5.340690413110964 | -1.477223075173693 | -0.019572939334296 |
| F  | -1.474023331735900 | 5.341037560074872  | -0.007286894138868 |
| F  | 1.474023331735904  | 5.341037560074872  | -0.007286894138868 |
| F  | 5.340592438811834  | 1.477384252780666  | 0.019629209647448  |
| F  | -1.474290447352129 | -5.341061454097527 | -0.003548376874953 |
| F  | 1.474290447352128  | -5.341061454097527 | -0.003548376874953 |
| F  | -3.401515247807666 | 3.398285030314272  | -0.003487779075304 |
| F  | 3.401515247807668  | 3.398285030314272  | -0.003487779075304 |
| F  | -3.401341109870827 | -3.398392504704610 | 0.000938510082096  |
| F  | 3.401341109870830  | -3.398392504704610 | 0.000938510082096  |

Transition Metal: Mn; Functional Group: F; Adsorbate: O

|    |                    |                    |                    |
|----|--------------------|--------------------|--------------------|
| Mn | 0.000000000000000  | -0.000643290750705 | 0.266228261181810  |
| C  | 0.684988457622258  | 4.253290457843004  | -0.003537817130560 |
| C  | 1.109687397490298  | 2.874974619622840  | -0.007194537532018 |
| C  | 2.432534075461420  | 2.431028423789796  | 0.007289977542758  |
| C  | -0.684981925245463 | -4.255246585004270 | -0.005183575930658 |
| C  | -1.109723162829237 | -2.876977372376377 | -0.005960734721232 |
| C  | -2.432679983854499 | -2.433345469734910 | 0.005571066950478  |
| C  | 0.684981925245468  | -4.255246585004270 | -0.005183575930658 |
| C  | 1.109723162829230  | -2.876977372376377 | -0.005960734721232 |
| C  | -0.684988457622261 | 4.253290457843004  | -0.003537817130560 |
| C  | 2.432679983854506  | -2.433345469734910 | 0.005571066950478  |
| C  | -4.255651938781636 | 0.683930843659418  | 0.007169518810732  |
| C  | -1.109687397490291 | 2.874974619622840  | -0.007194537532018 |
| C  | -2.877201481744727 | 1.108453577572882  | 0.001097703496414  |
| C  | -4.255738735504037 | -0.686040814878414 | 0.006263477694762  |
| C  | -2.877361025817994 | -1.110768730498339 | -0.000152622900484 |
| C  | -2.432534075461422 | 2.431028423789796  | 0.007289977542758  |
| C  | 4.255651938781630  | 0.683930843659418  | 0.007169518810732  |
| C  | 2.877201481744726  | 1.108453577572882  | 0.001097703496414  |
| C  | 4.255738735504030  | -0.686040814878414 | 0.006263477694762  |
| C  | 2.877361025817990  | -1.110768730498339 | -0.000152622900484 |
| N  | 0.000000000000000  | 2.039002013297378  | -0.025948081935804 |
| N  | 0.000000000000000  | -2.040801684299641 | -0.021751625697419 |
| N  | -2.041339490181432 | -0.001201777684370 | -0.018306386576420 |
| N  | 2.041339490181430  | -0.001201777684370 | -0.018306386576420 |
| F  | 5.340541477415046  | -1.478687870507308 | -0.001390355161913 |
| F  | -5.340311809194386 | 1.476732405590350  | -0.000204191881231 |
| F  | -5.340541477415044 | -1.478687870507308 | -0.001390355161913 |
| F  | -1.477676822145352 | 5.338034503272442  | -0.007842316537616 |
| F  | 1.477676822145354  | 5.338034503272442  | -0.007842316537616 |
| F  | 5.340311809194383  | 1.476732405590350  | -0.000204191881231 |
| F  | -1.477652569811461 | -5.339962479571964 | -0.012335585561033 |
| F  | 1.477652569811464  | -5.339962479571964 | -0.012335585561033 |
| F  | -3.394574636829773 | 3.393677537250164  | 0.023534549236712  |
| F  | 3.394574636829776  | 3.393677537250164  | 0.023534549236712  |
| F  | -3.394663044531246 | -3.396193828256333 | 0.017156365378620  |
| F  | 3.394663044531242  | -3.396193828256333 | 0.017156365378620  |
| O  | 0.000000000000000  | 0.005428081575976  | 1.938392376096228  |

Transition Metal: Mn; Functional Group: F; Adsorbate: OH

|    |                    |                    |                    |
|----|--------------------|--------------------|--------------------|
| Mn | 0.000000000000000  | -0.025401491664304 | 0.348277197344202  |
| C  | 0.686848060080948  | 4.310044786053208  | -0.058084626464172 |
| C  | 1.108044602433900  | 2.928297565246696  | -0.038622678393556 |
| C  | 2.423983079059576  | 2.449345367301642  | -0.007400651801596 |
| C  | -0.686534151482736 | -4.302873675933434 | -0.057257617082115 |
| C  | -1.108933055984579 | -2.922124708727313 | -0.051667466907926 |
| C  | -2.425758385807406 | -2.448100977992983 | -0.012522749977640 |
| C  | 0.686534151482728  | -4.302873675933434 | -0.057257617082115 |
| C  | 1.108933055984572  | -2.922124708727313 | -0.051667466907926 |
| C  | -0.686848060080955 | 4.310044786053208  | -0.058084626464172 |
| C  | 2.425758385807400  | -2.448100977992983 | -0.012522749977640 |
| C  | -4.233274315755533 | 0.687119021481676  | 0.014242656022204  |
| C  | -1.108044602433903 | 2.928297565246696  | -0.038622678393556 |
| C  | -2.856542420760295 | 1.116743113065732  | 0.013553470270282  |
| C  | -4.235507122887388 | -0.684998055917337 | 0.015056676207312  |
| C  | -2.860224081500142 | -1.116757559193374 | 0.012344889723650  |
| C  | -2.423983079059589 | 2.449345367301642  | -0.007400651801596 |
| C  | 4.233274315755534  | 0.687119021481676  | 0.014242656022204  |
| C  | 2.856542420760304  | 1.116743113065732  | 0.013553470270282  |
| C  | 4.235507122887392  | -0.684998055917337 | 0.015056676207312  |
| C  | 2.860224081500144  | -1.116757559193374 | 0.012344889723650  |
| N  | 0.000000000000000  | 2.104125374642556  | -0.029141285676706 |
| N  | 0.000000000000000  | -2.098096737725584 | -0.056686186580510 |
| N  | -2.026142812792997 | -0.001750113281666 | 0.004312072037640  |
| N  | 2.026142812793008  | -0.001750113281666 | 0.004312072037640  |
| F  | 5.326799153803377  | -1.468900441817002 | -0.004474889054634 |
| F  | -5.322885714207517 | 1.473455616038426  | -0.005751724106425 |
| F  | -5.326799153803385 | -1.468900441817002 | -0.004474889054634 |
| F  | -1.479496788635068 | 5.396869058122245  | -0.061626609801429 |
| F  | 1.479496788635070  | 5.396869058122245  | -0.061626609801429 |
| F  | 5.322885714207514  | 1.473455616038426  | -0.005751724106425 |
| F  | -1.479510009296682 | -5.388221804434178 | -0.048892100984588 |
| F  | 1.479510009296684  | -5.388221804434178 | -0.048892100984588 |
| F  | -3.404097444374695 | 3.396397664454212  | -0.002328235837778 |
| F  | 3.404097444374704  | 3.396397664454212  | -0.002328235837778 |
| F  | -3.403185603983879 | -3.396962084284006 | -0.000710499290818 |
| F  | 3.403185603983886  | -3.396962084284006 | -0.000710499290818 |
| H  | 0.000000000000000  | 0.851414059299742  | 2.695795343334340  |
| O  | 0.000000000000000  | -0.010086744917250 | 2.241045102461210  |

Transition Metal: Mn; Functional Group: F; Adsorbate: OOH

|    |                    |                    |                    |
|----|--------------------|--------------------|--------------------|
| Mn | -0.004219738249578 | 0.001520848006840  | 0.239557039510254  |
| C  | 0.681853006873988  | 4.260788754609398  | -0.018122899515443 |
| C  | 1.108299980102416  | 2.881787857127482  | -0.009521732093837 |
| C  | 2.432105968904344  | 2.437346749454268  | -0.002630720239678 |
| C  | -0.688352296104199 | -4.258567291194552 | -0.018066627431786 |
| C  | -1.114303093317435 | -2.879324232961341 | -0.011359141897799 |
| C  | -2.437882635681547 | -2.433896888038596 | -0.007015066564470 |
| C  | 0.681863196847046  | -4.258455041797246 | -0.018386866208211 |
| C  | 1.107961661970580  | -2.879302049105551 | -0.010325690885619 |
| C  | -0.688295805110172 | 4.260887125172528  | -0.017743694688868 |
| C  | 2.431563051698980  | -2.434535070461177 | -0.002888958717944 |
| C  | -4.262266893029610 | 0.687659286817590  | -0.015275602741602 |
| C  | -1.114585053399967 | 2.881820655734224  | -0.010440187607937 |
| C  | -2.886397456531803 | 1.112692822068372  | -0.015214157545544 |
| C  | -4.262199340025063 | -0.685084125318287 | -0.015052470722028 |
| C  | -2.886195336776968 | -1.110019253526442 | -0.015477021785950 |
| C  | -2.438338246406122 | 2.436720483109896  | -0.006593308802572 |
| C  | 4.257768861588239  | 0.687735507154096  | -0.005308972024320 |
| C  | 2.881510917797730  | 1.113236510379982  | -0.005180557309224 |
| C  | 4.257651611486546  | -0.685211588083991 | -0.005033955047926 |
| C  | 2.881248264022392  | -1.110567952456563 | -0.005336277817270 |
| N  | -0.003359159082994 | 2.049279776516104  | -0.010034455446586 |
| N  | -0.003385791602666 | -2.046640699669744 | -0.011217792271129 |
| N  | -2.054191062494841 | 0.001453332320594  | -0.020471619084124 |
| N  | 2.050316105031164  | 0.001477955438868  | -0.010209950051574 |
| F  | 5.345478045987680  | -1.474472549426359 | -0.006895574552324 |
| F  | -5.349440228148666 | 1.477368803644698  | -0.014836544759952 |
| F  | -5.349698380953033 | -1.474545282637088 | -0.013282533493228 |
| F  | -1.480764976257753 | 5.346461355252709  | -0.028802224771386 |
| F  | 1.474619091235896  | 5.346254147974604  | -0.030567782128866 |
| F  | 5.345292753061436  | 1.477163616545218  | -0.008396650828995 |
| F  | -1.481433512367953 | -5.343770918303134 | -0.028344164655028 |
| F  | 1.475249568379532  | -5.343540589791239 | -0.030242917783113 |
| F  | -3.401716442710118 | 3.399988011260026  | -0.001476028098964 |
| F  | 3.395758703446398  | 3.400870142791942  | 0.001384691278368  |
| F  | -3.400840489727553 | -3.397538260515994 | -0.000821520360918 |
| F  | 3.394825904199940  | -3.398401884019780 | 0.002326786541626  |
| H  | -0.675539155461337 | -0.000988282929278 | 3.891229209269588  |
| O  | 0.188711940789558  | 0.002407552114468  | 2.208012672119198  |
| O  | -1.047523610757491 | -0.000038313148922 | 2.984782324298110  |

Transition Metal: Mn; Functional Group: H; Adsorbate: Clean

|    |                    |                    |                    |
|----|--------------------|--------------------|--------------------|
| Mn | 0.000000000000000  | -0.000256665832882 | 0.001559194741198  |
| C  | 0.690074908262702  | 4.238885217791569  | -0.008235771297656 |
| C  | 1.110692471169452  | 2.868077021011474  | -0.005237122625186 |
| C  | 2.444278194847208  | 2.434757746944662  | -0.001276850102578 |
| C  | -0.690128352715639 | -4.238653166911558 | -0.005557387694893 |
| C  | -1.110803192518055 | -2.867916866972095 | -0.000917354124548 |
| C  | -2.444443097715105 | -2.434653318883242 | 0.000163553252658  |
| C  | 0.690128352715634  | -4.238653166911558 | -0.005557387694893 |
| C  | 1.110803192518060  | -2.867916866972095 | -0.000917354124548 |
| C  | -0.690074908262702 | 4.238885217791569  | -0.008235771297656 |
| C  | 2.444443097715112  | -2.434653318883242 | 0.000163553252658  |
| C  | -4.244063216145095 | 0.682345530422344  | 0.005470835713402  |
| C  | -1.110692471169443 | 2.868077021011474  | -0.005237122625186 |
| C  | -2.857863458390472 | 1.111506065449546  | 0.003023743876926  |
| C  | -4.244272175490721 | -0.682283959542669 | 0.005635280853796  |
| C  | -2.858181585841010 | -1.111625285504164 | 0.003576251880926  |
| C  | -2.444278194847215 | 2.434757746944662  | -0.001276850102578 |
| C  | 4.244063216145094  | 0.682345530422344  | 0.005470835713402  |
| C  | 2.857863458390470  | 1.111506065449546  | 0.003023743876926  |
| C  | 4.244272175490726  | -0.682283959542669 | 0.005635280853796  |
| C  | 2.858181585841016  | -1.111625285504164 | 0.003576251880926  |
| N  | 0.000000000000000  | 2.027079971942764  | -0.004506951822718 |
| N  | 0.000000000000000  | -2.027157391576701 | 0.001664454892760  |
| N  | -2.010208564864246 | -0.000150006050926 | 0.002886001892466  |
| N  | 2.010208564864248  | -0.000150006050926 | 0.002886001892466  |
| H  | 5.095528945789288  | -1.360541698313561 | 0.005299113585172  |
| H  | -5.095089259581371 | 1.360802114062332  | 0.005101559041898  |
| H  | -5.095528945789283 | -1.360541698313561 | 0.005299113585172  |
| H  | -1.364544634040730 | 5.093011396101535  | -0.009175051261934 |
| H  | 1.364544634040724  | 5.093011396101535  | -0.009175051261934 |
| H  | 5.095089259581370  | 1.360802114062332  | 0.005101559041898  |
| H  | -1.364716653562581 | -5.092693341605582 | -0.008887053278336 |
| H  | 1.364716653562588  | -5.092693341605582 | -0.008887053278336 |
| H  | -3.218879116131799 | 3.204257403970874  | -0.001504410931454 |
| H  | 3.218879116131798  | 3.204257403970874  | -0.001504410931454 |
| H  | -3.218377790079813 | -3.204747809237023 | -0.002878687686520 |
| H  | 3.218377790079824  | -3.204747809237023 | -0.002878687686520 |

Transition Metal: Mn; Functional Group: H; Adsorbate: O

|    |                    |                    |                    |
|----|--------------------|--------------------|--------------------|
| Mn | 0.000000000000000  | -0.001345529363192 | 0.293607129507628  |
| C  | 0.684876897117038  | 4.243708702255150  | -0.017832371221374 |
| C  | 1.106681126442014  | 2.859700872798342  | 0.007887702542522  |
| C  | 2.435316114545620  | 2.434592019891694  | 0.014906647931428  |
| C  | -0.684846373348513 | -4.245386366307592 | -0.018311440178966 |
| C  | -1.106737922225381 | -2.861280223325821 | 0.004821517141104  |
| C  | -2.435365118201616 | -2.436061103026866 | 0.014517584553882  |
| C  | 0.684846373348514  | -4.245386366307592 | -0.018311440178966 |
| C  | 1.106737922225378  | -2.861280223325821 | 0.004821517141104  |
| C  | -0.684876897117039 | 4.243708702255150  | -0.017832371221374 |
| C  | 2.435365118201622  | -2.436061103026866 | 0.014517584553882  |
| C  | -4.244811208073296 | 0.684173434664608  | -0.005554719800390 |
| C  | -1.106681126442012 | 2.859700872798342  | 0.007887702542522  |
| C  | -2.860518076607477 | 1.105930490693288  | 0.012252645755958  |
| C  | -4.244803956877991 | -0.685475742741922 | -0.004863762837402 |
| C  | -2.860546389878355 | -1.107379827824985 | 0.012631388695336  |
| C  | -2.435316114545614 | 2.434592019891694  | 0.014906647931428  |
| C  | 4.244811208073304  | 0.684173434664608  | -0.005554719800390 |
| C  | 2.860518076607478  | 1.105930490693288  | 0.012252645755958  |
| C  | 4.244803956877988  | -0.685475742741922 | -0.004863762837402 |
| C  | 2.860546389878358  | -1.107379827824985 | 0.012631388695336  |
| N  | 0.000000000000000  | 2.024675221396462  | 0.012759360728584  |
| N  | 0.000000000000000  | -2.026537629759822 | 0.007400786430714  |
| N  | -2.025904922693794 | -0.000717550384230 | 0.013084103731600  |
| N  | 2.025904922693800  | -0.000717550384230 | 0.013084103731600  |
| H  | 5.097246563980428  | -1.361927255785044 | -0.019613149520477 |
| H  | -5.096992108342064 | 1.360973610449320  | -0.021408263492123 |
| H  | -5.097246563980427 | -1.361927255785044 | -0.019613149520477 |
| H  | -1.361496087289371 | 5.095992134592646  | -0.038345155292891 |
| H  | 1.361496087289366  | 5.095992134592646  | -0.038345155292891 |
| H  | 5.096992108342063  | 1.360973610449320  | -0.021408263492123 |
| H  | -1.361324384594102 | -5.097781167612091 | -0.035414722344957 |
| H  | 1.361324384594100  | -5.097781167612091 | -0.035414722344957 |
| H  | -3.207151628233312 | 3.206536308283014  | 0.011097216615950  |
| H  | 3.207151628233306  | 3.206536308283014  | 0.011097216615950  |
| H  | -3.207240591365849 | -3.207870298115264 | 0.013292816580318  |
| H  | 3.207240591365844  | -3.207870298115264 | 0.013292816580318  |
| O  | 0.000000000000000  | -0.005868139281763 | 1.968806645613480  |

Transition Metal: Mn; Functional Group: H; Adsorbate: OH

|    |                    |                    |                    |
|----|--------------------|--------------------|--------------------|
| Mn | 0.000000000000000  | 0.001248816638884  | 0.323438239428694  |
| C  | 0.685835156041520  | 4.254407395748069  | -0.047999479150224 |
| C  | 1.108487082213002  | 2.871591734365544  | -0.001470075830382 |
| C  | 2.438920371277262  | 2.441891644012002  | -0.005277559529072 |
| C  | -0.685428350521281 | -4.245812214192973 | -0.027774546623036 |
| C  | -1.107397291389155 | -2.861736931836067 | 0.007486353024570  |
| C  | -2.437795505716277 | -2.433008376793065 | 0.007553225678890  |
| C  | 0.685428350521278  | -4.245812214192973 | -0.027774546623036 |
| C  | 1.107397291389156  | -2.861736931836067 | 0.007486353024570  |
| C  | -0.685835156041517 | 4.254407395748069  | -0.047999479150224 |
| C  | 2.437795505716274  | -2.433008376793065 | 0.007553225678890  |
| C  | -4.251065729617023 | 0.688689855594608  | -0.035692695754193 |
| C  | -1.108487082212999 | 2.871591734365544  | -0.001470075830382 |
| C  | -2.866125559491756 | 1.111274227312668  | -0.003199144564242 |
| C  | -4.250591668764654 | -0.681476568604424 | -0.030877141797987 |
| C  | -2.865603138584163 | -1.103089260384689 | 0.003941847655646  |
| C  | -2.438920371277259 | 2.441891644012002  | -0.005277559529072 |
| C  | 4.251065729617028  | 0.688689855594608  | -0.035692695754193 |
| C  | 2.866125559491762  | 1.111274227312668  | -0.003199144564242 |
| C  | 4.250591668764650  | -0.681476568604424 | -0.030877141797987 |
| C  | 2.865603138584158  | -1.103089260384689 | 0.003941847655646  |
| N  | 0.000000000000000  | 2.041842054603320  | 0.029067029430216  |
| N  | 0.000000000000000  | -2.032832070643810 | 0.024485544594906  |
| N  | -2.036384785279232 | 0.004455734291536  | 0.017325815456104  |
| N  | 2.036384785279226  | 0.004455734291536  | 0.017325815456104  |
| H  | 5.103110076401324  | -1.357624608611026 | -0.051197223241747 |
| H  | -5.103683065565273 | 1.364706465943690  | -0.061102752326484 |
| H  | -5.103110076401332 | -1.357624608611026 | -0.051197223241747 |
| H  | -1.361013533293658 | 5.107308073077707  | -0.081568070199502 |
| H  | 1.361013533293662  | 5.107308073077707  | -0.081568070199502 |
| H  | 5.103683065565278  | 1.364706465943690  | -0.061102752326484 |
| H  | -1.361262405727722 | -5.098478427342194 | -0.052561384759009 |
| H  | 1.361262405727728  | -5.098478427342194 | -0.052561384759009 |
| H  | -3.211170189894045 | 3.213249697407476  | -0.027987520556898 |
| H  | 3.211170189894052  | 3.213249697407476  | -0.027987520556898 |
| H  | -3.209696901097033 | -3.204831283811629 | -0.004845484025998 |
| H  | 3.209696901097034  | -3.204831283811629 | -0.004845484025998 |
| H  | 0.000000000000000  | 0.778681441159684  | 2.767940412985692  |
| O  | 0.000000000000000  | -0.054854554112294 | 2.265190446647024  |



Transition Metal: Mn; Functional Group: H; Adsorbate: OOH

|    |                    |                    |                    |
|----|--------------------|--------------------|--------------------|
| Mn | -0.018567582902790 | 0.013699242687828  | 0.266422895910392  |
| C  | 0.670604495427406  | 4.262531963274060  | -0.066996417318446 |
| C  | 1.092820833120014  | 2.877653413957180  | -0.021444985545272 |
| C  | 2.421849297960716  | 2.450915739025548  | -0.013011188887664 |
| C  | -0.700950781491805 | -4.238569522441480 | -0.018971034860066 |
| C  | -1.123597253433562 | -2.853054173936489 | -0.000578295369584 |
| C  | -2.452633285932446 | -2.425719134272427 | -0.018157643891424 |
| C  | 0.668584040796746  | -4.238747298721632 | -0.008652551146653 |
| C  | 1.091400025623658  | -2.853624924443093 | 0.017711237638176  |
| C  | -0.698927047047441 | 4.263103463633234  | -0.071932978009553 |
| C  | 2.420648644943736  | -2.427484190730386 | 0.025175938523940  |
| C  | -4.260756800805538 | 0.698942260803542  | -0.091419222004866 |
| C  | -1.122275090301311 | 2.878317746007790  | -0.031963274091846 |
| C  | -2.879291142829103 | 1.120769183425946  | -0.044812721119840 |
| C  | -4.261110211101167 | -0.672968696773339 | -0.084890167578830 |
| C  | -2.879799868038088 | -1.094989097342463 | -0.034248158160342 |
| C  | -2.451494230299534 | 2.451431002729240  | -0.042889244986808 |
| C  | 4.232185720260023  | 0.697162459105462  | -0.021609244202878 |
| C  | 2.850135998050672  | 1.120076897354338  | 0.000843027132592  |
| C  | 4.231977730935804  | -0.674928235092562 | -0.009417859818413 |
| C  | 2.849682169059166  | -1.096782378696140 | 0.019495503873380  |
| N  | -0.015309734969510 | 2.047119649035980  | -0.000649832610326 |
| N  | -0.016296671620380 | -2.022183802634483 | 0.021703616794758  |
| N  | -2.048420961557948 | 0.012771149513196  | -0.013795396450568 |
| N  | 2.019358402568246  | 0.011972550195214  | 0.022855056561174  |
| H  | 5.085164958961474  | -1.350459696119167 | -0.023668451959505 |
| H  | -5.113090104524769 | 1.374715658444772  | -0.127502285776053 |
| H  | -5.113929323969501 | -1.348475359668580 | -0.113456995822368 |
| H  | -1.374943188776957 | 5.115347741392780  | -0.106565502160308 |
| H  | 1.347466393611486  | 5.114257595878082  | -0.096814132789287 |
| H  | 5.085438450378714  | 1.372146086459478  | -0.048602736081790 |
| H  | -1.377403964529989 | -5.090922499168837 | -0.041132199217568 |
| H  | 1.344917636259838  | -5.091335020580253 | -0.020923249070556 |
| H  | -3.223456387869771 | 3.222979225673960  | -0.067167354607748 |
| H  | 3.194136223784652  | 3.222211810727806  | -0.030374807544830 |
| H  | -3.224894070960406 | -3.197257499197409 | -0.033100799179856 |
| H  | 3.192626751992696  | -3.199431643997695 | 0.023301952950144  |
| H  | -0.705404329075819 | -0.007906855048342 | 3.933894126022214  |
| O  | 0.152850148777336  | 0.019663709921554  | 2.248004901171028  |
| O  | -1.086295890474492 | 0.002471479617996  | 3.032030473684916  |

## Transition Metal: Mn; Functional Group: NH2; Adsorbate: Clean

|    |                    |                    |                    |
|----|--------------------|--------------------|--------------------|
| Mn | 0.033526926437866  | -0.025436544779520 | -0.049104346744372 |
| C  | 0.832473594583166  | 4.141981154886626  | -0.518060349654949 |
| C  | 1.205448966343430  | 2.753891402157442  | -0.498903314790457 |
| C  | 2.527509274266062  | 2.244033635079086  | -0.625699378947296 |
| C  | -0.710338581552417 | -4.194642738757690 | -0.450261429394779 |
| C  | -1.114738599879562 | -2.815753414489134 | -0.411979245273820 |
| C  | -2.420765827063395 | -2.319481637122163 | -0.605768306036715 |
| C  | 0.632802960993958  | -4.240584251947970 | -0.083071296600853 |
| C  | 1.033846961779818  | -2.890481623618143 | 0.211831775557678  |
| C  | -0.492942048287087 | 4.219050482687984  | -0.097181810451417 |
| C  | 2.326930295224258  | -2.486359317829983 | 0.637676897716616  |
| C  | -4.151636499148609 | 0.725041542659410  | 0.394683189141576  |
| C  | -0.962919132911889 | 2.867931899760664  | 0.073779512419594  |
| C  | -2.768939143908501 | 1.155821720630792  | 0.301155805851992  |
| C  | -4.187168757450179 | -0.616548357526373 | 0.054016980510492  |
| C  | -2.828419979661977 | -1.023246109228008 | -0.217283456362402 |
| C  | -2.310176682872996 | 2.491150526372656  | 0.312462813167500  |
| C  | 4.244199509478724  | 0.571602385358862  | 0.198747725758416  |
| C  | 2.903136013975254  | 0.952964590665642  | -0.213364202417022 |
| C  | 4.166744936290248  | -0.721170791238912 | 0.688394983201028  |
| C  | 2.797979893553608  | -1.168260284179460 | 0.511749066444230  |
| N  | 0.102367186670090  | 1.984803613896142  | -0.135820350685261 |
| N  | -0.035006053725880 | -2.023690191935216 | -0.002738465994600 |
| N  | -1.962119215623112 | 0.051813979108630  | 0.003815409097748  |
| N  | 2.025560808813724  | -0.109985080305833 | 0.012705692776282  |
| N  | 5.262172348326266  | -1.503899308178113 | 1.203905020547496  |
| N  | -5.278646186179172 | 1.546784013881878  | 0.745669812263728  |
| N  | -5.346418031950266 | -1.422140684856867 | -0.006740165261628 |
| N  | -1.216721876695964 | 5.419290729244290  | 0.068814222416182  |
| N  | 1.690235861678154  | 5.255405584890624  | -0.840931952359806 |
| N  | 5.403814177087241  | 1.351737804550044  | 0.133547038069408  |
| N  | -1.484010784856093 | -5.334076841501865 | -0.792614251395591 |
| N  | 1.393720834595952  | -5.433775198249762 | -0.014682457923058 |
| N  | -3.254448491347887 | 3.536526106560446  | 0.508844402341592  |
| N  | 3.566370731723572  | 3.124547131825334  | -1.043651226582934 |
| N  | -3.407305276983791 | -3.209375088058476 | -1.126438687999539 |
| N  | 3.210271365122630  | -3.523447976293109 | 1.071976237412178  |
| H  | -2.436707802737896 | -5.279605174247683 | -0.423932941964548 |
| H  | -1.046461621815343 | -6.181923717086553 | -0.421137631148717 |
| H  | -3.002640211128714 | -3.877995272404803 | -1.783889293766070 |
| H  | -4.165038202944677 | -2.707531979546204 | -1.591903791888111 |
| H  | -5.499310927827105 | 1.520603139412052  | 1.746924789015812  |
| H  | -6.120015293619947 | 1.290632633609278  | 0.224117688585404  |
| H  | -1.861796575907295 | 5.383548993591024  | 0.860598524542716  |
| H  | 1.224191916230880  | 5.918854825894262  | -1.465943926332422 |
| H  | 1.994217730542610  | 5.772505686718857  | -0.008371252769962 |
| H  | 3.194801887192288  | 4.050984340949798  | -1.286436961745025 |
| H  | 4.112974920638542  | 2.734970193706784  | -1.813723542657868 |
| H  | 5.201870794212068  | 2.351837422294052  | 0.045882595060622  |
| H  | 6.071264402165220  | 1.146803049506202  | 0.878047991649386  |
| H  | 6.103454617870186  | -1.391645284433455 | 0.629554797143326  |
| H  | 5.508650954879823  | -1.241110671997120 | 2.164502335184360  |
| H  | 4.148160766035614  | -3.145124892408734 | 1.256635287529918  |
| H  | 2.855455817767146  | -3.996195311417225 | 1.907515093298140  |
| H  | 2.384626305530010  | -5.211126448471076 | 0.130237626900558  |
| H  | 1.293377924863460  | -5.992171681438093 | -0.866765145891847 |
| H  | -5.171893000645786 | -2.394315868453234 | 0.255655765870356  |
| H  | -6.099491837239633 | -1.043647920279259 | 0.571714626136276  |
| H  | -4.212925492851785 | 3.165944748046836  | 0.521852197489368  |
| H  | -3.169061681966422 | 4.268262267480374  | -0.200098987770755 |
| H  | -0.593838725208812 | 6.224519573834623  | 0.159627051771666  |

Transition Metal: Mn; Functional Group: NH2; Adsorbate: O

|    |                    |                    |                    |
|----|--------------------|--------------------|--------------------|
| Mn | 0.023387832749382  | -0.023693122144284 | 0.313371009212144  |
| C  | 0.787039719486000  | 4.119910235744786  | -0.535302507978166 |
| C  | 1.166788526920632  | 2.725972342924058  | -0.486529468038679 |
| C  | 2.486633319368442  | 2.219499802312932  | -0.646081211656483 |
| C  | -0.692471785572753 | -4.182718545615566 | -0.460587097283398 |
| C  | -1.096262507215489 | -2.795667101261511 | -0.419812033260659 |
| C  | -2.382760423050005 | -2.291340755111012 | -0.694356630389674 |
| C  | 0.623455860679744  | -4.238946541041692 | -0.029104205127076 |
| C  | 1.012197866036870  | -2.880556980284211 | 0.302181291990848  |
| C  | -0.501273854745218 | 4.204402090317602  | -0.022648635818964 |
| C  | 2.298099749666930  | -2.474382797418031 | 0.737922252904360  |
| C  | -4.154628257129190 | 0.715624190820188  | 0.360937353350654  |
| C  | -0.955512440264009 | 2.853171935108398  | 0.214289689394080  |
| C  | -2.773341292924087 | 1.137393213286742  | 0.350539452263776  |
| C  | -4.184100839741552 | -0.605321448103815 | -0.072502086054544 |
| C  | -2.814276178148191 | -0.994133948718655 | -0.309982999422274 |
| C  | -2.299483017081837 | 2.471389853980946  | 0.483960745603310  |
| C  | 4.229376251175680  | 0.564892848237908  | 0.176349542152684  |
| C  | 2.882165212598164  | 0.931853741680370  | -0.222242796746720 |
| C  | 4.155774331432028  | -0.718329825703272 | 0.704474284107240  |
| C  | 2.788711179926060  | -1.160783854674158 | 0.557094959130220  |
| N  | 0.090093169341686  | 1.975507203661146  | -0.040759738178441 |
| N  | -0.040190724056490 | -2.020133174164886 | 0.050824497417304  |
| N  | -1.971922148275532 | 0.067583434952658  | -0.016868162546692 |
| N  | 2.024148434681486  | -0.130923890980444 | 0.023552929294710  |
| N  | 5.247775099540034  | -1.487551620544693 | 1.244891989177834  |
| N  | -5.293684096339469 | 1.525427619123194  | 0.687461947379112  |
| N  | -5.347643988653253 | -1.386572188872801 | -0.235984750421355 |
| N  | -1.245965078508373 | 5.398561978519339  | 0.153920827210842  |
| N  | 1.618693627654302  | 5.218693645829676  | -0.964909628976596 |
| N  | 5.391472281725777  | 1.337728920409978  | 0.067821309751782  |
| N  | -1.484902935803142 | -5.294886029302099 | -0.882244934651098 |
| N  | 1.405566726377018  | -5.415174583432481 | 0.043906282107020  |
| N  | -3.228376094326148 | 3.469923701274510  | 0.796276821173200  |
| N  | 3.510098507857292  | 3.095916804488726  | -1.089170032347351 |
| N  | -3.351461381479854 | -3.152510163218857 | -1.277323676574817 |
| N  | 3.168531919187174  | -3.490878003280443 | 1.213248386763100  |
| H  | -2.357959309788448 | -5.351776497515903 | -0.347276049132542 |
| H  | -0.982071160147903 | -6.169054113781369 | -0.708522576957364 |
| H  | -2.925504070312147 | -3.944233576271074 | -1.764050644625019 |
| H  | -3.977283483722978 | -2.652962802286641 | -1.910673038367051 |
| H  | -5.521099932811538 | 1.506435821579154  | 1.687241279138278  |
| H  | -6.125081148584732 | 1.244045620348046  | 0.162514337748942  |
| H  | -1.561449344564483 | 5.518845031717614  | 1.120655865154350  |
| H  | 1.204170642288156  | 5.728521928437008  | -1.750481350499992 |
| H  | 1.796123574379816  | 5.892161731836966  | -0.212189581572105 |
| H  | 3.141230072015878  | 4.025588358093272  | -1.324087690541212 |
| H  | 4.068047396417998  | 2.702237530657460  | -1.848146498879068 |
| H  | 5.190302502322957  | 2.338810550646560  | -0.008569199941798 |
| H  | 6.074282207841870  | 1.135551990547390  | 0.799771301411472  |
| H  | 6.090256288441608  | -1.402621067669600 | 0.667914039515172  |
| H  | 5.492801523907466  | -1.189190603350877 | 2.195397021166116  |
| H  | 4.105306718925844  | -3.118582562722580 | 1.411022484295608  |
| H  | 2.788013195693554  | -3.980355253460864 | 2.025469365093456  |
| H  | 2.388058173074078  | -5.182021871364437 | 0.222793443151598  |
| H  | 1.340365845953990  | -5.975246558753531 | -0.809526624860176 |
| H  | -5.165299430910782 | -2.388808118227264 | -0.150169553371412 |
| H  | -6.087588681043201 | -1.109841911952490 | 0.412885702113044  |
| H  | -4.199247699214508 | 3.155472944876844  | 0.683443682750262  |
| H  | -3.041504249098413 | 4.364725718835480  | 0.340466071218440  |
| H  | -0.693499350399513 | 6.218538557370033  | -0.108937544851516 |
| O  | 0.007135287124650  | 0.038037541309778  | 1.995392215604528  |

Transition Metal: Mn; Functional Group: NH2; Adsorbate: OH

|    |                    |                    |                    |
|----|--------------------|--------------------|--------------------|
| Mn | 0.013988176292740  | -0.023806281883921 | 0.350460497054744  |
| C  | 0.792745628326770  | 4.151301050194734  | -0.520784139038806 |
| C  | 1.174826417246396  | 2.760680365985844  | -0.437294140607314 |
| C  | 2.496186032345954  | 2.243720652126530  | -0.576548027317763 |
| C  | -0.707946626842759 | -4.206034407442608 | -0.460441379368760 |
| C  | -1.118546108385992 | -2.823140178828393 | -0.375611124878624 |
| C  | -2.409689662788178 | -2.312339342319447 | -0.620103901034796 |
| C  | 0.625462561832784  | -4.258962056043625 | -0.081496998035632 |
| C  | 1.012726842306460  | -2.904484831649370 | 0.269236830964376  |
| C  | -0.525253270951133 | 4.234117805843836  | -0.085104051482286 |
| C  | 2.310149650572306  | -2.499738101351735 | 0.676455451825160  |
| C  | -4.170310477203907 | 0.723291680676248  | 0.376260091759140  |
| C  | -0.979442576845408 | 2.883721147273196  | 0.156818021683002  |
| C  | -2.791917246516352 | 1.151448789693576  | 0.327618644965926  |
| C  | -4.198601017641977 | -0.617598896501335 | 0.007849855824172  |
| C  | -2.831423631824631 | -1.008669530955753 | -0.239703474681338 |
| C  | -2.328647185482488 | 2.496136275605144  | 0.393239544706290  |
| C  | 4.228373122199958  | 0.569560596716622  | 0.222522815440774  |
| C  | 2.881439672066300  | 0.946889403586252  | -0.168893041259700 |
| C  | 4.158081970125462  | -0.733586719207931 | 0.700208380747510  |
| C  | 2.791707275632128  | -1.175858989417030 | 0.537261093392102  |
| N  | 0.090243989535686  | 2.014324789012182  | -0.016160370558463 |
| N  | -0.060715624647973 | -2.055048620086673 | 0.091371598307844  |
| N  | -1.990480098324092 | 0.067586196612556  | -0.001804412441550 |
| N  | 2.025842854563832  | -0.127551444715802 | 0.041036546708674  |
| N  | 5.258689371876306  | -1.518054476435697 | 1.198836247937420  |
| N  | -5.312389179755506 | 1.538028808965778  | 0.672078445463218  |
| N  | -5.361356833719565 | -1.411435852985218 | -0.084110404371621 |
| N  | -1.281145757674661 | 5.427572186495028  | 0.026675059151026  |
| N  | 1.640460022424100  | 5.251379741397834  | -0.913596662381551 |
| N  | 5.388639054546857  | 1.348983172532878  | 0.153504592729890  |
| N  | -1.506036517072310 | -5.317937670201189 | -0.867077578230610 |
| N  | 1.415977154545974  | -5.431204498608789 | -0.060181417185198 |
| N  | -3.276125177500223 | 3.504854440332080  | 0.620721623749678  |
| N  | 3.529619751780824  | 3.118508675486004  | -1.006573858277214 |
| N  | -3.392922549139726 | -3.168677944036933 | -1.188734776440533 |
| N  | 3.197294774533596  | -3.528712098859003 | 1.096940667245832  |
| H  | -2.366038237331129 | -5.380531640349908 | -0.312393067222938 |
| H  | -0.995246362795164 | -6.191059430777877 | -0.711888015174598 |
| H  | -2.977376415898402 | -3.963196253226286 | -1.680382705951750 |
| H  | -4.016582300859362 | -2.665113816960986 | -1.821425076624209 |
| H  | -5.496651814580790 | 1.620062571771076  | 1.677374429257844  |
| H  | -6.157015506910213 | 1.184934774733284  | 0.216288972990936  |
| H  | -1.687903763886062 | 5.547657759532166  | 0.958593408467462  |
| H  | 1.234394485304450  | 5.796172475815364  | -1.679605989350293 |
| H  | 1.832195681004664  | 5.894140100916117  | -0.137658789286519 |
| H  | 3.163321348890064  | 4.049437268592098  | -1.241110667499477 |
| H  | 4.081237303398148  | 2.728666691318078  | -1.772491322900073 |
| H  | 5.186234231469927  | 2.349782446660446  | 0.078214450601192  |
| H  | 6.058248326935239  | 1.140647555350568  | 0.895457693804104  |
| H  | 6.104078179180712  | -1.372975350420706 | 0.638374515348156  |
| H  | 5.488530933140659  | -1.287274341838671 | 2.171653974107354  |
| H  | 4.139895935521838  | -3.159631101698029 | 1.272156171625136  |
| H  | 2.846369704994716  | -4.029396751762649 | 1.916497683002168  |
| H  | 2.400434231288288  | -5.193945420015442 | 0.104117824342758  |
| H  | 1.336711207803122  | -5.965246493452907 | -0.929135603609843 |
| H  | -5.160704692061584 | -2.411577541908684 | -0.019157770880784 |
| H  | -6.060141750651615 | -1.149952072173917 | 0.614771651405214  |
| H  | -4.240709838813752 | 3.174828883260722  | 0.500061938700774  |
| H  | -3.086846683772379 | 4.368674722185212  | 0.109826328641792  |
| H  | -0.707496664331785 | 6.247460159249838  | -0.185739559916582 |
| H  | 0.454572983363572  | 0.759280369495672  | 2.732826927306124  |
| O  | -0.022757159961348 | 0.021813002727966  | 2.313171990443442  |

Transition Metal: Mn; Functional Group: NH2; Adsorbate: OOH

|    |                    |                    |                    |
|----|--------------------|--------------------|--------------------|
| Mn | 0.010038596061370  | -0.020307013935913 | 0.301437538610876  |
| C  | 0.790810036363518  | 4.145846358741451  | -0.532317215801573 |
| C  | 1.170819383897126  | 2.753450221476326  | -0.455751695825040 |
| C  | 2.493777346437754  | 2.241701332988370  | -0.585388843388344 |
| C  | -0.707379478602110 | -4.201554122595518 | -0.463561424682300 |
| C  | -1.119237005049062 | -2.818415480360429 | -0.383694063999904 |
| C  | -2.410855021812598 | -2.313278584709636 | -0.628911137118514 |
| C  | 0.623455286796818  | -4.254512893944259 | -0.080324269482418 |
| C  | 1.011149886710896  | -2.899373055010223 | 0.268492243829500  |
| C  | -0.523661500553143 | 4.229101673199772  | -0.090882397519149 |
| C  | 2.305888385450602  | -2.497808488308230 | 0.679096118279940  |
| C  | -4.167044863911713 | 0.723763427767428  | 0.367123274429150  |
| C  | -0.980261874231200 | 2.878337744457626  | 0.145338253427842  |
| C  | -2.791558083105926 | 1.151509413094460  | 0.317488388651946  |
| C  | -4.196774693715835 | -0.617774157248434 | -0.002337566101940 |
| C  | -2.832608566285369 | -1.009414889478531 | -0.250944383582961 |
| C  | -2.327961370877272 | 2.495076905467840  | 0.388100368629672  |
| C  | 4.223782563474278  | 0.570270556169242  | 0.221098350061912  |
| C  | 2.878704826806908  | 0.947919319434678  | -0.171347701401089 |
| C  | 4.151753177457594  | -0.731439133721942 | 0.703787563735888  |
| C  | 2.785753832155414  | -1.172646978574850 | 0.544379399495974  |
| N  | 0.084148139267630  | 2.006149354988986  | -0.041124577080836 |
| N  | -0.061224838202829 | -2.046457264530595 | 0.083241384704790  |
| N  | -1.989497410581681 | 0.066268467670722  | -0.011303458701803 |
| N  | 2.020815612362056  | -0.123700315103235 | 0.046396364037062  |
| N  | 5.252356121605968  | -1.512877096257387 | 1.207382943527826  |
| N  | -5.306769766707225 | 1.535711799108052  | 0.675657574780220  |
| N  | -5.360132874935168 | -1.410804009713925 | -0.087428272058446 |
| N  | -1.278910138683063 | 5.421944869601084  | 0.030304451341394  |
| N  | 1.641141363455598  | 5.246696676963538  | -0.917024847944724 |
| N  | 5.384856002031784  | 1.347933394657268  | 0.152293084470010  |
| N  | -1.506512637273389 | -5.313497848664035 | -0.870163593287199 |
| N  | 1.413800518289332  | -5.426792211800491 | -0.052907843095760 |
| N  | -3.272817580417204 | 3.503891582227072  | 0.624525064305776  |
| N  | 3.529606662059864  | 3.117510288081974  | -1.008950515247886 |
| N  | -3.396050563725705 | -3.172951331437108 | -1.192315227871788 |
| N  | 3.196297664324256  | -3.527795835217518 | 1.094804859875732  |
| H  | -2.364296297681715 | -5.374911175014931 | -0.311367653820902 |
| H  | -0.995358798764862 | -6.186431959201212 | -0.714533065278612 |
| H  | -2.979772857365862 | -3.965683910131077 | -1.686599921424268 |
| H  | -4.021774909691834 | -2.670410086526946 | -1.824020292201585 |
| H  | -5.480365338004509 | 1.612955280361050  | 1.683252381791480  |
| H  | -6.155152981082077 | 1.182838317274960  | 0.227038801259546  |
| H  | -1.679089774819037 | 5.536107706685440  | 0.965896313696696  |
| H  | 1.242232590980938  | 5.791885141502783  | -1.686435618665808 |
| H  | 1.824562579567784  | 5.888386543862944  | -0.138326046198486 |
| H  | 3.164197851801020  | 4.049100114527485  | -1.242884123622954 |
| H  | 4.082221645897846  | 2.728805952728088  | -1.774842016936727 |
| H  | 5.180977077150271  | 2.348782022870462  | 0.077131312424430  |
| H  | 6.052371058588139  | 1.140091542447378  | 0.896431389802588  |
| H  | 6.097509999184359  | -1.370198553220835 | 0.645943720602990  |
| H  | 5.482353590783098  | -1.274117172733330 | 2.178235741322848  |
| H  | 4.138344558503338  | -3.156362467365216 | 1.268665590056418  |
| H  | 2.850590339285670  | -4.028475201984634 | 1.916765010460076  |
| H  | 2.399140521379858  | -5.189092047366204 | 0.106064520903172  |
| H  | 1.330189973388970  | -5.969157933794859 | -0.916237370791329 |
| H  | -5.159217219307429 | -2.410569378952271 | -0.016026171006814 |
| H  | -6.055506377243487 | -1.144220387788867 | 0.612867911751306  |
| H  | -4.238679660034608 | 3.175201920016072  | 0.510347771750244  |
| H  | -3.086545055596645 | 4.368137610061788  | 0.112808221143964  |
| H  | -0.705506633268719 | 6.242537235179776  | -0.180307305600540 |
| H  | -0.689571220137804 | -0.008120746519012 | 3.981044904520306  |
| O  | 0.171500000955042  | 0.075876949490614  | 2.292636446380782  |
| O  | -1.075459554101649 | -0.048580625597000 | 3.083387582498522  |

Transition Metal: Mn; Functional Group: OH; Adsorbate: Clean

|    |                    |                    |                   |
|----|--------------------|--------------------|-------------------|
| H  | 9.363239999999999  | 16.813980000000001 | 8.219110000000001 |
| H  | 7.982940000000000  | 15.232139999999999 | 7.118080000000000 |
| H  | 12.401710000000000 | 5.371780000000000  | 6.477380000000000 |
| H  | 14.036160000000001 | 6.768150000000000  | 7.417950000000000 |
| H  | 10.130610000000001 | 4.876690000000000  | 8.022770000000000 |
| H  | 11.957990000000001 | 17.130700000000001 | 7.573940000000000 |
| H  | 6.741660000000000  | 7.986120000000000  | 8.486490000000000 |
| H  | 17.108329999999999 | 11.970570000000000 | 8.345760000000000 |
| H  | 16.079219999999999 | 8.634040000000001  | 7.679210000000000 |
| H  | 15.246980000000001 | 14.050369999999999 | 8.511220000000000 |
| H  | 5.919580000000000  | 13.365080000000001 | 7.425820000000000 |
| H  | 4.878680000000000  | 10.047860000000000 | 8.157389999999999 |
| C  | 10.327010000000000 | 15.228730000000001 | 7.597220000000000 |
| C  | 9.909179999999999  | 13.854559999999999 | 7.595670000000000 |
| C  | 8.589160000000000  | 13.418080000000000 | 7.461050000000000 |
| C  | 11.658310000000000 | 6.801560000000000  | 7.587130000000000 |
| C  | 12.082640000000000 | 8.174930000000000  | 7.608880000000000 |
| C  | 13.412050000000001 | 8.604240000000001  | 7.548360000000000 |
| C  | 10.320589999999999 | 6.763790000000000  | 7.909700000000000 |
| C  | 9.888750000000000  | 8.138760000000000  | 8.038890000000000 |
| C  | 11.682570000000000 | 15.264889999999999 | 7.832340000000000 |
| C  | 8.563459999999999  | 8.570650000000001  | 8.217990000000000 |
| C  | 15.205859999999999 | 11.668580000000000 | 8.188219999999999 |
| C  | 12.113099999999999 | 13.892329999999999 | 7.982130000000000 |
| C  | 13.846410000000001 | 12.117430000000001 | 8.134740000000001 |
| C  | 15.219030000000000 | 10.313680000000000 | 7.919410000000000 |
| C  | 13.850030000000000 | 9.922359999999999  | 7.746370000000000 |
| C  | 13.431229999999999 | 13.464829999999999 | 8.203419999999999 |
| C  | 6.778140000000000  | 11.699930000000000 | 7.762030000000000 |
| C  | 8.151669999999999  | 12.098789999999999 | 7.658240000000000 |
| C  | 6.784960000000000  | 10.351330000000001 | 8.061620000000000 |
| C  | 8.147390000000000  | 9.911960000000001  | 8.094690000000000 |
| Mn | 11.000439999999999 | 11.016340000000000 | 7.856110000000000 |
| O  | 9.488040000000000  | 16.340080000000000 | 7.373490000000000 |
| O  | 7.576020000000000  | 14.338390000000000 | 7.178500000000000 |
| O  | 12.493840000000001 | 5.678680000000000  | 7.400630000000000 |
| O  | 14.432760000000000 | 7.667490000000000  | 7.365620000000000 |
| O  | 9.536619999999999  | 5.652340000000000  | 8.055809999999999 |
| O  | 12.480230000000001 | 16.375699999999998 | 7.908890000000000 |
| O  | 7.636080000000000  | 7.587000000000000  | 8.461020000000000 |
| O  | 16.289429999999999 | 12.491860000000001 | 8.440650000000000 |
| O  | 16.361860000000000 | 9.556030000000000  | 7.861190000000000 |
| O  | 14.354699999999999 | 14.450930000000000 | 8.454340000000000 |
| O  | 5.635770000000000  | 12.452070000000001 | 7.646320000000000 |
| O  | 5.694480000000000  | 9.528370000000001  | 8.283870000000000 |
| N  | 11.014049999999999 | 13.030370000000000 | 7.825990000000000 |
| N  | 10.981890000000000 | 8.997760000000000  | 7.855760000000000 |
| N  | 13.010109999999999 | 11.028260000000000 | 7.880010000000000 |
| N  | 8.991040000000000  | 11.004379999999999 | 7.860440000000000 |

Transition Metal: Mn; Functional Group: OH; Adsorbate: O

|    |                    |                    |                   |
|----|--------------------|--------------------|-------------------|
| H  | 9.393170000000000  | 16.846129999999999 | 7.391180000000000 |
| H  | 8.011830000000000  | 15.201560000000001 | 6.354750000000000 |
| H  | 12.353619999999999 | 5.417270000000000  | 5.687850000000000 |
| H  | 14.013199999999999 | 6.792190000000000  | 6.621820000000000 |
| H  | 10.113740000000000 | 4.880200000000000  | 7.268190000000000 |
| H  | 11.995469999999999 | 17.111580000000000 | 6.857640000000000 |
| H  | 6.764460000000000  | 8.001110000000001  | 7.947780000000000 |
| H  | 17.109480000000001 | 11.985429999999999 | 7.632910000000000 |
| H  | 16.071750000000002 | 8.655130000000000  | 6.860580000000000 |
| H  | 15.222580000000001 | 14.033220000000000 | 7.969390000000000 |
| H  | 5.929450000000000  | 13.336130000000001 | 6.626140000000000 |
| H  | 4.880250000000000  | 10.025150000000000 | 7.475050000000000 |
| C  | 10.335150000000001 | 15.212289999999999 | 6.877190000000000 |
| C  | 9.926580000000000  | 13.837660000000000 | 6.871860000000000 |
| C  | 8.603920000000000  | 13.389300000000000 | 6.718820000000000 |
| C  | 11.648410000000000 | 6.817330000000000  | 6.858700000000000 |
| C  | 12.068600000000000 | 8.188980000000001  | 6.890090000000000 |
| C  | 13.400440000000000 | 8.625810000000000  | 6.803110000000000 |
| C  | 10.316680000000000 | 6.770220000000000  | 7.217320000000000 |
| C  | 9.895130000000000  | 8.142670000000001  | 7.387110000000000 |
| C  | 11.680410000000000 | 15.257800000000000 | 7.181770000000000 |
| C  | 8.573810000000000  | 8.581960000000000  | 7.612850000000000 |
| C  | 15.207730000000000 | 11.669280000000001 | 7.480180000000000 |
| C  | 12.101129999999999 | 13.886740000000000 | 7.359600000000000 |
| C  | 13.839549999999999 | 12.112560000000000 | 7.464810000000000 |
| C  | 15.218600000000000 | 10.328930000000000 | 7.165110000000000 |
| C  | 13.838979999999999 | 9.939890000000000  | 7.003630000000000 |
| C  | 13.419850000000000 | 13.449320000000000 | 7.605190000000000 |
| C  | 6.780400000000000  | 11.682040000000001 | 7.035910000000000 |
| C  | 8.163750000000000  | 12.075910000000000 | 6.923590000000000 |
| C  | 6.785360000000000  | 10.352620000000000 | 7.395240000000000 |
| C  | 8.155419999999999  | 9.916470000000000  | 7.443200000000000 |
| Mn | 10.998559999999999 | 11.014540000000000 | 7.475540000000000 |
| O  | 10.995240000000001 | 11.029310000000001 | 9.154460000000000 |
| O  | 9.502860000000000  | 16.309809999999999 | 6.581660000000000 |
| O  | 7.603540000000000  | 14.307490000000000 | 6.418580000000000 |
| O  | 12.478009999999999 | 5.703110000000000  | 6.614180000000000 |
| O  | 14.410259999999999 | 7.692680000000000  | 6.585300000000000 |
| O  | 9.528870000000000  | 5.659770000000000  | 7.342940000000000 |
| O  | 12.477190000000000 | 16.368590000000001 | 7.270880000000000 |
| O  | 7.661980000000000  | 7.607520000000000  | 7.920390000000000 |
| O  | 16.286349999999999 | 12.499779999999999 | 7.728730000000000 |
| O  | 16.357109999999999 | 9.573840000000001  | 7.051990000000000 |
| O  | 14.326050000000000 | 14.426890000000000 | 7.919510000000000 |
| O  | 5.643180000000000  | 12.426600000000001 | 6.854740000000000 |
| O  | 5.702200000000000  | 9.523790000000000  | 7.630850000000000 |
| N  | 11.020940000000000 | 13.034250000000000 | 7.152420000000000 |
| N  | 10.976640000000000 | 8.994070000000001  | 7.176640000000000 |
| N  | 13.006430000000000 | 11.038670000000000 | 7.169790000000000 |
| N  | 8.993910000000000  | 10.986730000000000 | 7.152810000000000 |

Transition Metal: Mn; Functional Group: OH; Adsorbate: OH

|    |                    |                    |                   |
|----|--------------------|--------------------|-------------------|
| H  | 10.891830000000001 | 9.994380000000000  | 9.770180000000000 |
| H  | 9.508760000000001  | 16.962930000000000 | 7.301990000000000 |
| H  | 7.954880000000000  | 15.261620000000001 | 6.638750000000000 |
| H  | 12.547760000000000 | 5.448410000000000  | 5.475260000000000 |
| H  | 14.036479999999999 | 6.746970000000000  | 6.806050000000000 |
| H  | 10.073890000000000 | 4.825260000000000  | 6.603310000000000 |
| H  | 11.982600000000000 | 17.139030000000002 | 6.357050000000000 |
| H  | 6.694980000000000  | 7.959710000000000  | 7.315350000000000 |
| H  | 17.113160000000001 | 11.978330000000000 | 7.567550000000000 |
| H  | 16.071210000000001 | 8.608140000000001  | 7.231030000000000 |
| H  | 15.289960000000001 | 14.067159999999999 | 7.453240000000000 |
| H  | 5.909210000000000  | 13.399260000000000 | 7.035680000000000 |
| H  | 4.872110000000000  | 10.026280000000000 | 7.331720000000000 |
| C  | 10.327980000000000 | 15.275119999999999 | 6.750650000000000 |
| C  | 9.913930000000001  | 13.907650000000000 | 6.891040000000000 |
| C  | 8.582570000000000  | 13.446479999999999 | 6.924400000000000 |
| C  | 11.669840000000001 | 6.760170000000000  | 6.633200000000000 |
| C  | 12.078690000000000 | 8.120020000000000  | 6.852540000000000 |
| C  | 13.408490000000000 | 8.578790000000000  | 6.961930000000000 |
| C  | 10.292280000000000 | 6.711600000000000  | 6.744400000000000 |
| C  | 9.863429999999999  | 8.073729999999999  | 6.990750000000000 |
| C  | 11.707720000000000 | 15.310060000000000 | 6.828770000000000 |
| C  | 8.536370000000000  | 8.532500000000001  | 7.177800000000000 |
| C  | 15.206329999999999 | 11.675100000000000 | 7.453450000000000 |
| C  | 12.132569999999999 | 13.943199999999999 | 7.046020000000000 |
| C  | 13.848940000000001 | 12.131220000000001 | 7.322960000000000 |
| C  | 15.207720000000000 | 10.302339999999999 | 7.334550000000000 |
| C  | 13.832269999999999 | 9.904660000000000  | 7.156790000000000 |
| C  | 13.456930000000000 | 13.488049999999999 | 7.251990000000000 |
| C  | 6.776520000000000  | 11.713419999999999 | 7.205550000000000 |
| C  | 8.155530000000001  | 12.117830000000000 | 7.091460000000000 |
| C  | 6.780800000000000  | 10.341020000000000 | 7.327860000000000 |
| C  | 8.145379999999999  | 9.890610000000001  | 7.254470000000000 |
| Mn | 10.994109999999999 | 11.042190000000000 | 7.540010000000000 |
| O  | 10.993530000000000 | 10.901550000000000 | 9.431050000000001 |
| O  | 9.470789999999999  | 16.370439999999999 | 6.525570000000000 |
| O  | 7.554760000000000  | 14.375540000000001 | 6.795650000000000 |
| O  | 12.523610000000000 | 5.655200000000000  | 6.430140000000000 |
| O  | 14.437130000000000 | 7.642150000000000  | 6.892660000000000 |
| O  | 9.490280000000000  | 5.608990000000000  | 6.632930000000000 |
| O  | 12.518900000000000 | 16.408799999999999 | 6.723050000000000 |
| O  | 7.583850000000000  | 7.549590000000000  | 7.247440000000000 |
| O  | 16.297219999999999 | 12.510460000000000 | 7.621670000000000 |
| O  | 16.347169999999998 | 9.539970000000000  | 7.362540000000000 |
| O  | 14.402550000000000 | 14.474030000000001 | 7.359040000000000 |
| O  | 5.632960000000000  | 12.469200000000001 | 7.179000000000000 |
| O  | 5.686200000000000  | 9.501590000000000  | 7.450030000000000 |
| N  | 11.025520000000000 | 13.110650000000000 | 7.062370000000000 |
| N  | 10.966229999999999 | 8.906549999999999  | 7.045590000000000 |
| N  | 13.009530000000000 | 11.030720000000001 | 7.153280000000000 |
| N  | 8.985070000000000  | 10.998840000000000 | 7.125410000000000 |



Transition Metal: Mn; Functional Group: OH; Adsorbate: OOH

|    |                     |                    |                    |
|----|---------------------|--------------------|--------------------|
| H  | 9.4001300000000001  | 16.874680000000001 | 6.524660000000000  |
| H  | 7.9931800000000000  | 15.229970000000000 | 5.530270000000000  |
| H  | 12.3825800000000001 | 5.412160000000000  | 4.775030000000000  |
| H  | 14.0170800000000000 | 6.786070000000000  | 5.775720000000000  |
| H  | 10.093579999999999  | 4.865690000000000  | 6.258440000000000  |
| H  | 11.9874800000000000 | 17.132909999999999 | 5.892670000000000  |
| H  | 6.7258200000000000  | 7.984080000000000  | 6.875990000000000  |
| H  | 17.109439999999999  | 11.990910000000000 | 6.667570000000000  |
| H  | 16.0625100000000000 | 8.650910000000000  | 6.013560000000000  |
| H  | 15.244809999999999  | 14.058780000000000 | 6.939660000000000  |
| H  | 5.9249900000000000  | 13.363460000000000 | 5.778500000000000  |
| H  | 4.8656700000000000  | 10.033310000000000 | 6.457320000000000  |
| H  | 10.3637800000000000 | 10.761189999999999 | 10.228710000000000 |
| C  | 10.3285800000000001 | 15.239830000000000 | 5.989520000000000  |
| C  | 9.9156200000000001  | 13.866339999999999 | 6.014760000000000  |
| C  | 8.5913400000000001  | 13.416230000000001 | 5.883010000000000  |
| C  | 11.6438700000000000 | 6.805160000000000  | 5.934310000000000  |
| C  | 12.063689999999999  | 8.176119999999999  | 6.004080000000000  |
| C  | 13.3963800000000001 | 8.618750000000000  | 5.952700000000000  |
| C  | 10.2978700000000000 | 6.756320000000000  | 6.235810000000000  |
| C  | 9.872999999999999   | 8.127459999999999  | 6.413710000000000  |
| C  | 11.6846400000000000 | 15.282730000000001 | 6.240980000000000  |
| C  | 8.5471900000000001  | 8.567270000000001  | 6.611020000000000  |
| C  | 15.204359999999999  | 11.680920000000000 | 6.559790000000000  |
| C  | 12.1060000000000000 | 13.911670000000001 | 6.424730000000000  |
| C  | 13.838789999999999  | 12.127459999999999 | 6.547230000000000  |
| C  | 15.210129999999999  | 10.329240000000000 | 6.287450000000000  |
| C  | 13.8312800000000000 | 9.935860000000000  | 6.151100000000000  |
| C  | 13.428229999999999  | 13.473220000000000 | 6.643770000000000  |
| C  | 6.7732300000000000  | 11.697020000000000 | 6.133320000000000  |
| C  | 8.154389999999999   | 12.097220000000000 | 6.065360000000000  |
| C  | 6.7722700000000000  | 10.350250000000001 | 6.429000000000000  |
| C  | 8.1383500000000001  | 9.911400000000000  | 6.488920000000000  |
| Mn | 10.9873700000000000 | 11.020750000000000 | 6.562150000000000  |
| O  | 9.4917200000000001  | 16.339070000000000 | 5.712390000000000  |
| O  | 7.5844300000000000  | 14.337050000000000 | 5.603380000000000  |
| O  | 12.4803500000000000 | 5.692360000000000  | 5.706250000000000  |
| O  | 14.414429999999999  | 7.686550000000000  | 5.756300000000000  |
| O  | 9.5060100000000000  | 5.644530000000000  | 6.317320000000000  |
| O  | 12.4869200000000000 | 16.391850000000002 | 6.287810000000000  |
| O  | 7.6207600000000000  | 7.585560000000000  | 6.850750000000000  |
| O  | 16.290669999999999  | 12.510260000000001 | 6.773820000000000  |
| O  | 16.3487000000000001 | 9.573600000000001  | 6.186410000000000  |
| O  | 14.350289999999999  | 14.456830000000000 | 6.897280000000000  |
| O  | 5.6368900000000000  | 12.445160000000000 | 5.968730000000000  |
| O  | 5.6809800000000000  | 9.518950000000000  | 6.605720000000000  |
| O  | 11.1847600000000001 | 11.005900000000000 | 8.539339999999999  |
| O  | 9.9606900000000000  | 10.828450000000000 | 9.339410000000001  |
| N  | 11.012499999999999  | 13.064460000000000 | 6.277910000000000  |
| N  | 10.9656900000000000 | 8.974880000000001  | 6.270400000000000  |
| N  | 13.0033200000000000 | 11.041639999999999 | 6.303010000000000  |
| N  | 8.9803200000000001  | 10.999040000000001 | 6.275370000000000  |

Transition Metal: Ni; Functional Group: BH2; Adsorbate: Clean

|    |                    |                    |                   |
|----|--------------------|--------------------|-------------------|
| N  | 10.764290000000001 | 12.981400000000001 | 7.263770000000000 |
| N  | 10.937760000000001 | 9.014130000000000  | 7.287850000000000 |
| N  | 12.813850000000000 | 11.090999999999999 | 7.347620000000000 |
| N  | 8.940500000000000  | 10.976590000000000 | 7.362720000000000 |
| Ni | 10.865280000000000 | 11.021030000000000 | 7.319340000000000 |
| C  | 10.153680000000000 | 15.258410000000000 | 7.043660000000000 |
| C  | 9.686380000000000  | 13.864080000000000 | 7.151380000000000 |
| C  | 8.351200000000000  | 13.423270000000000 | 7.232210000000000 |
| C  | 11.577080000000000 | 6.736270000000000  | 7.106740000000000 |
| C  | 12.031960000000000 | 8.140599999999999  | 7.157390000000000 |
| C  | 13.342980000000001 | 8.603510000000000  | 7.199370000000000 |
| C  | 10.193390000000001 | 6.781740000000000  | 7.301550000000000 |
| C  | 9.848960000000000  | 8.185650000000001  | 7.379100000000000 |
| C  | 11.545970000000001 | 15.178410000000000 | 7.163060000000000 |
| C  | 8.498200000000001  | 8.561150000000000  | 7.503380000000000 |
| C  | 15.094820000000000 | 11.714250000000000 | 7.540140000000000 |
| C  | 11.882180000000000 | 13.790160000000000 | 7.277160000000000 |
| C  | 13.696370000000000 | 12.175950000000000 | 7.460020000000000 |
| C  | 15.019430000000000 | 10.327590000000001 | 7.399690000000000 |
| C  | 13.624020000000000 | 9.982490000000000  | 7.309180000000000 |
| C  | 13.250420000000000 | 13.495780000000000 | 7.387700000000000 |
| C  | 6.692620000000000  | 11.666850000000000 | 7.454190000000000 |
| C  | 8.083620000000000  | 12.063820000000000 | 7.344150000000000 |
| C  | 6.681610000000000  | 10.282590000000001 | 7.536410000000000 |
| C  | 8.096610000000000  | 9.902760000000001  | 7.473850000000000 |
| B  | 9.429390000000000  | 16.550450000000001 | 6.620070000000000 |
| B  | 6.967590000000000  | 14.233140000000001 | 7.302040000000000 |
| B  | 12.280450000000000 | 5.441910000000000  | 6.665880000000000 |
| B  | 14.712160000000001 | 7.777000000000000  | 7.242110000000000 |
| B  | 9.103400000000001  | 5.638390000000000  | 7.343460000000000 |
| B  | 12.823750000000000 | 16.099329999999998 | 7.149310000000000 |
| B  | 7.461610000000000  | 7.494930000000000  | 7.639310000000000 |
| B  | 16.391269999999999 | 12.427830000000000 | 7.973610000000000 |
| B  | 15.949439999999999 | 9.059030000000000  | 7.388510000000000 |
| B  | 14.095179999999999 | 14.856320000000000 | 7.318650000000000 |
| B  | 5.750840000000000  | 12.920529999999999 | 7.456520000000000 |
| B  | 5.529520000000000  | 9.216030000000000  | 7.653150000000000 |
| H  | 8.372400000000001  | 16.551850000000002 | 6.051620000000000 |
| H  | 9.993550000000001  | 17.600030000000000 | 6.797820000000000 |
| H  | 6.235830000000000  | 13.816129999999999 | 8.345570000000000 |
| H  | 6.797970000000000  | 15.414880000000000 | 7.287700000000000 |
| H  | 11.712350000000001 | 4.397940000000000  | 6.873660000000000 |
| H  | 13.315890000000000 | 5.419460000000000  | 6.059440000000000 |
| H  | 14.860120000000000 | 6.593820000000000  | 7.213230000000000 |
| H  | 15.596380000000000 | 8.265480000000000  | 6.357430000000000 |
| H  | 9.016100000000000  | 4.938730000000000  | 8.325130000000000 |
| H  | 8.673640000000001  | 5.189060000000000  | 6.307330000000000 |
| H  | 13.714060000000000 | 15.600009999999999 | 6.268380000000000 |
| H  | 12.905010000000001 | 17.289010000000001 | 7.055630000000000 |
| H  | 6.243380000000000  | 7.703450000000000  | 7.714890000000000 |
| H  | 7.692350000000000  | 6.278630000000000  | 7.736980000000000 |
| H  | 16.390950000000000 | 13.433500000000000 | 8.629189999999999 |
| H  | 17.444400000000002 | 11.902360000000000 | 7.717850000000000 |
| H  | 15.475180000000000 | 8.170510000000000  | 8.278480000000000 |
| H  | 17.141800000000000 | 8.990819999999999  | 7.455550000000000 |
| H  | 13.623790000000000 | 15.763019999999999 | 8.185879999999999 |
| H  | 15.281630000000000 | 14.986100000000000 | 7.347740000000000 |
| H  | 4.558070000000000  | 12.981290000000000 | 7.545950000000000 |
| H  | 6.083800000000000  | 13.738780000000000 | 6.425690000000000 |
| H  | 4.919430000000000  | 8.885070000000001  | 6.663700000000000 |
| H  | 5.007640000000000  | 9.010650000000000  | 8.723520000000001 |

Transition Metal: Ni; Functional Group: BH2; Adsorbate: O

|    |                    |                    |                   |
|----|--------------------|--------------------|-------------------|
| Ni | 10.865530000000000 | 11.022880000000001 | 7.462120000000000 |
| C  | 10.146250000000000 | 15.318849999999999 | 6.766240000000000 |
| C  | 9.670249999999999  | 13.920000000000000 | 6.899990000000000 |
| C  | 8.335960000000000  | 13.436310000000001 | 6.936560000000000 |
| C  | 11.585480000000000 | 6.680100000000000  | 6.834900000000000 |
| C  | 12.043310000000000 | 8.090529999999999  | 6.904140000000000 |
| C  | 13.351000000000001 | 8.594659999999999  | 6.919240000000000 |
| C  | 10.191710000000000 | 6.726460000000000  | 6.975270000000000 |
| C  | 9.841600000000000  | 8.137280000000001  | 7.054190000000000 |
| C  | 11.543509999999999 | 15.230370000000001 | 6.854910000000000 |
| C  | 8.482260000000000  | 8.540740000000000  | 7.119170000000000 |
| C  | 15.140790000000001 | 11.725569999999999 | 7.084960000000000 |
| C  | 11.877739999999999 | 13.836980000000001 | 6.985310000000000 |
| C  | 13.734610000000000 | 12.194210000000000 | 7.067900000000000 |
| C  | 15.053970000000000 | 10.332070000000000 | 6.988290000000000 |
| C  | 13.651289999999999 | 9.985110000000001  | 6.972460000000000 |
| C  | 13.254920000000000 | 13.516299999999999 | 7.028380000000000 |
| C  | 6.656660000000000  | 11.665060000000000 | 7.034140000000000 |
| C  | 8.054330000000000  | 12.065090000000000 | 6.988130000000000 |
| C  | 6.638270000000000  | 10.275960000000000 | 7.092930000000000 |
| C  | 8.060510000000001  | 9.888010000000000  | 7.075780000000000 |
| B  | 9.421060000000001  | 16.617989999999999 | 6.361780000000000 |
| B  | 6.943270000000000  | 14.237450000000001 | 6.968870000000000 |
| B  | 12.293960000000000 | 5.377270000000000  | 6.426460000000000 |
| B  | 14.728260000000001 | 7.775020000000000  | 6.929510000000000 |
| B  | 9.099550000000001  | 5.585830000000000  | 6.970720000000000 |
| B  | 12.832290000000000 | 16.136050000000001 | 6.785400000000000 |
| B  | 7.437020000000000  | 7.474150000000000  | 7.205890000000000 |
| B  | 16.464600000000001 | 12.437180000000000 | 7.435470000000000 |
| B  | 15.976730000000000 | 9.055930000000000  | 6.975030000000000 |
| B  | 14.098480000000000 | 14.878600000000000 | 6.916620000000000 |
| B  | 5.717870000000000  | 12.923859999999999 | 7.030290000000000 |
| B  | 5.478850000000000  | 9.216020000000000  | 7.170050000000000 |
| H  | 8.347000000000000  | 16.629770000000001 | 5.826590000000000 |
| H  | 9.993960000000000  | 17.664249999999999 | 6.529810000000000 |
| H  | 6.164750000000000  | 13.792170000000000 | 7.965770000000000 |
| H  | 6.775130000000000  | 15.419280000000001 | 6.976530000000000 |
| H  | 11.717169999999999 | 4.337400000000000  | 6.631980000000000 |
| H  | 13.346530000000000 | 5.342240000000000  | 5.851270000000000 |
| H  | 14.874440000000000 | 6.591330000000000  | 6.930600000000000 |
| H  | 15.572880000000000 | 8.232780000000000  | 5.987920000000000 |
| H  | 8.960060000000000  | 4.897570000000000  | 7.954210000000000 |
| H  | 8.708000000000000  | 5.134960000000000  | 5.920650000000000 |
| H  | 13.681820000000000 | 15.618350000000000 | 5.875050000000000 |
| H  | 12.928300000000000 | 17.323910000000001 | 6.681450000000000 |
| H  | 6.219310000000000  | 7.689130000000000  | 7.236980000000000 |
| H  | 7.669280000000000  | 6.257620000000000  | 7.291220000000000 |
| H  | 16.505009999999999 | 13.457590000000000 | 8.066260000000000 |
| H  | 17.500520000000002 | 11.899190000000001 | 7.139660000000000 |
| H  | 15.536060000000001 | 8.202909999999999  | 7.916300000000000 |
| H  | 17.170300000000001 | 8.977490000000000  | 6.994120000000000 |
| H  | 13.662750000000001 | 15.793659999999999 | 7.794990000000000 |
| H  | 15.285769999999999 | 15.002670000000000 | 6.902460000000000 |
| H  | 4.522550000000000  | 12.991130000000000 | 7.066610000000000 |
| H  | 6.100250000000000  | 13.766850000000000 | 6.038980000000000 |
| H  | 4.895090000000000  | 8.886939999999999  | 6.165250000000000 |
| H  | 4.938620000000000  | 8.994389999999999  | 8.227940000000000 |
| O  | 10.892530000000001 | 11.004899999999999 | 9.178450000000000 |
| N  | 10.747450000000001 | 13.059130000000000 | 7.019230000000000 |
| N  | 10.941680000000000 | 8.938750000000001  | 7.015460000000000 |
| N  | 12.867590000000000 | 11.105700000000001 | 7.005670000000000 |
| N  | 8.890440000000000  | 10.966670000000001 | 7.002020000000000 |

Transition Metal: Ni; Functional Group: BH2; Adsorbate: OH

|    |                    |                    |                   |
|----|--------------------|--------------------|-------------------|
| Ni | 10.866840000000000 | 11.032340000000000 | 7.000380000000000 |
| C  | 10.157090000000000 | 15.276450000000001 | 6.581360000000000 |
| C  | 9.684659999999999  | 13.883950000000000 | 6.702430000000000 |
| C  | 8.349430000000000  | 13.433890000000000 | 6.779020000000000 |
| C  | 11.580209999999999 | 6.727970000000000  | 6.641080000000000 |
| C  | 12.036659999999999 | 8.134440000000000  | 6.696580000000000 |
| C  | 13.345160000000000 | 8.605790000000001  | 6.743920000000000 |
| C  | 10.196980000000000 | 6.774010000000000  | 6.840610000000000 |
| C  | 9.853450000000000  | 8.182110000000000  | 6.926250000000000 |
| C  | 11.551140000000000 | 15.193440000000001 | 6.695350000000000 |
| C  | 8.504110000000001  | 8.564240000000000  | 7.062950000000000 |
| C  | 15.108660000000000 | 11.718280000000000 | 7.066400000000000 |
| C  | 11.886870000000000 | 13.805940000000000 | 6.823410000000000 |
| C  | 13.708530000000000 | 12.184990000000001 | 6.991580000000000 |
| C  | 15.027410000000000 | 10.330990000000000 | 6.935530000000000 |
| C  | 13.629080000000000 | 9.987610000000000  | 6.848550000000000 |
| C  | 13.256750000000000 | 13.505250000000000 | 6.926630000000000 |
| C  | 6.691640000000000  | 11.670940000000000 | 6.987930000000000 |
| C  | 8.082020000000000  | 12.072590000000000 | 6.882260000000000 |
| C  | 6.683710000000000  | 10.285670000000000 | 7.072660000000000 |
| C  | 8.101620000000000  | 9.906960000000000  | 7.020180000000000 |
| B  | 9.428610000000001  | 16.569009999999999 | 6.163820000000000 |
| B  | 6.961370000000000  | 14.239560000000001 | 6.845490000000000 |
| B  | 12.284129999999999 | 5.432910000000000  | 6.201310000000000 |
| B  | 14.714040000000001 | 7.778230000000000  | 6.794070000000000 |
| B  | 9.100149999999999  | 5.637240000000000  | 6.872650000000000 |
| B  | 12.832020000000000 | 16.111129999999999 | 6.670400000000000 |
| B  | 7.467740000000000  | 7.501430000000000  | 7.221900000000000 |
| B  | 16.414010000000001 | 12.428400000000000 | 7.482210000000000 |
| B  | 15.953490000000000 | 9.057510000000001  | 6.934080000000000 |
| B  | 14.101620000000000 | 14.867260000000000 | 6.846540000000000 |
| B  | 5.747790000000000  | 12.923880000000000 | 6.988070000000000 |
| B  | 5.535010000000000  | 9.211470000000000  | 7.162730000000000 |
| H  | 10.606240000000000 | 11.807570000000000 | 9.354920000000000 |
| H  | 8.356180000000000  | 16.573879999999999 | 5.625780000000000 |
| H  | 10.002219999999999 | 17.616479999999999 | 6.321200000000000 |
| H  | 6.225980000000000  | 13.817909999999999 | 7.883340000000000 |
| H  | 6.791110000000000  | 15.421080000000000 | 6.833680000000000 |
| H  | 11.716170000000000 | 4.389990000000000  | 6.413630000000000 |
| H  | 13.319400000000000 | 5.409850000000000  | 5.594930000000000 |
| H  | 14.857609999999999 | 6.594220000000000  | 6.771620000000000 |
| H  | 15.602399999999999 | 8.258490000000000  | 5.906860000000000 |
| H  | 9.025240000000000  | 4.910680000000000  | 7.835320000000000 |
| H  | 8.646129999999999  | 5.222650000000000  | 5.832030000000000 |
| H  | 13.718370000000000 | 15.603960000000001 | 5.790910000000000 |
| H  | 12.915319999999999 | 17.299650000000000 | 6.566640000000000 |
| H  | 6.251480000000000  | 7.715700000000000  | 7.321380000000000 |
| H  | 7.701490000000000  | 6.286140000000000  | 7.325660000000000 |
| H  | 16.430850000000000 | 13.455730000000001 | 8.101699999999999 |
| H  | 17.458420000000000 | 11.877300000000000 | 7.245780000000000 |
| H  | 15.473480000000000 | 8.178150000000000  | 7.829610000000000 |
| H  | 17.145309999999998 | 8.985210000000000  | 7.005910000000000 |
| H  | 13.632650000000000 | 15.781020000000000 | 7.708080000000000 |
| H  | 15.287770000000000 | 14.997010000000000 | 6.872040000000000 |
| H  | 4.554850000000000  | 12.982820000000000 | 7.072490000000000 |
| H  | 6.083270000000000  | 13.746960000000000 | 5.962010000000000 |
| H  | 4.978130000000000  | 8.854600000000000  | 6.150960000000000 |
| H  | 4.957560000000000  | 9.032539999999999  | 8.208750000000000 |
| O  | 10.900430000000000 | 10.939120000000001 | 9.015340000000000 |
| N  | 10.763350000000001 | 13.008940000000001 | 6.818930000000000 |
| N  | 10.940980000000000 | 8.997400000000001  | 6.824050000000000 |
| N  | 12.833980000000000 | 11.100000000000000 | 6.875940000000000 |
| N  | 8.932390000000000  | 10.982559999999999 | 6.892130000000000 |

Transition Metal: Ni; Functional Group: BH2; Adsorbate: OOH

|    |                    |                    |                    |
|----|--------------------|--------------------|--------------------|
| Ni | 10.865530000000000 | 11.022880000000001 | 7.462120000000000  |
| C  | 10.146250000000000 | 15.318849999999999 | 6.766240000000000  |
| C  | 9.670249999999999  | 13.920000000000000 | 6.899990000000000  |
| C  | 8.335960000000000  | 13.436310000000001 | 6.936560000000000  |
| C  | 11.585480000000000 | 6.680100000000000  | 6.834900000000000  |
| C  | 12.043310000000000 | 8.090529999999999  | 6.904140000000000  |
| C  | 13.351000000000001 | 8.594659999999999  | 6.919240000000000  |
| C  | 10.191710000000000 | 6.726460000000000  | 6.975270000000000  |
| C  | 9.841600000000000  | 8.137280000000001  | 7.054190000000000  |
| C  | 11.543509999999999 | 15.230370000000001 | 6.854910000000000  |
| C  | 8.482260000000000  | 8.540740000000000  | 7.119170000000000  |
| C  | 15.140790000000001 | 11.725569999999999 | 7.084960000000000  |
| C  | 11.877739999999999 | 13.836980000000001 | 6.985310000000000  |
| C  | 13.734610000000000 | 12.194210000000000 | 7.067900000000000  |
| C  | 15.053970000000000 | 10.332070000000000 | 6.988290000000000  |
| C  | 13.651289999999999 | 9.985110000000001  | 6.972460000000000  |
| C  | 13.254920000000000 | 13.516299999999999 | 7.028380000000000  |
| C  | 6.656660000000000  | 11.665060000000000 | 7.034140000000000  |
| C  | 8.054330000000000  | 12.065090000000000 | 6.988130000000000  |
| C  | 6.638270000000000  | 10.275960000000000 | 7.092930000000000  |
| C  | 8.060510000000001  | 9.888010000000000  | 7.075780000000000  |
| B  | 9.421060000000001  | 16.617989999999999 | 6.361780000000000  |
| B  | 6.943270000000000  | 14.237450000000001 | 6.968870000000000  |
| B  | 12.293960000000000 | 5.377270000000000  | 6.426460000000000  |
| B  | 14.728260000000001 | 7.775020000000000  | 6.929510000000000  |
| B  | 9.099550000000001  | 5.585830000000000  | 6.970720000000000  |
| B  | 12.832290000000000 | 16.136050000000001 | 6.785400000000000  |
| B  | 7.437020000000000  | 7.474150000000000  | 7.205890000000000  |
| B  | 16.464600000000001 | 12.437180000000000 | 7.435470000000000  |
| B  | 15.976730000000000 | 9.055930000000000  | 6.975030000000000  |
| B  | 14.098480000000000 | 14.878600000000000 | 6.916620000000000  |
| B  | 5.717870000000000  | 12.923859999999999 | 7.030290000000000  |
| B  | 5.478850000000000  | 9.216020000000000  | 7.170050000000000  |
| H  | 8.347000000000000  | 16.629770000000001 | 5.826590000000000  |
| H  | 9.993960000000000  | 17.664249999999999 | 6.529810000000000  |
| H  | 6.164750000000000  | 13.792170000000000 | 7.965770000000000  |
| H  | 6.775130000000000  | 15.419280000000001 | 6.976530000000000  |
| H  | 11.717169999999999 | 4.337400000000000  | 6.631980000000000  |
| H  | 13.346530000000000 | 5.342240000000000  | 5.851270000000000  |
| H  | 14.874440000000000 | 6.591330000000000  | 6.930600000000000  |
| H  | 15.572880000000000 | 8.232780000000000  | 5.987920000000000  |
| H  | 8.960060000000000  | 4.897570000000000  | 7.954210000000000  |
| H  | 8.708000000000000  | 5.134960000000000  | 5.920650000000000  |
| H  | 13.681820000000000 | 15.618350000000000 | 5.875050000000000  |
| H  | 12.928300000000000 | 17.323910000000001 | 6.681450000000000  |
| H  | 6.219310000000000  | 7.689130000000000  | 7.236980000000000  |
| H  | 7.669280000000000  | 6.257620000000000  | 7.291220000000000  |
| H  | 16.505009999999999 | 13.457590000000000 | 8.066260000000000  |
| H  | 17.500520000000002 | 11.899190000000001 | 7.139660000000000  |
| H  | 15.536060000000001 | 8.202909999999999  | 7.916300000000000  |
| H  | 17.170300000000001 | 8.977490000000000  | 6.994120000000000  |
| H  | 13.662750000000001 | 15.793659999999999 | 7.794990000000000  |
| H  | 15.285769999999999 | 15.002670000000000 | 6.902460000000000  |
| H  | 4.522550000000000  | 12.991130000000000 | 7.066610000000000  |
| H  | 6.100250000000000  | 13.766850000000000 | 6.038980000000000  |
| H  | 4.895090000000000  | 8.886939999999999  | 6.165250000000000  |
| H  | 4.938620000000000  | 8.994389999999999  | 8.227940000000000  |
| N  | 10.747450000000001 | 13.059130000000000 | 7.019230000000000  |
| N  | 10.941680000000000 | 8.938750000000001  | 7.015460000000000  |
| N  | 12.867590000000000 | 11.105700000000001 | 7.005670000000000  |
| N  | 8.890440000000000  | 10.966670000000001 | 7.002020000000000  |
| O  | 10.898591163074730 | 11.000863714367272 | 9.563744667409260  |
| H  | 9.333487249574532  | 11.497100263723958 | 10.518444787151587 |
| O  | 9.769351080747558  | 10.629512193694644 | 10.370218322097703 |

## Transition Metal: Ni; Functional Group: CH3; Adsorbate: Clean

|    |                    |                    |                    |
|----|--------------------|--------------------|--------------------|
| Ni | 10.967400000000000 | 11.053390000000000 | 7.408660000000000  |
| C  | 10.484570000000000 | 15.189880000000000 | 7.649520000000000  |
| C  | 9.970319999999999  | 13.819860000000000 | 7.705230000000000  |
| C  | 8.630770000000000  | 13.421390000000001 | 7.930980000000000  |
| C  | 11.578070000000000 | 6.983970000000000  | 8.177680000000001  |
| C  | 11.960089999999999 | 8.394250000000000  | 8.222340000000001  |
| C  | 13.215470000000000 | 8.907560000000000  | 8.620920000000000  |
| C  | 10.411560000000000 | 6.908550000000000  | 7.433140000000000  |
| C  | 10.020759999999999 | 8.281800000000000  | 7.123000000000000  |
| C  | 11.707649999999999 | 15.135439999999999 | 7.002580000000000  |
| C  | 8.766100000000000  | 8.704969999999999  | 6.633360000000000  |
| C  | 15.093310000000001 | 11.551670000000000 | 6.951480000000000  |
| C  | 12.008419999999999 | 13.724930000000001 | 6.792550000000000  |
| C  | 13.699180000000000 | 11.961220000000001 | 6.797350000000000  |
| C  | 15.092960000000000 | 10.439390000000000 | 7.778390000000000  |
| C  | 13.694100000000001 | 10.103210000000001 | 8.034260000000000  |
| C  | 13.238429999999999 | 13.205880000000001 | 6.318250000000000  |
| C  | 6.833490000000000  | 11.580679999999999 | 7.757970000000000  |
| C  | 8.211069999999999  | 12.078690000000000 | 7.768090000000000  |
| C  | 6.865000000000000  | 10.316720000000000 | 7.193970000000000  |
| C  | 8.269380000000000  | 9.980840000000001  | 6.994920000000000  |
| C  | 9.921700000000000  | 16.433740000000000 | 8.296609999999999  |
| C  | 7.573380000000000  | 14.500000000000000 | 8.116350000000001  |
| C  | 12.348250000000000 | 5.805000000000000  | 8.714969999999999  |
| C  | 14.060330000000000 | 8.169219999999999  | 9.645080000000000  |
| C  | 9.644539999999999  | 5.646970000000000  | 7.129890000000000  |
| C  | 12.610200000000001 | 16.313479999999998 | 6.743300000000000  |
| C  | 7.937650000000000  | 7.791890000000000  | 5.745300000000000  |
| C  | 16.320570000000000 | 12.250570000000000 | 6.425750000000000  |
| C  | 16.314609999999998 | 9.664520000000000  | 8.203320000000000  |
| C  | 14.057919999999999 | 14.010339999999999 | 5.323630000000000  |
| C  | 5.600090000000000  | 12.203840000000000 | 8.369490000000001  |
| C  | 5.670090000000000  | 9.419969999999999  | 6.999870000000000  |
| N  | 10.972030000000000 | 12.951390000000000 | 7.281120000000000  |
| N  | 10.986030000000000 | 9.153010000000000  | 7.595280000000000  |
| N  | 12.878030000000001 | 11.043320000000000 | 7.431360000000000  |
| N  | 9.061719999999999  | 11.042740000000000 | 7.393440000000000  |
| H  | 9.349390000000000  | 16.204070000000002 | 9.204770000000000  |
| H  | 10.740399999999999 | 17.104939999999999 | 8.597260000000000  |
| H  | 9.264430000000001  | 17.019079999999999 | 7.629310000000000  |
| H  | 6.632330000000000  | 14.215199999999999 | 7.639720000000000  |
| H  | 7.356920000000000  | 14.715940000000000 | 9.176869999999999  |
| H  | 7.877600000000000  | 15.436730000000001 | 7.644400000000000  |
| H  | 12.369560000000000 | 5.773150000000000  | 9.816670000000000  |
| H  | 11.905139999999999 | 4.860070000000000  | 8.373300000000000  |
| H  | 13.394399999999999 | 5.806640000000000  | 8.372260000000001  |
| H  | 14.679880000000001 | 8.879180000000000  | 10.206770000000001 |
| H  | 13.413990000000000 | 7.665600000000000  | 10.374810000000000 |
| H  | 14.735130000000000 | 7.406210000000000  | 9.223839999999999  |
| H  | 9.633590000000000  | 5.400410000000000  | 6.055450000000000  |
| H  | 10.081780000000000 | 4.787000000000000  | 7.654420000000000  |
| H  | 8.595260000000000  | 5.717090000000000  | 7.454960000000000  |
| H  | 12.241490000000001 | 17.208359999999999 | 7.262970000000000  |
| H  | 13.640540000000000 | 16.135590000000001 | 7.087070000000000  |
| H  | 12.666760000000000 | 16.572939999999999 | 5.673200000000000  |
| H  | 8.595760000000000  | 7.169290000000000  | 5.126090000000000  |
| H  | 7.257020000000000  | 7.113730000000000  | 6.284830000000000  |
| H  | 7.326110000000000  | 8.389930000000000  | 5.057800000000000  |
| H  | 16.353919999999999 | 13.308520000000000 | 6.729460000000000  |
| H  | 17.234639999999999 | 11.781620000000000 | 6.813920000000000  |
| H  | 16.386019999999998 | 12.228830000000000 | 5.325690000000000  |
| H  | 16.528099999999998 | 9.756860000000000  | 9.281100000000000  |
| H  | 16.215199999999999 | 8.590630000000001  | 7.984910000000000  |
| H  | 17.206340000000001 | 10.015670000000000 | 7.667220000000000  |
| H  | 14.828230000000000 | 14.656169999999999 | 5.775270000000000  |
| H  | 14.568090000000000 | 13.336710000000000 | 4.623090000000000  |

|   |                    |                    |                   |
|---|--------------------|--------------------|-------------------|
| H | 13.400539999999999 | 14.653130000000001 | 4.725220000000000 |
| H | 4.903530000000000  | 11.418049999999999 | 8.697050000000001 |
| H | 5.837460000000000  | 12.806710000000001 | 9.255540000000000 |
| H | 5.040570000000000  | 12.849570000000000 | 7.669840000000000 |
| H | 5.806780000000000  | 8.431350000000000  | 7.465310000000000 |
| H | 4.770190000000000  | 9.867960000000000  | 7.442610000000000 |
| H | 5.443190000000000  | 9.246680000000000  | 5.935330000000000 |

Transition Metal: Ni; Functional Group: CH3; Adsorbate: O

|    |                    |                    |                    |
|----|--------------------|--------------------|--------------------|
| Ni | 10.977940000000000 | 11.004849999999999 | 6.832900000000000  |
| C  | 10.445449999999999 | 15.240349999999999 | 7.582600000000000  |
| C  | 9.939030000000000  | 13.867550000000000 | 7.504930000000000  |
| C  | 8.583290000000000  | 13.456280000000000 | 7.614620000000000  |
| C  | 11.596700000000000 | 6.902560000000000  | 8.096830000000001  |
| C  | 11.994059999999999 | 8.314510000000000  | 8.064920000000001  |
| C  | 13.271160000000000 | 8.833900000000000  | 8.405849999999999  |
| C  | 10.348470000000001 | 6.823330000000000  | 7.497820000000000  |
| C  | 9.946520000000000  | 8.194559999999999  | 7.183740000000000  |
| C  | 11.752860000000000 | 15.214600000000001 | 7.121770000000000  |
| C  | 8.656630000000000  | 8.622109999999999  | 6.777320000000000  |
| C  | 15.200110000000000 | 11.619009999999999 | 7.006990000000000  |
| C  | 12.076250000000000 | 13.815890000000000 | 6.861340000000000  |
| C  | 13.807200000000000 | 12.040150000000001 | 6.853150000000000  |
| C  | 15.176019999999999 | 10.413300000000000 | 7.692110000000000  |
| C  | 13.765580000000000 | 10.058040000000000 | 7.877070000000000  |
| C  | 13.347000000000000 | 13.318989999999999 | 6.453810000000000  |
| C  | 6.773470000000000  | 11.618350000000000 | 7.699550000000000  |
| C  | 8.151680000000001  | 12.103560000000000 | 7.574590000000000  |
| C  | 6.780530000000000  | 10.283420000000000 | 7.326040000000000  |
| C  | 8.174010000000001  | 9.926489999999999  | 7.076680000000000  |
| C  | 9.785410000000001  | 16.446100000000001 | 8.208580000000000  |
| C  | 7.514640000000000  | 14.542610000000000 | 7.576230000000000  |
| C  | 12.398270000000000 | 5.717550000000000  | 8.574540000000001  |
| C  | 14.137560000000001 | 8.067790000000000  | 9.394330000000000  |
| C  | 9.538250000000000  | 5.563040000000000  | 7.333130000000000  |
| C  | 12.687880000000000 | 16.395710000000001 | 7.081020000000000  |
| C  | 7.757160000000000  | 7.670220000000000  | 6.005050000000000  |
| C  | 16.444970000000001 | 12.370780000000000 | 6.611350000000000  |
| C  | 16.395150000000001 | 9.600840000000000  | 8.051399999999999  |
| C  | 14.217810000000000 | 14.201140000000001 | 5.573920000000000  |
| C  | 5.578650000000000  | 12.331300000000001 | 8.287739999999999  |
| C  | 5.587310000000000  | 9.363519999999999  | 7.350860000000000  |
| N  | 10.989220000000000 | 13.026790000000000 | 7.169960000000000  |
| N  | 10.965999999999999 | 9.059469999999999  | 7.522430000000000  |
| N  | 12.974790000000000 | 11.061299999999999 | 7.360350000000000  |
| N  | 8.977020000000000  | 11.025720000000000 | 7.295290000000000  |
| O  | 11.008870000000000 | 10.839800000000000 | 5.119000000000000  |
| H  | 9.093420000000000  | 16.165080000000000 | 9.013280000000000  |
| H  | 10.543770000000000 | 17.107270000000000 | 8.654480000000000  |
| H  | 9.219150000000001  | 17.058969999999999 | 7.485310000000000  |
| H  | 6.625410000000000  | 14.191060000000000 | 7.043810000000000  |
| H  | 7.191140000000000  | 14.881280000000000 | 8.574780000000001  |
| H  | 7.874110000000000  | 15.420249999999999 | 7.030480000000000  |
| H  | 12.464940000000000 | 5.660440000000000  | 9.673940000000000  |
| H  | 11.947150000000001 | 4.777670000000000  | 8.229590000000000  |
| H  | 13.427790000000000 | 5.735520000000000  | 8.188310000000000  |
| H  | 14.769450000000001 | 8.763960000000001  | 9.958769999999999  |
| H  | 13.504940000000000 | 7.550660000000000  | 10.125999999999999 |
| H  | 14.801349999999999 | 7.312970000000000  | 8.942170000000001  |
| H  | 9.419390000000000  | 5.268350000000000  | 6.277470000000000  |
| H  | 10.009910000000000 | 4.719760000000000  | 7.854700000000000  |
| H  | 8.527020000000000  | 5.670320000000000  | 7.753670000000000  |
| H  | 12.291079999999999 | 17.230989999999998 | 7.675030000000000  |
| H  | 13.683109999999999 | 16.152170000000002 | 7.481240000000000  |
| H  | 12.834110000000001 | 16.779789999999998 | 6.057190000000000  |
| H  | 8.363230000000000  | 7.027370000000000  | 5.353830000000000  |
| H  | 7.133630000000000  | 7.010740000000000  | 6.630000000000000  |
| H  | 7.082830000000000  | 8.239060000000000  | 5.352780000000000  |
| H  | 16.450080000000000 | 13.395400000000000 | 7.013700000000000  |
| H  | 17.344580000000001 | 11.874590000000000 | 6.998620000000000  |
| H  | 16.561640000000001 | 12.452660000000000 | 5.518340000000000  |
| H  | 16.635069999999999 | 9.639200000000001  | 9.127599999999999  |
| H  | 16.274950000000000 | 8.541119999999999  | 7.784170000000000  |
| H  | 17.279869999999999 | 9.965210000000001  | 7.511710000000000  |
| H  | 14.970160000000000 | 14.795190000000000 | 6.117100000000000  |



|   |                    |                    |                   |
|---|--------------------|--------------------|-------------------|
| H | 14.755660000000001 | 13.585129999999999 | 4.841560000000000 |
| H | 13.593600000000000 | 14.900160000000000 | 5.004520000000000 |
| H | 4.894910000000000  | 11.608160000000000 | 8.756309999999999 |
| H | 5.869970000000000  | 13.046820000000000 | 9.067740000000001 |
| H | 4.987420000000000  | 12.884670000000000 | 7.537310000000000 |
| H | 5.804170000000000  | 8.414190000000000  | 7.863310000000000 |
| H | 4.740980000000000  | 9.831350000000000  | 7.872580000000000 |
| H | 5.231950000000000  | 9.111730000000000  | 6.337620000000000 |

Transition Metal: Ni; Functional Group: CH3; Adsorbate: OH

|    |                    |                    |                    |
|----|--------------------|--------------------|--------------------|
| Ni | 10.976360000000000 | 11.052560000000000 | 7.241740000000000  |
| C  | 10.504670000000000 | 15.196500000000000 | 7.670250000000000  |
| C  | 9.982350000000000  | 13.829300000000000 | 7.707300000000000  |
| C  | 8.642049999999999  | 13.426420000000000 | 7.932850000000000  |
| C  | 11.565790000000000 | 6.994130000000000  | 8.186220000000000  |
| C  | 11.957620000000000 | 8.403820000000000  | 8.215120000000001  |
| C  | 13.211140000000000 | 8.921410000000000  | 8.618399999999999  |
| C  | 10.406180000000001 | 6.916680000000000  | 7.428900000000000  |
| C  | 10.027580000000000 | 8.288029999999999  | 7.097450000000000  |
| C  | 11.728899999999999 | 15.144690000000001 | 7.020660000000000  |
| C  | 8.779180000000000  | 8.718380000000000  | 6.595390000000000  |
| C  | 15.108420000000001 | 11.571300000000001 | 6.970480000000000  |
| C  | 12.021839999999999 | 13.737959999999999 | 6.785350000000000  |
| C  | 13.715220000000000 | 11.973940000000001 | 6.794250000000000  |
| C  | 15.100870000000000 | 10.460240000000001 | 7.801410000000000  |
| C  | 13.698560000000001 | 10.117509999999999 | 8.036550000000000  |
| C  | 13.248710000000001 | 13.212610000000000 | 6.303430000000000  |
| C  | 6.844800000000000  | 11.577800000000000 | 7.775460000000000  |
| C  | 8.219010000000001  | 12.083760000000000 | 7.768080000000000  |
| C  | 6.874160000000000  | 10.315530000000001 | 7.202240000000000  |
| C  | 8.274800000000001  | 9.987940000000000  | 6.975480000000000  |
| C  | 9.944559999999999  | 16.434930000000001 | 8.330650000000000  |
| C  | 7.585740000000000  | 14.503640000000001 | 8.130070000000000  |
| C  | 12.320840000000000 | 5.818000000000000  | 8.751150000000001  |
| C  | 14.047590000000000 | 8.185860000000000  | 9.650910000000000  |
| C  | 9.631930000000001  | 5.659280000000000  | 7.128400000000000  |
| C  | 12.639989999999999 | 16.319630000000000 | 6.776320000000000  |
| C  | 7.959590000000000  | 7.817420000000000  | 5.690680000000000  |
| C  | 16.336819999999999 | 12.273709999999999 | 6.453540000000000  |
| C  | 16.319360000000000 | 9.691179999999999  | 8.245310000000000  |
| C  | 14.062160000000000 | 14.011170000000000 | 5.302470000000000  |
| C  | 5.617560000000000  | 12.193550000000000 | 8.406910000000000  |
| C  | 5.684080000000000  | 9.409480000000000  | 7.020810000000000  |
| N  | 10.983400000000000 | 12.970630000000000 | 7.267080000000000  |
| N  | 10.990320000000001 | 9.150539999999999  | 7.571330000000000  |
| N  | 12.898009999999999 | 11.058410000000000 | 7.423130000000000  |
| N  | 9.060400000000000  | 11.048249999999999 | 7.376910000000000  |
| O  | 11.022650000000001 | 10.871890000000000 | 5.204590000000000  |
| H  | 10.354640000000000 | 11.504260000000000 | 4.874440000000000  |
| H  | 9.369400000000001  | 16.196130000000000 | 9.234460000000000  |
| H  | 10.763970000000000 | 17.100919999999999 | 8.639600000000000  |
| H  | 9.290310000000000  | 17.028269999999999 | 7.667670000000000  |
| H  | 6.640500000000000  | 14.219189999999999 | 7.660910000000000  |
| H  | 7.378590000000000  | 14.716040000000000 | 9.193300000000001  |
| H  | 7.886460000000000  | 15.442259999999999 | 7.658610000000000  |
| H  | 12.329090000000001 | 5.805720000000000  | 9.853330000000000  |
| H  | 11.873250000000001 | 4.871290000000000  | 8.420820000000001  |
| H  | 13.370320000000000 | 5.806290000000000  | 8.419240000000000  |
| H  | 14.664800000000000 | 8.897069999999999  | 10.213530000000000 |
| H  | 13.395289999999999 | 7.686010000000000  | 10.377860000000000 |
| H  | 14.723030000000000 | 7.420000000000000  | 9.235440000000001  |
| H  | 9.627630000000000  | 5.413010000000000  | 6.054150000000000  |
| H  | 10.058130000000000 | 4.797250000000000  | 7.658290000000000  |
| H  | 8.580909999999999  | 5.739970000000000  | 7.445560000000000  |
| H  | 12.283149999999999 | 17.210400000000000 | 7.311140000000000  |
| H  | 13.670170000000001 | 16.125520000000002 | 7.111170000000000  |
| H  | 12.692430000000000 | 16.592390000000002 | 5.709320000000000  |
| H  | 8.627120000000000  | 7.213710000000000  | 5.062680000000000  |
| H  | 7.283130000000000  | 7.124690000000000  | 6.217320000000000  |
| H  | 7.346330000000000  | 8.425490000000000  | 5.013500000000000  |
| H  | 16.364170000000001 | 13.331820000000000 | 6.757040000000000  |
| H  | 17.250550000000000 | 11.808040000000000 | 6.845340000000000  |
| H  | 16.403359999999999 | 12.250830000000001 | 5.354050000000000  |
| H  | 16.516919999999999 | 9.788430000000000  | 9.325710000000001  |
| H  | 16.225739999999998 | 8.616429999999999  | 8.028409999999999  |
| H  | 17.216840000000001 | 10.043730000000000 | 7.719840000000000  |

|   |                    |                    |                   |
|---|--------------------|--------------------|-------------------|
| H | 14.843120000000001 | 14.649450000000000 | 5.747360000000000 |
| H | 14.555980000000000 | 13.330560000000000 | 4.596930000000000 |
| H | 13.402340000000001 | 14.659509999999999 | 4.712850000000000 |
| H | 4.928940000000000  | 11.403969999999999 | 8.741740000000000 |
| H | 5.866420000000000  | 12.795170000000001 | 9.290620000000001 |
| H | 5.045750000000000  | 12.838609999999999 | 7.716460000000000 |
| H | 5.841180000000000  | 8.418530000000001  | 7.474470000000000 |
| H | 4.786490000000000  | 9.843389999999999  | 7.481690000000000 |
| H | 5.444570000000000  | 9.244149999999999  | 5.957890000000000 |

Transition Metal: Ni; Functional Group: CH3; Adsorbate: OOH

|   |                    |                    |                    |
|---|--------------------|--------------------|--------------------|
| C | 10.977940000000000 | 11.004849999999999 | 6.832900000000000  |
| C | 10.445449999999999 | 15.240349999999999 | 7.582600000000000  |
| C | 9.939030000000000  | 13.867550000000000 | 7.504930000000000  |
| C | 8.583290000000000  | 13.456280000000000 | 7.614620000000000  |
| C | 11.596700000000000 | 6.902560000000000  | 8.096830000000001  |
| C | 11.994059999999999 | 8.314510000000000  | 8.064920000000001  |
| C | 13.271160000000000 | 8.833900000000000  | 8.405849999999999  |
| C | 10.348470000000001 | 6.823330000000000  | 7.497820000000000  |
| C | 9.946520000000000  | 8.194559999999999  | 7.183740000000000  |
| C | 11.752860000000000 | 15.214600000000001 | 7.121770000000000  |
| C | 8.656630000000000  | 8.622109999999999  | 6.777320000000000  |
| C | 15.200110000000000 | 11.619009999999999 | 7.006990000000000  |
| C | 12.076250000000000 | 13.815890000000000 | 6.861340000000000  |
| C | 13.807200000000000 | 12.040150000000001 | 6.853150000000000  |
| C | 15.176019999999999 | 10.413300000000000 | 7.692110000000000  |
| C | 13.765580000000000 | 10.058040000000000 | 7.877070000000000  |
| C | 13.347000000000000 | 13.318989999999999 | 6.453810000000000  |
| C | 6.773470000000000  | 11.618350000000000 | 7.699550000000000  |
| C | 8.151680000000001  | 12.103560000000000 | 7.574590000000000  |
| C | 6.780530000000000  | 10.283420000000000 | 7.326040000000000  |
| C | 8.174010000000001  | 9.926489999999999  | 7.076680000000000  |
| C | 9.785410000000001  | 16.446100000000001 | 8.208580000000000  |
| C | 7.514640000000000  | 14.542610000000000 | 7.576230000000000  |
| C | 12.398270000000000 | 5.717550000000000  | 8.574540000000001  |
| C | 14.137560000000001 | 8.067790000000000  | 9.394330000000000  |
| C | 9.538250000000000  | 5.563040000000000  | 7.333130000000000  |
| C | 12.687880000000000 | 16.395710000000001 | 7.081020000000000  |
| C | 7.757160000000000  | 7.670220000000000  | 6.005050000000000  |
| C | 16.444970000000001 | 12.370780000000000 | 6.611350000000000  |
| C | 16.395150000000001 | 9.600840000000000  | 8.051399999999999  |
| C | 14.217810000000000 | 14.201140000000001 | 5.573920000000000  |
| C | 5.578650000000000  | 12.331300000000001 | 8.287739999999999  |
| C | 5.587310000000000  | 9.363519999999999  | 7.350860000000000  |
| N | 10.989220000000000 | 13.026790000000000 | 7.169960000000000  |
| N | 10.965999999999999 | 9.059469999999999  | 7.522430000000000  |
| N | 12.974790000000000 | 11.061299999999999 | 7.360350000000000  |
| N | 8.977020000000000  | 11.025720000000000 | 7.295290000000000  |
| H | 9.093420000000000  | 16.165080000000000 | 9.013280000000000  |
| H | 10.543770000000000 | 17.107270000000000 | 8.654480000000000  |
| H | 9.219150000000001  | 17.058969999999999 | 7.485310000000000  |
| H | 6.625410000000000  | 14.191060000000000 | 7.043810000000000  |
| H | 7.191140000000000  | 14.881280000000000 | 8.574780000000001  |
| H | 7.874110000000000  | 15.420249999999999 | 7.030480000000000  |
| H | 12.464940000000000 | 5.660440000000000  | 9.673940000000000  |
| H | 11.947150000000001 | 4.777670000000000  | 8.229590000000000  |
| H | 13.427790000000000 | 5.735520000000000  | 8.188310000000000  |
| H | 14.769450000000001 | 8.763960000000001  | 9.958769999999999  |
| H | 13.504940000000000 | 7.550660000000000  | 10.125999999999999 |
| H | 14.801349999999999 | 7.312970000000000  | 8.942170000000001  |
| H | 9.419390000000000  | 5.268350000000000  | 6.277470000000000  |
| H | 10.009910000000000 | 4.719760000000000  | 7.854700000000000  |
| H | 8.527020000000000  | 5.670320000000000  | 7.753670000000000  |
| H | 12.291079999999999 | 17.230989999999998 | 7.675030000000000  |
| H | 13.683109999999999 | 16.152170000000002 | 7.481240000000000  |
| H | 12.834110000000001 | 16.779789999999998 | 6.057190000000000  |
| H | 8.363230000000000  | 7.027370000000000  | 5.353830000000000  |
| H | 7.133630000000000  | 7.010740000000000  | 6.630000000000000  |
| H | 7.082830000000000  | 8.239060000000000  | 5.352780000000000  |
| H | 16.450080000000000 | 13.395400000000000 | 7.013700000000000  |
| H | 17.344580000000001 | 11.874590000000000 | 6.998620000000000  |
| H | 16.561640000000001 | 12.452660000000000 | 5.518340000000000  |
| H | 16.635069999999999 | 9.639200000000001  | 9.127599999999999  |
| H | 16.274950000000000 | 8.541119999999999  | 7.784170000000000  |
| H | 17.279869999999999 | 9.965210000000001  | 7.511710000000000  |
| H | 14.970160000000000 | 14.795190000000000 | 6.117100000000000  |
| H | 14.755660000000001 | 13.585129999999999 | 4.841560000000000  |

|   |                    |                    |                   |
|---|--------------------|--------------------|-------------------|
| H | 13.593600000000000 | 14.900160000000000 | 5.004520000000000 |
| H | 4.894910000000000  | 11.608160000000000 | 8.756309999999999 |
| H | 5.869970000000000  | 13.046820000000000 | 9.067740000000001 |
| H | 4.987420000000000  | 12.884670000000000 | 7.537310000000000 |
| H | 5.804170000000000  | 8.414190000000000  | 7.863310000000000 |
| H | 4.740980000000000  | 9.831350000000000  | 7.872580000000000 |
| H | 5.231950000000000  | 9.111730000000000  | 6.337620000000000 |
| O | 11.015693096943659 | 10.803390295811479 | 4.740917043267457 |
| H | 9.742165450991216  | 9.674670933949566  | 3.897487598227776 |
| O | 9.834287892964372  | 10.651673130719761 | 3.937954704814478 |

Transition Metal: Ni; Functional Group: F; Adsorbate: Clean

|    |                    |                    |                    |
|----|--------------------|--------------------|--------------------|
| Ni | 0.000000000000000  | -0.000121742969490 | 0.002638688430130  |
| C  | 0.682483872257452  | 4.225334935720426  | -0.007891403185397 |
| C  | 1.101840445133540  | 2.845306539356926  | -0.005381265883512 |
| C  | 2.423175846513780  | 2.422906118700956  | -0.000597137437580 |
| C  | -0.682470844846200 | -4.225413631569033 | -0.007294178605012 |
| C  | -1.101884204525852 | -2.845365373632099 | -0.002398825672832 |
| C  | -2.423339369841763 | -2.423038828200134 | -0.000497853363318 |
| C  | 0.682470844846200  | -4.225413631569033 | -0.007294178605012 |
| C  | 1.101884204525850  | -2.845365373632099 | -0.002398825672832 |
| C  | -0.682483872257450 | 4.225334935720426  | -0.007891403185397 |
| C  | 2.423339369841762  | -2.423038828200134 | -0.000497853363318 |
| C  | -4.226180972644455 | 0.682589536468134  | 0.004887930191230  |
| C  | -1.101840445133536 | 2.845306539356926  | -0.005381265883512 |
| C  | -2.846017835815427 | 1.101770335928360  | 0.005003496804508  |
| C  | -4.226344008989965 | -0.682372692154857 | 0.004622703837400  |
| C  | -2.846193095875236 | -1.101780269840798 | 0.004804743091032  |
| C  | -2.423175846513775 | 2.422906118700956  | -0.000597137437580 |
| C  | 4.226180972644462  | 0.682589536468134  | 0.004887930191230  |
| C  | 2.846017835815430  | 1.101770335928360  | 0.005003496804508  |
| C  | 4.226344008989962  | -0.682372692154857 | 0.004622703837400  |
| C  | 2.846193095875234  | -1.101780269840798 | 0.004804743091032  |
| N  | 0.000000000000000  | 1.994252621346674  | -0.004731785138128 |
| N  | 0.000000000000000  | -1.994397356617206 | 0.000011115054486  |
| N  | -1.995121511242942 | -0.000069182012568 | 0.005759927450422  |
| N  | 1.995121511242940  | -0.000069182012568 | 0.005759927450422  |
| F  | 5.306772237171694  | -1.482371809882153 | 0.003078457037164  |
| F  | -5.306368776947579 | 1.482956189785264  | 0.003378689184674  |
| F  | -5.306772237171698 | -1.482371809882153 | 0.003078457037164  |
| F  | -1.482818196466837 | 5.305505610927280  | -0.005969127385718 |
| F  | 1.482818196466842  | 5.305505610927280  | -0.005969127385718 |
| F  | 5.306368776947582  | 1.482956189785264  | 0.003378689184674  |
| F  | -1.482757045765130 | -5.305614313583975 | -0.008706459744662 |
| F  | 1.482757045765128  | -5.305614313583975 | -0.008706459744662 |
| F  | -3.385480995609370 | 3.385552161432204  | -0.000747329289538 |
| F  | 3.385480995609370  | 3.385552161432204  | -0.000747329289538 |
| F  | -3.385633984378213 | -3.385552088323823 | -0.004166376202368 |
| F  | 3.385633984378216  | -3.385552088323823 | -0.004166376202368 |

Transition Metal: Ni; Functional Group: F; Adsorbate: O

|    |                    |                    |                    |
|----|--------------------|--------------------|--------------------|
| Ni | 0.000000000000000  | -0.001280508984387 | 0.435456257184944  |
| C  | 0.685684198276196  | 4.267020930293440  | -0.013567743705732 |
| C  | 1.108526135380126  | 2.885587733726282  | -0.013577739083158 |
| C  | 2.432529436118270  | 2.431674210629224  | -0.007850795198152 |
| C  | -0.685697264034445 | -4.268635992293381 | -0.014299649881345 |
| C  | -1.108596331466330 | -2.887241466426900 | -0.015190495281680 |
| C  | -2.432617635643584 | -2.433297361745907 | -0.009210461434858 |
| C  | 0.685697264034444  | -4.268635992293381 | -0.014299649881345 |
| C  | 1.108596331466338  | -2.887241466426900 | -0.015190495281680 |
| C  | -0.685684198276199 | 4.267020930293440  | -0.013567743705732 |
| C  | 2.432617635643592  | -2.433297361745907 | -0.009210461434858 |
| C  | -4.268145726575870 | 0.684927358909994  | -0.006982472598150 |
| C  | -1.108526135380117 | 2.885587733726282  | -0.013577739083158 |
| C  | -2.886718573401062 | 1.107744507528788  | -0.009878834178036 |
| C  | -4.268168065916667 | -0.686474876176227 | -0.007455584479702 |
| C  | -2.886763047370049 | -1.109343438887024 | -0.010639054946296 |
| C  | -2.432529436118262 | 2.431674210629224  | -0.007850795198152 |
| C  | 4.268145726575874  | 0.684927358909994  | -0.006982472598150 |
| C  | 2.886718573401064  | 1.107744507528788  | -0.009878834178036 |
| C  | 4.268168065916650  | -0.686474876176227 | -0.007455584479702 |
| C  | 2.886763047370046  | -1.109343438887024 | -0.010639054946296 |
| N  | 0.000000000000000  | 2.055239819767264  | -0.025097216895924 |
| N  | 0.000000000000000  | -2.056976316418918 | -0.027282906753317 |
| N  | -2.056554641970997 | -0.000810674152694 | -0.022731198560706 |
| N  | 2.056554641970998  | -0.000810674152694 | -0.022731198560706 |
| F  | 5.354980628107312  | -1.478012175995591 | -0.012235464578300 |
| F  | -5.354903296449333 | 1.476559688724626  | -0.011282945757937 |
| F  | -5.354980628107313 | -1.478012175995591 | -0.012235464578300 |
| F  | -1.477233957152329 | 5.353855676289976  | -0.018952408693306 |
| F  | 1.477233957152338  | 5.353855676289976  | -0.018952408693306 |
| F  | 5.354903296449334  | 1.476559688724626  | -0.011282945757937 |
| F  | -1.477210301468336 | -5.355489542798439 | -0.018627978780515 |
| F  | 1.477210301468348  | -5.355489542798439 | -0.018627978780515 |
| F  | -3.394965986592304 | 3.394294648182218  | 0.000833633347576  |
| F  | 3.394965986592304  | 3.394294648182218  | 0.000833633347576  |
| F  | -3.395089777130107 | -3.395888048061998 | -0.000310311490698 |
| F  | 3.395089777130102  | -3.395888048061998 | -0.000310311490698 |
| O  | 0.000000000000000  | -0.003545349856523 | 2.169712877065736  |

Transition Metal: Ni; Functional Group: F; Adsorbate: OH

|    |                    |                    |                    |
|----|--------------------|--------------------|--------------------|
| Ni | 0.000000000000000  | -0.002596833680808 | 0.249246955160302  |
| C  | 0.685865374568358  | 4.293850439107364  | -0.006294519865442 |
| C  | 1.105059847298980  | 2.910494116282176  | -0.004080293777762 |
| C  | 2.424783491135010  | 2.437684289477994  | -0.007915109775210 |
| C  | -0.685346858601058 | -4.291321242761159 | -0.008479434975811 |
| C  | -1.102890727605875 | -2.906155341365555 | -0.019629729578262 |
| C  | -2.421868250388254 | -2.433311137583058 | -0.008389345619008 |
| C  | 0.685346858601060  | -4.291321242761159 | -0.008479434975811 |
| C  | 1.102890727605878  | -2.906155341365555 | -0.019629729578262 |
| C  | -0.685865374568348 | 4.293850439107364  | -0.006294519865442 |
| C  | 2.421868250388256  | -2.433311137583058 | -0.008389345619008 |
| C  | -4.254499568419121 | 0.686382744442492  | 0.008965594102902  |
| C  | -1.105059847298975 | 2.910494116282176  | -0.004080293777762 |
| C  | -2.872738849769785 | 1.109929694719808  | -0.013799194061118 |
| C  | -4.253107490728587 | -0.683611777808345 | 0.011905684679036  |
| C  | -2.870427222543274 | -1.104893856337206 | -0.010921561420012 |
| C  | -2.424783491135003 | 2.437684289477994  | -0.007915109775210 |
| C  | 4.254499568419110  | 0.686382744442492  | 0.008965594102902  |
| C  | 2.872738849769786  | 1.109929694719808  | -0.013799194061118 |
| C  | 4.253107490728598  | -0.683611777808345 | 0.011905684679036  |
| C  | 2.870427222543264  | -1.104893856337206 | -0.010921561420012 |
| N  | 0.000000000000000  | 2.078218363756594  | -0.006286855324712 |
| N  | 0.000000000000000  | -2.075705594171314 | -0.036204983624094 |
| N  | -2.035990553696493 | 0.002511771799668  | -0.050032045273493 |
| N  | 2.035990553696482  | 0.002511771799668  | -0.050032045273493 |
| F  | 5.341241124756833  | -1.474692251596668 | 0.014813784486006  |
| F  | -5.343885776618549 | 1.476284434952062  | 0.011083335539666  |
| F  | -5.341241124756831 | -1.474692251596668 | 0.014813784486006  |
| F  | -1.479398298781664 | 5.380447951126632  | -0.010679828888453 |
| F  | 1.479398298781658  | 5.380447951126632  | -0.010679828888453 |
| F  | 5.343885776618528  | 1.476284434952062  | 0.011083335539666  |
| F  | -1.480414963211292 | -5.376654287353841 | -0.001774708529531 |
| F  | 1.480414963211282  | -5.376654287353841 | -0.001774708529531 |
| F  | -3.394004484480796 | 3.391043380902878  | 0.003467616061610  |
| F  | 3.394004484480808  | 3.391043380902878  | 0.003467616061610  |
| F  | -3.391913216713146 | -3.384644045393202 | 0.013156785718524  |
| F  | 3.391913216713142  | -3.384644045393202 | 0.013156785718524  |
| H  | 0.000000000000000  | 0.867553531758136  | 2.443816828804916  |
| O  | 0.000000000000000  | -0.057039232886396 | 2.126263997335716  |



Transition Metal: Ni; Functional Group: F; Adsorbate: OOH

|    |                    |                    |                    |
|----|--------------------|--------------------|--------------------|
| Ni | -0.009880891798624 | 0.013993942621902  | 0.322044197822674  |
| C  | 0.673593173319782  | 4.274735000755272  | -0.032960880181098 |
| C  | 1.096743439751878  | 2.893624874242994  | -0.035654733908606 |
| C  | 2.423089599965602  | 2.441466053636462  | -0.005568787060662 |
| C  | -0.698737419674536 | -4.248632968523955 | -0.032967962198236 |
| C  | -1.123378275990913 | -2.868010096228954 | -0.041778495611042 |
| C  | -2.449382635801907 | -2.414821706382494 | -0.023798036201694 |
| C  | 0.672837121745210  | -4.248017947132617 | -0.029151961104664 |
| C  | 1.096099849692288  | -2.867021434878229 | -0.034734906859844 |
| C  | -0.698084509071595 | 4.275470479728479  | -0.035386302370286 |
| C  | 2.422282486293232  | -2.415063269143502 | -0.005434807840058 |
| C  | -4.296157303245780 | 0.699033652605104  | -0.021754254800335 |
| C  | -1.123229866958713 | 2.895143017945024  | -0.040805819811844 |
| C  | -2.912563478822172 | 1.120484582984634  | -0.012498418080018 |
| C  | -4.295712747074196 | -0.671608676730028 | -0.023224522598696 |
| C  | -2.912108708679678 | -1.092537758211854 | -0.014402845472878 |
| C  | -2.449340600882678 | 2.442453995951964  | -0.020791438331492 |
| C  | 4.2711101069067550 | 0.698115324596212  | 0.007076509525924  |
| C  | 2.887803076474358  | 1.120315590240260  | 0.015815990192896  |
| C  | 4.270308905249620  | -0.672772366278288 | 0.006213007753812  |
| C  | 2.887069285706740  | -1.094081286017207 | 0.015273082592142  |
| N  | -0.013764638819920 | 2.063175639708074  | -0.054861682747283 |
| N  | -0.013872695374382 | -2.036126728123065 | -0.055985768856736 |
| N  | -2.083110353672865 | 0.014186176013642  | -0.007783907590106 |
| N  | 2.058537747918604  | 0.013364184081120  | 0.024079906222290  |
| F  | 5.357691697485122  | -1.466170853468235 | -0.011966659989586 |
| F  | -5.384932576871279 | 1.490695407079690  | -0.037870013826290 |
| F  | -5.383295337142940 | -1.465115479825410 | -0.040434994514008 |
| F  | -1.485909202671863 | 5.366603024067640  | -0.031855226438320 |
| F  | 1.463481010327614  | 5.364665535643443  | -0.025781908493272 |
| F  | 5.359890032354619  | 1.4897448299999836 | -0.010237821218141 |
| F  | -1.486814620868625 | -5.339725588032609 | -0.026381546663434 |
| F  | 1.462141180959580  | -5.338216902597599 | -0.016891175415724 |
| F  | -3.408285914513026 | 3.410602023629972  | -0.005716940773886 |
| F  | 3.382016020586348  | 3.409900986438724  | 0.001714773679456  |
| F  | -3.408732523190380 | -3.382823045144626 | -0.013531728646138 |
| F  | 3.380866686540434  | -3.383762742734909 | 0.000097037958904  |
| H  | -0.719227522926900 | 0.016221144405070  | 3.887441077056266  |
| O  | 0.135621594463186  | 0.014030677355468  | 2.219772396138536  |
| O  | -1.068925200859901 | 0.012538818564810  | 2.966911091916474  |

Transition Metal: Ni; Functional Group: H; Adsorbate: Clean

|    |                    |                    |                    |
|----|--------------------|--------------------|--------------------|
| Ni | 0.000000000000000  | -0.000085706898826 | 0.009226498456724  |
| C  | 0.683301931926464  | 4.214322143484416  | -0.011161327503718 |
| C  | 1.099268078040668  | 2.830001403467386  | -0.002151854053730 |
| C  | 2.426827606050124  | 2.426612881970268  | 0.001654556454946  |
| C  | -0.683299874907888 | -4.214285199524861 | -0.009117368606617 |
| C  | -1.099316013605218 | -2.830070051955587 | 0.001415203000734  |
| C  | -2.426937530459249 | -2.426800194007615 | 0.003545652403596  |
| C  | 0.683299874907894  | -4.214285199524861 | -0.009117368606617 |
| C  | 1.099316013605218  | -2.830070051955587 | 0.001415203000734  |
| C  | -0.683301931926465 | 4.214322143484416  | -0.011161327503718 |
| C  | 2.426937530459254  | -2.426800194007615 | 0.003545652403596  |
| C  | -4.214884585894797 | 0.683468041357518  | 0.003104483369144  |
| C  | -1.099268078040669 | 2.830001403467386  | -0.002151854053730 |
| C  | -2.830517359776380 | 1.099227766941928  | 0.007530374635506  |
| C  | -4.215088203204363 | -0.683204652144560 | 0.003320191877514  |
| C  | -2.830841109453271 | -1.099238894034759 | 0.008191265803328  |
| C  | -2.426827606050121 | 2.426612881970268  | 0.001654556454946  |
| C  | 4.214884585894792  | 0.683468041357518  | 0.003104483369144  |
| C  | 2.830517359776370  | 1.099227766941928  | 0.007530374635506  |
| C  | 4.215088203204360  | -0.683204652144560 | 0.003320191877514  |
| C  | 2.830841109453264  | -1.099238894034759 | 0.008191265803328  |
| N  | 0.000000000000000  | 1.980451371098934  | 0.002023192290830  |
| N  | 0.000000000000000  | -1.980475590363177 | 0.006479377857136  |
| N  | -1.981007726807444 | -0.000173316245148 | 0.011064401318226  |
| N  | 1.981007726807446  | -0.000173316245148 | 0.011064401318226  |
| H  | 5.062341392365158  | -1.366422762246128 | -0.001749166792369 |
| H  | -5.061618259980280 | 1.367221018962158  | -0.002562173963927 |
| H  | -5.062341392365163 | -1.366422762246128 | -0.001749166792369 |
| H  | -1.367032332392199 | 5.061090977585135  | -0.015636397447857 |
| H  | 1.367032332392196  | 5.061090977585135  | -0.015636397447857 |
| H  | 5.061618259980288  | 1.367221018962158  | -0.002562173963927 |
| H  | -1.366906663612887 | -5.061205254590737 | -0.015976802218731 |
| H  | 1.366906663612884  | -5.061205254590737 | -0.015976802218731 |
| H  | -3.198200131623349 | 3.198141515668060  | -0.002009748710026 |
| H  | 3.198200131623342  | 3.198141515668060  | -0.002009748710026 |
| H  | -3.198253400628154 | -3.198420461605831 | -0.001480823868622 |
| H  | 3.198253400628160  | -3.198420461605831 | -0.001480823868622 |

Transition Metal: Ni; Functional Group: H; Adsorbate: O

|    |                    |                    |                    |
|----|--------------------|--------------------|--------------------|
| Ni | 0.000000000000000  | -0.000715513800898 | 0.467180270833938  |
| C  | 0.685279428454930  | 4.255343774197994  | -0.033102404850794 |
| C  | 1.105875361107054  | 2.867838041571970  | 0.005234416876852  |
| C  | 2.436324806077708  | 2.435335990072122  | 0.009830891907084  |
| C  | -0.685275611713021 | -4.257153179591562 | -0.032857181609110 |
| C  | -1.105873924724769 | -2.869618602417461 | 0.006188492853260  |
| C  | -2.436279535893426 | -2.437032115900433 | 0.009821698344268  |
| C  | 0.685275611713026  | -4.257153179591562 | -0.032857181609110 |
| C  | 1.105873924724772  | -2.869618602417461 | 0.006188492853260  |
| C  | -0.685279428454933 | 4.255343774197994  | -0.033102404850794 |
| C  | 2.436279535893426  | -2.437032115900433 | 0.009821698344268  |
| C  | -4.256760210764680 | 0.684315028010058  | -0.022941404986632 |
| C  | -1.105875361107064 | 2.867838041571970  | 0.005234416876852  |
| C  | -2.869030484636180 | 1.104988073647098  | 0.009745734375338  |
| C  | -4.256633837734391 | -0.686295958328941 | -0.023086127949068 |
| C  | -2.868927431603581 | -1.106768116528158 | 0.009649928405520  |
| C  | -2.436324806077710 | 2.435335990072122  | 0.009830891907084  |
| C  | 4.256760210764684  | 0.684315028010058  | -0.022941404986632 |
| C  | 2.869030484636180  | 1.104988073647098  | 0.009745734375338  |
| C  | 4.256633837734380  | -0.686295958328941 | -0.023086127949068 |
| C  | 2.868927431603578  | -1.106768116528158 | 0.009649928405520  |
| N  | 0.000000000000000  | 2.039668018277412  | 0.019028925132408  |
| N  | 0.000000000000000  | -2.041493297906879 | 0.020857305105814  |
| N  | -2.040815375710139 | -0.000847452857270 | 0.021021657286746  |
| N  | 2.040815375710124  | -0.000847452857270 | 0.021021657286746  |
| H  | 5.109895425885976  | -1.361780926462330 | -0.050032046849822 |
| H  | -5.110353139830048 | 1.359338437100138  | -0.049194873974784 |
| H  | -5.109895425885973 | -1.361780926462330 | -0.050032046849822 |
| H  | -1.360542330084705 | 5.108560777396174  | -0.063595312934673 |
| H  | 1.360542330084700  | 5.108560777396174  | -0.063595312934673 |
| H  | 5.110353139830042  | 1.359338437100138  | -0.049194873974784 |
| H  | -1.360584131977443 | -5.110280063712285 | -0.064247456442889 |
| H  | 1.360584131977436  | -5.110280063712285 | -0.064247456442889 |
| H  | -3.208479798320393 | 3.207695305300184  | 0.000473732178112  |
| H  | 3.208479798320396  | 3.207695305300184  | 0.000473732178112  |
| H  | -3.208459869595231 | -3.209394514073679 | 0.000226101308526  |
| H  | 3.208459869595230  | -3.209394514073679 | 0.000226101308526  |
| O  | 0.000000000000000  | 0.000431798583350  | 2.195531811051428  |

Transition Metal: Ni; Functional Group: H; Adsorbate: OH

|    |                    |                    |                    |
|----|--------------------|--------------------|--------------------|
| Ni | 0.000000000000000  | 0.002550597613574  | 0.141905882667026  |
| C  | 0.683958951042138  | 4.220929591557688  | -0.017625220732970 |
| C  | 1.102664319105798  | 2.837886074057390  | 0.001678059278510  |
| C  | 2.430980116279362  | 2.430243830010490  | 0.002326647672406  |
| C  | -0.683428549972330 | -4.218309749568467 | -0.013296397550167 |
| C  | -1.100342432403252 | -2.833072767988675 | 0.000642110804010  |
| C  | -2.428363277644216 | -2.426066794798334 | 0.008779249773360  |
| C  | 0.683428549972340  | -4.218309749568467 | -0.013296397550167 |
| C  | 1.100342432403252  | -2.833072767988675 | 0.000642110804010  |
| C  | -0.683958951042147 | 4.220929591557688  | -0.017625220732970 |
| C  | 2.428363277644206  | -2.426066794798334 | 0.008779249773360  |
| C  | -4.223523248935983 | 0.684516369402986  | -0.006867629275064 |
| C  | -1.102664319105799 | 2.837886074057390  | 0.001678059278510  |
| C  | -2.838661121137783 | 1.102457800261892  | -0.004907363939126 |
| C  | -4.222201329664092 | -0.682435563978785 | -0.003381837061244 |
| C  | -2.836618846958316 | -1.098452934686506 | 0.000176223313552  |
| C  | -2.430980116279351 | 2.430243830010490  | 0.002326647672406  |
| C  | 4.223523248935986  | 0.684516369402986  | -0.006867629275064 |
| C  | 2.838661121137788  | 1.102457800261892  | -0.004907363939126 |
| C  | 4.222201329664096  | -0.682435563978785 | -0.003381837061244 |
| C  | 2.836618846958312  | -1.098452934686506 | 0.000176223313552  |
| N  | 0.000000000000000  | 1.996300579091152  | 0.010161581338074  |
| N  | 0.000000000000000  | -1.993938296253713 | -0.002366459835024 |
| N  | -1.997947941790173 | 0.002504734098140  | -0.014210369768229 |
| N  | 1.997947941790170  | 0.002504734098140  | -0.014210369768229 |
| H  | 5.068728468935882  | -1.366248320147992 | -0.004725158670414 |
| H  | -5.071473291181894 | 1.366291516058280  | -0.011301515992674 |
| H  | -5.068728468935875 | -1.366248320147992 | -0.004725158670414 |
| H  | -1.366300588202201 | 5.068549252263782  | -0.033388302496789 |
| H  | 1.366300588202204  | 5.068549252263782  | -0.033388302496789 |
| H  | 5.071473291181898  | 1.366291516058280  | -0.011301515992674 |
| H  | -1.366675463292953 | -5.065006284831352 | -0.024865151038433 |
| H  | 1.366675463292960  | -5.065006284831352 | -0.024865151038433 |
| H  | -3.201686885711638 | 3.202292488498228  | 0.004423201038372  |
| H  | 3.201686885711636  | 3.202292488498228  | 0.004423201038372  |
| H  | -3.199314738410127 | -3.197850650674155 | 0.017602028589576  |
| H  | 3.199314738410128  | -3.197850650674155 | 0.017602028589576  |
| H  | 0.000000000000000  | 0.871699962284546  | 2.488462133989586  |
| O  | 0.000000000000000  | -0.055950021804495 | 2.179349713950358  |

Transition Metal: Ni; Functional Group: H; Adsorbate: OOH

|    |                    |                    |                    |
|----|--------------------|--------------------|--------------------|
| Ni | -0.001955979150336 | -0.001792584886623 | 0.073872161938522  |
| C  | 0.682399011520894  | 4.217237051969819  | -0.015646161775717 |
| C  | 1.098163647997676  | 2.832514205634952  | -0.008944209930320 |
| C  | 2.426279542990626  | 2.426884670043798  | -0.004010590950590 |
| C  | -0.685397352885218 | -4.217634681265057 | -0.016983667889445 |
| C  | -1.102199003841378 | -2.832774778623328 | -0.013537266860842 |
| C  | -2.430110142040920 | -2.427770184280391 | -0.010462798993702 |
| C  | 0.681107430733412  | -4.217177373696831 | -0.015141410922190 |
| C  | 1.097304142169980  | -2.832141197492358 | -0.010051944462158 |
| C  | -0.684686727997242 | 4.218544425705806  | -0.017136115897728 |
| C  | 2.425414260423098  | -2.427545704879222 | -0.003653849390948 |
| C  | -4.221970510044002 | 0.683128306570432  | -0.016055283279236 |
| C  | -1.102377997866103 | 2.834182253996480  | -0.012015321264206 |
| C  | -2.837499993122837 | 1.100249174742946  | -0.014185720902873 |
| C  | -4.221090468459787 | -0.684103599705242 | -0.016194876674902 |
| C  | -2.836675884148057 | -1.100042498735167 | -0.014062319754904 |
| C  | -2.430936701711197 | 2.428585774576958  | -0.009163170188450 |
| C  | 4.217993415428718  | 0.682767358308000  | -0.007592477462740 |
| C  | 2.833004159481126  | 1.099277785693558  | -0.006068025476050 |
| C  | 4.217778400379744  | -0.684026018037436 | -0.007184199618841 |
| C  | 2.832737492940606  | -1.100198834744262 | -0.005414195250966 |
| N  | -0.002568299121176 | 1.989653574685666  | -0.012662312458818 |
| N  | -0.002653081932682 | -1.989338313977992 | -0.016720759009510 |
| N  | -1.993521518884300 | 0.000022316051538  | -0.016842377448540 |
| N  | 1.990119686695912  | -0.000514414705538 | -0.010175857336606 |
| H  | 5.064487913867484  | -1.367619677688907 | -0.008124083299030 |
| H  | -5.069373827839676 | 1.365970164544524  | -0.019910552241569 |
| H  | -5.067660257188816 | -1.367852530387925 | -0.018776756410318 |
| H  | -1.367071640423273 | 5.066238901013785  | -0.025535936674487 |
| H  | 1.366554588424334  | 5.063507970602767  | -0.021868777833721 |
| H  | 5.064886572931721  | 1.366176938404326  | -0.009275055896410 |
| H  | -1.368617507924913 | -5.064612963771545 | -0.021409680269606 |
| H  | 1.365135221070522  | -5.063558574634188 | -0.017794919662890 |
| H  | -3.201999165183775 | 3.200428780507538  | -0.008370150302404 |
| H  | 3.197236455350616  | 3.198680672947092  | 0.000061471901700  |
| H  | -3.201023634610131 | -3.199625886012107 | -0.005474218310960 |
| H  | 3.196060798981026  | -3.199750920188947 | 0.002525060865206  |
| H  | -1.327557351122980 | 0.690011029561964  | 3.237649726840940  |
| O  | 0.182079645731156  | -0.000214598336406 | 2.335341583478874  |
| O  | -0.978795341619723 | -0.220346019512320 | 3.093685039075896  |

## Transition Metal: Ni; Functional Group: NH2; Adsorbate: Clean

|    |                    |                    |                    |
|----|--------------------|--------------------|--------------------|
| Ni | 0.007865240494938  | -0.013437712946015 | 0.016470442335992  |
| C  | 0.767547487854910  | 4.012758006078780  | -0.822255557598940 |
| C  | 1.162560952353868  | 2.632802673689450  | -0.652798617540419 |
| C  | 2.483383768936882  | 2.129698958663940  | -0.752073752245366 |
| C  | -0.660517264394404 | -4.056903412320432 | -0.744053200161872 |
| C  | -1.110080115449932 | -2.692739783344383 | -0.568231629295688 |
| C  | -2.419788582476144 | -2.207532093282985 | -0.740344565759585 |
| C  | 0.581633744877322  | -4.154769443245545 | -0.133337384560047 |
| C  | 0.918841961692736  | -2.825207047703195 | 0.339751526947122  |
| C  | -0.478293008042211 | 4.148143552072910  | -0.223771481139963 |
| C  | 2.165011753417750  | -2.448206930219758 | 0.886555693112538  |
| C  | -4.048809117832555 | 0.720781761124642  | 0.679982388779830  |
| C  | -0.898986799586655 | 2.827347510541882  | 0.182308500464114  |
| C  | -2.675417126221813 | 1.147094580248504  | 0.528470287903380  |
| C  | -4.135786032646976 | -0.563545312041626 | 0.161040208720988  |
| C  | -2.799468390680381 | -0.935005825942007 | -0.250116021611223 |
| C  | -2.200386139673025 | 2.476268521148094  | 0.629524552151848  |
| C  | 4.143469304948112  | 0.542596171028994  | 0.332428828116266  |
| C  | 2.832698424473204  | 0.885593014287880  | -0.190744628181875 |
| C  | 4.013421466541736  | -0.689825962991421 | 0.955712955018240  |
| C  | 2.654747744513828  | -1.135121470226771 | 0.731603135567898  |
| N  | 0.118999944558518  | 1.919794608470646  | -0.072511158032615 |
| N  | -0.109030053221236 | -1.945817172809580 | 0.046158246794228  |
| N  | -1.918749349744385 | 0.102254674538130  | 0.011084202750720  |
| N  | 1.936210427982596  | -0.137219909103798 | 0.081756887834256  |
| N  | 5.052507071662410  | -1.438115809104193 | 1.616985141962228  |
| N  | -5.139223567664651 | 1.516029513937324  | 1.168733940240528  |
| N  | -5.308007307231939 | -1.337406886753264 | 0.066356776446996  |
| N  | -1.243675983576459 | 5.349361612102612  | -0.109060578910274 |
| N  | 1.573256736330818  | 5.057024488613910  | -1.400949417702655 |
| N  | 5.318620203212512  | 1.299792696047242  | 0.236113138190620  |
| N  | -1.411080414415547 | -5.124279015905188 | -1.356951872991658 |
| N  | 1.357604943966088  | -5.316678118688252 | -0.010162650209172 |
| N  | -3.062147442729866 | 3.476766364331560  | 1.086561529005728  |
| N  | 3.532050747335332  | 2.959742601837476  | -1.226806944333532 |
| N  | -3.437970246332608 | -3.061284147424395 | -1.233931171633806 |
| N  | 3.001671133241158  | -3.469508241782400 | 1.410275208361862  |
| H  | -1.329333751612033 | -5.990850089229090 | -0.815700692698417 |
| H  | -1.086077568106059 | -5.326582053903820 | -2.308740477672270 |
| H  | -3.063969943411834 | -3.981928309687717 | -1.492647201430366 |
| H  | -3.979522611610843 | -2.643587849123364 | -1.992282167396205 |
| H  | -5.244674746681152 | 1.462658590582616  | 2.187534471955672  |
| H  | -6.025034084444691 | 1.230341517904616  | 0.743187437265906  |
| H  | -1.224702937382588 | 5.728664345528944  | 0.843492425318074  |
| H  | 1.314408051508752  | 5.244819755498888  | -2.375214150198708 |
| H  | 1.482049703300126  | 5.936669415577746  | -0.883228016390838 |
| H  | 3.188554861487854  | 3.884939649505992  | -1.506231821904812 |
| H  | 4.088476156593222  | 2.522034538797252  | -1.962653934120478 |
| H  | 5.129344477612934  | 2.280365805626964  | 0.008830288084916  |
| H  | 5.927753151898361  | 1.202534366804198  | 1.049725854218414  |
| H  | 5.940790664703504  | -1.365790370813393 | 1.111318818364822  |
| H  | 5.216763254628122  | -1.107649312106233 | 2.574018306160610  |
| H  | 3.912496947351472  | -3.092887392160677 | 1.699574763427910  |
| H  | 2.558397628000474  | -3.994829640337656 | 2.166062998559662  |
| H  | 2.335149574310138  | -5.103868316322668 | 0.211564385513582  |
| H  | 1.273765636235420  | -5.940027004586039 | -0.814525256636450 |
| H  | -5.094037176996265 | -2.327174433303835 | -0.088774948206314 |
| H  | -5.920774261886146 | -1.218334479685105 | 0.875900240691600  |
| H  | -4.047297330457143 | 3.189631180984778  | 1.067163895183562  |
| H  | -2.890204969520966 | 4.384998026429488  | 0.649522865209470  |
| H  | -0.886748701114787 | 6.073700562069124  | -0.737526258036031 |

Transition Metal: Ni; Functional Group: NH2; Adsorbate: O

|    |                    |                    |                    |
|----|--------------------|--------------------|--------------------|
| Ni | 0.004217572506634  | -0.004166767102284 | 0.557937756144358  |
| C  | 0.799447334567294  | 4.107654152867654  | -0.683660651232252 |
| C  | 1.186136868417194  | 2.729820041500748  | -0.468244886324239 |
| C  | 2.521186239955708  | 2.227325177699366  | -0.506718467022658 |
| C  | -0.692141034251602 | -4.135500223373377 | -0.649002213527858 |
| C  | -1.136478634197587 | -2.786707559872767 | -0.363754564915425 |
| C  | -2.468171497561944 | -2.304392208379685 | -0.450809826332868 |
| C  | 0.633381600723530  | -4.220015284198306 | -0.243170032768933 |
| C  | 1.000065584456240  | -2.900692744678118 | 0.239354615822408  |
| C  | -0.524562856357775 | 4.221164804483422  | -0.277710664107190 |
| C  | 2.307083127274308  | -2.519994291361300 | 0.653290926237190  |
| C  | -4.177955701059496 | 0.768245897136072  | 0.525103032798604  |
| C  | -0.972108320463690 | 2.891094610336814  | 0.071063430080132  |
| C  | -2.801746460138411 | 1.183819024250674  | 0.358009104729978  |
| C  | -4.226304485637367 | -0.590906051119763 | 0.241778658594258  |
| C  | -2.871429416434250 | -0.991092814552566 | -0.080769415570618 |
| C  | -2.323733689969604 | 2.525246828210196  | 0.360507410313682  |
| C  | 4.233524698132150  | 0.568315769201392  | 0.396866499366196  |
| C  | 2.903464142023988  | 0.934559502348652  | -0.065526696586982 |
| C  | 4.154910226596115  | -0.754866935835437 | 0.813377801049408  |
| C  | 2.800703782926902  | -1.194261668782222 | 0.557882817968594  |
| N  | 0.087696199787018  | 2.009871152399626  | -0.032435205712666 |
| N  | -0.078945495564881 | -2.049300723295964 | 0.138447846916576  |
| N  | -2.021366559033709 | 0.092527707647582  | 0.026479054360636  |
| N  | 2.051254970207048  | -0.145920480697772 | 0.051978609293086  |
| N  | 5.222431906407840  | -1.550086518041649 | 1.370553785262408  |
| N  | -5.297852152141536 | 1.608197763958592  | 0.843374979729324  |
| N  | -5.389440175512654 | -1.387828407388749 | 0.264071752437600  |
| N  | -1.304407931318124 | 5.414706043654988  | -0.286236569903892 |
| N  | 1.643567728346826  | 5.173168708432208  | -1.170229831857487 |
| N  | 5.387531470164609  | 1.364964751301700  | 0.421281446127856  |
| N  | -1.480359110747539 | -5.196136886442789 | -1.230715774850179 |
| N  | 1.440135922735052  | -5.366005861828018 | -0.308777047151562 |
| N  | -3.242908599728693 | 3.542948769431076  | 0.598650786031240  |
| N  | 3.560484306791824  | 3.111536296431038  | -0.856798343098632 |
| N  | -3.481675738175976 | -3.205301108334183 | -0.822988256742907 |
| N  | 3.194664114971246  | -3.550959035454014 | 1.018667112494376  |
| H  | -1.375490620668401 | -6.068981982898043 | -0.703662707062808 |
| H  | -1.206741523078836 | -5.390014078203579 | -2.200519084743256 |
| H  | -3.111604766389750 | -4.115649631429006 | -1.125043766995219 |
| H  | -4.172660461732944 | -2.818233889471362 | -1.465117755183698 |
| H  | -5.427275590898512 | 1.734263742108542  | 1.852922974384218  |
| H  | -6.168431625856046 | 1.238291642494790  | 0.453820042171240  |
| H  | -1.517581541900434 | 5.741393312842936  | 0.662133071123964  |
| H  | 1.393223937591120  | 5.455284457529982  | -2.123363619190275 |
| H  | 1.588904004849112  | 6.006544541404768  | -0.575861209751778 |
| H  | 3.217687087051184  | 4.031607079054882  | -1.157152151503716 |
| H  | 4.254776589909122  | 2.711980614864682  | -1.487410942974655 |
| H  | 5.181060421959648  | 2.366061500574916  | 0.439867252197590  |
| H  | 6.040635031831406  | 1.098676048731738  | 1.159749936386724  |
| H  | 6.092567108926332  | -1.436644268764425 | 0.841037522255270  |
| H  | 5.419890338687614  | -1.297239548657750 | 2.345233916930916  |
| H  | 4.113330979912206  | -3.191910443237372 | 1.307042772183620  |
| H  | 2.803462438742910  | -4.219929962286798 | 1.681766980715912  |
| H  | 2.439333156518344  | -5.149764038050897 | -0.285159358425183 |
| H  | 1.202120277318680  | -5.980733133033475 | -1.088548064585940 |
| H  | -5.174382959056524 | -2.381077065865110 | 0.377676403961162  |
| H  | -6.049373655734176 | -1.084262584988448 | 0.983854612204630  |
| H  | -4.220574894572382 | 3.239345212487264  | 0.5288871666063460 |
| H  | -3.031485454853811 | 4.421526370799308  | 0.122278809018270  |
| H  | -0.812431588763296 | 6.169422690695287  | -0.772080494176485 |
| O  | 0.021001512390084  | -0.001460701692121 | 2.302195312055038  |

## Transition Metal: Ni; Functional Group: NH2; Adsorbate: OH

|    |                    |                    |                    |
|----|--------------------|--------------------|--------------------|
| Ni | 0.022710526986086  | -0.007004870164760 | 0.296300900233826  |
| C  | 0.786172806061848  | 4.007149436622278  | -0.962288511342038 |
| C  | 1.209779507422416  | 2.721207390154520  | -0.461202833944501 |
| C  | 2.542483216833910  | 2.290026625584592  | -0.222672187613501 |
| C  | -0.696586411359458 | -4.000478402299873 | -1.057782768495244 |
| C  | -1.140013222564509 | -2.711776383611273 | -0.568810920111041 |
| C  | -2.477219829190719 | -2.254997034338018 | -0.452195836233539 |
| C  | 0.652279655331540  | -4.102608591052556 | -0.742778008466971 |
| C  | 1.015776073001224  | -2.857930186118104 | -0.091231173780462 |
| C  | -0.568818910683916 | 4.122281040439556  | -0.668080741321120 |
| C  | 2.295969809301512  | -2.530143120050635 | 0.427795421687044  |
| C  | -4.029122009940094 | 0.748735447357840  | 0.917977782325828  |
| C  | -0.964932453118170 | 2.871654063789366  | -0.065235500777190 |
| C  | -2.707596608349053 | 1.187673227174176  | 0.536923944387018  |
| C  | -4.105010717974103 | -0.604608824119641 | 0.613957589823006  |
| C  | -2.818648119674126 | -0.976335074401334 | 0.065577062591742  |
| C  | -2.269897619577620 | 2.532581025897610  | 0.421478267525578  |
| C  | 4.099497339388686  | 0.602398181084684  | 0.892858927317818  |
| C  | 2.859017719944232  | 0.995351260628990  | 0.256290025257814  |
| C  | 4.014499925785108  | -0.764621348141588 | 1.117266128447234  |
| C  | 2.733166226518606  | -1.193709614649887 | 0.605005106580286  |
| N  | 0.109200555503324  | 2.021477510549794  | 0.016433160576100  |
| N  | -0.074449668659504 | -2.017608947316550 | -0.030589432668084 |
| N  | -1.965802926259126 | 0.115732735900334  | 0.062598122708168  |
| N  | 2.020057740642140  | -0.106119844388136 | 0.126220561878536  |
| N  | 5.011661378656246  | -1.609496769337490 | 1.723894275743552  |
| N  | -5.084843267779931 | 1.578685283712210  | 1.419704214913718  |
| N  | -5.238150138434669 | -1.428869207630854 | 0.796492327607560  |
| N  | -1.438434425523297 | 5.245621623253732  | -0.914446616452970 |
| N  | 1.617349567095626  | 4.980781199087542  | -1.597137505949981 |
| N  | 5.201438911999120  | 1.422904527690990  | 1.204921227285640  |
| N  | -1.517008476304081 | -4.993206988220642 | -1.707622717998579 |
| N  | 1.482268898918140  | -5.209267692482255 | -0.998272103565370 |
| N  | -3.126076571428513 | 3.559358035059140  | 0.750442044500484  |
| N  | 3.581885356843636  | 3.223126554118580  | -0.337440314507226 |
| N  | -3.516102394923017 | -3.141359758535565 | -0.759991236039525 |
| N  | 3.200923635155930  | -3.576354415846769 | 0.655822494030648  |
| H  | -1.309010357618028 | -5.933980786525087 | -1.359333252979905 |
| H  | -1.380009565586271 | -5.004725956463812 | -2.724391725644054 |
| H  | -3.188165366204526 | -4.006483891356179 | -1.205711388636644 |
| H  | -4.324745489783313 | -2.720454186108302 | -1.215082029339804 |
| H  | -5.004729157248459 | 1.756053668435226  | 2.426489154649090  |
| H  | -6.004151813594010 | 1.168566710458442  | 1.239885749387334  |
| H  | -0.988991932247330 | 6.137917226092732  | -0.694721615557498 |
| H  | 2.004086481964892  | 4.624388648745950  | -2.477171524760621 |
| H  | 1.082406415163620  | 5.823649344587212  | -1.823712725476582 |
| H  | 3.304228156732196  | 4.140385383725142  | -0.688124942214245 |
| H  | 4.457394105484062  | 2.874863697383734  | -0.722917282622092 |
| H  | 4.935962092637237  | 2.394832450221038  | 1.373483425183230  |
| H  | 5.740774769526120  | 1.060458785329296  | 1.993617713053312  |
| H  | 5.958872297125684  | -1.343998387066897 | 1.440177528820280  |
| H  | 4.970967929710788  | -1.580499890783436 | 2.748551572128152  |
| H  | 4.069487041901882  | -3.259617812810099 | 1.103742952380096  |
| H  | 2.794513506903380  | -4.399734539218429 | 1.099501400756596  |
| H  | 2.475018135350858  | -4.967501173098645 | -1.016362959898316 |
| H  | 1.213924954284102  | -5.719910496297814 | -1.841260213150669 |
| H  | -4.989377637638469 | -2.419437603142018 | 0.843787014692680  |
| H  | -5.767150333120441 | -1.168286539647937 | 1.632121104598520  |
| H  | -4.114679735190354 | 3.313873813489202  | 0.835669039214246  |
| H  | -2.878028303733192 | 4.476220788970878  | 0.373083076966662  |
| H  | -1.762710812994463 | 5.286596353943802  | -1.886335758347890 |
| H  | 0.121491541099660  | 0.885364829108966  | 2.554108683925000  |
| O  | 0.005456138309154  | -0.043943075913218 | 2.278682458718232  |



Transition Metal: Ni; Functional Group: NH2; Adsorbate: OOH

|    |                    |                    |                    |
|----|--------------------|--------------------|--------------------|
| Ni | 0.023340352161876  | -0.005330973796596 | 0.243460047429888  |
| C  | 0.778579488257236  | 3.983228671449266  | -0.979151374535594 |
| C  | 1.205965256157096  | 2.698272223188300  | -0.478625880819017 |
| C  | 2.540374469902992  | 2.280472398775924  | -0.242182751463996 |
| C  | -0.698781699801192 | -3.977160885059412 | -1.059357042901748 |
| C  | -1.144546042477216 | -2.690887647756213 | -0.568209456455385 |
| C  | -2.480760941737412 | -2.242992775722353 | -0.454700446791968 |
| C  | 0.645338550695088  | -4.085071777316426 | -0.732756184627704 |
| C  | 1.009161784417592  | -2.845283041090742 | -0.073134716215357 |
| C  | -0.570396559586342 | 4.103285143154670  | -0.668012207140581 |
| C  | 2.288688372654046  | -2.529098623661817 | 0.443121660483734  |
| C  | -4.018206541779749 | 0.750677455404958  | 0.941824748278830  |
| C  | -0.963574744673373 | 2.857250298564150  | -0.054549916981735 |
| C  | -2.694881349499092 | 1.190042047644234  | 0.566834241232188  |
| C  | -4.099140436167959 | -0.597751086239995 | 0.620628214586870  |
| C  | -2.815460663172470 | -0.968849030540969 | 0.069100048571340  |
| C  | -2.260372195291612 | 2.533613331334222  | 0.449277234186930  |
| C  | 4.094093531490482  | 0.601534401472322  | 0.880969986587268  |
| C  | 2.855703456575360  | 0.990719554394124  | 0.239338472751654  |
| C  | 4.004704601122206  | -0.762007492124301 | 1.120903900692496  |
| C  | 2.723904365628464  | -1.193713555917689 | 0.612389504438154  |
| N  | 0.109310137433678  | 2.000064068116872  | 0.015346263622164  |
| N  | -0.080464861309700 | -1.998799259094444 | -0.015160176444894 |
| N  | -1.955290963998920 | 0.118607220524648  | 0.080921653210530  |
| N  | 2.013101681489538  | -0.109565470686000 | 0.119072048142218  |
| N  | 4.998385746638868  | -1.603642219270569 | 1.735244964400474  |
| N  | -5.081139966787307 | 1.578868421981564  | 1.429035114660134  |
| N  | -5.234888820600780 | -1.418395147380117 | 0.792215602892984  |
| N  | -1.441623817407020 | 5.225007098958710  | -0.914033073974128 |
| N  | 1.601964711222802  | 4.955482415052646  | -1.623531477016908 |
| N  | 5.194022938670292  | 1.423812513514112  | 1.190861442521122  |
| N  | -1.516240596985753 | -4.970186648213890 | -1.710260442219688 |
| N  | 1.473862549957790  | -5.191547431783544 | -0.990090956633196 |
| N  | -3.113696914256476 | 3.565235787015252  | 0.789406253932080  |
| N  | 3.579092000510210  | 3.219561370175268  | -0.353339121802051 |
| N  | -3.526111549374015 | -3.128197035639289 | -0.764442908841684 |
| N  | 3.193722961405834  | -3.581516329038873 | 0.665321788450296  |
| H  | -1.282359774312816 | -5.912795569889489 | -1.384269378002248 |
| H  | -1.403772751021897 | -4.959899695745060 | -2.729909896154382 |
| H  | -3.191561537733179 | -3.996838737440513 | -1.198074420128084 |
| H  | -4.308300946575461 | -2.704268861440035 | -1.262727275023018 |
| H  | -5.013600324525394 | 1.770497780553928  | 2.433769069476310  |
| H  | -5.995316606154033 | 1.159581898948358  | 1.244116078718670  |
| H  | -0.996930084043850 | 6.117939015693126  | -0.687735560581679 |
| H  | 2.001627423128414  | 4.592598734299612  | -2.494697388247996 |
| H  | 1.058279810683960  | 5.788877405134400  | -1.863563022495864 |
| H  | 3.290076480783446  | 4.137233689670774  | -0.693595109230081 |
| H  | 4.440599773102966  | 2.879440933463382  | -0.777305069111755 |
| H  | 4.929635271880700  | 2.402158438962380  | 1.321488362903522  |
| H  | 5.713377607455122  | 1.082332484843322  | 2.001888902124166  |
| H  | 5.946883400663482  | -1.319689418513313 | 1.475322436203538  |
| H  | 4.935811505791016  | -1.592579411758472 | 2.759164729311874  |
| H  | 4.067917863378754  | -3.260410860492264 | 1.098365753023882  |
| H  | 2.789416192573916  | -4.385833323374193 | 1.145279830457498  |
| H  | 2.468379721424920  | -4.955636165920559 | -0.974694118542594 |
| H  | 1.223848537302450  | -5.681642965560371 | -1.850639606327512 |
| H  | -4.992177216985992 | -2.411796278498418 | 0.795017650177174  |
| H  | -5.749345701536981 | -1.184574613179205 | 1.644426256558054  |
| H  | -4.104439154711477 | 3.319137294540108  | 0.846320718347820  |
| H  | -2.869455091573311 | 4.472677280464650  | 0.385921195706086  |
| H  | -1.760208645196006 | 5.268333817580694  | -1.887532362475920 |
| H  | -1.279170597743612 | 0.629357938346084  | 3.260926458126172  |
| O  | 0.250595054682634  | -0.012492256731048 | 2.332678743230254  |
| O  | -0.918511087762891 | -0.274572428368739 | 3.128163804501882  |

Transition Metal: Ni; Functional Group: OH; Adsorbate: Clean

|    |                    |                    |                   |
|----|--------------------|--------------------|-------------------|
| Ni | 11.000420000000000 | 11.014150000000001 | 7.875650000000000 |
| C  | 10.353289999999999 | 15.167479999999999 | 7.514540000000000 |
| C  | 9.946149999999999  | 13.792550000000000 | 7.492700000000000 |
| C  | 8.633450000000000  | 13.357570000000001 | 7.289000000000000 |
| C  | 11.630170000000000 | 6.861800000000000  | 7.501310000000000 |
| C  | 12.051780000000001 | 8.233620000000000  | 7.512290000000000 |
| C  | 13.377140000000001 | 8.657000000000000  | 7.379940000000000 |
| C  | 10.328270000000000 | 6.817570000000000  | 7.945840000000000 |
| C  | 9.921490000000000  | 8.191750000000001  | 8.136110000000000 |
| C  | 11.667880000000000 | 15.212199999999999 | 7.920090000000000 |
| C  | 8.613530000000001  | 8.618370000000001  | 8.412400000000000 |
| C  | 15.154430000000000 | 11.644230000000000 | 8.271430000000001 |
| C  | 12.073969999999999 | 13.839919999999999 | 8.121090000000001 |
| C  | 13.783770000000001 | 12.085110000000000 | 8.253270000000001 |
| C  | 15.175620000000000 | 10.333510000000000 | 7.865100000000000 |
| C  | 13.798159999999999 | 9.956200000000001  | 7.656800000000000 |
| C  | 13.378399999999999 | 13.416150000000000 | 8.419710000000000 |
| C  | 6.824730000000000  | 11.678739999999999 | 7.729160000000000 |
| C  | 8.207030000000000  | 12.059880000000000 | 7.567120000000000 |
| C  | 6.837590000000000  | 10.380580000000000 | 8.175810000000000 |
| C  | 8.210080000000000  | 9.946940000000000  | 8.217650000000001 |
| N  | 11.008620000000001 | 12.977660000000000 | 7.858360000000000 |
| N  | 10.990010000000000 | 9.051250000000000  | 7.874390000000000 |
| N  | 12.948930000000001 | 11.030469999999999 | 7.890580000000000 |
| N  | 9.052170000000000  | 10.997150000000000 | 7.860900000000000 |
| O  | 9.532170000000001  | 16.261060000000001 | 7.176060000000000 |
| O  | 7.647060000000000  | 14.258770000000000 | 6.901980000000000 |
| O  | 12.453090000000000 | 5.747240000000000  | 7.231970000000000 |
| O  | 14.379730000000000 | 7.738060000000000  | 7.076360000000000 |
| O  | 9.546189999999999  | 5.710280000000000  | 8.135050000000000 |
| O  | 12.456640000000000 | 16.322179999999999 | 8.086710000000000 |
| O  | 7.711750000000000  | 7.654350000000000  | 8.782660000000000 |
| O  | 16.222030000000000 | 12.461620000000000 | 8.609170000000001 |
| O  | 16.310770000000002 | 9.573119999999999  | 7.737590000000000 |
| O  | 14.272620000000000 | 14.384800000000000 | 8.797090000000001 |
| O  | 5.691000000000000  | 12.429560000000000 | 7.541590000000000 |
| O  | 5.763270000000000  | 9.566879999999999  | 8.501700000000000 |
| H  | 9.379420000000000  | 16.798760000000001 | 7.977780000000000 |
| H  | 8.053280000000001  | 15.154590000000001 | 6.853730000000000 |
| H  | 12.292949999999999 | 5.455810000000000  | 6.313140000000000 |
| H  | 13.992279999999999 | 6.834750000000000  | 7.137720000000000 |
| H  | 10.122240000000000 | 4.929150000000000  | 8.020910000000001 |
| H  | 12.016019999999999 | 17.065550000000002 | 7.631100000000000 |
| H  | 6.814240000000000  | 8.048470000000000  | 8.803780000000000 |
| H  | 17.052389999999999 | 11.981140000000000 | 8.434350000000000 |
| H  | 16.021339999999999 | 8.676090000000000  | 7.464320000000000 |
| H  | 15.169370000000001 | 13.990930000000001 | 8.842250000000000 |
| H  | 5.981760000000000  | 13.313520000000000 | 7.231650000000000 |
| H  | 4.937300000000000  | 10.026430000000000 | 8.261939999999999 |

Transition Metal: Ni; Functional Group: OH; Adsorbate: O

|    |                    |                    |                   |
|----|--------------------|--------------------|-------------------|
| Ni | 10.994510000000000 | 11.013170000000001 | 7.675210000000000 |
| C  | 10.326359999999999 | 15.250209999999999 | 6.967050000000000 |
| C  | 9.919029999999999  | 13.872900000000000 | 6.991930000000000 |
| C  | 8.588360000000000  | 13.423150000000000 | 6.896270000000000 |
| C  | 11.661239999999999 | 6.780240000000000  | 6.928830000000000 |
| C  | 12.075670000000001 | 8.154190000000000  | 7.000760000000000 |
| C  | 13.411619999999999 | 8.596410000000001  | 6.970010000000000 |
| C  | 10.298710000000000 | 6.736450000000000  | 7.139860000000000 |
| C  | 9.872460000000000  | 8.113560000000000  | 7.281170000000000 |
| C  | 11.695750000000000 | 15.290210000000000 | 7.130140000000000 |
| C  | 8.538489999999999  | 8.557930000000001  | 7.428420000000000 |
| C  | 15.239020000000000 | 11.680490000000001 | 7.374070000000000 |
| C  | 12.122180000000000 | 13.912929999999999 | 7.266280000000000 |
| C  | 13.867270000000000 | 12.121340000000000 | 7.356570000000000 |
| C  | 15.241360000000000 | 10.315700000000000 | 7.197030000000000 |
| C  | 13.854290000000001 | 9.921690000000000  | 7.101980000000000 |
| C  | 13.454920000000000 | 13.469910000000000 | 7.426690000000000 |
| C  | 6.755960000000000  | 11.701440000000000 | 7.078680000000000 |
| C  | 8.144880000000001  | 12.098360000000000 | 7.029400000000000 |
| C  | 6.754540000000000  | 10.342770000000000 | 7.295900000000000 |
| C  | 8.127020000000000  | 9.905650000000000  | 7.335700000000000 |
| N  | 11.027550000000000 | 13.067280000000000 | 7.163280000000000 |
| N  | 10.968550000000000 | 8.958920000000001  | 7.185650000000000 |
| N  | 13.028210000000000 | 11.030080000000000 | 7.186020000000000 |
| N  | 8.969220000000000  | 10.994680000000001 | 7.170980000000000 |
| O  | 10.977969999999999 | 11.013719999999999 | 9.411410000000000 |
| O  | 9.477900000000000  | 16.354859999999999 | 6.745170000000000 |
| O  | 7.580150000000000  | 14.357110000000000 | 6.693960000000000 |
| O  | 12.508240000000001 | 5.665140000000000  | 6.751660000000000 |
| O  | 14.424630000000001 | 7.653170000000000  | 6.843530000000000 |
| O  | 9.499680000000000  | 5.626060000000000  | 7.172450000000000 |
| O  | 12.499050000000000 | 16.399719999999999 | 7.137900000000000 |
| O  | 7.606210000000000  | 7.573600000000000  | 7.614650000000000 |
| O  | 16.327200000000001 | 12.525639999999999 | 7.512160000000000 |
| O  | 16.379439999999999 | 9.553210000000000  | 7.127900000000000 |
| O  | 14.383360000000000 | 14.456070000000000 | 7.622430000000000 |
| O  | 5.619220000000000  | 12.457750000000001 | 6.946880000000000 |
| O  | 5.664130000000000  | 9.498550000000000  | 7.422820000000000 |
| H  | 9.420210000000001  | 16.877220000000001 | 7.569120000000000 |
| H  | 7.992180000000000  | 15.248810000000001 | 6.611650000000000 |
| H  | 12.430120000000001 | 5.356150000000000  | 5.827590000000000 |
| H  | 14.018000000000001 | 6.755320000000000  | 6.848860000000000 |
| H  | 10.087640000000000 | 4.845320000000000  | 7.162990000000000 |
| H  | 11.972980000000000 | 17.145849999999999 | 6.789320000000000 |
| H  | 6.709310000000000  | 7.971200000000000  | 7.618940000000000 |
| H  | 17.145980000000002 | 12.000980000000000 | 7.437750000000000 |
| H  | 16.092500000000001 | 8.622430000000000  | 7.016290000000000 |
| H  | 15.279540000000001 | 14.058320000000000 | 7.652580000000000 |
| H  | 5.907620000000000  | 13.382860000000001 | 6.798630000000000 |
| H  | 4.847770000000000  | 10.011590000000000 | 7.275390000000000 |

Transition Metal: Ni; Functional Group: OH; Adsorbate: OH

|    |                    |                    |                   |
|----|--------------------|--------------------|-------------------|
| Ni | 10.995799999999999 | 11.013820000000001 | 7.307680000000000 |
| C  | 10.316260000000000 | 15.262449999999999 | 6.730150000000000 |
| C  | 9.912390000000000  | 13.886130000000000 | 6.830650000000000 |
| C  | 8.582760000000000  | 13.423170000000001 | 6.829340000000000 |
| C  | 11.674810000000001 | 6.759600000000000  | 6.687620000000000 |
| C  | 12.082570000000000 | 8.128100000000000  | 6.850780000000000 |
| C  | 13.413740000000001 | 8.585070000000000  | 6.906860000000000 |
| C  | 10.303640000000000 | 6.711770000000000  | 6.839830000000000 |
| C  | 9.881600000000001  | 8.082420000000001  | 7.048370000000000 |
| C  | 11.690379999999999 | 15.301990000000000 | 6.844710000000000 |
| C  | 8.554040000000001  | 8.537610000000001  | 7.228040000000000 |
| C  | 15.187560000000000 | 11.673069999999999 | 7.460890000000000 |
| C  | 12.108940000000000 | 13.926850000000000 | 7.038760000000000 |
| C  | 13.826919999999999 | 12.116809999999999 | 7.288500000000000 |
| C  | 15.204020000000000 | 10.307150000000000 | 7.314850000000000 |
| C  | 13.833030000000001 | 9.912620000000000  | 7.082990000000000 |
| C  | 13.430650000000000 | 13.473290000000000 | 7.260530000000000 |
| C  | 6.779780000000000  | 11.700979999999999 | 7.174800000000000 |
| C  | 8.160050000000000  | 12.094820000000000 | 7.001770000000000 |
| C  | 6.791000000000000  | 10.337690000000000 | 7.343350000000000 |
| C  | 8.158180000000000  | 9.894310000000001  | 7.236400000000000 |
| N  | 11.015630000000000 | 13.084360000000000 | 7.008600000000000 |
| N  | 10.978000000000000 | 8.926940000000000  | 7.049660000000000 |
| N  | 12.999459999999999 | 11.026020000000001 | 7.051970000000000 |
| N  | 8.994640000000000  | 10.984740000000000 | 7.023900000000000 |
| O  | 10.992640000000000 | 11.081460000000000 | 9.226630000000000 |
| O  | 9.450620000000001  | 16.355100000000000 | 6.512680000000000 |
| O  | 7.561510000000000  | 14.347799999999999 | 6.684470000000000 |
| O  | 12.531650000000001 | 5.652160000000000  | 6.505880000000000 |
| O  | 14.435969999999999 | 7.650800000000000  | 6.826230000000000 |
| O  | 9.496309999999999  | 5.607440000000000  | 6.788440000000000 |
| O  | 12.505710000000001 | 16.403120000000001 | 6.786300000000000 |
| O  | 7.614290000000000  | 7.557900000000000  | 7.366890000000000 |
| O  | 16.260210000000001 | 12.518760000000000 | 7.696160000000000 |
| O  | 16.342630000000000 | 9.543780000000000  | 7.387310000000000 |
| O  | 14.362640000000001 | 14.453659999999999 | 7.435930000000000 |
| O  | 5.638500000000000  | 12.462619999999999 | 7.181030000000000 |
| O  | 5.709950000000000  | 9.493010000000000  | 7.545590000000000 |
| H  | 11.036500000000000 | 10.155239999999999 | 9.532780000000001 |
| H  | 9.466030000000000  | 16.927949999999999 | 7.304520000000000 |
| H  | 7.963540000000000  | 15.241450000000000 | 6.567520000000000 |
| H  | 12.523190000000000 | 5.398310000000000  | 5.562100000000000 |
| H  | 14.034120000000000 | 6.751220000000000  | 6.784060000000000 |
| H  | 10.077790000000000 | 4.822320000000000  | 6.759380000000000 |
| H  | 11.980729999999999 | 17.140370000000001 | 6.418030000000000 |
| H  | 6.723260000000000  | 7.965680000000000  | 7.438210000000000 |
| H  | 17.084620000000001 | 11.997800000000000 | 7.675930000000000 |
| H  | 16.076280000000001 | 8.614590000000000  | 7.227270000000000 |
| H  | 15.250310000000001 | 14.047820000000000 | 7.546600000000000 |
| H  | 5.909720000000000  | 13.387480000000000 | 7.004850000000000 |
| H  | 4.885920000000000  | 10.007920000000000 | 7.459360000000000 |

Transition Metal: Ni; Functional Group: OH; Adsorbate: OOH

|    |                    |                    |                   |
|----|--------------------|--------------------|-------------------|
| Ni | 10.982519999999999 | 11.037910000000000 | 6.687350000000000 |
| C  | 10.320280000000000 | 15.310370000000001 | 6.199690000000000 |
| C  | 9.913750000000000  | 13.931699999999999 | 6.246860000000000 |
| C  | 8.580660000000000  | 13.476010000000000 | 6.215210000000000 |
| C  | 11.649649999999999 | 6.777910000000000  | 6.188510000000000 |
| C  | 12.059220000000000 | 8.154120000000001  | 6.271680000000000 |
| C  | 13.394090000000000 | 8.603970000000000  | 6.305360000000000 |
| C  | 10.278190000000000 | 6.741270000000000  | 6.328380000000000 |
| C  | 9.857440000000000  | 8.124129999999999  | 6.448660000000000 |
| C  | 11.695810000000000 | 15.343299999999999 | 6.293770000000000 |
| C  | 8.527100000000001  | 8.585910000000000  | 6.588940000000000 |
| C  | 15.210419999999999 | 11.695660000000000 | 6.675800000000000 |
| C  | 12.115340000000000 | 13.960360000000000 | 6.419980000000000 |
| C  | 13.842440000000000 | 12.140300000000000 | 6.570550000000000 |
| C  | 15.213329999999999 | 10.326000000000001 | 6.571300000000000 |
| C  | 13.829760000000000 | 9.933880000000000  | 6.419120000000000 |
| C  | 13.444940000000001 | 13.497900000000000 | 6.572000000000000 |
| C  | 6.755150000000000  | 11.754600000000000 | 6.452450000000000 |
| C  | 8.142799999999999  | 12.147349999999999 | 6.346030000000000 |
| C  | 6.756000000000000  | 10.388870000000001 | 6.609760000000000 |
| C  | 8.126899999999999  | 9.943709999999999  | 6.566110000000000 |
| H  | 9.452230000000000  | 16.935659999999999 | 6.861330000000000 |
| H  | 7.976360000000000  | 15.305149999999999 | 5.987780000000000 |
| H  | 12.477160000000000 | 5.333040000000000  | 5.156340000000000 |
| H  | 14.000560000000000 | 6.761400000000000  | 6.260280000000000 |
| H  | 10.054040000000001 | 4.851800000000000  | 6.397990000000000 |
| H  | 11.971590000000001 | 17.202590000000001 | 5.963270000000000 |
| H  | 6.687920000000000  | 8.020360000000000  | 6.747840000000000 |
| H  | 17.115790000000001 | 12.009270000000001 | 6.821110000000000 |
| H  | 16.069230000000001 | 8.625190000000000  | 6.514440000000000 |
| H  | 15.278470000000000 | 14.066860000000000 | 6.778590000000000 |
| H  | 5.897670000000000  | 13.445440000000000 | 6.262880000000000 |
| H  | 4.846570000000000  | 10.062840000000000 | 6.631320000000000 |
| H  | 9.466790000000000  | 10.577550000000000 | 9.455850000000000 |
| O  | 9.459270000000000  | 16.416509999999999 | 6.033260000000000 |
| O  | 7.566380000000000  | 14.411540000000000 | 6.073410000000000 |
| O  | 12.505530000000000 | 5.660350000000000  | 6.076770000000000 |
| O  | 14.408440000000001 | 7.659600000000000  | 6.259770000000000 |
| O  | 9.471710000000000  | 5.634560000000000  | 6.339280000000000 |
| O  | 12.509340000000000 | 16.446100000000001 | 6.268780000000000 |
| O  | 7.579920000000000  | 7.610330000000000  | 6.712870000000000 |
| O  | 16.298649999999999 | 12.541729999999999 | 6.826240000000000 |
| O  | 16.350899999999999 | 9.558870000000001  | 6.608920000000000 |
| O  | 14.387779999999999 | 14.475330000000000 | 6.710390000000000 |
| O  | 5.615700000000000  | 12.519520000000000 | 6.416400000000000 |
| O  | 5.664020000000000  | 9.545460000000000  | 6.756220000000000 |
| O  | 11.044800000000000 | 11.218460000000000 | 8.612570000000000 |
| O  | 10.359180000000000 | 10.183890000000000 | 9.332920000000000 |
| N  | 11.018710000000000 | 13.120820000000000 | 6.374780000000000 |
| N  | 10.954620000000000 | 8.964230000000001  | 6.406150000000000 |
| N  | 13.001340000000001 | 11.048069999999999 | 6.404030000000000 |
| N  | 8.971780000000001  | 11.033569999999999 | 6.403350000000000 |

## **Systems with explicit solvation**

Transition Metal: Co; Functional Group: F; Adsorbate: OH

|    |                    |                    |                    |
|----|--------------------|--------------------|--------------------|
| C  | 9.111700000000001  | 15.228149999999999 | 8.170290000000000  |
| C  | 9.001260000000000  | 13.855390000000000 | 8.593880000000000  |
| C  | 8.919720000000000  | 13.429670000000000 | 9.914690000000000  |
| C  | 8.974750000000000  | 6.769770000000000  | 6.827010000000000  |
| C  | 8.917130000000000  | 8.147420000000000  | 6.405760000000000  |
| C  | 8.840249999999999  | 8.573740000000001  | 5.085590000000000  |
| C  | 9.001170000000000  | 6.774110000000000  | 8.193149999999999  |
| C  | 8.959600000000000  | 8.154299999999999  | 8.607870000000000  |
| C  | 9.114640000000000  | 15.224700000000000 | 6.803140000000000  |
| C  | 8.916040000000001  | 8.589110000000000  | 9.927060000000001  |
| C  | 8.697329999999999  | 11.675870000000000 | 3.274640000000000  |
| C  | 9.007770000000001  | 13.849589999999999 | 6.387270000000000  |
| C  | 8.814930000000000  | 12.097650000000000 | 4.648210000000000  |
| C  | 8.676010000000000  | 10.310010000000000 | 3.279880000000000  |
| C  | 8.777180000000000  | 9.894230000000000  | 4.657170000000000  |
| C  | 8.930440000000001  | 13.416700000000001 | 5.068710000000000  |
| C  | 8.705060000000000  | 11.696709999999999 | 11.720430000000000 |
| C  | 8.811180000000000  | 12.112909999999999 | 10.343740000000000 |
| C  | 8.711119999999999  | 10.330850000000000 | 11.723390000000000 |
| C  | 8.818830000000000  | 9.909640000000000  | 10.348610000000001 |
| Co | 9.062820000000000  | 11.004830000000000 | 7.498900000000000  |
| F  | 8.599550000000001  | 12.472950000000001 | 2.197260000000000  |
| F  | 8.559229999999999  | 9.510680000000001  | 2.207130000000000  |
| F  | 9.177780000000000  | 16.299820000000000 | 5.999380000000000  |
| F  | 9.176230000000000  | 16.308479999999999 | 8.967820000000000  |
| F  | 8.594300000000000  | 12.497130000000000 | 12.793650000000000 |
| F  | 8.970430000000000  | 5.689110000000000  | 6.030120000000000  |
| F  | 9.018950000000000  | 5.698560000000000  | 8.998460000000000  |
| F  | 8.963570000000001  | 14.371729999999999 | 4.102830000000000  |
| F  | 8.951870000000000  | 14.390779999999999 | 10.874910000000000 |
| F  | 8.814069999999999  | 7.613950000000000  | 4.127090000000000  |
| F  | 8.955500000000001  | 7.635790000000000  | 10.893720000000000 |
| F  | 8.602700000000000  | 9.533239999999999  | 12.798719999999999 |
| H  | 11.232889999999999 | 11.916670000000000 | 7.413300000000000  |
| H  | 13.049740000000000 | 14.146739999999999 | 8.467520000000000  |
| H  | 12.050310000000000 | 10.726210000000000 | 8.995320000000000  |
| H  | 13.424870000000000 | 10.235099999999999 | 9.539999999999999  |
| H  | 13.047710000000000 | 12.612230000000000 | 8.745990000000001  |
| H  | 11.980540000000000 | 9.843640000000001  | 6.419520000000000  |
| H  | 13.240500000000001 | 9.590970000000000  | 5.546960000000000  |
| O  | 10.935969999999999 | 10.984900000000000 | 7.506530000000000  |
| O  | 12.756309999999999 | 10.931880000000000 | 9.660580000000000  |
| O  | 12.504740000000000 | 9.129479999999999  | 5.984420000000000  |
| O  | 12.851680000000000 | 13.289260000000001 | 8.054819999999999  |
| N  | 8.934170000000000  | 13.004049999999999 | 7.492760000000000  |
| N  | 8.899319999999999  | 9.000579999999999  | 7.504620000000000  |
| N  | 8.824590000000001  | 10.998220000000000 | 5.503610000000000  |
| N  | 8.833830000000001  | 11.008860000000000 | 9.494940000000000  |

Transition Metal: Co; Functional Group: F; Adsorbate: OOH

|    |                    |                    |                    |
|----|--------------------|--------------------|--------------------|
| C  | 8.587320000000000  | 15.218970000000001 | 8.212199999999999  |
| C  | 8.592950000000000  | 13.836710000000000 | 8.623740000000000  |
| C  | 8.558800000000000  | 13.396750000000001 | 9.942040000000000  |
| C  | 8.735740000000000  | 6.755070000000000  | 6.810860000000000  |
| C  | 8.711040000000001  | 8.137810000000000  | 6.399390000000000  |
| C  | 8.746589999999999  | 8.576510000000001  | 5.080690000000000  |
| C  | 8.713469999999999  | 6.748340000000000  | 8.177080000000000  |
| C  | 8.666150000000000  | 8.126939999999999  | 8.601440000000000  |
| C  | 8.618679999999999  | 15.226000000000001 | 6.845400000000000  |
| C  | 8.626070000000000  | 8.552190000000000  | 9.924390000000001  |
| C  | 8.764210000000000  | 11.689240000000000 | 3.282010000000000  |
| C  | 8.654840000000000  | 13.848520000000001 | 6.419790000000000  |
| C  | 8.738490000000001  | 12.103990000000000 | 4.663330000000000  |
| C  | 8.764490000000000  | 10.323460000000001 | 3.277600000000000  |
| C  | 8.743280000000000  | 9.899990000000001  | 4.656640000000000  |
| C  | 8.719580000000001  | 13.423190000000000 | 5.098300000000000  |
| C  | 8.481750000000000  | 11.650589999999999 | 11.744420000000000 |
| C  | 8.525880000000001  | 12.074070000000001 | 10.366230000000000 |
| C  | 8.519890000000000  | 10.285140000000000 | 11.740449999999999 |
| C  | 8.571520000000000  | 9.871470000000000  | 10.358610000000001 |
| Co | 8.824290000000000  | 10.993790000000001 | 7.524950000000000  |
| F  | 8.764410000000000  | 12.491220000000000 | 2.203270000000000  |
| F  | 8.766140000000000  | 9.529050000000000  | 2.193800000000000  |
| F  | 8.597920000000000  | 16.310739999999999 | 6.048980000000000  |
| F  | 8.537530000000000  | 16.295339999999999 | 9.016670000000000  |
| F  | 8.399380000000001  | 12.446080000000000 | 12.825170000000000 |
| F  | 8.765919999999999  | 5.679680000000000  | 6.003870000000000  |
| F  | 8.722110000000001  | 5.664270000000000  | 8.971410000000001  |
| F  | 8.762180000000001  | 14.391090000000000 | 4.141500000000000  |
| F  | 8.548579999999999  | 14.353970000000000 | 10.907819999999999 |
| F  | 8.786490000000001  | 7.620630000000000  | 4.114000000000000  |
| F  | 8.628110000000000  | 7.588510000000000  | 10.881900000000000 |
| F  | 8.500540000000001  | 9.483950000000000  | 12.818809999999999 |
| H  | 12.844749999999999 | 12.698399999999999 | 6.158780000000000  |
| H  | 12.542940000000000 | 10.198440000000000 | 9.451680000000000  |
| H  | 13.573810000000000 | 9.652120000000000  | 10.461449999999999 |
| H  | 12.382059999999999 | 14.187480000000001 | 6.353830000000000  |
| H  | 11.952450000000001 | 10.743530000000000 | 6.057360000000000  |
| H  | 13.373849999999999 | 10.377390000000000 | 5.544940000000000  |
| H  | 11.723000000000001 | 12.453960000000000 | 7.942410000000000  |
| O  | 10.699769999999999 | 10.860849999999999 | 7.583040000000000  |
| O  | 13.024050000000001 | 9.385570000000000  | 9.704660000000001  |
| O  | 12.642560000000000 | 11.004730000000000 | 5.404430000000000  |
| O  | 12.694110000000000 | 13.404610000000000 | 6.838510000000000  |
| O  | 11.334899999999999 | 11.728960000000001 | 8.526230000000000  |
| N  | 8.619990000000000  | 12.993670000000000 | 7.518000000000000  |
| N  | 8.649030000000000  | 8.980200000000000  | 7.504100000000000  |
| N  | 8.712160000000001  | 10.999350000000000 | 5.510860000000000  |
| N  | 8.554610000000000  | 10.976310000000000 | 9.514260000000000  |



Transition Metal: Co; Functional Group: H; Adsorbate: OH

|    |                    |                    |                    |
|----|--------------------|--------------------|--------------------|
| Co | 5.681080000000000  | 11.014160000000000 | 10.985160000000000 |
| H  | 5.121070000000000  | 12.360889999999999 | 5.924860000000000  |
| H  | 5.080690000000000  | 9.631280000000000  | 5.940660000000000  |
| H  | 5.619670000000000  | 16.081669999999999 | 9.600330000000000  |
| H  | 5.632170000000000  | 16.091560000000001 | 12.329590000000000 |
| H  | 5.229280000000000  | 12.402040000000000 | 16.045430000000000 |
| H  | 5.510220000000000  | 5.939700000000000  | 9.641610000000000  |
| H  | 5.560800000000000  | 5.948270000000000  | 12.370860000000000 |
| H  | 5.426720000000000  | 14.202950000000000 | 7.773420000000000  |
| H  | 5.467500000000000  | 14.229200000000001 | 14.171860000000001 |
| H  | 5.335350000000000  | 7.803890000000000  | 7.806320000000000  |
| H  | 5.441030000000000  | 7.828390000000000  | 14.199500000000000 |
| H  | 5.223750000000000  | 9.673109999999999  | 16.057130000000001 |
| H  | 7.953460000000000  | 11.890120000000000 | 10.842359999999999 |
| H  | 9.456329999999999  | 14.173909999999999 | 12.057510000000001 |
| H  | 8.689090000000000  | 10.769180000000000 | 12.491360000000000 |
| H  | 10.050390000000000 | 10.310900000000000 | 13.086670000000000 |
| H  | 9.726910000000000  | 12.658230000000000 | 12.259270000000001 |
| H  | 8.628740000000001  | 9.759919999999999  | 9.910620000000000  |
| H  | 9.885880000000000  | 9.643540000000000  | 9.015350000000000  |
| C  | 5.619940000000000  | 15.239780000000000 | 11.652100000000001 |
| C  | 5.571580000000000  | 13.857559999999999 | 12.076919999999999 |
| C  | 5.467730000000000  | 13.454359999999999 | 13.403910000000000 |
| C  | 5.522860000000000  | 6.789510000000000  | 10.320830000000001 |
| C  | 5.489690000000000  | 8.173890000000000  | 9.898099999999999  |
| C  | 5.360660000000000  | 8.577790000000000  | 8.574930000000000  |
| C  | 5.549600000000000  | 6.794090000000000  | 11.686590000000001 |
| C  | 5.531340000000000  | 8.181580000000000  | 12.100500000000000 |
| C  | 5.613260000000000  | 15.235130000000000 | 10.284480000000000 |
| C  | 5.444840000000000  | 8.596159999999999  | 13.424429999999999 |
| C  | 5.169210000000000  | 11.685680000000000 | 6.776570000000000  |
| C  | 5.557930000000000  | 13.849930000000001 | 9.870550000000000  |
| C  | 5.292720000000000  | 12.109410000000000 | 8.150230000000001  |
| C  | 5.147180000000000  | 10.315580000000001 | 6.784460000000000  |
| C  | 5.258870000000000  | 9.903330000000000  | 8.163190000000000  |
| C  | 5.431290000000000  | 13.435499999999999 | 8.548959999999999  |
| C  | 5.263700000000000  | 11.719379999999999 | 15.198930000000001 |
| C  | 5.350350000000000  | 12.131250000000000 | 13.818669999999999 |
| C  | 5.260620000000000  | 10.349060000000000 | 15.204879999999999 |
| C  | 5.343110000000000  | 9.924620000000001  | 13.827890000000000 |
| O  | 7.610660000000000  | 10.978740000000000 | 10.967660000000000 |
| O  | 9.357320000000000  | 10.985390000000001 | 13.193220000000000 |
| O  | 9.171840000000000  | 9.109040000000000  | 9.402380000000001  |
| O  | 9.673170000000001  | 13.361810000000000 | 11.568890000000000 |
| N  | 5.562530000000000  | 13.012680000000000 | 10.976810000000000 |
| N  | 5.522950000000000  | 9.018129999999999  | 10.996060000000000 |
| N  | 5.311810000000000  | 11.010370000000000 | 8.997859999999999  |
| N  | 5.362110000000000  | 11.024470000000001 | 12.981760000000000 |

Transition Metal: Co; Functional Group: H; Adsorbate: OOH

|    |                    |                    |                    |
|----|--------------------|--------------------|--------------------|
| Co | 5.433880000000000  | 11.008559999999999 | 11.021550000000000 |
| H  | 5.368670000000000  | 12.410800000000000 | 5.949610000000000  |
| H  | 5.346650000000000  | 9.680740000000000  | 5.932220000000000  |
| H  | 5.243180000000000  | 16.091670000000001 | 9.681410000000000  |
| H  | 5.129300000000000  | 16.067820000000001 | 12.409110000000000 |
| H  | 5.039830000000000  | 12.334510000000000 | 16.085560000000001 |
| H  | 5.298110000000000  | 5.946330000000000  | 9.607900000000001  |
| H  | 5.263020000000000  | 5.927080000000000  | 12.339689999999999 |
| H  | 5.371910000000000  | 14.232340000000001 | 7.833140000000000  |
| H  | 5.117610000000000  | 14.180840000000000 | 14.229460000000000 |
| H  | 5.347720000000000  | 7.834120000000000  | 7.789420000000000  |
| H  | 5.246730000000000  | 7.785930000000000  | 14.186500000000001 |
| H  | 5.103450000000000  | 9.603730000000001  | 16.066690000000001 |
| H  | 9.451230000000001  | 12.676399999999999 | 9.723409999999999  |
| H  | 9.115900000000000  | 10.107920000000000 | 12.927930000000000 |
| H  | 10.164389999999999 | 9.787229999999999  | 14.009119999999999 |
| H  | 8.777300000000000  | 14.073890000000000 | 9.897150000000000  |
| H  | 8.476630000000000  | 10.785030000000001 | 9.562910000000000  |
| H  | 9.916119999999999  | 10.336360000000001 | 9.198820000000000  |
| H  | 8.356960000000001  | 12.385400000000001 | 11.492110000000000 |
| C  | 5.192850000000000  | 15.225320000000000 | 11.723030000000000 |
| C  | 5.210450000000000  | 13.838500000000000 | 12.129350000000001 |
| C  | 5.157350000000000  | 13.415360000000000 | 13.452360000000001 |
| C  | 5.288650000000000  | 6.788730000000000  | 10.296650000000000 |
| C  | 5.290110000000000  | 8.177519999999999  | 9.890720000000000  |
| C  | 5.328320000000000  | 8.599570000000000  | 8.567019999999999  |
| C  | 5.270020000000000  | 6.779100000000000  | 11.663340000000000 |
| C  | 5.255110000000000  | 8.160729999999999  | 12.089820000000000 |
| C  | 5.252850000000000  | 15.237209999999999 | 10.355960000000000 |
| C  | 5.234080000000000  | 8.561950000000000  | 13.419710000000000 |
| C  | 5.364290000000000  | 11.723260000000000 | 6.793490000000000  |
| C  | 5.305490000000000  | 13.856660000000000 | 9.929720000000000  |
| C  | 5.359610000000000  | 12.130490000000000 | 8.180210000000001  |
| C  | 5.352020000000000  | 10.356460000000000 | 6.784960000000000  |
| C  | 5.341050000000000  | 9.930149999999999  | 8.165880000000000  |
| C  | 5.356000000000000  | 13.455150000000000 | 8.599760000000000  |
| C  | 5.092340000000000  | 11.659060000000000 | 15.233890000000001 |
| C  | 5.142630000000000  | 12.085150000000001 | 13.852790000000001 |
| C  | 5.123220000000000  | 10.292430000000000 | 15.224390000000000 |
| C  | 5.185940000000000  | 9.885949999999999  | 13.837930000000000 |
| O  | 7.300820000000000  | 10.832660000000001 | 11.055470000000000 |
| O  | 9.674550000000000  | 9.380820000000000  | 13.273650000000000 |
| O  | 9.232609999999999  | 10.986179999999999 | 8.957060000000000  |
| O  | 9.311030000000001  | 13.413910000000000 | 10.372930000000000 |
| O  | 7.972620000000000  | 11.634630000000000 | 12.039540000000001 |
| N  | 5.272920000000000  | 13.000450000000001 | 11.023750000000000 |
| N  | 5.251140000000000  | 9.014609999999999  | 10.996600000000001 |
| N  | 5.334180000000000  | 11.024620000000001 | 9.021260000000000  |
| N  | 5.180560000000000  | 10.991289999999999 | 12.999820000000000 |

Transition Metal: Cr; Functional Group: F; Adsorbate: OH

|    |                    |                    |                    |
|----|--------------------|--------------------|--------------------|
| C  | 8.923730000000001  | 15.249120000000000 | 8.162820000000000  |
| C  | 8.918130000000000  | 13.873910000000000 | 8.589980000000001  |
| C  | 8.923389999999999  | 13.422750000000001 | 9.913950000000000  |
| C  | 8.798990000000000  | 6.725190000000000  | 6.791130000000000  |
| C  | 8.850009999999999  | 8.100030000000000  | 6.364320000000000  |
| C  | 8.880890000000001  | 8.550459999999999  | 5.039500000000000  |
| C  | 8.801869999999999  | 6.724700000000000  | 8.164389999999999  |
| C  | 8.855490000000000  | 8.100059999999999  | 8.589969999999999  |
| C  | 8.928490000000000  | 15.248120000000000 | 6.789990000000000  |
| C  | 8.894439999999999  | 8.551570000000000  | 9.913779999999999  |
| C  | 8.924799999999999  | 11.670120000000001 | 3.209490000000000  |
| C  | 8.925459999999999  | 13.871840000000001 | 6.364420000000000  |
| C  | 8.914170000000000  | 12.096159999999999 | 4.586830000000000  |
| C  | 8.914239999999999  | 10.298489999999999 | 3.208940000000000  |
| C  | 8.891990000000000  | 9.873329999999999  | 4.587130000000000  |
| C  | 8.934290000000001  | 13.418630000000000 | 5.040470000000000  |
| C  | 8.928290000000001  | 11.674580000000001 | 11.745939999999999 |
| C  | 8.910470000000000  | 12.100090000000000 | 10.368209999999999 |
| C  | 8.927600000000000  | 10.301890000000000 | 11.745970000000000 |
| C  | 8.905810000000001  | 9.874820000000000  | 10.368340000000000 |
| F  | 8.935530000000000  | 9.512250000000000  | 12.834180000000000 |
| F  | 8.936109999999999  | 12.461440000000000 | 2.123380000000000  |
| F  | 8.915660000000001  | 9.510350000000001  | 2.121420000000000  |
| F  | 8.929790000000001  | 16.334610000000001 | 5.998480000000000  |
| F  | 8.919890000000001  | 16.336150000000000 | 8.952260000000001  |
| F  | 8.940849999999999  | 12.463369999999999 | 12.834120000000000 |
| F  | 8.743110000000000  | 5.640150000000000  | 6.000340000000000  |
| F  | 8.749770000000000  | 5.638480000000000  | 8.955180000000000  |
| F  | 8.963699999999999  | 14.384499999999999 | 4.080250000000000  |
| F  | 8.943920000000000  | 14.386160000000000 | 10.876849999999999 |
| F  | 8.897810000000000  | 7.587810000000000  | 4.079110000000000  |
| F  | 8.919710000000000  | 7.585420000000000  | 10.875410000000000 |
| H  | 11.427519999999999 | 11.881360000000001 | 7.491650000000000  |
| H  | 13.365629999999999 | 13.507910000000001 | 7.421300000000000  |
| H  | 12.413330000000000 | 10.514880000000000 | 8.834180000000000  |
| H  | 13.140739999999999 | 10.448380000000000 | 10.215619999999999 |
| H  | 13.106830000000000 | 12.573070000000000 | 8.635910000000001  |
| H  | 11.967960000000000 | 10.136870000000000 | 5.994510000000000  |
| H  | 13.222400000000000 | 9.399190000000001  | 5.461860000000000  |
| O  | 11.044630000000000 | 10.967770000000000 | 7.481740000000000  |
| O  | 13.256550000000001 | 10.737909999999999 | 9.294940000000000  |
| O  | 12.366740000000000 | 9.761469999999999  | 5.175270000000000  |
| O  | 12.679610000000000 | 13.252630000000000 | 8.062350000000000  |
| N  | 8.912310000000000  | 13.037509999999999 | 7.477880000000000  |
| N  | 8.872529999999999  | 8.934799999999999  | 7.476910000000000  |
| N  | 8.884700000000000  | 10.984610000000000 | 5.421900000000000  |
| N  | 8.888980000000000  | 10.987520000000000 | 9.534340000000000  |
| Cr | 9.172340000000000  | 10.985530000000001 | 7.476420000000000  |

Transition Metal: Cr; Functional Group: F; Adsorbate: OOH

|    |                    |                    |                    |
|----|--------------------|--------------------|--------------------|
| C  | 8.827690000000000  | 15.248519999999999 | 8.217790000000001  |
| C  | 8.780680000000000  | 13.870039999999999 | 8.636139999999999  |
| C  | 8.727069999999999  | 13.409770000000000 | 9.956510000000000  |
| C  | 8.446600000000000  | 6.733910000000000  | 6.796450000000000  |
| C  | 8.544240000000000  | 8.110670000000001  | 6.379000000000000  |
| C  | 8.586390000000000  | 8.569670000000000  | 5.057920000000000  |
| C  | 8.454630000000000  | 6.725120000000000  | 8.169160000000000  |
| C  | 8.551850000000000  | 8.096900000000000  | 8.602700000000000  |
| C  | 8.893070000000000  | 15.255120000000000 | 6.846090000000000  |
| C  | 8.582860000000000  | 8.539990000000000  | 9.929840000000000  |
| C  | 8.766930000000000  | 11.697340000000001 | 3.246520000000000  |
| C  | 8.874070000000000  | 13.880739999999999 | 6.411750000000000  |
| C  | 8.817740000000001  | 12.114120000000000 | 4.625820000000000  |
| C  | 8.670660000000000  | 10.328329999999999 | 3.239000000000000  |
| C  | 8.666850000000000  | 9.893829999999999  | 4.613710000000000  |
| C  | 8.895860000000001  | 13.432779999999999 | 5.086200000000000  |
| C  | 8.614879999999999  | 11.653430000000000 | 11.776090000000000 |
| C  | 8.662520000000001  | 12.085390000000000 | 10.401759999999999 |
| C  | 8.593550000000000  | 10.280980000000000 | 11.769780000000001 |
| C  | 8.614120000000000  | 9.860920000000000  | 10.390689999999999 |
| F  | 8.544190000000000  | 9.489739999999999  | 12.854340000000001 |
| F  | 8.780030000000000  | 12.492960000000000 | 2.163200000000000  |
| F  | 8.574439999999999  | 9.549540000000000  | 2.147980000000000  |
| F  | 8.943090000000000  | 16.346430000000002 | 6.060560000000000  |
| F  | 8.794930000000001  | 16.331930000000000 | 9.013610000000000  |
| F  | 8.585649999999999  | 12.438770000000000 | 12.866690000000000 |
| F  | 8.350590000000000  | 5.656890000000000  | 5.997380000000000  |
| F  | 8.362480000000000  | 5.637930000000000  | 8.953650000000000  |
| F  | 8.975330000000000  | 14.400320000000001 | 4.128390000000000  |
| F  | 8.735160000000000  | 14.368729999999999 | 10.924490000000000 |
| F  | 8.535050000000000  | 7.614020000000000  | 4.088070000000000  |
| F  | 8.556580000000000  | 7.572210000000000  | 10.885820000000001 |
| H  | 13.358120000000000 | 12.261960000000000 | 6.308170000000000  |
| H  | 12.455750000000000 | 9.971900000000000  | 9.476419999999999  |
| H  | 13.334390000000001 | 9.275029999999999  | 10.540960000000000 |
| H  | 13.054300000000000 | 13.796900000000001 | 6.419440000000000  |
| H  | 12.256019999999999 | 10.407560000000000 | 6.156910000000000  |
| H  | 13.662250000000000 | 9.880960000000000  | 5.758000000000000  |
| H  | 12.073060000000000 | 12.212020000000001 | 7.996880000000000  |
| O  | 10.866860000000001 | 10.786500000000000 | 7.500880000000000  |
| O  | 12.769600000000001 | 9.091540000000000  | 9.771129999999999  |
| O  | 13.020410000000000 | 10.586140000000000 | 5.562430000000000  |
| O  | 13.258599999999999 | 13.009570000000000 | 6.952120000000000  |
| O  | 11.525060000000000 | 11.572630000000000 | 8.546680000000000  |
| N  | 8.802210000000001  | 13.042410000000000 | 7.519540000000000  |
| N  | 8.596180000000000  | 8.936550000000000  | 7.495740000000000  |
| N  | 8.750710000000000  | 10.998460000000000 | 5.455110000000000  |
| N  | 8.651080000000000  | 10.977390000000000 | 9.563219999999999  |
| Cr | 8.996409999999999  | 10.979699999999999 | 7.521210000000000  |

Transition Metal: Cr; Functional Group: H; Adsorbate: OH

|    |                   |                    |                    |
|----|-------------------|--------------------|--------------------|
| Cr | 5.498780000000000 | 10.988550000000000 | 10.987100000000000 |
| C  | 5.280460000000000 | 15.247900000000000 | 11.678850000000001 |
| C  | 5.282570000000000 | 13.864910000000000 | 12.101570000000001 |
| C  | 5.269770000000000 | 13.429240000000000 | 13.431580000000000 |
| C  | 5.081690000000000 | 6.740860000000000  | 10.301950000000000 |
| C  | 5.142360000000000 | 8.122660000000000  | 9.879330000000000  |
| C  | 5.128120000000000 | 8.557800000000000  | 8.550620000000000  |
| C  | 5.093960000000000 | 6.739100000000000  | 11.673610000000000 |
| C  | 5.162690000000000 | 8.120649999999999  | 12.098330000000001 |
| C  | 5.271360000000000 | 15.249730000000000 | 10.306509999999999 |
| C  | 5.171180000000000 | 8.553410000000000  | 13.428559999999999 |
| C  | 5.126660000000000 | 11.682210000000000 | 6.733730000000000  |
| C  | 5.266870000000000 | 13.867940000000001 | 9.880720000000000  |
| C  | 5.190270000000000 | 12.105300000000000 | 8.117030000000000  |
| C  | 5.096390000000000 | 10.311439999999999 | 6.735030000000000  |
| C  | 5.141850000000000 | 9.887440000000000  | 8.117920000000000  |
| C  | 5.235410000000000 | 13.434030000000000 | 8.550500000000000  |
| C  | 5.186070000000000 | 11.676539999999999 | 15.247719999999999 |
| C  | 5.234500000000000 | 12.100110000000001 | 13.864340000000000 |
| C  | 5.159070000000000 | 10.305920000000000 | 15.246610000000000 |
| C  | 5.190940000000000 | 9.882569999999999  | 13.863160000000001 |
| N  | 5.274470000000000 | 13.032340000000000 | 10.990110000000000 |
| N  | 5.192650000000000 | 8.954520000000000  | 10.989380000000001 |
| N  | 5.192060000000000 | 10.995810000000001 | 8.950609999999999  |
| N  | 5.230300000000000 | 10.991160000000001 | 13.030130000000000 |
| O  | 7.383720000000000 | 10.973290000000000 | 10.968340000000000 |
| O  | 9.340140000000000 | 10.982600000000000 | 13.008730000000000 |
| O  | 8.963530000000000 | 9.302049999999999  | 9.170059999999999  |
| O  | 9.347510000000000 | 13.222540000000000 | 11.203260000000000 |
| H  | 5.116670000000000 | 9.632389999999999  | 16.100200000000001 |
| H  | 5.104900000000000 | 12.355200000000000 | 5.878620000000000  |
| H  | 5.046120000000000 | 9.637650000000001  | 5.881740000000000  |
| H  | 5.259840000000000 | 16.105789999999999 | 9.634539999999999  |
| H  | 5.275120000000000 | 16.102570000000000 | 12.352800000000000 |
| H  | 5.171710000000000 | 12.349620000000000 | 16.102950000000000 |
| H  | 5.030860000000000 | 5.888320000000000  | 9.627219999999999  |
| H  | 5.053090000000000 | 5.884540000000000  | 12.346290000000000 |
| H  | 5.231510000000000 | 14.206980000000000 | 7.778920000000000  |
| H  | 5.271640000000000 | 14.201210000000000 | 14.204280000000001 |
| H  | 5.096200000000000 | 7.786480000000000  | 7.778560000000000  |
| H  | 5.143610000000000 | 7.780590000000000  | 14.199640000000000 |
| H  | 7.748070000000000 | 11.874800000000000 | 10.815670000000001 |
| H  | 9.129370000000000 | 14.054259999999999 | 11.657719999999999 |
| H  | 8.575120000000000 | 10.759150000000000 | 12.417669999999999 |
| H  | 9.998600000000000 | 10.290020000000000 | 12.825329999999999 |
| H  | 9.557140000000000 | 12.585770000000000 | 11.929510000000001 |
| H  | 8.392650000000000 | 9.874650000000001  | 9.735670000000001  |
| H  | 9.518520000000001 | 9.931480000000001  | 8.678970000000000  |

Transition Metal: Cr; Functional Group: H; Adsorbate: OOH

|    |                    |                    |                    |
|----|--------------------|--------------------|--------------------|
| Cr | 5.720630000000000  | 10.978280000000000 | 11.021910000000000 |
| C  | 5.550280000000000  | 15.240200000000000 | 11.740910000000000 |
| C  | 5.528720000000000  | 13.853030000000000 | 12.151660000000000 |
| C  | 5.480050000000000  | 13.405490000000000 | 13.476760000000001 |
| C  | 5.198980000000000  | 6.743170000000000  | 10.288919999999999 |
| C  | 5.293530000000000  | 8.129140000000000  | 9.879239999999999  |
| C  | 5.316790000000000  | 8.575810000000001  | 8.553730000000000  |
| C  | 5.188860000000000  | 6.730710000000000  | 11.659789999999999 |
| C  | 5.275610000000000  | 8.108670000000000  | 12.095980000000001 |
| C  | 5.566270000000000  | 15.253080000000001 | 10.368220000000001 |
| C  | 5.273060000000000  | 8.530810000000001  | 13.429240000000000 |
| C  | 5.412870000000000  | 11.716989999999999 | 6.765740000000000  |
| C  | 5.554610000000000  | 13.872940000000000 | 9.931660000000001  |
| C  | 5.477970000000000  | 12.125190000000000 | 8.152320000000000  |
| C  | 5.348220000000000  | 10.346950000000000 | 6.753440000000000  |
| C  | 5.373540000000000  | 9.909190000000001  | 8.132500000000000  |
| C  | 5.539850000000000  | 13.450070000000000 | 8.597239999999999  |
| C  | 5.317010000000000  | 11.639780000000000 | 15.274260000000000 |
| C  | 5.404840000000000  | 12.073140000000000 | 13.896190000000001 |
| C  | 5.261280000000000  | 10.269130000000001 | 15.261500000000000 |
| C  | 5.312800000000000  | 9.856560000000000  | 13.874980000000001 |
| N  | 5.536080000000000  | 13.030090000000000 | 11.034470000000001 |
| N  | 5.337510000000000  | 8.949859999999999  | 10.995460000000000 |
| N  | 5.450440000000000  | 11.008089999999999 | 8.976200000000000  |
| N  | 5.396020000000000  | 10.971120000000001 | 13.054029999999999 |
| O  | 7.600600000000000  | 10.785980000000000 | 10.920710000000000 |
| O  | 9.704800000000001  | 9.415340000000000  | 13.770200000000001 |
| O  | 9.386049999999999  | 11.239860000000000 | 8.731590000000001  |
| O  | 9.475730000000000  | 13.491630000000001 | 10.447699999999999 |
| O  | 8.306410000000000  | 11.464399999999999 | 12.010149999999999 |
| H  | 5.179960000000000  | 9.591650000000000  | 16.109310000000001 |
| H  | 5.412010000000000  | 12.399509999999999 | 5.918140000000000  |
| H  | 5.286410000000000  | 9.682950000000000  | 5.893270000000000  |
| H  | 5.566830000000000  | 16.114999999999998 | 9.703160000000000  |
| H  | 5.538040000000000  | 16.089140000000000 | 12.422079999999999 |
| H  | 5.293420000000000  | 12.305569999999999 | 16.134950000000000 |
| H  | 5.141960000000000  | 5.896430000000000  | 9.607580000000000  |
| H  | 5.122830000000000  | 5.872120000000000  | 12.325260000000000 |
| H  | 5.554760000000000  | 14.228790000000000 | 7.831460000000000  |
| H  | 5.481060000000000  | 14.169000000000000 | 14.257669999999999 |
| H  | 5.268540000000000  | 7.812700000000000  | 7.773920000000000  |
| H  | 5.218410000000000  | 7.754110000000000  | 14.194770000000000 |
| H  | 8.697749999999999  | 12.254490000000001 | 11.533280000000000 |
| H  | 9.574030000000000  | 12.863270000000000 | 9.687960000000000  |
| H  | 9.285840000000000  | 10.046910000000000 | 13.147600000000001 |
| H  | 9.185900000000000  | 9.517340000000001  | 14.586320000000001 |
| H  | 8.841240000000001  | 14.164210000000001 | 10.143490000000000 |
| H  | 8.729740000000000  | 10.908670000000001 | 9.394050000000000  |
| H  | 10.135470000000000 | 10.622590000000001 | 8.793480000000001  |

Transition Metal: Cu; Functional Group: F; Adsorbate: OH

|    |                    |                    |                    |
|----|--------------------|--------------------|--------------------|
| C  | 8.963800000000001  | 15.270910000000001 | 8.177840000000000  |
| C  | 8.924239999999999  | 13.889670000000001 | 8.598229999999999  |
| C  | 8.903290000000000  | 13.435169999999999 | 9.924090000000000  |
| C  | 8.657610000000000  | 6.745750000000000  | 6.804990000000000  |
| C  | 8.724620000000000  | 8.126609999999999  | 6.386020000000000  |
| C  | 8.746930000000001  | 8.579910000000000  | 5.059910000000000  |
| C  | 8.664370000000000  | 6.744490000000000  | 8.176589999999999  |
| C  | 8.734740000000000  | 8.125159999999999  | 8.597860000000001  |
| C  | 8.958200000000000  | 15.271690000000000 | 6.806150000000000  |
| C  | 8.760289999999999  | 8.579520000000000  | 9.923480000000000  |
| C  | 8.799620000000001  | 11.692769999999999 | 3.216310000000000  |
| C  | 8.914949999999999  | 13.890739999999999 | 6.384080000000000  |
| C  | 8.816060000000000  | 12.113870000000000 | 4.599380000000000  |
| C  | 8.770140000000000  | 10.321800000000000 | 3.218300000000000  |
| C  | 8.760899999999999  | 9.903960000000000  | 4.601480000000000  |
| C  | 8.884420000000000  | 13.435510000000001 | 5.058520000000000  |
| C  | 8.811959999999999  | 11.693669999999999 | 11.765910000000000 |
| C  | 8.834700000000000  | 12.113049999999999 | 10.382690000000000 |
| C  | 8.785180000000000  | 10.322920000000000 | 11.765990000000000 |
| C  | 8.780810000000001  | 9.902939999999999  | 10.383039999999999 |
| F  | 8.797180000000001  | 12.486079999999999 | 2.130930000000000  |
| F  | 8.741669999999999  | 9.527139999999999  | 2.135840000000000  |
| F  | 8.968130000000000  | 16.355360000000001 | 6.010470000000000  |
| F  | 8.977490000000000  | 16.353349999999999 | 8.973269999999999  |
| F  | 8.799429999999999  | 12.487830000000001 | 12.849650000000000 |
| F  | 8.574830000000000  | 5.666220000000000  | 6.009440000000000  |
| F  | 8.588050000000001  | 5.662990000000000  | 8.971990000000000  |
| F  | 8.932969999999999  | 14.396000000000001 | 4.100170000000000  |
| F  | 8.951449999999999  | 14.394240000000000 | 10.881290000000000 |
| F  | 8.744320000000000  | 7.621040000000000  | 4.105020000000000  |
| F  | 8.755599999999999  | 7.617890000000000  | 10.880960000000000 |
| F  | 8.751659999999999  | 9.528330000000000  | 12.849050000000000 |
| H  | 11.480680000000000 | 11.836600000000001 | 7.243060000000000  |
| H  | 13.557720000000000 | 14.113450000000000 | 8.486990000000000  |
| H  | 12.061900000000000 | 10.845140000000001 | 8.959220000000000  |
| H  | 13.353579999999999 | 10.411009999999999 | 9.744260000000001  |
| H  | 12.878819999999999 | 12.840630000000001 | 9.070010000000000  |
| H  | 11.759470000000000 | 9.741970000000000  | 6.253570000000000  |
| H  | 12.895230000000000 | 9.129189999999999  | 5.368850000000000  |
| O  | 11.156520000000000 | 10.939299999999999 | 7.459080000000000  |
| O  | 12.613580000000001 | 11.041370000000001 | 9.775309999999999  |
| O  | 11.962230000000000 | 9.007640000000000  | 5.611570000000000  |
| O  | 12.716699999999999 | 13.625750000000000 | 8.492900000000001  |
| N  | 8.884119999999999  | 13.061769999999999 | 7.491490000000000  |
| N  | 8.753959999999999  | 8.954269999999999  | 7.491610000000000  |
| N  | 8.766510000000000  | 11.008740000000000 | 5.429100000000000  |
| N  | 8.790060000000000  | 11.008039999999999 | 9.553850000000001  |
| Cu | 9.113989999999999  | 10.997640000000001 | 7.491580000000000  |

Transition Metal: Cu; Functional Group: F; Adsorbate: OOH

|    |                    |                    |                    |
|----|--------------------|--------------------|--------------------|
| C  | 8.501590000000000  | 15.243090000000000 | 8.222780000000000  |
| C  | 8.516200000000000  | 13.862930000000000 | 8.646879999999999  |
| C  | 8.542289999999999  | 13.415270000000000 | 9.970310000000000  |
| C  | 8.393850000000000  | 6.723340000000000  | 6.858270000000000  |
| C  | 8.411780000000000  | 8.103690000000000  | 6.433320000000000  |
| C  | 8.397140000000000  | 8.549709999999999  | 5.109090000000000  |
| C  | 8.414920000000000  | 6.724200000000000  | 8.228310000000000  |
| C  | 8.450089999999999  | 8.104850000000001  | 8.650300000000000  |
| C  | 8.447850000000001  | 15.243140000000000 | 6.852940000000000  |
| C  | 8.488680000000000  | 8.551250000000000  | 9.973509999999999  |
| C  | 8.384069999999999  | 11.666079999999999 | 3.278200000000000  |
| C  | 8.442190000000000  | 13.862909999999999 | 6.428740000000000  |
| C  | 8.403150000000000  | 12.090579999999999 | 4.658290000000000  |
| C  | 8.383490000000000  | 10.296450000000000 | 3.278930000000000  |
| C  | 8.400820000000000  | 9.872270000000000  | 4.659640000000000  |
| C  | 8.409770000000000  | 13.413860000000000 | 5.105660000000000  |
| C  | 8.557169999999999  | 11.668979999999999 | 11.798819999999999 |
| C  | 8.533640000000000  | 12.092150000000000 | 10.418150000000001 |
| C  | 8.544129999999999  | 10.299440000000001 | 11.799650000000000 |
| C  | 8.509190000000000  | 9.874779999999999  | 10.419820000000000 |
| F  | 8.558160000000001  | 9.508419999999999  | 12.886220000000000 |
| F  | 8.368470000000000  | 12.459099999999999 | 2.191210000000000  |
| F  | 8.365840000000000  | 9.505240000000001  | 2.191780000000000  |
| F  | 8.403390000000000  | 16.330150000000000 | 6.058240000000000  |
| F  | 8.530640000000000  | 16.330190000000002 | 9.015980000000001  |
| F  | 8.583180000000000  | 12.462569999999999 | 12.885059999999999 |
| F  | 8.357260000000000  | 5.637570000000000  | 6.063740000000000  |
| F  | 8.395429999999999  | 5.640600000000000  | 9.024690000000000  |
| F  | 8.386350000000000  | 14.380350000000000 | 4.141000000000000  |
| F  | 8.572850000000001  | 14.381320000000001 | 10.932630000000000 |
| F  | 8.372700000000000  | 7.584290000000000  | 4.146260000000000  |
| F  | 8.508260000000000  | 7.589020000000000  | 10.934160000000000 |
| H  | 13.142360000000000 | 12.638620000000000 | 5.603750000000000  |
| H  | 12.249630000000000 | 9.650230000000001  | 9.597560000000000  |
| H  | 12.794969999999999 | 8.665850000000001  | 10.657080000000001 |
| H  | 12.663010000000000 | 14.133020000000000 | 5.758870000000000  |
| H  | 12.649860000000000 | 10.691879999999999 | 6.254600000000000  |
| H  | 13.466600000000000 | 10.247980000000000 | 4.999410000000000  |
| H  | 12.830769999999999 | 12.906020000000000 | 7.634280000000000  |
| O  | 12.409649999999999 | 11.134729999999999 | 8.179390000000000  |
| O  | 12.074500000000000 | 8.781240000000000  | 10.014239999999999 |
| O  | 12.788209999999999 | 10.878830000000001 | 5.296610000000000  |
| O  | 13.232150000000001 | 13.455810000000000 | 6.164090000000000  |
| O  | 12.624040000000001 | 12.422960000000000 | 8.527900000000001  |
| N  | 8.484180000000000  | 13.030799999999999 | 7.537900000000000  |
| N  | 8.443740000000000  | 8.936340000000000  | 7.541410000000000  |
| N  | 8.412080000000000  | 10.981740000000000 | 5.491450000000000  |
| N  | 8.499790000000001  | 10.982550000000000 | 9.587190000000000  |
| Cu | 8.465280000000000  | 10.981619999999999 | 7.540730000000000  |



Transition Metal: Cu; Functional Group: H; Adsorbate: OH

|    |                   |                    |                    |
|----|-------------------|--------------------|--------------------|
| Cu | 5.539480000000000 | 10.984780000000001 | 11.002500000000000 |
| H  | 5.279770000000000 | 12.351680000000000 | 5.886300000000000  |
| H  | 5.180090000000000 | 9.631910000000000  | 5.893140000000000  |
| H  | 5.473470000000000 | 16.103210000000001 | 9.634720000000000  |
| H  | 5.451920000000000 | 16.107679999999998 | 12.355200000000000 |
| H  | 5.255820000000000 | 12.362340000000000 | 16.112919999999999 |
| H  | 5.129940000000000 | 5.890790000000000  | 9.644259999999999  |
| H  | 5.139330000000000 | 5.891840000000000  | 12.366410000000000 |
| H  | 5.407820000000000 | 14.198440000000000 | 7.789600000000000  |
| H  | 5.370970000000000 | 14.205050000000000 | 14.205800000000000 |
| H  | 5.177690000000000 | 7.790460000000000  | 7.799210000000000  |
| H  | 5.191820000000000 | 7.796430000000000  | 14.210340000000000 |
| H  | 5.181080000000000 | 9.642450000000000  | 16.112980000000000 |
| H  | 7.875330000000000 | 11.834669999999999 | 10.720599999999999 |
| H  | 9.414330000000000 | 14.225429999999999 | 12.104179999999999 |
| H  | 8.536720000000001 | 10.884639999999999 | 12.435280000000001 |
| H  | 9.869180000000000 | 10.369730000000001 | 13.081120000000000 |
| H  | 9.653850000000000 | 12.700379999999999 | 12.249980000000001 |
| H  | 8.451779999999999 | 9.765990000000000  | 9.852770000000000  |
| H  | 9.791800000000000 | 9.539680000000001  | 9.100030000000000  |
| C  | 5.433450000000000 | 15.252340000000000 | 11.682219999999999 |
| C  | 5.385560000000000 | 13.866420000000000 | 12.103840000000000 |
| C  | 5.350380000000000 | 13.432610000000000 | 13.434310000000000 |
| C  | 5.156140000000000 | 6.743190000000000  | 10.320390000000000 |
| C  | 5.194330000000000 | 8.130559999999999  | 9.900050000000000  |
| C  | 5.193900000000000 | 8.563910000000000  | 8.570100000000000  |
| C  | 5.161960000000000 | 6.743930000000000  | 11.690110000000001 |
| C  | 5.203310000000000 | 8.131869999999999  | 12.108440000000000 |
| C  | 5.443240000000000 | 15.250990000000000 | 10.311270000000000 |
| C  | 5.210000000000000 | 8.568030000000000  | 13.437740000000000 |
| C  | 5.265860000000000 | 11.678369999999999 | 6.741200000000000  |
| C  | 5.397710000000000 | 13.864520000000001 | 9.892600000000000  |
| C  | 5.300110000000000 | 12.099660000000000 | 8.128970000000001  |
| C  | 5.214900000000000 | 10.309460000000000 | 6.744280000000000  |
| C  | 5.219000000000000 | 9.892700000000000  | 8.133229999999999  |
| C  | 5.370880000000000 | 13.427740000000000 | 8.562540000000000  |
| C  | 5.251980000000000 | 11.687430000000001 | 15.259350000000000 |
| C  | 5.290670000000000 | 12.105020000000000 | 13.870900000000001 |
| C  | 5.215600000000000 | 10.318230000000000 | 15.260170000000000 |
| C  | 5.230110000000000 | 9.897869999999999  | 13.872430000000000 |
| O  | 7.583450000000000 | 10.937279999999999 | 10.981479999999999 |
| O  | 9.202330000000000 | 11.072699999999999 | 13.165200000000000 |
| O  | 8.944699999999999 | 9.105630000000000  | 9.297580000000000  |
| O  | 9.688580000000000 | 13.442670000000000 | 11.597160000000001 |
| N  | 5.357150000000000 | 13.037509999999999 | 10.998810000000001 |
| N  | 5.214270000000000 | 8.959490000000001  | 11.003840000000000 |
| N  | 5.252240000000000 | 10.997280000000000 | 8.959860000000001  |
| N  | 5.258660000000000 | 11.000330000000000 | 13.043200000000001 |

Transition Metal: Cu; Functional Group: H; Adsorbate: OOH

|    |                    |                    |                    |
|----|--------------------|--------------------|--------------------|
| H  | 5.002110000000000  | 9.626139999999999  | 16.079370000000001 |
| H  | 4.952870000000000  | 12.360770000000000 | 5.871650000000000  |
| H  | 4.944840000000000  | 9.638690000000000  | 5.870450000000000  |
| H  | 4.991710000000000  | 16.104930000000000 | 9.624480000000000  |
| H  | 5.004260000000000  | 16.098649999999999 | 12.345560000000001 |
| H  | 4.999120000000000  | 12.347709999999999 | 16.084940000000000 |
| H  | 4.974120000000000  | 5.890900000000000  | 9.611050000000001  |
| H  | 4.996120000000000  | 5.889380000000000  | 12.333620000000000 |
| H  | 4.972630000000000  | 14.207850000000001 | 7.770730000000000  |
| H  | 5.000170000000000  | 14.198130000000001 | 14.190619999999999 |
| H  | 4.956740000000000  | 7.790290000000000  | 7.765240000000000  |
| H  | 5.004330000000000  | 7.783570000000000  | 14.181419999999999 |
| H  | 9.635540000000001  | 12.587569999999999 | 9.247339999999999  |
| H  | 8.961110000000000  | 9.536370000000000  | 13.178500000000000 |
| H  | 9.999150000000000  | 8.998150000000001  | 14.178500000000000 |
| H  | 8.873780000000000  | 13.947419999999999 | 9.426640000000001  |
| H  | 9.157650000000000  | 10.623580000000000 | 9.818550000000000  |
| H  | 10.197030000000000 | 10.230420000000001 | 8.724970000000001  |
| H  | 9.267810000000001  | 12.777300000000000 | 11.266790000000000 |
| C  | 5.001630000000000  | 15.246370000000001 | 11.668690000000000 |
| C  | 4.996270000000000  | 13.858850000000000 | 12.086550000000001 |
| C  | 4.992560000000000  | 13.427250000000001 | 13.416779999999999 |
| C  | 4.974390000000000  | 6.743550000000000  | 10.287760000000000 |
| C  | 4.967680000000000  | 8.131370000000000  | 9.868320000000001  |
| C  | 4.960600000000000  | 8.561750000000000  | 8.538500000000001  |
| C  | 4.983700000000000  | 6.742160000000000  | 11.657570000000000 |
| C  | 4.980230000000000  | 8.129280000000000  | 12.079810000000000 |
| C  | 4.997010000000000  | 15.249169999999999 | 10.297530000000000 |
| C  | 4.985080000000000  | 8.556179999999999  | 13.410530000000000 |
| C  | 4.957160000000000  | 11.684749999999999 | 6.724730000000000  |
| C  | 4.989380000000000  | 13.862700000000000 | 9.874050000000000  |
| C  | 4.968980000000000  | 12.104279999999999 | 8.112200000000000  |
| C  | 4.952630000000000  | 10.314520000000000 | 6.723770000000000  |
| C  | 4.961240000000000  | 9.892899999999999  | 8.110780000000000  |
| C  | 4.978890000000000  | 13.434620000000001 | 8.542380000000000  |
| C  | 4.990450000000000  | 11.673140000000000 | 15.230610000000000 |
| C  | 4.983930000000000  | 12.096349999999999 | 13.843050000000000 |
| C  | 4.990660000000000  | 10.303710000000001 | 15.228000000000000 |
| C  | 4.982040000000000  | 9.885640000000000  | 13.840190000000000 |
| O  | 8.806690000000000  | 10.994840000000000 | 11.737550000000001 |
| O  | 9.197469999999999  | 8.736760000000000  | 13.694089999999999 |
| O  | 9.442090000000000  | 10.820100000000000 | 8.894539999999999  |
| O  | 9.604699999999999  | 13.419350000000000 | 9.794240000000000  |
| O  | 9.105520000000000  | 12.251820000000000 | 12.142730000000000 |
| Cu | 4.981220000000000  | 10.993610000000000 | 10.978500000000000 |
| N  | 4.990250000000000  | 13.030440000000000 | 10.979010000000001 |
| N  | 4.971080000000000  | 8.960770000000000  | 10.974750000000000 |
| N  | 4.969820000000000  | 10.997940000000000 | 8.942200000000000  |
| N  | 4.975570000000000  | 10.992000000000001 | 13.011010000000001 |

Transition Metal: Fe; Functional Group: F; Adsorbate: OH

|    |                    |                    |                    |
|----|--------------------|--------------------|--------------------|
| C  | 8.838480000000001  | 15.290240000000001 | 8.191710000000000  |
| C  | 8.758390000000000  | 13.915680000000000 | 8.618610000000000  |
| C  | 8.704630000000000  | 13.458800000000000 | 9.942959999999999  |
| C  | 8.671659999999999  | 6.747380000000000  | 6.815160000000000  |
| C  | 8.630710000000001  | 8.124840000000001  | 6.390740000000000  |
| C  | 8.582269999999999  | 8.585380000000001  | 5.066820000000000  |
| C  | 8.701029999999999  | 6.746490000000000  | 8.190099999999999  |
| C  | 8.677680000000001  | 8.123630000000000  | 8.617310000000000  |
| C  | 8.841749999999999  | 15.289859999999999 | 6.816930000000000  |
| C  | 8.669710000000000  | 8.584490000000001  | 9.942349999999999  |
| C  | 8.570660000000000  | 11.707409999999999 | 3.230170000000000  |
| C  | 8.763150000000000  | 13.914650000000000 | 6.390830000000000  |
| C  | 8.629410000000000  | 12.133250000000000 | 4.608380000000000  |
| C  | 8.535840000000000  | 10.334860000000001 | 3.231890000000000  |
| C  | 8.568840000000000  | 9.910410000000001  | 4.610840000000000  |
| C  | 8.710990000000001  | 13.456270000000000 | 5.066410000000000  |
| C  | 8.577610000000000  | 11.708280000000000 | 11.779930000000000 |
| C  | 8.635710000000000  | 12.134940000000000 | 10.401710000000000 |
| C  | 8.576160000000000  | 10.334410000000000 | 11.779190000000000 |
| C  | 8.628489999999999  | 9.908820000000000  | 10.401199999999999 |
| F  | 8.523910000000001  | 9.546410000000000  | 12.867459999999999 |
| F  | 8.550219999999999  | 12.494800000000000 | 2.140560000000000  |
| F  | 8.485900000000001  | 9.547129999999999  | 2.144780000000000  |
| F  | 8.908210000000000  | 16.376639999999998 | 6.028400000000000  |
| F  | 8.901140000000000  | 16.377520000000001 | 8.978809999999999  |
| F  | 8.527350000000000  | 12.494780000000000 | 12.868910000000000 |
| F  | 8.686070000000001  | 5.658270000000000  | 6.027620000000000  |
| F  | 8.741250000000001  | 5.656740000000000  | 8.977200000000000  |
| F  | 8.738899999999999  | 14.420790000000000 | 4.103310000000000  |
| F  | 8.722350000000000  | 14.422720000000000 | 10.906490000000000 |
| F  | 8.552020000000001  | 7.623640000000000  | 4.104410000000000  |
| F  | 8.703810000000001  | 7.621450000000000  | 10.907579999999999 |
| H  | 11.522080000000001 | 11.823950000000000 | 7.518540000000000  |
| H  | 13.421980000000000 | 13.274730000000000 | 7.151080000000000  |
| H  | 12.551930000000000 | 10.358129999999999 | 8.756560000000000  |
| H  | 13.406680000000000 | 10.288060000000000 | 10.057930000000001 |
| H  | 13.313650000000001 | 12.419260000000000 | 8.444599999999999  |
| H  | 11.894850000000000 | 10.110620000000001 | 5.968660000000000  |
| H  | 13.076610000000001 | 9.314769999999999  | 5.361760000000000  |
| O  | 11.031040000000001 | 10.959490000000001 | 7.498220000000000  |
| O  | 13.437080000000000 | 10.572530000000000 | 9.128520000000000  |
| O  | 12.245189999999999 | 9.757360000000000  | 5.119720000000000  |
| O  | 12.831000000000000 | 13.085360000000000 | 7.901000000000000  |
| N  | 8.727100000000000  | 13.086639999999999 | 7.505220000000000  |
| N  | 8.642379999999999  | 8.951860000000000  | 7.504580000000000  |
| N  | 8.617960000000000  | 11.022080000000001 | 5.437750000000000  |
| N  | 8.653400000000000  | 11.022340000000000 | 9.574540000000001  |
| Fe | 9.161840000000000  | 11.011939999999999 | 7.500400000000000  |

Transition Metal: Fe; Functional Group: F; Adsorbate: OOH

|    |                    |                    |                    |
|----|--------------------|--------------------|--------------------|
| C  | 8.765140000000001  | 15.238400000000000 | 8.224550000000001  |
| C  | 8.683920000000001  | 13.861079999999999 | 8.640340000000000  |
| C  | 8.614160000000000  | 13.421980000000000 | 9.959660000000000  |
| C  | 8.496900000000000  | 6.764290000000000  | 6.827040000000000  |
| C  | 8.545710000000000  | 8.143050000000001  | 6.410870000000000  |
| C  | 8.563230000000001  | 8.583330000000000  | 5.090360000000000  |
| C  | 8.541440000000000  | 6.759920000000000  | 8.195040000000001  |
| C  | 8.601279999999999  | 8.137079999999999  | 8.618600000000001  |
| C  | 8.862550000000001  | 15.236990000000000 | 6.858380000000000  |
| C  | 8.625900000000000  | 8.570840000000000  | 9.941380000000001  |
| C  | 8.755720000000000  | 11.692959999999999 | 3.285490000000000  |
| C  | 8.831390000000001  | 13.859650000000000 | 6.433820000000000  |
| C  | 8.795349999999999  | 12.107820000000000 | 4.666580000000000  |
| C  | 8.650080000000001  | 10.329040000000001 | 3.280380000000000  |
| C  | 8.630720000000000  | 9.904480000000000  | 4.658520000000000  |
| C  | 8.881560000000000  | 13.423560000000000 | 5.111460000000000  |
| C  | 8.560250000000000  | 11.675000000000001 | 11.769560000000000 |
| C  | 8.587580000000001  | 12.099980000000000 | 10.392230000000000 |
| C  | 8.580159999999999  | 10.307090000000001 | 11.763470000000000 |
| C  | 8.615500000000001  | 9.891760000000000  | 10.381830000000001 |
| F  | 8.789529999999999  | 12.491910000000001 | 2.204850000000000  |
| F  | 8.560660000000000  | 9.540210000000000  | 2.195150000000000  |
| F  | 8.956200000000001  | 16.320110000000000 | 6.065240000000000  |
| F  | 8.744780000000000  | 16.322050000000001 | 9.021520000000001  |
| F  | 8.516550000000001  | 12.465820000000001 | 12.856430000000000 |
| F  | 8.403860000000000  | 5.686260000000000  | 6.027930000000000  |
| F  | 8.516100000000000  | 5.676140000000000  | 8.989319999999999  |
| F  | 8.998530000000001  | 14.386649999999999 | 4.155290000000000  |
| F  | 8.585860000000000  | 14.383459999999999 | 10.922580000000000 |
| F  | 8.521580000000000  | 7.625210000000000  | 4.124310000000000  |
| F  | 8.625030000000001  | 7.606450000000000  | 10.900100000000000 |
| F  | 8.554520000000000  | 9.506910000000000  | 12.842770000000000 |
| H  | 13.263330000000000 | 12.247190000000000 | 6.255990000000000  |
| H  | 12.418930000000000 | 10.138830000000000 | 9.343260000000001  |
| H  | 13.323969999999999 | 9.388850000000000  | 10.347780000000000 |
| H  | 12.943170000000000 | 13.783230000000000 | 6.279760000000000  |
| H  | 12.229290000000001 | 10.298090000000000 | 6.134110000000000  |
| H  | 13.679580000000000 | 9.860930000000000  | 5.826630000000000  |
| H  | 11.952560000000000 | 12.306740000000000 | 7.925930000000000  |
| O  | 10.677289999999999 | 10.912419999999999 | 7.509080000000000  |
| O  | 12.826470000000000 | 9.265590000000000  | 9.521490000000000  |
| O  | 13.006620000000000 | 10.520849999999999 | 5.581400000000000  |
| O  | 13.139350000000000 | 13.025539999999999 | 6.856950000000000  |
| O  | 11.390750000000001 | 11.714729999999999 | 8.519310000000001  |
| N  | 8.711449999999999  | 13.015480000000000 | 7.533870000000000  |
| N  | 8.593430000000000  | 8.987450000000001  | 7.517250000000000  |
| N  | 8.705040000000000  | 11.004490000000001 | 5.510420000000000  |
| N  | 8.610659999999999  | 10.999269999999999 | 9.540559999999999  |
| Fe | 8.902189999999999  | 11.003430000000000 | 7.535010000000000  |

Transition Metal: Fe; Functional Group: H; Adsorbate: OH

|    |                   |                    |                    |
|----|-------------------|--------------------|--------------------|
| Fe | 5.684970000000000 | 11.003340000000000 | 10.989319999999999 |
| H  | 5.265740000000000 | 12.378180000000000 | 5.909450000000000  |
| H  | 5.197800000000000 | 9.652240000000001  | 5.910550000000000  |
| H  | 5.503880000000000 | 16.094180000000001 | 9.632610000000000  |
| H  | 5.511930000000000 | 16.091490000000000 | 12.358549999999999 |
| H  | 5.331180000000000 | 12.371270000000001 | 16.077529999999999 |
| H  | 5.277250000000000 | 5.932800000000000  | 9.623900000000001  |
| H  | 5.305010000000000 | 5.928320000000000  | 12.350750000000000 |
| H  | 5.429300000000000 | 14.217990000000000 | 7.786570000000000  |
| H  | 5.457320000000000 | 14.211630000000000 | 14.200939999999999 |
| H  | 5.276270000000000 | 7.810500000000000  | 7.786400000000000  |
| H  | 5.334370000000000 | 7.803870000000000  | 14.195050000000000 |
| H  | 5.279720000000000 | 9.645580000000001  | 16.076380000000000 |
| H  | 8.020379999999999 | 11.833660000000000 | 10.773930000000000 |
| H  | 9.305260000000001 | 14.189950000000000 | 12.030040000000000 |
| H  | 8.622859999999999 | 10.828310000000000 | 12.502700000000001 |
| H  | 9.951219999999999 | 10.374720000000000 | 13.184040000000000 |
| H  | 9.651640000000000 | 12.698330000000000 | 12.287350000000000 |
| H  | 8.533810000000001 | 9.733440000000000  | 9.826960000000000  |
| H  | 9.819950000000000 | 9.526820000000001  | 8.990950000000000  |
| C  | 5.500700000000000 | 15.240539999999999 | 11.680400000000001 |
| C  | 5.475450000000000 | 13.859330000000000 | 12.098670000000000 |
| C  | 5.446660000000000 | 13.441140000000001 | 13.427780000000000 |
| C  | 5.305210000000000 | 6.782530000000000  | 10.303290000000001 |
| C  | 5.333180000000000 | 8.164400000000001  | 9.885429999999999  |
| C  | 5.301900000000000 | 8.582229999999999  | 8.557140000000000  |
| C  | 5.320680000000000 | 6.780370000000000  | 11.673539999999999 |
| C  | 5.358070000000000 | 8.161490000000001  | 12.094709999999999 |
| C  | 5.495500000000000 | 15.242030000000000 | 10.309070000000000 |
| C  | 5.352070000000000 | 8.576860000000000  | 13.425050000000001 |
| C  | 5.284890000000000 | 11.699949999999999 | 6.760060000000000  |
| C  | 5.465360000000000 | 13.861800000000001 | 9.887829999999999  |
| C  | 5.356700000000000 | 12.117649999999999 | 8.142099999999999  |
| C  | 5.249460000000000 | 10.330760000000000 | 6.759960000000000  |
| C  | 5.300880000000000 | 9.911030000000000  | 8.141410000000000  |
| C  | 5.422390000000000 | 13.445959999999999 | 8.558260000000001  |
| C  | 5.341710000000000 | 11.693550000000000 | 15.226160000000000 |
| C  | 5.392550000000000 | 12.112380000000000 | 13.843570000000000 |
| C  | 5.315970000000000 | 10.324299999999999 | 15.226080000000000 |
| C  | 5.350970000000000 | 9.905530000000001  | 13.843370000000000 |
| O  | 7.630650000000000 | 10.957509999999999 | 10.978170000000000 |
| O  | 9.256970000000001 | 11.053540000000000 | 13.239300000000000 |
| O  | 8.993589999999999 | 9.081020000000001  | 9.242260000000000  |
| O  | 9.629120000000000 | 13.390050000000000 | 11.582150000000000 |
| N  | 5.460540000000000 | 13.020519999999999 | 10.992369999999999 |
| N  | 5.371720000000000 | 9.001920000000000  | 10.991149999999999 |
| N  | 5.356550000000000 | 11.013510000000000 | 8.980240000000000  |
| N  | 5.387560000000000 | 11.008620000000001 | 13.004750000000000 |

Transition Metal: Fe; Functional Group: H; Adsorbate: OOH

|    |                    |                    |                    |
|----|--------------------|--------------------|--------------------|
| H  | 5.371280000000000  | 12.420050000000000 | 5.952410000000000  |
| H  | 5.180330000000000  | 9.701180000000001  | 5.917620000000000  |
| H  | 5.432270000000000  | 16.095350000000000 | 9.710410000000000  |
| H  | 5.274220000000000  | 16.072659999999999 | 12.431710000000001 |
| H  | 5.055880000000000  | 12.316459999999999 | 16.109470000000002 |
| H  | 5.016000000000000  | 5.937650000000000  | 9.602679999999999  |
| H  | 5.076940000000000  | 5.914510000000000  | 12.328550000000000 |
| H  | 5.505240000000000  | 14.231500000000000 | 7.854150000000000  |
| H  | 5.171300000000000  | 14.175860000000000 | 14.253840000000000 |
| H  | 5.111890000000000  | 7.838170000000000  | 7.776460000000000  |
| H  | 5.181150000000000  | 7.773670000000000  | 14.181839999999999 |
| H  | 5.086450000000000  | 9.588469999999999  | 16.077660000000002 |
| H  | 9.779010000000000  | 12.298959999999999 | 9.772309999999999  |
| H  | 8.962890000000000  | 10.008730000000000 | 12.963609999999999 |
| H  | 9.894909999999999  | 9.546830000000000  | 14.100090000000000 |
| H  | 9.303839999999999  | 13.787190000000001 | 9.822430000000001  |
| H  | 8.675850000000001  | 10.431340000000001 | 9.625000000000000  |
| H  | 10.119360000000000 | 9.905870000000000  | 9.446899999999999  |
| H  | 8.541740000000001  | 12.247500000000000 | 11.498350000000000 |
| C  | 5.314070000000000  | 15.227570000000000 | 11.747470000000000 |
| C  | 5.277140000000000  | 13.841460000000000 | 12.152410000000000 |
| C  | 5.202630000000000  | 13.411870000000000 | 13.474480000000000 |
| C  | 5.076740000000000  | 6.781590000000000  | 10.286970000000000 |
| C  | 5.139460000000000  | 8.168170000000000  | 9.881390000000000  |
| C  | 5.158260000000000  | 8.599449999999999  | 8.557370000000001  |
| C  | 5.104720000000000  | 6.769500000000000  | 11.655550000000000 |
| C  | 5.174730000000000  | 8.148050000000000  | 12.085750000000001 |
| C  | 5.396270000000000  | 15.237900000000000 | 10.379940000000000 |
| C  | 5.191010000000000  | 8.552899999999999  | 13.417579999999999 |
| C  | 5.341160000000000  | 11.730900000000000 | 6.794070000000000  |
| C  | 5.405840000000000  | 13.857650000000000 | 9.949460000000000  |
| C  | 5.385550000000000  | 12.130590000000000 | 8.183299999999999  |
| C  | 5.244450000000000  | 10.365990000000000 | 6.776700000000000  |
| C  | 5.234720000000000  | 9.930410000000000  | 8.156060000000000  |
| C  | 5.451450000000000  | 13.451980000000001 | 8.616940000000000  |
| C  | 5.107070000000000  | 11.646269999999999 | 15.253520000000000 |
| C  | 5.170120000000000  | 12.079800000000001 | 13.875230000000000 |
| C  | 5.121570000000000  | 10.278169999999999 | 15.236720000000000 |
| C  | 5.184590000000000  | 9.876690000000000  | 13.848269999999999 |
| Fe | 5.498910000000000  | 11.001680000000000 | 11.027480000000001 |
| O  | 7.268650000000000  | 10.866759999999999 | 11.008290000000001 |
| O  | 9.444680000000000  | 9.223380000000001  | 13.301390000000000 |
| O  | 9.495839999999999  | 10.568400000000000 | 9.099890000000000  |
| O  | 9.685730000000000  | 13.082079999999999 | 10.373150000000001 |
| O  | 8.011640000000000  | 11.608639999999999 | 12.062939999999999 |
| N  | 5.325090000000000  | 13.005300000000000 | 11.043250000000000 |
| N  | 5.186570000000000  | 9.001890000000000  | 10.991339999999999 |
| N  | 5.314540000000000  | 11.020410000000000 | 9.015029999999999  |
| N  | 5.206410000000000  | 10.988099999999999 | 13.018500000000000 |

Transition Metal: Mn; Functional Group: F; Adsorbate: OH

|    |                    |                    |                    |
|----|--------------------|--------------------|--------------------|
| C  | 8.741289999999999  | 15.254949999999999 | 8.189900000000000  |
| C  | 8.750430000000000  | 13.877739999999999 | 8.611510000000001  |
| C  | 8.760330000000000  | 13.428979999999999 | 9.934910000000000  |
| C  | 8.759610000000000  | 6.748540000000000  | 6.795060000000000  |
| C  | 8.759449999999999  | 8.125800000000000  | 6.374260000000000  |
| C  | 8.731719999999999  | 8.572550000000000  | 5.050820000000000  |
| C  | 8.760600000000000  | 6.744030000000000  | 8.167540000000001  |
| C  | 8.767670000000001  | 8.119030000000000  | 8.597550000000000  |
| C  | 8.735600000000000  | 15.259690000000001 | 6.817030000000000  |
| C  | 8.766220000000001  | 8.559650000000000  | 9.924060000000001  |
| C  | 8.614300000000000  | 11.695560000000000 | 3.234060000000000  |
| C  | 8.734780000000001  | 13.885040000000000 | 6.385850000000000  |
| C  | 8.674830000000000  | 12.119680000000001 | 4.611360000000000  |
| C  | 8.618230000000001  | 10.323600000000001 | 3.232460000000000  |
| C  | 8.683790000000000  | 9.896810000000000  | 4.607920000000000  |
| C  | 8.710839999999999  | 13.443040000000000 | 5.060090000000000  |
| C  | 8.753610000000000  | 11.676480000000000 | 11.755850000000001 |
| C  | 8.755470000000001  | 12.104419999999999 | 10.378760000000000 |
| C  | 8.752840000000001  | 10.304770000000000 | 11.753259999999999 |
| C  | 8.755670000000000  | 9.882220000000000  | 10.374350000000000 |
| F  | 8.748609999999999  | 9.511540000000000  | 12.836180000000001 |
| F  | 8.551660000000000  | 12.488280000000000 | 2.152150000000000  |
| F  | 8.557150000000000  | 9.534060000000000  | 2.148620000000000  |
| F  | 8.724340000000000  | 16.347290000000001 | 6.029430000000000  |
| F  | 8.735830000000000  | 16.337450000000000 | 8.985160000000000  |
| F  | 8.750100000000000  | 12.465960000000001 | 12.841450000000000 |
| F  | 8.746980000000001  | 5.668140000000000  | 5.999850000000000  |
| F  | 8.748720000000000  | 5.658230000000000  | 8.956750000000000  |
| F  | 8.715520000000000  | 14.408149999999999 | 4.099620000000000  |
| F  | 8.767980000000000  | 14.390660000000000 | 10.898420000000000 |
| F  | 8.737310000000001  | 7.613310000000000  | 4.088480000000000  |
| F  | 8.767239999999999  | 7.593580000000000  | 10.882460000000000 |
| H  | 11.411310000000000 | 11.894629999999999 | 7.268320000000000  |
| H  | 13.068110000000001 | 14.242310000000000 | 8.486450000000000  |
| H  | 12.100820000000001 | 10.823380000000000 | 8.909660000000001  |
| H  | 13.425850000000001 | 10.323729999999999 | 9.563620000000000  |
| H  | 13.114960000000000 | 12.703110000000001 | 8.709980000000000  |
| H  | 11.972400000000000 | 9.696750000000000  | 6.549000000000000  |
| H  | 13.192700000000000 | 9.229810000000001  | 5.707320000000000  |
| Mn | 9.031050000000000  | 11.002050000000001 | 7.488960000000000  |
| O  | 11.009090000000000 | 11.022169999999999 | 7.456680000000000  |
| O  | 12.755330000000001 | 11.025160000000000 | 9.632560000000000  |
| O  | 12.386110000000000 | 8.897959999999999  | 6.136710000000000  |
| O  | 12.998580000000000 | 13.395049999999999 | 8.015330000000001  |
| N  | 8.741199999999999  | 13.048430000000000 | 7.496130000000000  |
| N  | 8.762330000000000  | 8.955570000000000  | 7.488200000000000  |
| N  | 8.699740000000000  | 11.006940000000000 | 5.441170000000000  |
| N  | 8.747900000000000  | 10.994999999999999 | 9.544230000000001  |

Transition Metal: Mn; Functional Group: F; Adsorbate: OOH

|    |                    |                    |                    |
|----|--------------------|--------------------|--------------------|
| C  | 8.559490000000000  | 15.290780000000000 | 8.200310000000000  |
| C  | 8.560499999999999  | 13.913810000000000 | 8.627570000000000  |
| C  | 8.542280000000000  | 13.468990000000000 | 9.951440000000000  |
| C  | 8.586580000000000  | 6.775300000000000  | 6.838540000000000  |
| C  | 8.609970000000001  | 8.151719999999999  | 6.409690000000000  |
| C  | 8.600270000000000  | 8.592860000000000  | 5.085060000000000  |
| C  | 8.603050000000000  | 6.777620000000000  | 8.209590000000000  |
| C  | 8.634480000000000  | 8.155270000000000  | 8.631000000000000  |
| C  | 8.601789999999999  | 15.288550000000001 | 6.829020000000000  |
| C  | 8.628370000000000  | 8.599480000000000  | 9.954160000000000  |
| C  | 8.689990000000000  | 11.712130000000000 | 3.261090000000000  |
| C  | 8.635199999999999  | 13.910900000000000 | 6.405630000000000  |
| C  | 8.694810000000000  | 12.138660000000000 | 4.637310000000000  |
| C  | 8.631069999999999  | 10.340800000000000 | 3.261290000000000  |
| C  | 8.620080000000000  | 9.916169999999999  | 4.637850000000000  |
| C  | 8.700150000000001  | 13.462529999999999 | 5.083790000000000  |
| C  | 8.495419999999999  | 11.717730000000000 | 11.770980000000000 |
| C  | 8.543889999999999  | 12.145189999999999 | 10.396170000000000 |
| C  | 8.538620000000000  | 10.346030000000001 | 11.771680000000000 |
| C  | 8.598229999999999  | 9.923510000000000  | 10.396680000000000 |
| F  | 8.517410000000000  | 9.554290000000000  | 12.855520000000000 |
| F  | 8.719310000000000  | 12.500769999999999 | 2.174660000000000  |
| F  | 8.586160000000000  | 9.549620000000001  | 2.177430000000000  |
| F  | 8.593810000000000  | 16.371469999999999 | 6.033070000000000  |
| F  | 8.519430000000000  | 16.375959999999999 | 8.991320000000000  |
| F  | 8.406120000000000  | 12.505080000000000 | 12.855150000000000 |
| F  | 8.548800000000000  | 5.690830000000000  | 6.046700000000000  |
| F  | 8.574930000000000  | 5.696880000000000  | 9.005789999999999  |
| F  | 8.756700000000000  | 14.425120000000000 | 4.121170000000000  |
| F  | 8.519940000000000  | 14.431350000000000 | 10.913959999999999 |
| F  | 8.567030000000001  | 7.627860000000000  | 4.124880000000000  |
| F  | 8.618819999999999  | 7.639630000000000  | 10.916110000000000 |
| H  | 12.301010000000000 | 12.276220000000000 | 7.995800000000000  |
| H  | 13.646570000000001 | 12.141280000000000 | 6.350000000000000  |
| H  | 12.119289999999999 | 10.195250000000000 | 9.425459999999999  |
| H  | 13.026669999999999 | 9.389709999999999  | 10.388520000000000 |
| H  | 13.709429999999999 | 13.688040000000001 | 6.602650000000000  |
| H  | 12.134760000000000 | 10.681550000000000 | 6.102330000000000  |
| H  | 13.369830000000000 | 9.828040000000000  | 5.666840000000000  |
| Mn | 8.884219999999999  | 11.039009999999999 | 7.523380000000000  |
| O  | 10.869890000000000 | 11.162739999999999 | 7.333440000000000  |
| O  | 12.224720000000000 | 9.311710000000000  | 9.844880000000000  |
| O  | 12.916150000000000 | 10.669750000000001 | 5.486740000000000  |
| O  | 13.725640000000000 | 12.830460000000000 | 7.060990000000000  |
| O  | 11.546849999999999 | 11.810610000000000 | 8.464630000000000  |
| N  | 8.592110000000000  | 13.081180000000000 | 7.518160000000000  |
| N  | 8.637269999999999  | 8.987900000000000  | 7.518450000000000  |
| N  | 8.651240000000000  | 11.027189999999999 | 5.470270000000000  |
| N  | 8.597429999999999  | 11.035280000000000 | 9.563290000000000  |



Transition Metal: Mn; Functional Group: H; Adsorbate: OH

|    |                   |                    |                    |
|----|-------------------|--------------------|--------------------|
| H  | 5.262080000000000 | 9.618760000000000  | 16.086900000000000 |
| H  | 5.136240000000000 | 12.372450000000001 | 5.896170000000000  |
| H  | 5.146010000000000 | 9.647869999999999  | 5.891080000000000  |
| H  | 5.208400000000000 | 16.100420000000000 | 9.646490000000000  |
| H  | 5.243880000000000 | 16.089559999999999 | 12.369820000000001 |
| H  | 5.264380000000000 | 12.342150000000000 | 16.093810000000001 |
| H  | 5.219200000000000 | 5.905230000000000  | 9.611660000000001  |
| H  | 5.245700000000000 | 5.893360000000000  | 12.336230000000000 |
| H  | 5.217520000000000 | 14.217800000000000 | 7.789200000000000  |
| H  | 5.306280000000000 | 14.194039999999999 | 14.211069999999999 |
| H  | 5.233040000000000 | 7.798140000000000  | 7.773950000000000  |
| H  | 5.300310000000000 | 7.775720000000000  | 14.191330000000001 |
| H  | 7.974920000000000 | 11.825810000000001 | 10.653850000000000 |
| H  | 9.447730000000000 | 14.210810000000000 | 12.022570000000000 |
| H  | 8.611340000000000 | 10.884110000000000 | 12.374879999999999 |
| H  | 9.946300000000001 | 10.356310000000001 | 12.994570000000000 |
| H  | 9.708510000000000 | 12.689240000000000 | 12.175170000000000 |
| H  | 8.508360000000000 | 9.635020000000001  | 10.039970000000000 |
| H  | 9.788320000000001 | 9.323140000000000  | 9.221790000000000  |
| C  | 5.264030000000000 | 15.239640000000000 | 11.690360000000000 |
| C  | 5.304290000000000 | 13.856750000000000 | 12.107650000000000 |
| C  | 5.313180000000000 | 13.425060000000000 | 13.436220000000000 |
| C  | 5.245620000000000 | 6.754230000000000  | 10.291950000000000 |
| C  | 5.270380000000000 | 8.137940000000000  | 9.874670000000000  |
| C  | 5.247050000000000 | 8.567700000000000  | 8.547140000000001  |
| C  | 5.260700000000000 | 6.748450000000000  | 11.662710000000001 |
| C  | 5.296610000000000 | 8.129180000000000  | 12.091020000000000 |
| C  | 5.244060000000000 | 15.245180000000000 | 10.318870000000000 |
| C  | 5.306300000000000 | 8.550240000000001  | 13.422430000000000 |
| C  | 5.173550000000000 | 11.693989999999999 | 6.746250000000000  |
| C  | 5.270560000000000 | 13.865869999999999 | 9.889650000000000  |
| C  | 5.226850000000000 | 12.114480000000000 | 8.128890000000000  |
| C  | 5.178120000000000 | 10.323200000000000 | 6.743610000000000  |
| C  | 5.232140000000000 | 9.897890000000000  | 8.124490000000000  |
| C  | 5.242430000000000 | 13.443519999999999 | 8.558439999999999  |
| C  | 5.280820000000000 | 11.667289999999999 | 15.240370000000000 |
| C  | 5.307370000000000 | 12.093990000000000 | 13.858570000000000 |
| C  | 5.280490000000000 | 10.297070000000000 | 15.236520000000001 |
| C  | 5.305190000000000 | 9.878220000000001  | 13.852980000000001 |
| Mn | 5.578590000000000 | 10.993720000000000 | 10.986459999999999 |
| O  | 7.584840000000000 | 10.977819999999999 | 10.943800000000000 |
| O  | 9.287830000000000 | 11.065580000000001 | 13.093240000000000 |
| O  | 9.003840000000000 | 8.893470000000001  | 9.602490000000000  |
| O  | 9.727539999999999 | 13.428550000000000 | 11.518060000000000 |
| N  | 5.309400000000000 | 13.029380000000000 | 10.995020000000000 |
| N  | 5.302030000000000 | 8.965460000000000  | 10.986039999999999 |
| N  | 5.257090000000000 | 11.004670000000001 | 8.957330000000001  |
| N  | 5.316610000000000 | 10.988030000000000 | 13.024089999999999 |

Transition Metal: Mn; Functional Group: H; Adsorbate: OOH

|    |                    |                    |                    |
|----|--------------------|--------------------|--------------------|
| H  | 5.077170000000000  | 9.538510000000000  | 16.109929999999999 |
| H  | 5.274960000000000  | 12.369160000000001 | 5.947640000000000  |
| H  | 5.208130000000000  | 9.647580000000000  | 5.917140000000000  |
| H  | 5.235160000000000  | 16.069189999999999 | 9.721460000000000  |
| H  | 5.147160000000000  | 16.041609999999999 | 12.443130000000000 |
| H  | 5.048680000000000  | 12.262700000000001 | 16.139109999999999 |
| H  | 5.124800000000000  | 5.870390000000000  | 9.617960000000000  |
| H  | 5.128170000000000  | 5.844630000000000  | 12.341220000000000 |
| H  | 5.318550000000000  | 14.195010000000000 | 7.855260000000000  |
| H  | 5.122900000000000  | 14.131119999999999 | 14.272919999999999 |
| H  | 5.198070000000000  | 7.776740000000000  | 7.787300000000000  |
| H  | 5.175840000000000  | 7.713600000000000  | 14.204540000000000 |
| H  | 8.759910000000000  | 12.261469999999999 | 11.609850000000000 |
| H  | 9.958520000000000  | 12.427009999999999 | 9.862539999999999  |
| H  | 8.970370000000001  | 10.028879999999999 | 12.957879999999999 |
| H  | 9.889469999999999  | 9.549189999999999  | 14.101810000000000 |
| H  | 9.432040000000001  | 13.891080000000001 | 9.980200000000000  |
| H  | 8.760330000000000  | 10.711830000000001 | 9.734650000000000  |
| H  | 10.135310000000000 | 10.045339999999999 | 9.409640000000000  |
| C  | 5.184380000000000  | 15.196090000000000 | 11.759290000000000 |
| C  | 5.188750000000000  | 13.809040000000000 | 12.168630000000000 |
| C  | 5.149790000000000  | 13.368230000000001 | 13.492979999999999 |
| C  | 5.156540000000000  | 6.715310000000000  | 10.302619999999999 |
| C  | 5.200270000000000  | 8.101900000000001  | 9.892640000000000  |
| C  | 5.213470000000000  | 8.540360000000000  | 8.567140000000000  |
| C  | 5.155950000000000  | 6.702220000000000  | 11.672560000000001 |
| C  | 5.194850000000000  | 8.080510000000000  | 12.108010000000000 |
| C  | 5.230110000000000  | 15.209780000000000 | 10.389030000000000 |
| C  | 5.182890000000000  | 8.493050000000000  | 13.440930000000000 |
| C  | 5.269310000000000  | 11.683900000000000 | 6.793190000000000  |
| C  | 5.261780000000000  | 13.830830000000001 | 9.953400000000000  |
| C  | 5.289360000000000  | 12.090800000000000 | 8.179970000000001  |
| C  | 5.235380000000000  | 10.313330000000001 | 6.777700000000000  |
| C  | 5.238470000000000  | 9.874520000000000  | 8.155010000000001  |
| C  | 5.299340000000000  | 13.416380000000000 | 8.619970000000000  |
| C  | 5.089080000000000  | 11.595820000000000 | 15.280040000000000 |
| C  | 5.142060000000000  | 12.033709999999999 | 13.903280000000001 |
| C  | 5.105270000000000  | 10.225030000000000 | 15.265860000000000 |
| C  | 5.163540000000000  | 9.818059999999999  | 13.880240000000001 |
| Mn | 5.485650000000000  | 10.955909999999999 | 11.039280000000000 |
| O  | 7.496230000000000  | 10.972619999999999 | 10.930690000000000 |
| O  | 9.354979999999999  | 9.216749999999999  | 13.361010000000000 |
| O  | 9.558350000000001  | 10.778180000000001 | 9.131840000000000  |
| O  | 9.907560000000000  | 13.205180000000000 | 10.479830000000000 |
| O  | 8.158140000000000  | 11.619930000000000 | 12.081340000000001 |
| N  | 5.231630000000000  | 12.989150000000000 | 11.053520000000001 |
| N  | 5.221020000000000  | 8.922950000000000  | 11.007720000000001 |
| N  | 5.269410000000000  | 10.972320000000000 | 8.999510000000001  |
| N  | 5.181600000000000  | 10.935269999999999 | 13.060480000000000 |

Transition Metal: Ni; Functional Group: F; Adsorbate: OH

|    |                    |                    |                    |
|----|--------------------|--------------------|--------------------|
| Ni | 9.043540000000000  | 10.995490000000000 | 7.490100000000000  |
| C  | 8.773080000000000  | 15.288330000000000 | 8.184010000000001  |
| C  | 8.805360000000000  | 13.904570000000000 | 8.597510000000000  |
| C  | 8.790990000000001  | 13.432029999999999 | 9.913069999999999  |
| C  | 8.769880000000001  | 6.713220000000000  | 6.799330000000000  |
| C  | 8.805339999999999  | 8.097820000000000  | 6.386740000000000  |
| C  | 8.792040000000000  | 8.567349999999999  | 5.070840000000000  |
| C  | 8.794680000000000  | 6.710230000000000  | 8.169499999999999  |
| C  | 8.845649999999999  | 8.093260000000001  | 8.587310000000000  |
| C  | 8.792970000000000  | 15.291869999999999 | 6.813150000000000  |
| C  | 8.865330000000000  | 8.559250000000000  | 9.904940000000000  |
| C  | 8.833800000000000  | 11.690189999999999 | 3.265350000000000  |
| C  | 8.838279999999999  | 13.909970000000000 | 6.394530000000000  |
| C  | 8.820209999999999  | 12.113030000000000 | 4.645280000000000  |
| C  | 8.813120000000000  | 10.321910000000001 | 3.264760000000000  |
| C  | 8.786379999999999  | 9.898820000000001  | 4.644200000000000  |
| C  | 8.856380000000000  | 13.442040000000000 | 5.076840000000000  |
| C  | 8.816649999999999  | 11.677479999999999 | 11.720140000000001 |
| C  | 8.789820000000001  | 12.101599999999999 | 10.340809999999999 |
| C  | 8.838480000000001  | 10.309510000000000 | 11.718990000000000 |
| C  | 8.827140000000000  | 9.888090000000000  | 10.338410000000000 |
| F  | 8.832610000000001  | 9.516380000000000  | 12.802860000000001 |
| F  | 8.829850000000000  | 12.483409999999999 | 2.180950000000000  |
| F  | 8.792930000000000  | 9.531120000000000  | 2.180120000000000  |
| F  | 8.761270000000000  | 16.372930000000000 | 6.014240000000000  |
| F  | 8.729160000000000  | 16.366409999999998 | 8.986540000000000  |
| F  | 8.798310000000001  | 12.468650000000000 | 12.805320000000000 |
| F  | 8.716340000000001  | 5.637330000000000  | 5.996620000000000  |
| F  | 8.760230000000000  | 5.630980000000000  | 8.970330000000001  |
| F  | 8.910100000000000  | 14.389379999999999 | 4.105710000000000  |
| F  | 8.777500000000000  | 14.377219999999999 | 10.887380000000000 |
| F  | 8.776949999999999  | 7.624520000000000  | 4.098500000000000  |
| F  | 8.916029999999999  | 7.611430000000000  | 10.874900000000000 |
| H  | 11.288340000000000 | 11.923080000000001 | 7.321150000000000  |
| H  | 13.092140000000001 | 14.272480000000000 | 8.545240000000000  |
| H  | 11.991580000000001 | 10.850890000000000 | 8.959149999999999  |
| H  | 13.316300000000000 | 10.360920000000000 | 9.636749999999999  |
| H  | 13.000690000000001 | 12.738910000000001 | 8.803920000000000  |
| H  | 11.857849999999999 | 9.846299999999999  | 6.338920000000000  |
| H  | 13.119009999999999 | 9.445740000000001  | 5.515440000000000  |
| O  | 11.001530000000001 | 11.000330000000000 | 7.484330000000000  |
| O  | 12.627470000000001 | 11.044200000000000 | 9.705819999999999  |
| O  | 12.233980000000001 | 9.130190000000001  | 5.764720000000000  |
| O  | 12.872479999999999 | 13.430870000000001 | 8.112050000000000  |
| N  | 8.853790000000000  | 13.076040000000001 | 7.494750000000000  |
| N  | 8.857699999999999  | 8.926360000000001  | 7.487620000000000  |
| N  | 8.747579999999999  | 11.004740000000000 | 5.486450000000000  |
| N  | 8.754080000000000  | 10.994300000000001 | 9.497760000000000  |

Transition Metal: Ni; Functional Group: F; Adsorbate: OOH

|    |                    |                    |                    |
|----|--------------------|--------------------|--------------------|
| Ni | 8.849270000000001  | 11.056990000000001 | 7.527150000000000  |
| C  | 8.506140000000000  | 15.305370000000000 | 8.225500000000000  |
| C  | 8.496600000000001  | 13.923930000000000 | 8.649100000000001  |
| C  | 8.515430000000000  | 13.466780000000000 | 9.972700000000000  |
| C  | 8.453300000000000  | 6.770980000000000  | 6.854220000000000  |
| C  | 8.457739999999999  | 8.152839999999999  | 6.431310000000000  |
| C  | 8.412720000000000  | 8.606629999999999  | 5.105260000000000  |
| C  | 8.538729999999999  | 6.770940000000000  | 8.223319999999999  |
| C  | 8.585070000000000  | 8.152740000000000  | 8.642530000000001  |
| C  | 8.513809999999999  | 15.304950000000000 | 6.853660000000000  |
| C  | 8.640050000000000  | 8.607020000000000  | 9.966770000000000  |
| C  | 8.472260000000000  | 11.719420000000000 | 3.258780000000000  |
| C  | 8.507830000000000  | 13.923000000000000 | 6.430040000000000  |
| C  | 8.508740000000000  | 12.142799999999999 | 4.641610000000000  |
| C  | 8.414370000000000  | 10.349610000000000 | 3.260990000000000  |
| C  | 8.433690000000000  | 9.928039999999999  | 4.643480000000000  |
| C  | 8.528010000000000  | 13.465520000000000 | 5.104600000000000  |
| C  | 8.554990000000000  | 11.719070000000000 | 11.814380000000000 |
| C  | 8.541069999999999  | 12.142630000000000 | 10.432600000000001 |
| C  | 8.594600000000000  | 10.347960000000000 | 11.811450000000001 |
| C  | 8.607860000000001  | 9.929830000000001  | 10.427650000000000 |
| F  | 8.595020000000000  | 9.552450000000000  | 12.896940000000001 |
| F  | 8.488560000000000  | 12.509539999999999 | 2.169180000000000  |
| F  | 8.351620000000000  | 9.556490000000000  | 2.175250000000000  |
| F  | 8.522580000000000  | 16.392740000000000 | 6.059520000000000  |
| F  | 8.508290000000001  | 16.393200000000000 | 9.019530000000000  |
| F  | 8.522280000000000  | 12.507040000000000 | 12.904880000000000 |
| F  | 8.369120000000001  | 5.684060000000000  | 6.063440000000000  |
| F  | 8.551589999999999  | 5.684360000000000  | 9.016750000000000  |
| F  | 8.556260000000000  | 14.432000000000000 | 4.143650000000000  |
| F  | 8.524440000000000  | 14.431490000000000 | 10.934540000000000 |
| F  | 8.355630000000000  | 7.639810000000000  | 4.146550000000000  |
| F  | 8.713530000000000  | 7.643860000000000  | 10.924750000000000 |
| H  | 13.530030000000000 | 11.986890000000001 | 6.161060000000000  |
| H  | 12.285159999999999 | 10.145670000000001 | 9.399250000000000  |
| H  | 13.180830000000000 | 9.249020000000000  | 10.275910000000000 |
| H  | 13.587300000000001 | 13.527620000000001 | 6.467900000000000  |
| H  | 12.021490000000000 | 10.495860000000000 | 5.782010000000000  |
| H  | 13.276820000000001 | 9.744059999999999  | 5.265820000000000  |
| H  | 12.279100000000000 | 12.255409999999999 | 7.776010000000000  |
| O  | 10.750999999999999 | 11.195340000000000 | 7.321390000000000  |
| O  | 12.580220000000001 | 9.222420000000000  | 9.511300000000000  |
| O  | 12.813129999999999 | 10.598459999999999 | 5.211420000000000  |
| O  | 13.611540000000000 | 12.653150000000000 | 6.894780000000000  |
| O  | 11.437329999999999 | 11.963360000000000 | 8.285750000000000  |
| N  | 8.487270000000001  | 13.094030000000000 | 7.539000000000000  |
| N  | 8.530070000000000  | 8.984660000000000  | 7.536450000000000  |
| N  | 8.489480000000000  | 11.036130000000000 | 5.472720000000000  |
| N  | 8.566290000000000  | 11.038169999999999 | 9.600759999999999  |

Transition Metal: Ni; Functional Group: H; Adsorbate: OH

|    |                   |                    |                    |
|----|-------------------|--------------------|--------------------|
| Ni | 5.456730000000000 | 10.993860000000000 | 10.969030000000000 |
| C  | 5.319680000000000 | 15.210380000000001 | 11.665950000000000 |
| C  | 5.315810000000000 | 13.826950000000000 | 12.080000000000000 |
| C  | 5.297900000000000 | 13.415160000000000 | 13.406180000000001 |
| C  | 5.265430000000000 | 6.780040000000000  | 10.275240000000000 |
| C  | 5.268480000000000 | 8.164930000000000  | 9.862130000000001  |
| C  | 5.244350000000000 | 8.575020000000000  | 8.536410000000000  |
| C  | 5.304040000000000 | 6.775000000000000  | 11.641280000000000 |
| C  | 5.326460000000000 | 8.157280000000000  | 12.063520000000000 |
| C  | 5.344870000000000 | 15.215700000000000 | 10.298130000000000 |
| C  | 5.348780000000000 | 8.559410000000000  | 13.392460000000000 |
| C  | 5.276920000000000 | 11.689800000000000 | 6.752010000000000  |
| C  | 5.349130000000000 | 13.835430000000001 | 9.874470000000001  |
| C  | 5.306040000000000 | 12.105250000000000 | 8.135980000000000  |
| C  | 5.237390000000000 | 10.323430000000000 | 6.750900000000000  |
| C  | 5.247960000000000 | 9.903330000000000  | 8.133050000000001  |
| C  | 5.349580000000000 | 13.431120000000000 | 8.545610000000000  |
| C  | 5.284130000000000 | 11.666040000000001 | 15.192130000000001 |
| C  | 5.292530000000000 | 12.087230000000000 | 13.809860000000000 |
| C  | 5.307990000000000 | 10.299580000000001 | 15.188380000000000 |
| C  | 5.325490000000000 | 9.885479999999999  | 13.803879999999999 |
| N  | 5.326850000000000 | 12.989710000000001 | 10.974230000000000 |
| N  | 5.295300000000000 | 9.002070000000000  | 10.965880000000000 |
| N  | 5.272540000000000 | 11.002900000000000 | 8.975730000000000  |
| N  | 5.299800000000000 | 10.988250000000001 | 12.965859999999999 |
| O  | 7.505860000000000 | 10.949719999999999 | 10.948630000000000 |
| O  | 9.121140000000000 | 11.087660000000000 | 13.125330000000000 |
| O  | 8.864570000000001 | 9.122360000000000  | 9.252730000000000  |
| O  | 9.609059999999999 | 13.459580000000001 | 11.558610000000000 |
| H  | 5.310820000000000 | 9.614390000000000  | 16.033650000000002 |
| H  | 5.282640000000000 | 12.373799999999999 | 5.906000000000000  |
| H  | 5.209070000000000 | 9.641590000000001  | 5.903460000000000  |
| H  | 5.351170000000000 | 16.065890000000000 | 9.619320000000000  |
| H  | 5.300330000000000 | 16.055499999999999 | 12.350989999999999 |
| H  | 5.264940000000000 | 12.346550000000001 | 16.040610000000001 |
| H  | 5.240550000000000 | 5.936220000000000  | 9.589040000000001  |
| H  | 5.312170000000000 | 5.926070000000000  | 12.321540000000001 |
| H  | 5.375010000000000 | 14.203989999999999 | 7.776560000000000  |
| H  | 5.290800000000000 | 14.184189999999999 | 14.179349999999999 |
| H  | 5.237110000000000 | 7.805890000000000  | 7.762940000000000  |
| H  | 5.373190000000000 | 7.785700000000000  | 14.161289999999999 |
| H  | 7.784780000000000 | 11.849250000000000 | 10.680640000000000 |
| H  | 9.332039999999999 | 14.242270000000000 | 12.063980000000001 |
| H  | 8.457030000000000 | 10.900700000000001 | 12.392030000000000 |
| H  | 9.789880000000000 | 10.386440000000000 | 13.043110000000000 |
| H  | 9.572960000000000 | 12.716419999999999 | 12.210470000000001 |
| H  | 8.374350000000000 | 9.781430000000000  | 9.812700000000000  |
| H  | 9.714130000000001 | 9.554370000000000  | 9.060890000000001  |

Transition Metal: Ni; Functional Group: H; Adsorbate: OOH

|    |                    |                    |                    |
|----|--------------------|--------------------|--------------------|
| Ni | 5.191360000000000  | 11.005810000000000 | 10.989710000000001 |
| C  | 5.080110000000000  | 15.220390000000000 | 11.681460000000000 |
| C  | 5.079550000000000  | 13.835649999999999 | 12.094830000000000 |
| C  | 5.053760000000000  | 13.426430000000000 | 13.421720000000001 |
| C  | 5.022380000000000  | 6.789210000000000  | 10.296419999999999 |
| C  | 5.021420000000000  | 8.174350000000000  | 9.882140000000000  |
| C  | 4.994820000000000  | 8.583900000000000  | 8.555740000000000  |
| C  | 5.087090000000000  | 6.787240000000000  | 11.661490000000001 |
| C  | 5.114710000000000  | 8.170769999999999  | 12.079770000000000 |
| C  | 5.122230000000000  | 15.224470000000000 | 10.314299999999999 |
| C  | 5.158250000000000  | 8.573100000000000  | 13.407400000000001 |
| C  | 5.066270000000000  | 11.698600000000001 | 6.773410000000000  |
| C  | 5.140610000000000  | 13.841930000000000 | 9.893720000000000  |
| C  | 5.118570000000000  | 12.111760000000000 | 8.157170000000001  |
| C  | 5.006820000000000  | 10.333190000000000 | 6.772000000000000  |
| C  | 5.029450000000000  | 9.912540000000000  | 8.154370000000000  |
| C  | 5.154950000000000  | 13.438240000000000 | 8.564830000000001  |
| C  | 5.079130000000000  | 11.677210000000001 | 15.207490000000000 |
| C  | 5.063080000000000  | 12.097730000000000 | 13.824199999999999 |
| C  | 5.126080000000000  | 10.311470000000000 | 15.202430000000000 |
| C  | 5.128590000000000  | 9.899210000000000  | 13.816630000000000 |
| O  | 7.430480000000000  | 10.814230000000000 | 11.074109999999999 |
| O  | 9.510020000000001  | 9.101390000000000  | 13.344580000000001 |
| O  | 9.147270000000001  | 10.814450000000001 | 8.886649999999999  |
| O  | 9.602880000000001  | 13.214760000000000 | 10.211990000000000 |
| O  | 8.102570000000000  | 11.667280000000000 | 11.979710000000001 |
| H  | 5.156030000000000  | 9.625540000000001  | 16.046189999999999 |
| H  | 5.067960000000000  | 12.384040000000001 | 5.928150000000000  |
| H  | 4.951900000000000  | 9.652740000000000  | 5.924670000000000  |
| H  | 5.125860000000000  | 16.073570000000000 | 9.633279999999999  |
| H  | 5.048740000000000  | 16.065690000000000 | 12.366220000000000 |
| H  | 5.063360000000000  | 12.358590000000000 | 16.055990000000001 |
| H  | 4.981530000000000  | 5.944330000000000  | 9.611610000000001  |
| H  | 5.109530000000000  | 5.940000000000000  | 12.343510000000000 |
| H  | 5.168360000000000  | 14.210710000000001 | 7.794340000000000  |
| H  | 5.038080000000000  | 14.196460000000000 | 14.194710000000001 |
| H  | 4.952320000000000  | 7.816070000000000  | 7.781790000000000  |
| H  | 5.204650000000000  | 7.800500000000000  | 14.175630000000000 |
| H  | 9.610180000000000  | 12.450060000000001 | 9.575020000000000  |
| H  | 8.985250000000001  | 9.810990000000000  | 12.924860000000001 |
| H  | 10.117839999999999 | 9.580600000000000  | 13.933490000000001 |
| H  | 9.163200000000000  | 13.940260000000000 | 9.735709999999999  |
| H  | 8.444590000000000  | 10.708489999999999 | 9.587809999999999  |
| H  | 9.780290000000001  | 10.096100000000000 | 9.060180000000001  |
| H  | 8.571500000000000  | 12.332050000000001 | 11.386509999999999 |
| N  | 5.112540000000000  | 12.995360000000000 | 10.991920000000000 |
| N  | 5.069360000000000  | 9.015319999999999  | 10.982200000000001 |
| N  | 5.094240000000000  | 11.010240000000000 | 9.000280000000000  |
| N  | 5.080290000000000  | 11.001010000000001 | 12.978470000000000 |
